# Supplementary material for: RNA sequencing reveals novel LncRNA/mRNAs co-expression network associated with puerarin-mediated inhibition of cardiac hypertrophy in mice
Source: PeerJ. 2022 Apr 5;10:e13144. doi: 10.7717/peerj.13144 (PMC8992661; doi:10.7717/peerj.13144)
Supplement: Supplemental Information 3 [file peerj-10-13144-s003.xlsx]

## Sheet: CON vs TAC
Symbol	Gene_Name	Trans_Name	Locus	Strand	Trans_Type	CON1（TPM）	CON2（TPM）	CON3（TPM）	TAC1（TPM）	TAC2（TPM）	TAC3（TPM）	AVG CON	AVG TAC	Fold_Change	logFC	p_value	adj.P.Val
ENSMUST00000174377.1	Selenbp2	Selenbp2-207	chr3:94693648-94704170	+	processed_transcript	1	1	1	69.915	64.6312	83.2901	1	72.6121	72.6121	6.18214	0.000208443	0.00882467
ENSMUST00000126117.1	Ubl4a	Ubl4a-203	chrX:74365719-74368558	-	processed_transcript	1	76.083	1	242.982	236.181	226.155	26.0277	235.106	9.03291	3.17519	0.00120564	0.0148147
ENSMUST00000129383.1	Arhgef1	Arhgef1-208	chr7:24903065-24904384	+	processed_transcript	1	1	10.5239	99.1487	96.7167	169.518	4.17463	121.794	29.1749	4.86666	0.00813664	0.0370636
ENSMUST00000181395.1	Gm4673	Gm4673-201	chr7:30957409-30961619	+	antisense_RNA	1	1	1	27.0087	48.6412	85.418	1	53.6893	53.6893	5.74656	0.0365591	0.0966342
ENSMUST00000163196.1	Gm17041	Gm17041-201	chr9:107300380-107301838	-	antisense_RNA	1	1	1	19.9469	79.5979	43.1348	1	47.5599	47.5599	5.57167	0.0551245	0.128991
ENSMUST00000140973.7	Brpf3	Brpf3-207	chr17:28823674-28838541	+	processed_transcript	1.02534	2.23007	1.53388	48.866	68.1303	69.8046	1.59643	62.267	39.004	5.28555	0.000837013	0.0133869
ENSMUST00000197566.1	Chpf2	Chpf2-204	chr5:24586772-24588248	+	processed_transcript	1	1	1	35.4541	98.7469	11.2108	1	48.4706	48.4706	5.59904	0.143009	0.255308
ENSMUST00000134296.7	Adam11	Adam11-205	chr11:102774081-102776124	+	processed_transcript	1.50775	3.74054	3.29869	131.317	98.4065	52.3041	2.84899	94.0094	32.9974	5.04428	0.0164498	0.0576317
ENSMUST00000156402.1	Lepr	Lepr-207	chr4:101771368-101782895	+	processed_transcript	1.41156	2.39902	1.74044	61.9649	48.3749	68.5067	1.85034	59.6155	32.2186	5.00982	0.000624517	0.0121479
ENSMUST00000148844.1	Gm12523	Gm12523-201	chr3:108283898-108284843	-	antisense_RNA	1	1	1	37.2136	21.5161	35.7802	1	31.5033	31.5033	4.97743	0.00368143	0.0239009
ENSMUST00000136440.1	Slc4a2	Slc4a2-206	chr5:24428263-24429838	+	processed_transcript	1	1	1	23.7839	38.769	23.7608	1	28.7712	28.7712	4.84655	0.00513841	0.0287318
ENSMUST00000201189.1	Mxd4	Mxd4-203	chr5:34173883-34175336	-	processed_transcript	1.05141	1.19645	1.18356	246.545	121.107	1.05509	1.14381	122.902	107.45	6.74752	0.160928	0.275954
ENSMUST00000138651.1	Npdc1	Npdc1-209	chr2:25408873-25409491	+	processed_transcript	1	1	1	1	145.796	139.238	1	95.3447	95.3447	6.57508	0.11633	0.220992
ENSMUST00000189436.1	Ndufv3	Ndufv3-204	chr17:31520150-31527839	+	processed_transcript	1	1	520.027	176.908	211.66	279.945	174.009	222.838	1.28061	0.356831	0.794783	0.85778
ENSMUST00000198688.4	Nop53	Nop53-203	chr7:15937838-15945801	-	processed_transcript	63.4475	7.33062	1	88.1792	764.885	118.6	23.926	323.888	13.537	3.75884	0.247227	0.375047
ENSMUST00000147012.1	Gm13431	Gm13431-203	chr2:36216777-36217502	+	lincRNA	1	1	1	33.7763	17.1328	25.6366	1	25.5152	25.5152	4.67329	0.00697248	0.0341042
ENSMUST00000180865.2	Gm9917	Gm9917-201	chr9:107558809-107568412	-	antisense_RNA	1	1	1	14.1782	33.7441	30.8478	1	26.2567	26.2567	4.71461	0.0143465	0.0529506
ENSMUST00000225785.1	Ptprs	Ptprs-221	chr17:56427989-56435985	-	processed_transcript	1	1	16.8722	529.191	457.475	1	6.29074	329.222	52.3344	5.70969	0.122775	0.229429
ENSMUST00000149974.1	H19	H19-204	chr7:142576507-142578095	-	lincRNA	176.173	1	1	247.119	59.2875	157.702	59.3912	154.703	2.60481	1.38118	0.297779	0.429245
ENSMUST00000155199.1	1810012K08Rik	1810012K08Rik-201	chr2:26138546-26139543	+	lincRNA	1	1	1	16.7131	39.0769	19.3021	1	25.0307	25.0307	4.64563	0.0272155	0.0793472
ENSMUST00000212215.1	Exoc3l	Exoc3l-203	chr8:105293592-105296024	-	processed_transcript	1	1	1	34.7744	10.6929	33.1366	1	26.2013	26.2013	4.71157	0.0315542	0.0878774
ENSMUST00000142439.1	Bahcc1	Bahcc1-204	chr11:120236445-120237284	+	processed_transcript	2.49234	1	4.97211	39.8644	52.5573	60.9818	2.82149	51.1345	18.1232	4.17977	0.00150434	0.0164045
ENSMUST00000217781.1	Lsm7	Lsm7-202	chr10:80852933-80855023	-	processed_transcript	27.2438	5.23807	6.23807	686.836	267.903	46.8277	12.9066	333.855	25.8669	4.69304	0.162652	0.277965
ENSMUST00000059704.4	4632415L05Rik	4632415L05Rik-201	chr3:19894886-19895962	+	lincRNA	10.5047	17.4967	11.4289	243.532	302.283	246	13.1434	263.938	20.0814	4.32779	0.000202797	0.00888426
ENSMUST00000151238.7	Hint2	Hint2-205	chr4:43654227-43656443	-	processed_transcript	190.728	1	1	114.709	324.373	37.9373	64.2428	159.006	2.47508	1.30748	0.423574	0.545911
ENSMUST00000191079.1	Dubr	Dubr-205	chr16:50719299-50732683	-	lincRNA	8.48066	1	1	14.6972	65.4013	64.8184	3.49355	48.3056	13.8271	3.78942	0.057719	0.133328
ENSMUST00000150966.7	Clec10a	Clec10a-205	chr11:70167874-70169717	+	processed_transcript	1	1	1	13.511	13.1729	39.6529	1	22.1123	22.1123	4.46677	0.0737871	0.158322
ENSMUST00000133310.1	Mink1	Mink1-207	chr11:70598988-70605031	+	processed_transcript	201.486	1	1	46.0111	142.187	212.307	67.8287	133.502	1.96822	0.976891	0.470071	0.58721
ENSMUST00000174754.7	4930481A15Rik	4930481A15Rik-205	chr19:5406762-5417580	+	antisense_RNA	2.52752	1.10403	1.11136	63.9395	92.0082	2.92108	1.58097	52.9563	33.496	5.06592	0.122487	0.229231
ENSMUST00000228078.1	Gm26782	Gm26782-206	chr14:50870363-50876820	+	antisense_RNA	1	1	1	1	121.465	44.2314	1	55.5655	55.5655	5.79612	0.196384	0.316705
ENSMUST00000132290.1	Ciz1	Ciz1-211	chr2:32370062-32371750	+	processed_transcript	1	1	1	43.1215	1	116.754	1	53.625	53.625	5.74483	0.19474	0.314961
ENSMUST00000199611.4	Ccdc12	Ccdc12-207	chr9:110656612-110711513	+	processed_transcript	1	1	1	60.3861	83.207	1	1	48.1977	48.1977	5.59089	0.126345	0.233502
ENSMUST00000141792.7	Eml2	Eml2-205	chr7:19181332-19184922	+	processed_transcript	1	1	2.90618	14.0284	23.3328	38.4009	1.63539	25.254	15.4422	3.9488	0.0295753	0.0838966
ENSMUST00000129770.1	Src	Src-206	chr2:157424392-157458600	+	processed_transcript	2.90817	1	1	76.0092	3.98072	40.1817	1.63606	40.0572	24.484	4.61377	0.13848	0.248988
ENSMUST00000131453.1	Abcc5	Abcc5-207	chr16:20400762-20404713	-	processed_transcript	1	1	35.3121	40.6168	79.0394	41.503	12.4374	53.7198	4.31922	2.11077	0.0728109	0.157367
ENSMUST00000154242.1	Snhg17	Snhg17-208	chr2:158356022-158358464	-	lincRNA	1	1	7.39609	29.6392	16.8094	47.1755	3.13203	31.208	9.96416	3.31675	0.0362061	0.0960034
ENSMUST00000047020.1	A930016O22Rik	A930016O22Rik-201	chr7:19418812-19421417	-	antisense_RNA	1	4.93254	1	149.152	1	99.1185	2.31085	83.0901	35.9565	5.16818	0.137092	0.247374
ENSMUST00000214678.1	Dpp8	Dpp8-204	chr9:65075748-65080862	+	processed_transcript	23.2488	1	1	37.2349	31.8034	50.8232	8.41626	39.9538	4.74722	2.24708	0.0277527	0.080309
ENSMUST00000149298.1	Aldh3a2	Aldh3a2-207	chr11:61265224-61267441	-	processed_transcript	13.0773	1	1	37.5581	45.3385	19.4288	5.02578	34.1085	6.78671	2.76271	0.0284259	0.0816941
ENSMUST00000211356.1	Tmem255b	Tmem255b-205	chr8:13435189-13468473	+	processed_transcript	1	1	11.5597	34.6622	29.7856	26.8495	4.51991	30.4325	6.73298	2.75125	0.00348293	0.023553
ENSMUST00000137004.1	Sgsm3	Sgsm3-205	chr15:80977837-81004185	+	processed_transcript	1	1	1	1	51.4298	42.2336	1	31.5545	31.5545	4.97977	0.120105	0.226032
ENSMUST00000154355.1	Setd4	Setd4-207	chr16:93601638-93603815	-	processed_transcript	31.2715	1	1	67.6893	65.0434	15.242	11.0905	49.3249	4.44749	2.15299	0.125941	0.233184
ENSMUST00000137343.7	Snhg12	Snhg12-204	chr4:132308678-132309971	+	lincRNA	1.74433	28.4199	1.15657	233.894	158.281	2.75173	10.4403	131.642	12.6091	3.65639	0.152157	0.266262
ENSMUST00000151359.1	Ccng1	Ccng1-202	chr11:40749090-40753938	-	processed_transcript	1	1	20.7163	28.3303	34.2147	36.5973	7.57209	33.0475	4.36438	2.12578	0.0221424	0.069116
ENSMUST00000145626.1	Pafah2	Pafah2-206	chr4:134402970-134422532	+	processed_transcript	7.40505	1	1	94.5029	1	120.954	3.13502	72.1522	23.0149	4.5245	0.131214	0.240384
ENSMUST00000172643.7	Ube4b	Ube4b-209	chr4:149385126-149426600	-	processed_transcript	1	1	1	50.7187	1	29.2486	1	26.9891	26.9891	4.7543	0.14536	0.257951
ENSMUST00000136424.1	Tmem165	Tmem165-203	chr5:76183950-76196987	+	processed_transcript	14.5054	1	1	12.7124	32.071	52.4579	5.50179	32.4137	5.89149	2.55863	0.0943962	0.189168
ENSMUST00000134861.7	Tm6sf1	Tm6sf1-206	chr7:81859118-81865398	+	processed_transcript	18.2482	34.8501	28.2848	274.7	502.048	183.097	27.1277	319.948	11.7942	3.56	0.0367728	0.0968941
ENSMUST00000154803.1	Il34	Il34-205	chr8:110741829-110742698	-	processed_transcript	1.54531	1.31721	1.51883	50.6164	65.0345	1.18802	1.46045	38.9463	26.6673	4.737	0.124521	0.231234
ENSMUST00000133269.7	Lipo3	Lipo3-203	chr19:33517740-33590154	-	processed_transcript	9.62261	17.1155	8.4878	162.693	184.734	58.3676	11.742	135.265	11.5198	3.52604	0.0341201	0.0924177
ENSMUST00000212018.1	Hp	Hp-202	chr8:109575762-109578657	-	processed_transcript	1	1	1	32.7232	1	38.0047	1	23.9093	23.9093	4.5795	0.11846	0.224025
ENSMUST00000136705.1	Ubap1	Ubap1-204	chr4:41349048-41371285	+	processed_transcript	4.7628	1	1	157.243	1	36.4276	2.25427	64.89	28.7854	4.84727	0.256128	0.384268
ENSMUST00000120364.1	Dancr	Dancr-202	chr5:74093077-74094337	+	lincRNA	1	1	1	1.12685	18.2152	56.2603	1	25.2008	25.2008	4.6554	0.211665	0.334285
ENSMUST00000131313.1	Tbrg4	Tbrg4-202	chr11:6620180-6621065	-	processed_transcript	32.6173	1	1	10.0489	75.6448	48.5875	11.5391	44.7604	3.87903	1.95569	0.201464	0.3215
ENSMUST00000130286.1	Itgb4	Itgb4-207	chr11:115992932-115994330	+	processed_transcript	1.12144	1.12334	7.19765	27.8503	29.0214	12.6182	3.14748	23.1633	7.35932	2.87957	0.0240676	0.0729999
ENSMUST00000201483.3	Mrpl33	Mrpl33-202	chr5:31614017-31622637	+	processed_transcript	293.058	1	215.022	519.064	393.022	335.149	169.693	415.745	2.44998	1.29277	0.0748994	0.160163
ENSMUST00000143206.7	Chchd3	Chchd3-210	chr6:32792637-32897071	-	processed_transcript	26.0152	4.36844	6.44145	83.1303	89.5082	98.5364	12.275	90.3917	7.36387	2.88046	0.000683583	0.012615
ENSMUST00000146373.1	Irf7	Irf7-208	chr7:141265376-141266421	-	processed_transcript	1	1	14.0106	33.4355	12.8245	31.0769	5.33687	25.779	4.83036	2.27213	0.0592647	0.135901
ENSMUST00000127835.1	Strn4	Strn4-205	chr7:16830134-16831509	+	processed_transcript	1.17425	1	7.2755	14.9168	47.6535	10.1846	3.14992	24.2516	7.69914	2.9447	0.152432	0.266466
ENSMUST00000156394.1	Snf8	Snf8-205	chr11:96044824-96047319	+	processed_transcript	43.4004	2.09287	1.87743	63.7018	19.654	106.354	15.7902	63.2366	4.0048	2.00173	0.172274	0.288344
ENSMUST00000140387.1	Prr5l	Prr5l-205	chr2:101772295-101797733	-	processed_transcript	2.17311	1	1	56.1909	4.517	6.52177	1.39104	22.4099	16.1102	4.0099	0.281633	0.411385
ENSMUST00000154955.1	Mtmr11	Mtmr11-206	chr3:96162589-96171718	+	processed_transcript	1	1	3.02829	1	34.8379	63.37	1.6761	33.0693	19.73	4.30232	0.156785	0.271623
ENSMUST00000201029.3	Sumf2	Sumf2-205	chr5:129847020-129854838	+	processed_transcript	21.9342	31.8003	1	98.4626	42.1791	118.736	18.2448	86.4594	4.73884	2.24453	0.0503834	0.121567
ENSMUST00000152181.1	Las1l	Las1l-207	chrX:95946422-95948203	-	processed_transcript	4.96944	10.9157	4.00044	53.4025	40.6343	67.7307	6.62854	53.9225	8.1349	3.02412	0.00432692	0.0261066
ENSMUST00000197307.1	Magi2	Magi2-204	chr5:20701669-20702803	+	processed_transcript	7.04982	1	1	30.8559	2.32615	66.4599	3.01661	33.214	11.0104	3.46079	0.180921	0.298454
ENSMUST00000183816.1	Kif26a	Kif26a-202	chr12:112179154-112180533	+	processed_transcript	21.3045	1	1	30.7156	36.3122	12.6585	7.76818	26.5621	3.41935	1.77372	0.128637	0.236609
ENSMUST00000125726.7	Rpl11	Rpl11-202	chr4:136049990-136052996	-	processed_transcript	159.008	149.61	119.285	1532.05	1737.91	700.174	142.634	1323.37	9.2781	3.21383	0.0204828	0.0656023
ENSMUST00000138656.1	Ntpcr	Ntpcr-204	chr8:125733090-125748034	+	processed_transcript	34.2008	1.56851	50.0958	124.088	142.751	99.075	28.6217	121.971	4.2615	2.09136	0.00808976	0.0368834
ENSMUST00000222279.1	Bzw2	Bzw2-207	chr12:36119023-36156770	-	processed_transcript	1	1	23.973	55.5214	25.485	10.9758	8.65767	30.6607	3.54145	1.82434	0.221015	0.344303
ENSMUST00000215514.1	Ephb1	Ephb1-204	chr9:101922961-101940567	-	processed_transcript	1	2.00171	1	1	33.4165	38.5711	1.3339	24.3292	18.2391	4.18896	0.12229	0.228948
ENSMUST00000129516.1	Emd	Emd-205	chrX:74254761-74255685	+	processed_transcript	33.2868	24.311	19.039	179.791	373.343	136.717	25.5456	229.951	9.00157	3.17018	0.0485894	0.117973
ENSMUST00000211450.1	Dhx32	Dhx32-210	chr7:133742658-133776616	-	processed_transcript	1	1	1	57.2698	1	7.98095	1	22.0836	22.0836	4.4649	0.299632	0.431052
ENSMUST00000134414.1	Sub1	Sub1-204	chr15:11986454-11995750	-	processed_transcript	11.3569	19.854	5.6078	142.929	51.6549	75.9405	12.2729	90.1747	7.34746	2.87725	0.0477287	0.11684
ENSMUST00000139623.1	H3f3b	H3f3b-204	chr11:116023193-116024514	-	processed_transcript	57.0228	49.2962	61.0173	669.431	362.356	312.397	55.7788	448.061	8.03283	3.00591	0.0246103	0.0742881
ENSMUST00000125831.7	Heatr6	Heatr6-203	chr11:83753714-83782021	+	processed_transcript	1	5.04462	140.481	60.8621	50.1411	100.79	48.8417	70.5978	1.44544	0.531509	0.676074	0.767131
ENSMUST00000218253.1	Mon2	Mon2-204	chr10:123030445-123031065	-	processed_transcript	1	59.9584	1	8.81361	43.4842	67.6149	20.6528	39.9709	1.93538	0.952614	0.499178	0.612335
ENSMUST00000147284.7	Rpap2	Rpap2-207	chr5:107597721-107601969	+	processed_transcript	12.2299	1.39626	1.62367	20.8965	68.8431	8.23038	5.08328	32.6567	6.42433	2.68355	0.216392	0.339093
ENSMUST00000150652.1	Dek	Dek-206	chr13:47105381-47106183	-	processed_transcript	30.6136	88.7509	40.2322	471.396	193.521	505.609	53.1989	390.175	7.33428	2.87465	0.0284421	0.0816474
ENSMUST00000182408.1	4632427E13Rik	4632427E13Rik-203	chr7:92740706-92741459	-	bidirectional_promoter_lncRNA	1	1	10.4507	1	89.6224	48.0222	4.15022	46.2149	11.1355	3.4771	0.178244	0.295005
ENSMUST00000143933.1	Dek	Dek-205	chr13:47101487-47106154	-	processed_transcript	68.8219	99.5774	134.06	1400.68	448	552.692	100.82	800.458	7.93949	2.98905	0.0815818	0.170685
ENSMUST00000220301.1	Csrp2	Csrp2-206	chr10:110934671-110939514	+	processed_transcript	1.28208	1	1.32111	421.164	1	1.51266	1.20106	141.226	117.584	6.87754	0.373732	0.506282
ENSMUST00000126738.7	Tmem268	Tmem268-204	chr4:63558856-63562491	+	processed_transcript	31.7327	1	22.6108	51.9322	65.2218	78.0647	18.4478	65.0729	3.5274	1.8186	0.0169432	0.0585459
ENSMUST00000224015.1	Thoc7	Thoc7-203	chr14:13949118-13961212	-	processed_transcript	4.91147	4.33507	5.06859	42.5607	251.578	3.61047	4.77171	99.2498	20.7996	4.37849	0.287053	0.416764
ENSMUST00000164000.1	Nisch	Nisch-204	chr14:31183513-31184949	-	processed_transcript	7.67508	1	1	66.4956	1	40.0796	3.22503	35.8584	11.1188	3.47493	0.163638	0.278893
ENSMUST00000133179.2	Gm17077	Gm17077-201	chr7:30955825-30958004	+	antisense_RNA	71.0971	1	1	66.2044	9.29741	39.8751	24.3657	38.459	1.57841	0.658469	0.647679	0.744299
ENSMUST00000156112.7	Nrg4	Nrg4-212	chr9:55242064-55326844	-	processed_transcript	1	25.7285	25.5023	56.7173	68.9335	56.0636	17.4103	60.5714	3.47906	1.7987	0.00940733	0.0404042
ENSMUST00000135379.7	Scp2	Scp2-206	chr4:108044835-108118476	-	processed_transcript	1	29.8798	1	116.157	85.5999	1	10.6266	67.5858	6.36005	2.66904	0.186437	0.305453
ENSMUST00000182537.1	Dleu2	Dleu2-206	chr14:61643342-61682313	-	lincRNA	75.4398	97.6195	29.6541	465.411	653.818	236.008	67.5711	451.746	6.68549	2.74103	0.0349357	0.0935209
ENSMUST00000133169.1	Scmh1	Scmh1-207	chr4:120529155-120530186	+	processed_transcript	1.10004	1.12474	15.1342	53.3365	2.58167	44.579	5.78634	33.499	5.78933	2.5334	0.165257	0.280987
ENSMUST00000134649.1	Gm15655	Gm15655-201	chr8:115705078-115707233	+	antisense_RNA	1	6.32121	5.28606	37.0509	19.6219	15.0104	4.20242	23.8944	5.68587	2.50738	0.0463368	0.113931
ENSMUST00000149238.1	Srebf1	Srebf1-209	chr11:60203101-60204290	-	processed_transcript	3.114	2.8933	23.2437	43.3165	72.2187	21.795	9.75034	45.7767	4.69488	2.23109	0.0887261	0.180899
ENSMUST00000147713.7	Fuom	Fuom-211	chr7:140101103-140102306	-	processed_transcript	18.3111	96.0074	20.4845	657.453	119.083	144.114	44.9343	306.883	6.82959	2.7718	0.213587	0.336582
ENSMUST00000138881.7	Gtpbp6	Gtpbp6-208	chr5:110106649-110108140	-	processed_transcript	10.7433	41.4727	11.505	466.84	66.6609	50.5227	21.2403	194.674	9.16532	3.19618	0.272862	0.402896
ENSMUST00000134769.1	Nat9	Nat9-207	chr11:115184978-115187276	-	processed_transcript	24.5509	1.24529	21.9731	84.2453	47.4278	51.1637	15.9231	60.9456	3.8275	1.9364	0.0312219	0.087338
ENSMUST00000226023.1	Ctla2a	Ctla2a-209	chr13:60934773-60936557	-	processed_transcript	171.95	67.6728	94.7796	727.969	396.833	1084.83	111.467	736.543	6.60769	2.72415	0.0359283	0.0955685
ENSMUST00000187142.1	Zfp469	Zfp469-202	chr8:122269569-122272650	+	lincRNA	1.02575	33.2832	29.3103	55.8266	80.725	62.0669	21.2064	66.2062	3.12199	1.64246	0.0234202	0.0717706
ENSMUST00000166606.1	Gm17092	Gm17092-201	chr5:99977686-99978858	+	antisense_RNA	13.6595	1	7.87146	33.2315	24.3781	37.022	7.51033	31.5439	4.20006	2.07041	0.0101106	0.0422367
ENSMUST00000146437.7	Fahd2a	Fahd2a-205	chr2:127438122-127444480	-	processed_transcript	1	1	1	1	1	277.846	1	93.2821	93.2821	6.54353	0.373901	0.506374
ENSMUST00000175890.1	Fryl	Fryl-211	chr5:73047623-73083289	-	processed_transcript	14.1124	1	14.3259	172.146	17.8655	18.0801	9.81278	69.3637	7.06872	2.82145	0.312557	0.445448
ENSMUST00000128818.1	Lmbr1l	Lmbr1l-206	chr15:98913502-98918055	-	processed_transcript	13.5561	16.0841	1.84551	60.1694	40.5807	44.9092	10.4952	48.5531	4.62621	2.20983	0.00672747	0.033425
ENSMUST00000191828.1	Zc3h11a	Zc3h11a-203	chr1:133624591-133627232	-	processed_transcript	26.6269	1	1	55.1104	121.579	1	9.5423	59.2297	6.20707	2.63391	0.238557	0.365304
ENSMUST00000177165.1	Frg2f1	Frg2f1-204	chr4:119533544-119539529	-	processed_transcript	1	1	53.8491	63.8612	210.381	1	18.6164	91.7473	4.92832	2.30109	0.320109	0.45339
ENSMUST00000156400.7	Gm16286	Gm16286-209	chr18:80206765-80211493	+	processed_transcript	8.21686	6.03633	1.31928	29.035	35.9536	15.0693	5.19082	26.686	5.14099	2.36205	0.0293249	0.0835626
ENSMUST00000151178.1	Rsrp1	Rsrp1-207	chr4:134923626-134925333	+	processed_transcript	1	1	12.9143	67.8023	1	44.3153	4.97142	37.7059	7.58452	2.92306	0.176421	0.292853
ENSMUST00000136764.1	Trpc4ap	Trpc4ap-204	chr2:155673057-155692123	-	processed_transcript	28.6761	2.47374	35.2859	79.9757	91.0003	79.4183	22.1453	83.4648	3.76897	1.91417	0.00459932	0.0267259
ENSMUST00000187926.1	Gm29629	Gm29629-201	chr1:132139504-132142800	+	antisense_RNA	1	4.71531	1	39.7376	1	26.8431	2.23844	22.5269	10.0637	3.33108	0.151266	0.265071
ENSMUST00000127679.1	Cluh	Cluh-203	chr11:74649830-74657339	+	processed_transcript	124.683	74.1082	141.677	775.613	704.334	536.758	113.489	672.235	5.92333	2.56641	0.00161877	0.0168152
ENSMUST00000159829.1	Cldnd1	Cldnd1-202	chr16:58728039-58732908	+	processed_transcript	38.9268	1	1	11.816	12.859	56.6199	13.6423	27.0983	1.98635	0.99012	0.526846	0.635596
ENSMUST00000155135.1	Prdx6	Prdx6-205	chr1:161243611-161251166	-	processed_transcript	12.88	35.5374	1	56.8676	49.41	35.534	16.4725	47.2705	2.86967	1.52089	0.0608601	0.138239
ENSMUST00000154927.1	Lif	Lif-203	chr11:4266796-4268249	+	processed_transcript	19.1503	1	1	26.7558	34.8054	4.48071	7.05009	22.014	3.12251	1.64271	0.241818	0.368616
ENSMUST00000223212.1	AC124484.1	AC124484.1-201	chr12:82000268-82000919	+	lincRNA	13.608	18.8977	17.1999	88.8304	68.8255	157.222	16.5685	104.959	6.33486	2.66331	0.0300097	0.0847472
ENSMUST00000197389.1	Tars2	Tars2-209	chr3:95745785-95748532	-	processed_transcript	10.4302	18.723	1	1	97.5775	434.052	10.0511	177.543	17.6641	4.14275	0.27128	0.401265
ENSMUST00000227485.1	CT025533.1	CT025533.1-201	chr14:54940355-54942852	+	antisense_RNA	1	10.9488	1	11.8339	1	200.123	4.31628	70.9858	16.4461	4.03967	0.361226	0.495064
ENSMUST00000136771.5	Capza2	Capza2-203	chr6:17637042-17656397	+	processed_transcript	2.4725	3.05876	19.1371	49.7949	38.9536	15.0606	8.22278	34.603	4.20819	2.0732	0.085749	0.176833
ENSMUST00000134242.1	Icmt	Icmt-203	chr4:152305387-152307068	+	processed_transcript	14.9071	1	1	49.0375	56.7832	1	5.6357	35.6069	6.3181	2.65949	0.17221	0.288333
ENSMUST00000185257.6	Tex264	Tex264-204	chr9:106659048-106685919	-	processed_transcript	59.3458	1.56683	1	84.9717	5.04055	40.2	20.6375	43.4041	2.10316	1.07256	0.492335	0.606747
ENSMUST00000145365.1	Fam110b	Fam110b-207	chr4:5798084-5798531	+	processed_transcript	11.5287	3.3717	3.88327	22.166	46.8869	26.6439	6.26123	31.8989	5.09467	2.34899	0.033371	0.0909265
ENSMUST00000145461.7	AI662270	AI662270-203	chr11:83223576-83225869	+	lincRNA	18.5905	1.01938	1	36.8403	60.4527	1.56092	6.86997	32.9513	4.79643	2.26196	0.222764	0.346598
ENSMUST00000133683.7	Rex1bd	Rex1bd-204	chr8:70504295-70506426	-	processed_transcript	165.833	64.3006	87.0676	396.344	506.791	847.543	105.734	583.559	5.51914	2.46444	0.0264881	0.0781307
ENSMUST00000195715.1	Rab33b	Rab33b-203	chr3:51483920-51494095	+	processed_transcript	11.4579	13.8945	23.3894	170.624	185.255	20.3476	16.2473	125.409	7.71879	2.94837	0.107662	0.208376
ENSMUST00000198522.1	5430416N02Rik	5430416N02Rik-204	chr5:100428994-100429515	-	lincRNA	10.1305	16.0988	7.59613	99.6602	25.0851	85.4594	11.2752	70.0682	6.21439	2.63561	0.0628937	0.141328
ENSMUST00000135536.7	Tmem104	Tmem104-203	chr11:115187511-115197403	+	processed_transcript	3.50588	11.4872	1.1904	9.82129	126.486	6.4368	5.39449	47.5812	8.82034	3.14083	0.346627	0.479491
ENSMUST00000136590.7	Arfgap1	Arfgap1-208	chr2:180967267-180982446	+	processed_transcript	1	23.1675	10.542	14.077	41.8174	67.546	11.5698	41.1468	3.55639	1.83041	0.151631	0.265526
ENSMUST00000217688.1	Apba3	Apba3-202	chr10:81269541-81271834	+	processed_transcript	5.06382	4.94885	3.60077	34.4701	15.7837	26.7145	4.53781	25.6561	5.65385	2.49923	0.0178161	0.0602803
ENSMUST00000152813.1	Spata5l1	Spata5l1-202	chr2:122630646-122632930	+	processed_transcript	141.036	166.358	12.944	378.316	419.917	305.745	106.779	367.993	3.4463	1.78505	0.010812	0.0440348
ENSMUST00000147926.7	Shb	Shb-206	chr4:45423278-45482802	-	processed_transcript	7.3661	6.09223	110.916	108.573	62.439	114.703	41.4581	95.2382	2.29722	1.19989	0.234448	0.360216
ENSMUST00000131524.7	Trnau1ap	Trnau1ap-206	chr4:132314350-132329482	-	processed_transcript	17.4116	58.1287	32.2658	148.072	156.674	219.114	35.9354	174.62	4.85928	2.28074	0.00543125	0.0295812
ENSMUST00000151182.1	Arid4b	Arid4b-209	chr13:14064055-14120219	+	processed_transcript	13.4922	1	17.352	20.3413	38.9663	45.1911	10.6147	34.8329	3.28157	1.71439	0.0537437	0.126583
ENSMUST00000147201.1	Retreg3	Retreg3-204	chr11:101098583-101119893	-	processed_transcript	11.4925	1	3.59734	52.3282	9.28182	12.9193	5.36328	24.8431	4.63208	2.21166	0.240345	0.367038
ENSMUST00000137725.1	Grsf1	Grsf1-205	chr5:88673708-88675199	-	processed_transcript	5.13664	3.06163	3.66747	8.46441	27.5689	37.4202	3.95525	24.4845	6.19038	2.63003	0.0736409	0.158278
ENSMUST00000141789.7	Setd4	Setd4-205	chr16:93590946-93597416	-	processed_transcript	3.01297	4.10245	5.18393	14.1454	26.1013	26.2051	4.09978	22.1506	5.40287	2.43373	0.0112004	0.0450699
ENSMUST00000223281.1	AC164424.2	AC164424.2-201	chr12:20615014-20664803	+	processed_transcript	1	23.7462	6.19668	12.6998	40.0247	43.6826	10.3143	32.1357	3.11565	1.63953	0.141986	0.254293
ENSMUST00000134157.1	Cldn12	Cldn12-205	chr5:5513222-5514449	-	processed_transcript	7.43293	16.1961	5.0752	26.6649	44.1496	73.8589	9.56807	48.2245	5.04015	2.33347	0.0527013	0.125004
ENSMUST00000225125.1	Lims2	Lims2-205	chr18:31955051-31957932	+	processed_transcript	12.7117	1	26.3039	42.9275	28.1735	38.6668	13.3385	36.5893	2.74313	1.45582	0.0525846	0.124904
ENSMUST00000153933.7	Eps8	Eps8-211	chr6:137527395-137649229	-	processed_transcript	1	32.1518	1	87.2851	49.2491	1	11.3839	45.8447	4.02715	2.00976	0.271509	0.401367
ENSMUST00000148746.1	Nfix	Nfix-208	chr8:84704712-84707716	-	processed_transcript	18.742	1	12.3799	1779.25	1	17.3636	10.7073	599.205	55.9623	5.80638	0.375043	0.504935
ENSMUST00000126989.7	Hspb6	Hspb6-203	chr7:30552178-30555440	+	processed_transcript	27.9521	35.5501	54.6227	4270.32	42.7088	39.4546	39.3749	1450.83	36.8465	5.20346	0.373388	0.506225
ENSMUST00000143684.1	Ecscr	Ecscr-206	chr18:35717515-35722293	-	processed_transcript	7.14732	48.512	13.8788	92.0421	62.2105	110.943	23.1794	88.3987	3.81368	1.93118	0.0269855	0.0791804
ENSMUST00000136426.1	Srebf1	Srebf1-205	chr11:60202659-60203488	-	processed_transcript	12.9315	15.9052	1	29.2235	29.6543	31.2782	9.94557	30.052	3.02165	1.59533	0.011934	0.0468983
ENSMUST00000172489.2	Tapbp	Tapbp-202	chr17:33920528-33926197	+	processed_transcript	15.2218	10.9557	21.8459	131.383	65.6536	55.395	16.0078	84.1438	5.25642	2.39408	0.0469959	0.115439
ENSMUST00000139722.1	Egfr	Egfr-205	chr11:16752230-16793744	+	processed_transcript	28.1923	4.43281	6.45705	48.2077	32.9989	66.5121	13.0274	49.2396	3.7797	1.91827	0.0423833	0.1073
ENSMUST00000135515.1	Mcrip1	Mcrip1-202	chr11:120542888-120549701	-	processed_transcript	71.9721	62.0501	58.5199	111.035	888.614	337.314	64.1807	445.654	6.94374	2.79571	0.173923	0.290045
ENSMUST00000150550.1	Abca2	Abca2-207	chr2:25441308-25442917	+	processed_transcript	23.1592	1	31.3316	38.9223	48.5647	48.3398	18.497	45.2756	2.44773	1.29145	0.0493682	0.119518
ENSMUST00000185645.1	Tex264	Tex264-205	chr9:106684929-106685903	-	processed_transcript	17.7236	30.811	1	69.3611	17.3743	56.4026	16.5115	47.7127	2.88966	1.5309	0.155336	0.269949
ENSMUST00000173095.1	Tmem229b	Tmem229b-203	chr12:78977770-79006663	-	processed_transcript	7.6932	1	3.94719	31.651	41.1734	2.87638	4.21346	25.2336	5.9888	2.58227	0.146122	0.258847
ENSMUST00000159006.1	Hotairm1	Hotairm1-203	chr6:52158524-52162020	+	antisense_RNA	6.18421	36.2221	6.68853	79.9314	35.5924	64.9677	16.365	60.1638	3.67638	1.87829	0.0555475	0.12974
ENSMUST00000174738.1	Gm20402	Gm20402-201	chr3:52268435-52269435	-	antisense_RNA	1	12.7354	8.62472	31.2521	26.966	15.6911	7.45338	24.6364	3.3054	1.72482	0.0409325	0.104626
ENSMUST00000097471.3	Pbx1	Pbx1-203	chr1:168158370-168164662	-	processed_transcript	1.15957	2.0681	3.95236	37.1638	30.1478	1	2.39335	22.7705	9.5141	3.25007	0.140353	0.251546
ENSMUST00000146020.1	Parvb	Parvb-204	chr15:84257140-84290434	+	processed_transcript	43.2967	3.85639	37.273	97.4027	58.0965	129.531	28.142	95.0102	3.3761	1.75536	0.0496456	0.120017
ENSMUST00000192365.1	Pmf1	Pmf1-203	chr3:88394379-88410265	-	processed_transcript	4.00814	4.94759	1	48.1667	1	46.2923	3.31857	31.8197	9.58836	3.26128	0.139127	0.249973
ENSMUST00000140960.2	Tbc1d1	Tbc1d1-206	chr5:64298530-64351481	+	processed_transcript	17.2136	1.24368	1.34586	63.2785	38.8307	1.29858	6.60103	34.4693	5.2218	2.38455	0.212172	0.334875
ENSMUST00000116172.1	Gm11175	Gm11175-201	chr8:70699538-70700080	-	antisense_RNA	78.2611	108.714	66.3073	369.188	449.408	371.527	84.4276	396.708	4.69879	2.23229	0.000434615	0.0104765
ENSMUST00000143607.1	Rnf130	Rnf130-203	chr11:50093674-50104758	+	processed_transcript	3.26816	75.3205	47.126	149.74	88.9259	94.246	41.9049	110.971	2.64816	1.40499	0.0731207	0.157765
ENSMUST00000123229.7	Rps6	Rps6-202	chr4:86855752-86857354	-	processed_transcript	127.961	173.061	121.068	2017.88	365.477	386.556	140.697	923.303	6.56237	2.71422	0.226143	0.35034
ENSMUST00000147334.1	Srpx	Srpx-204	chrX:10073621-10117676	-	processed_transcript	3.01322	12.4605	2.79776	114.717	14.7692	6.57665	6.09049	45.3544	7.44676	2.89661	0.323605	0.45757
ENSMUST00000225865.1	Zfp395	Zfp395-205	chr14:65358534-65386436	+	processed_transcript	18.4028	8.14546	6.39926	66.0442	30.5235	50.2067	10.9825	48.9248	4.45479	2.15536	0.025588	0.0764151
ENSMUST00000149701.1	Sh3bp5l	Sh3bp5l-204	chr11:58331043-58331509	+	processed_transcript	34.7448	34.0134	2.0387	115.584	118.886	18.3907	23.599	84.2868	3.57163	1.83658	0.155032	0.269886
ENSMUST00000132614.1	Fkbp1a	Fkbp1a-203	chr2:151545410-151560713	+	processed_transcript	40.893	49.7892	47.9783	567.055	30.7243	583.714	46.2201	393.831	8.52077	3.09098	0.128189	0.236044
ENSMUST00000182070.1	Nrgn	Nrgn-202	chr9:37544954-37546138	-	processed_transcript	19.3877	19.1446	1	43.5264	14.5231	60.8062	13.1774	39.6185	3.00655	1.58811	0.148802	0.262121
ENSMUST00000106779.3	Ddx5	Ddx5-203	chr11:106783312-106788467	-	processed_transcript	27.9002	41.431	51.4745	112.823	278.864	195.191	40.2686	195.626	4.85804	2.28037	0.0326267	0.0895768
ENSMUST00000208690.1	Ankrd39	Ankrd39-206	chr1:36541837-36547219	-	processed_transcript	8.97627	10.3283	15.2352	19.676	79.4056	92.4524	11.5133	63.8447	5.54532	2.47127	0.0804703	0.16871
ENSMUST00000213017.1	Aprt	Aprt-206	chr8:122575171-122576836	-	processed_transcript	20.4397	1	1	41.6404	1	50.0691	7.47989	30.9032	4.1315	2.04667	0.228182	0.352849
ENSMUST00000202928.1	Slc37a3	Slc37a3-213	chr6:39367667-39377639	-	processed_transcript	1	20.5318	1	43.9447	1	47.6185	7.51058	30.8544	4.10812	2.03848	0.225835	0.350187
ENSMUST00000127523.1	Itgb4	Itgb4-206	chr11:115990952-115991973	+	processed_transcript	1.65585	8.00981	17.442	18.8067	63.4204	18.6547	9.03588	33.6273	3.72152	1.89589	0.189764	0.309496
ENSMUST00000152753.7	Rab4b	Rab4b-207	chr7:27168695-27178888	-	processed_transcript	63.3397	6.68697	8.23651	22.9533	151.971	95.0254	26.0877	89.9832	3.44925	1.78628	0.200402	0.320515
ENSMUST00000153654.8	Tmem134	Tmem134-214	chr19:4125989-4127739	+	processed_transcript	1	109.558	1	133.166	1	77.4635	37.1859	70.5433	1.89704	0.923754	0.561119	0.667671
ENSMUST00000146117.7	Nagk	Nagk-206	chr6:83795208-83802334	+	processed_transcript	36.0535	55.8868	111.549	284.59	256.328	281.173	67.8298	274.03	4.03997	2.01434	0.00105551	0.0141804
ENSMUST00000127767.1	Aip	Aip-204	chr19:4118256-4124564	-	processed_transcript	35.5058	1	8.23372	25.2556	25.5188	40.8457	14.9132	30.54	2.04786	1.03412	0.252663	0.380657
ENSMUST00000134548.1	P3h1	P3h1-209	chr4:119246639-119248372	+	processed_transcript	1	1	1	1	1	88.3774	1	30.1258	30.1258	4.91293	0.373901	0.506102
ENSMUST00000147779.7	Ddx31	Ddx31-203	chr2:28840406-28847511	+	processed_transcript	1.62723	2.02529	52.047	53.7899	3.55096	78.3394	18.5665	45.2267	2.43593	1.28447	0.389593	0.518154
ENSMUST00000148471.8	Lig1	Lig1-208	chr7:13277283-13311425	+	processed_transcript	1	1	1	1	86.8284	1	1	29.6095	29.6095	4.88799	0.373901	0.505966
ENSMUST00000124987.1	Aldh4a1	Aldh4a1-202	chr4:139623109-139635591	+	processed_transcript	19.4087	1.89964	16.7193	33.0981	45.1799	35.69	12.6759	37.9893	2.99698	1.58351	0.0182267	0.0611767
ENSMUST00000133467.2	Gt(ROSA)26Sor	Gt(ROSA)26Sor-202	chr6:113067659-113077177	-	antisense_RNA	13.555	1	1	1	35.606	32.5063	5.185	23.0374	4.44309	2.15156	0.205489	0.326065
ENSMUST00000152142.7	Tmem107	Tmem107-208	chr11:69070854-69071503	+	processed_transcript	18.0856	6.63583	28.2249	43.7909	80.7541	81.6302	17.6488	68.7251	3.89404	1.96127	0.0215144	0.0679984
ENSMUST00000152755.7	Mapk7	Mapk7-213	chr11:61488812-61494266	-	processed_transcript	1	1	1	1	84.8771	1	1	28.959	28.959	4.85594	0.373901	0.505695
ENSMUST00000139378.1	H3f3b	H3f3b-203	chr11:116023509-116024473	-	processed_transcript	96.419	135.417	110.755	496.6	528.212	463.816	114.197	496.209	4.3452	2.11942	6.22892e-05	0.00682203
ENSMUST00000141558.1	Myh10	Myh10-207	chr11:68691559-68699259	+	processed_transcript	1	12.9581	25.5741	25.5373	24.197	45.0875	13.1774	31.6073	2.3986	1.26219	0.133	0.242774
ENSMUST00000140604.1	Ankrd13a	Ankrd13a-205	chr5:114774945-114806200	+	processed_transcript	1	1.01224	1	84.6136	1	1	1.00408	28.8712	28.7539	4.84568	0.373964	0.504291
ENSMUST00000152460.1	Telo2	Telo2-208	chr17:25099617-25103643	-	processed_transcript	1	1	1	1	1	82.7597	1	28.2532	28.2532	4.82034	0.373901	0.505831
ENSMUST00000150388.1	Gm28052	Gm28052-201	chr17:29549799-29674187	+	processed_transcript	1	1	1	81.8604	1	1	1	27.9535	27.9535	4.80496	0.373901	0.506238
ENSMUST00000174745.7	Rps18	Rps18-209	chr17:33951999-33955212	-	processed_transcript	52.4394	150.239	115.422	671.45	482.719	227.682	106.033	460.617	4.34407	2.11905	0.0545559	0.128017
ENSMUST00000146416.1	Rbm12b1	Rbm12b1-204	chr4:12140264-12144688	+	processed_transcript	36.7955	1	9.60029	11.6762	76.8094	31.7254	15.7986	40.0703	2.53632	1.34274	0.333278	0.467053
ENSMUST00000150503.3	Mical3	Mical3-206	chr6:120958343-121003152	-	processed_transcript	49.5474	187.642	11.1283	380.57	46.9109	461.328	82.7726	296.27	3.57932	1.83969	0.195966	0.316333
ENSMUST00000100834.1	Gm10399	Gm10399-201	chr5:117318745-117319242	-	antisense_RNA	28.1484	1	6.32818	27.6288	9.30097	54.3273	11.8255	30.419	2.57232	1.36307	0.296165	0.427408
ENSMUST00000125803.1	Pdcd2l	Pdcd2l-202	chr7:34192843-34196146	-	processed_transcript	17.7847	2.33165	7.72922	25.2678	51.4232	18.39	9.28186	31.6937	3.41458	1.77171	0.112074	0.21477
ENSMUST00000196305.1	Gm42596	Gm42596-201	chr5:110447989-110449946	+	antisense_RNA	9.77653	11.6948	4.47525	44.9029	35.5598	23.322	8.64884	34.5949	3.99994	1.99998	0.01718	0.0589598
ENSMUST00000150907.1	Inpp5e	Inpp5e-207	chr2:26399260-26400476	-	processed_transcript	39.658	28.3209	35.7381	159.067	128.728	141.94	34.5723	143.245	4.14335	2.0508	0.000318495	0.00943868
ENSMUST00000155474.1	Atp5g3	Atp5g3-205	chr2:73909318-73911291	-	processed_transcript	546.512	544.005	555.469	3095.59	1261.25	2980.64	548.662	2445.83	4.4578	2.15633	0.0329626	0.090302
ENSMUST00000133039.1	Trim47	Trim47-204	chr11:116107811-116127210	-	processed_transcript	13.2402	1	27.1962	16.6729	40.0812	37.8117	13.8121	31.5219	2.28219	1.19042	0.170777	0.28727
ENSMUST00000126024.1	Adam11	Adam11-204	chr11:102771482-102773661	+	processed_transcript	1.41033	14.934	13.7676	49.9262	74.3028	5.48409	10.0373	43.2377	4.3077	2.10692	0.182412	0.300227
ENSMUST00000139339.1	Sypl	Sypl-206	chr12:32965406-32969446	+	processed_transcript	29.4704	13.9421	1	18.4978	43.7835	35.3424	14.8042	32.5412	2.19811	1.13626	0.184967	0.303736
ENSMUST00000218666.1	CT030161.2	CT030161.2-201	chr12:80259443-80260557	+	antisense_RNA	10.155	36.4987	7.52289	45.504	50.7852	82.4026	18.0589	59.5639	3.29832	1.72173	0.0483622	0.117591
ENSMUST00000126751.1	Atp5b	Atp5b-206	chr10:128088552-128090273	+	processed_transcript	14.5275	22.527	2.76513	1804.04	18.4813	1.83697	13.2732	608.118	45.8154	5.51776	0.376176	0.505515
ENSMUST00000209861.1	Inppl1	Inppl1-206	chr7:101833789-101836965	-	processed_transcript	13.6686	38.0255	1	37.85	59.1896	15.5601	17.5647	37.5332	2.13685	1.09549	0.296189	0.42732
ENSMUST00000225560.1	Il3ra	Il3ra-206	chr14:14346440-14350213	+	processed_transcript	1	1	38.944	1	49.868	49.9846	13.648	33.6175	2.46318	1.30052	0.388044	0.516913
ENSMUST00000127423.1	Mtch1	Mtch1-203	chr17:29332114-29334005	-	processed_transcript	165.751	156.145	95.4422	601.031	644.538	406.491	139.113	550.687	3.95856	1.98498	0.00574731	0.0304149
ENSMUST00000170863.1	5031439G07Rik	5031439G07Rik-204	chr15:84955688-84988551	-	processed_transcript	11.4194	1	25.024	21.4501	33.3888	25.4129	12.4812	26.7506	2.14328	1.09982	0.140986	0.252591
ENSMUST00000052145.5	Bola2	Bola2-201	chr7:126695966-126696693	+	processed_transcript	41.2476	1	106.067	61.8736	71.423	62.7735	49.4383	65.3567	1.32199	0.402707	0.632069	0.729857
ENSMUST00000148909.1	Gpn2	Gpn2-203	chr4:133584428-133586181	+	processed_transcript	25.2163	19.712	52.2408	125.135	98.6998	133.012	32.3897	118.949	3.67242	1.87673	0.00390285	0.0248579
ENSMUST00000181063.1	Gm11960	Gm11960-202	chr11:4561780-4564637	+	processed_transcript	1	1	1	62.2844	1	1	1	21.4281	21.4281	4.42143	0.373901	0.505559
ENSMUST00000194395.5	Rcor3	Rcor3-212	chr1:192136397-192138010	-	processed_transcript	10.299	29.569	14.2677	62.0619	72.8371	59.4129	18.0452	64.7706	3.58935	1.84372	0.00285777	0.0216829
ENSMUST00000141953.7	Gprasp2	Gprasp2-207	chrX:135839106-135841733	+	processed_transcript	1	17.2829	7.82752	31.5566	21.5214	12.1843	8.70347	21.7541	2.49948	1.32163	0.149158	0.262381
ENSMUST00000182520.1	Gm26917	Gm26917-201	chr17:39845074-39846245	+	lincRNA	780.153	1171.99	694.897	3890.56	3422.85	2905.07	882.345	3406.16	3.86035	1.94873	0.0014022	0.0158038
ENSMUST00000145870.1	Ica1	Ica1-209	chr6:8630699-8647819	-	processed_transcript	16.758	7.73885	22.1837	59.1273	82.3212	35.9768	15.5602	59.1418	3.80084	1.92632	0.0359697	0.0955776
ENSMUST00000222721.1	2010111I01Rik	2010111I01Rik-221	chr13:63278959-63299282	+	processed_transcript	20.6137	772.765	23.5733	141.645	877.314	183.764	272.317	400.908	1.47221	0.557982	0.728774	0.806405
ENSMUST00000149809.7	Irak1	Irak1-221	chrX:74022238-74023727	-	processed_transcript	89.2958	152.571	73.2898	373.255	463.563	349.897	105.052	395.572	3.76547	1.91283	0.00234839	0.0202242
ENSMUST00000210692.1	Tmem143	Tmem143-209	chr7:45897423-45908210	+	processed_transcript	54.0921	42.2446	77.7825	244.199	261.822	165.502	58.0398	223.841	3.85668	1.94736	0.0061679	0.0316113
ENSMUST00000154300.7	Lgalsl	Lgalsl-204	chr11:20829312-20831056	-	processed_transcript	14.1233	20.5277	4.30363	65.1525	12.8196	88.0239	12.9849	55.332	4.26126	2.09128	0.13621	0.246313
ENSMUST00000137366.7	Fahd2a	Fahd2a-203	chr2:127436837-127444557	-	processed_transcript	14.097	25.0311	16.0726	91.6722	68.7362	52.9808	18.4002	71.1297	3.8657	1.95073	0.0108495	0.0441516
ENSMUST00000135456.1	Fbxw5	Fbxw5-206	chr2:25503038-25503800	+	processed_transcript	115.399	156.233	68.1079	376.648	440.049	427.366	113.247	414.688	3.66182	1.87256	0.000707255	0.0126353
ENSMUST00000166619.7	Rab40c	Rab40c-205	chr17:25882117-25913632	-	processed_transcript	1.4041	1.58845	1.12012	1.30495	85.2142	1.29476	1.37089	29.2713	21.3521	4.4163	0.374998	0.505009
ENSMUST00000192833.1	Gm26917	Gm26917-202	chr17:39843013-39846341	+	lincRNA	81840	104574	76494.3	387464	314137	309923	87636.1	337175	3.84744	1.9439	0.000719875	0.0127254
ENSMUST00000221914.1	Btbd7	Btbd7-204	chr12:102877678-102878269	-	processed_transcript	10.299	23.4976	19.2614	55.9451	67.2637	70.3945	17.686	64.5344	3.6489	1.86746	0.00133164	0.0154581
ENSMUST00000140985.1	Abcc3	Abcc3-203	chr11:94343655-94351186	-	processed_transcript	1.28766	9.70428	11.4843	28.8382	43.0287	6.56689	7.49207	26.1446	3.48964	1.80308	0.167204	0.283342
ENSMUST00000173308.1	Esrra	Esrra-204	chr19:6912765-6921813	-	processed_transcript	110.26	119.772	78.6418	275.56	544.681	389.836	102.891	403.359	3.92025	1.97095	0.0190221	0.0626772
ENSMUST00000138189.1	Srp14	Srp14-203	chr2:118475861-118479648	-	processed_transcript	15.4558	25.1007	7.0082	89.2052	32.7959	52.2281	15.8549	58.0764	3.663	1.87302	0.0717124	0.15566
ENSMUST00000191719.5	Gm16432	Gm16432-202	chr1:177983423-178149962	+	processed_transcript	5.84841	4.06096	4.96654	42.0582	12.4488	12.5087	4.95864	22.3386	4.50498	2.17152	0.153165	0.26719
ENSMUST00000189045.1	5031425E22Rik	5031425E22Rik-204	chr5:23432287-23434269	-	lincRNA	121.835	190.291	116.785	575.474	453.18	573.25	142.97	533.968	3.73482	1.90104	0.00112587	0.0145814
ENSMUST00000140267.8	Tmem134	Tmem134-208	chr19:4125959-4131727	+	processed_transcript	34.3391	1.69171	45.1965	197.857	12.4548	58.4587	27.0758	89.5901	3.30886	1.72634	0.336222	0.469742
ENSMUST00000132944.7	Amdhd2	Amdhd2-205	chr17:24155833-24156739	-	processed_transcript	20.9274	25.4033	18.3966	103.806	69.1113	73.4888	21.5758	82.1352	3.80683	1.92859	0.00548418	0.0296452
ENSMUST00000215590.1	Exosc7	Exosc7-206	chr9:123113247-123130855	+	processed_transcript	1	1	32.8192	35.0228	1	50.1732	11.6064	28.732	2.47553	1.30774	0.395193	0.523117
ENSMUST00000135137.1	Slc11a1	Slc11a1-206	chr1:74375572-74376890	+	processed_transcript	14.6747	18.3228	9.91001	133.955	66.7851	15.8466	14.3025	72.1957	5.04777	2.33565	0.166606	0.282898
ENSMUST00000131052.7	Mrto4	Mrto4-205	chr4:139347435-139349603	-	processed_transcript	127.33	7.25597	1	62.9625	8.43333	90.2942	45.1954	53.8967	1.19252	0.254019	0.863936	0.907529
ENSMUST00000133192.1	Mrpl58	Mrpl58-206	chr11:115403777-115410759	+	processed_transcript	13.7852	1	20.6187	23.9677	20.3746	30.1951	11.8013	24.8458	2.10534	1.07406	0.112201	0.21493
ENSMUST00000171950.7	Camk2d	Camk2d-222	chr3:126778740-126810648	+	processed_transcript	17.5034	1	19.1633	23.2445	36.5925	19.978	12.5556	26.605	2.11898	1.08337	0.142494	0.254659
ENSMUST00000221614.1	D130020L05Rik	D130020L05Rik-204	chr12:101083678-101088183	+	antisense_RNA	22.713	1	16.5389	17.5029	27.6276	39.2848	13.4173	28.1384	2.09717	1.06845	0.177934	0.294587
ENSMUST00000152415.1	Olfm1	Olfm1-205	chr2:28192992-28214425	+	processed_transcript	4.6967	9.25163	6.78636	64.6043	13.1307	17.0866	6.91156	31.6072	4.57309	2.19317	0.210832	0.333283
ENSMUST00000212278.1	Tom1	Tom1-205	chr8:75060314-75069503	+	processed_transcript	39.2921	59.6633	20.5899	247.15	117.095	81.7755	39.8485	148.673	3.73097	1.89955	0.102289	0.200596
ENSMUST00000137210.1	Pcolce	Pcolce-207	chr5:137608939-137611326	-	processed_transcript	12.0712	23.8973	15.1472	114.763	23.9806	77.5658	17.0385	72.1031	4.23177	2.08126	0.107083	0.207494
ENSMUST00000137535.1	Gm12473	Gm12473-201	chr4:43631539-43641533	-	antisense_RNA	23.3933	25.6421	1	36.5621	24.2526	32.4589	16.6785	31.0912	1.86415	0.898518	0.171329	0.287432
ENSMUST00000149016.7	Gnas	Gnas-219	chr2:174327730-174328947	+	processed_transcript	29.1403	23.6495	95.9488	305.417	112.341	90.9327	49.5795	169.564	3.42004	1.77401	0.17122	0.287535
ENSMUST00000221161.1	Ift43	Ift43-203	chr12:86092122-86161512	+	processed_transcript	7.2335	15.7262	23.8055	86.8457	53.2588	27.1606	15.5884	55.755	3.5767	1.83863	0.0885424	0.180598
ENSMUST00000131477.1	Tbrg4	Tbrg4-203	chr11:6619556-6620915	-	processed_transcript	82.3239	81.7396	1.64977	59.5057	76.8087	112.541	55.2377	82.9518	1.50172	0.58662	0.422022	0.545165
ENSMUST00000176134.1	5430405H02Rik	5430405H02Rik-202	chr2:156852430-156862945	-	antisense_RNA	37.6882	1	28.9047	6.47577	94.133	82.2141	22.531	60.941	2.70476	1.4355	0.264099	0.393067
ENSMUST00000143073.7	Ccdc107	Ccdc107-206	chr4:43492900-43494205	+	processed_transcript	755.507	713.898	703.176	2982.05	2451.51	2381.13	724.194	2604.9	3.59696	1.84678	0.00058871	0.0119594
ENSMUST00000174466.1	Znrd1	Znrd1-204	chr17:36954443-36958559	-	processed_transcript	14.0872	24.0792	1	153.435	1	99.1116	13.0554	84.5155	6.47358	2.69456	0.188284	0.307779
ENSMUST00000153387.5	Ppa2	Ppa2-206	chr3:133310482-133370447	+	processed_transcript	3.83979	4.37873	6.56005	12.9163	89.9291	4.22572	4.92619	35.6904	7.24502	2.85699	0.322003	0.45556
ENSMUST00000144733.1	Acot7	Acot7-205	chr4:152199868-152217876	+	processed_transcript	1	25.1054	9.15604	23.789	25.1061	16.8851	11.7538	21.9267	1.8655	0.899561	0.247741	0.375599
ENSMUST00000128607.1	Mecr	Mecr-204	chr4:131864778-131867776	+	processed_transcript	6.52107	32.164	51.8303	73.9701	82.0869	77.6593	30.1718	77.9054	2.58206	1.36852	0.0231248	0.0711251
ENSMUST00000132276.1	Gpsm1	Gpsm1-207	chr2:26339448-26344724	+	processed_transcript	518.862	683.235	495.041	2289.95	2072.94	1597.7	565.713	1986.86	3.51214	1.81235	0.00261361	0.021272
ENSMUST00000139915.1	Tnks1bp1	Tnks1bp1-204	chr2:85048022-85052134	+	processed_transcript	26.205	15.5131	12.9477	63.9802	77.5322	45.1024	18.2219	62.205	3.41374	1.77135	0.0127043	0.0489329
ENSMUST00000165246.1	Mrps12	Mrps12-203	chr7:28739641-28740067	-	processed_transcript	25.7084	1	1	1	40.232	27.0801	9.23614	22.7707	2.46539	1.30182	0.393535	0.521744
ENSMUST00000122930.1	Rasgrp2	Rasgrp2-209	chr19:6401695-6402446	+	processed_transcript	36.8891	9.19125	68.3468	74.088	99.1302	133.487	38.1424	102.235	2.68035	1.42242	0.0574507	0.133074
ENSMUST00000177538.1	Usp16	Usp16-211	chr16:87455049-87466346	+	processed_transcript	41.3939	33.9786	32.7076	135.673	109.811	130.56	36.0267	125.348	3.47931	1.7988	0.000434407	0.0105218
ENSMUST00000226535.1	Dopey2	Dopey2-205	chr16:93773907-93798948	+	processed_transcript	21.0347	1.30769	23.7427	31.3388	22.1953	39.6767	15.3617	31.0703	2.02258	1.01619	0.144858	0.257787
ENSMUST00000214885.1	Tex264	Tex264-210	chr9:106662376-106685302	-	processed_transcript	19.3031	25.3504	1	24.0155	27.9181	30.2978	15.2178	27.4105	1.80121	0.848964	0.181433	0.299006
ENSMUST00000129001.7	Ankrd13a	Ankrd13a-202	chr5:114795743-114806200	+	processed_transcript	39.1115	2.523	2.6985	78.0969	1	137.419	14.7777	72.172	4.88386	2.28802	0.237195	0.36355
ENSMUST00000189370.1	Dsel	Dsel-203	chr1:111864095-111864880	-	processed_transcript	78.4295	87.2531	67.2906	272.194	265.488	254.76	77.6577	264.147	3.40143	1.76614	1.71525e-05	0.00508318
ENSMUST00000137113.1	Ccdc107	Ccdc107-204	chr4:43493417-43495871	+	processed_transcript	10.3395	34.0389	2.98745	22.3537	71.7709	26.1273	15.7886	40.084	2.53879	1.34414	0.258022	0.386075
ENSMUST00000133240.7	Aarsd1	Aarsd1-203	chr11:101410808-101417384	-	processed_transcript	27.0308	11.9255	10.4089	89.0474	17.9349	82.2537	16.4551	63.0786	3.83339	1.93862	0.115641	0.219848
ENSMUST00000130178.1	Fam78a	Fam78a-202	chr2:32069420-32079352	-	processed_transcript	7.13223	6.15561	11.8132	14.5487	27.6299	49.9543	8.36703	30.711	3.67047	1.87597	0.100036	0.197253
ENSMUST00000147762.7	Snhg15	Snhg15-204	chr11:6525591-6528760	-	processed_transcript	74.7607	19.2249	1.6891	53.5649	16.3282	105.528	31.8915	58.4738	1.83352	0.874616	0.477673	0.593616
ENSMUST00000207039.1	Homer2	Homer2-203	chr7:81618708-81706786	-	processed_transcript	1	17.8091	16.0125	34.2694	19.8699	15.5928	11.6072	23.244	2.00255	1.00184	0.208387	0.330039
ENSMUST00000225722.1	Nudt13	Nudt13-215	chr14:20294714-20317575	+	processed_transcript	214.514	5.47664	4.36835	45.4939	36.4107	113.978	74.7863	65.2942	0.873077	-0.19582	0.904163	0.933246
ENSMUST00000087655.5	Tnfaip8	Tnfaip8-201	chr18:49979491-50051320	+	processed_transcript	144.791	1	1	9.37708	23.8902	23.6113	48.9304	18.9595	0.387479	-1.36781	0.567522	0.67354
ENSMUST00000141094.7	Itga4	Itga4-204	chr2:79255572-79273986	+	processed_transcript	17.9911	21.4923	19.4006	76.2714	46.5343	77.1968	19.628	66.6675	3.39655	1.76407	0.00967927	0.0412208
ENSMUST00000143344.1	Mlx	Mlx-204	chr11:101089662-101091518	+	processed_transcript	6.99086	14.4086	7.72181	43.0687	38.4697	16.666	9.7071	32.7348	3.37225	1.75371	0.0532058	0.125786
ENSMUST00000160229.1	Zmiz1	Zmiz1-204	chr14:25607838-25645735	+	processed_transcript	54.3391	52.7234	63.4801	203.165	190.955	165.586	56.8475	186.569	3.28191	1.71454	0.000359536	0.00968632
ENSMUST00000130510.1	Lcp1	Lcp1-205	chr14:75197900-75199366	+	processed_transcript	18.9679	1.38598	12.8052	15.5768	34.6	21.9056	11.053	24.0275	2.17384	1.12024	0.163123	0.278581
ENSMUST00000166166.7	Cnot2	Cnot2-207	chr10:116499374-116581485	-	processed_transcript	1	1	28.4562	62.2229	15.9027	1	10.1521	26.3752	2.59801	1.37741	0.474613	0.591125
ENSMUST00000212386.1	Bst2	Bst2-202	chr8:71535805-71537331	-	processed_transcript	63.1067	62.357	18.4589	104.55	158.359	152.352	47.9742	138.42	2.88531	1.52872	0.0159395	0.0567917
ENSMUST00000156967.7	Mapkap1	Mapkap1-211	chr2:34406872-34478768	+	processed_transcript	97.9433	194.378	18.0867	226.185	297.913	176.144	103.469	233.414	2.25588	1.17369	0.104207	0.203407
ENSMUST00000151145.7	Sh3glb2	Sh3glb2-212	chr2:30349483-30359245	-	processed_transcript	12.5224	1	37.8411	6.88437	81.0718	29.0792	17.1212	39.0118	2.27857	1.18813	0.422606	0.545361
ENSMUST00000123477.1	Zbtb17	Zbtb17-202	chr4:141464818-141466068	+	processed_transcript	32.0024	39.1514	1	44.8944	20.1756	47.1411	24.0513	37.4037	1.55516	0.637067	0.410727	0.535796
ENSMUST00000176883.1	Zfpm1	Zfpm1-203	chr8:122307320-122323775	+	processed_transcript	7.72772	5.10409	12.8667	23.7028	29.6744	24.5789	8.56616	25.9854	3.03349	1.60098	0.00408278	0.0255199
ENSMUST00000200983.3	Eif2b4	Eif2b4-208	chr5:31191200-31193139	-	processed_transcript	20.2137	1	75.7634	37.2069	43.894	31.6534	32.3257	37.5848	1.16269	0.217467	0.828109	0.884651
ENSMUST00000198763.1	Pfkfb4	Pfkfb4-205	chr9:109017380-109032197	+	processed_transcript	33.0216	79.2522	3.32153	72.2107	59.4348	67.8376	38.5318	66.4943	1.7257	0.787183	0.280128	0.410139
ENSMUST00000150556.1	Ptpmt1	Ptpmt1-204	chr2:90914038-90917669	-	processed_transcript	111.179	159.76	175.961	516.627	447.637	450.539	148.967	471.601	3.16581	1.66257	0.000411431	0.0103639
ENSMUST00000134173.7	Kctd10	Kctd10-205	chr5:114365706-114372142	-	processed_transcript	20.1602	7.13655	22.0366	158.469	29.1401	22.7155	16.4444	70.1081	4.26333	2.09198	0.293986	0.42536
ENSMUST00000002490.6	Ndufb2	Ndufb2-201	chr6:39592585-39599422	+	processed_transcript	102.753	75.1277	60.2825	233.704	262.413	250.61	79.3878	248.909	3.13536	1.64863	0.000347118	0.00971544
ENSMUST00000127707.1	Eif4g3	Eif4g3-206	chr4:137993476-137994150	+	processed_transcript	8.27073	12.8045	13.9741	27.1734	46.0125	38.7119	11.6831	37.2993	3.19259	1.67473	0.0112253	0.0451343
ENSMUST00000138071.1	Wsb2	Wsb2-205	chr5:117361022-117370922	+	processed_transcript	76.0088	38.4971	115.049	244.789	217.517	204.355	76.5184	222.22	2.90414	1.53811	0.00438357	0.0261354
ENSMUST00000123309.1	Cdh23	Cdh23-206	chr10:60657266-60687257	-	processed_transcript	7.09123	21.8896	10.142	28.8708	115.875	15.1375	13.0409	53.2943	4.08669	2.03093	0.275068	0.40461
ENSMUST00000144308.7	Zfp384	Zfp384-213	chr6:125009276-125031904	+	processed_transcript	25.2681	25.068	24.441	136.169	78.2336	45.7758	24.9257	86.726	3.47938	1.79883	0.0795953	0.167433
ENSMUST00000227163.1	Sdr39u1	Sdr39u1-208	chr14:55897835-55900184	-	processed_transcript	7.32895	8.82059	15.1705	28.4673	41.2506	26.2013	10.44	31.9731	3.06255	1.61473	0.014982	0.05438
ENSMUST00000128463.7	Reck	Reck-202	chr4:43875530-43944745	+	processed_transcript	1.97582	1	1.03757	64.1893	1	1	1.3378	22.0631	16.4921	4.04371	0.380891	0.510217
ENSMUST00000131555.7	Zfp384	Zfp384-209	chr6:125009713-125024767	+	processed_transcript	54.2625	1	1.34706	1	78.0855	29.2626	18.8699	36.116	1.91395	0.936556	0.579495	0.684203
ENSMUST00000159407.2	Gm15867	Gm15867-201	chr1:192854923-192856246	+	antisense_RNA	25.7849	37.6484	9.89919	84.6128	57.2631	61.3474	24.4442	67.7411	2.77126	1.47054	0.020894	0.0665806
ENSMUST00000156230.1	Tmem104	Tmem104-204	chr11:115187551-115245764	+	processed_transcript	74.9661	1	1	50.6409	1	45.6747	25.6554	32.4385	1.26439	0.338447	0.82814	0.884496
ENSMUST00000155968.7	Ube4b	Ube4b-208	chr4:149329499-149331832	-	processed_transcript	54.7971	40.3694	59.6852	101.485	254.99	157.107	51.6172	171.194	3.3166	1.7297	0.0573994	0.133078
ENSMUST00000147963.7	Mindy1	Mindy1-208	chr3:95281487-95283516	+	processed_transcript	42.5816	1	1	62.0615	11.6425	1.81159	14.8605	25.1719	1.69388	0.760327	0.680287	0.768623
ENSMUST00000132274.7	Rsad1	Rsad1-202	chr11:94539798-94549255	-	processed_transcript	1.28274	2.55028	3.04389	1.05755	3.4811	82.8368	2.2923	29.1252	12.7056	3.6674	0.374496	0.504738
ENSMUST00000202431.3	Mlxipl	Mlxipl-210	chr5:135089890-135121786	+	processed_transcript	9.22433	1	10.5939	57.0467	1	52.4401	6.9394	36.8289	5.30723	2.40796	0.176097	0.292605
ENSMUST00000211380.1	Gm11175	Gm11175-202	chr8:70699162-70699689	-	antisense_RNA	57.9052	88.4567	57.2854	211.734	222.62	189.769	67.8824	208.041	3.06472	1.61576	0.000577347	0.0120692
ENSMUST00000141343.1	Gnptab	Gnptab-205	chr10:88433361-88440862	+	processed_transcript	4.11179	1	4.48059	1.44401	173.067	2.24424	3.19746	58.9184	18.4266	4.20372	0.384286	0.513809
ENSMUST00000217664.1	Cabin1	Cabin1-202	chr10:75657796-75668094	-	processed_transcript	24.9296	12.2796	6.84407	26.6821	48.9247	46.7993	14.6844	40.802	2.7786	1.47436	0.0423929	0.10727
ENSMUST00000209470.1	Saraf	Saraf-202	chr8:34154575-34155413	+	processed_transcript	12.2084	20.3404	19.3584	59.0795	230.197	10.2986	17.3024	99.8585	5.77136	2.52891	0.283646	0.413247
ENSMUST00000147554.1	Trp53bp1	Trp53bp1-217	chr2:121199639-121204981	-	processed_transcript	1	27.7415	28.7068	19.4613	52.9341	22.4064	19.1494	31.6006	1.65021	0.72265	0.425065	0.547412
ENSMUST00000189156.1	Gm19412	Gm19412-202	chr17:33919574-33920289	-	antisense_RNA	21.0978	1	14.9061	28.567	20.8069	15.3346	12.3346	21.5695	1.74869	0.806278	0.261793	0.390442
ENSMUST00000214491.1	Plcd1	Plcd1-204	chr9:119072579-119074303	-	processed_transcript	19.1657	47.2283	34.9116	117.569	75.7344	102.527	33.7685	98.6102	2.92018	1.54606	0.0115495	0.0458523
ENSMUST00000200622.1	2810403A07Rik	2810403A07Rik-210	chr3:88708780-88711084	+	processed_transcript	5.88884	6.597	7.37738	35.3373	7.13941	32.5361	6.62108	25.0043	3.77647	1.91704	0.110028	0.211734
ENSMUST00000161839.1	Hes1	Hes1-204	chr16:30066338-30067319	+	processed_transcript	83.6677	65.3506	81.4144	316.335	358.799	111.818	76.8109	262.317	3.4151	1.77193	0.0722766	0.156682
ENSMUST00000160225.1	Zfp579	Zfp579-203	chr7:4992852-4996158	-	processed_transcript	72.3478	10.9135	1	41.0935	7.72452	70.6865	28.0871	39.8348	1.41826	0.504124	0.704105	0.786886
ENSMUST00000149902.1	Armcx2	Armcx2-205	chrX:134807887-134808961	-	processed_transcript	13.6232	4.70937	8.49194	23.0735	29.9604	22.358	8.94151	25.1307	2.81056	1.49086	0.0102567	0.0425995
ENSMUST00000125914.1	Ubl4a	Ubl4a-202	chrX:74367797-74368503	-	processed_transcript	11.942	1	34.8651	12.7727	46.0795	19.6325	15.9357	26.1616	1.6417	0.715187	0.512284	0.623854
ENSMUST00000139134.1	Mib2	Mib2-204	chr4:155655838-155656727	-	processed_transcript	21.5799	78.4986	43.2684	131.522	98.4469	156.737	47.7823	128.902	2.69769	1.43173	0.0265811	0.0782675
ENSMUST00000218874.1	Actn1	Actn1-204	chr12:80183466-80259890	-	processed_transcript	145.383	293.583	2.44856	37.6575	192.793	396.717	147.138	209.056	1.42081	0.506717	0.667345	0.759965
ENSMUST00000173249.1	Gm20412	Gm20412-201	chr2:158117154-158117905	+	processed_transcript	8.87927	3.45831	21.9117	37.0477	14.5189	34.4513	11.4164	28.6726	2.51152	1.32856	0.127016	0.23457
ENSMUST00000127920.1	5031425F14Rik	5031425F14Rik-201	chr2:166447451-166459232	+	lincRNA	15.9639	16.7293	5.7073	46.2636	27.6159	32.7159	12.8002	35.5318	2.77588	1.47294	0.0262184	0.0776989
ENSMUST00000151044.1	Itsn1	Itsn1-223	chr16:91816826-91827897	+	processed_transcript	90.4544	63.2941	99.0753	489.559	143.015	221.465	84.2746	284.68	3.37801	1.75617	0.130209	0.238978
ENSMUST00000137552.7	Fscn1	Fscn1-204	chr5:142963250-142971953	+	processed_transcript	20.3708	6.66675	6.20074	26.4021	35.2497	24.7013	11.0794	28.7844	2.598	1.3774	0.0356759	0.0951483
ENSMUST00000124415.1	Myh7b	Myh7b-202	chr2:155629060-155630384	+	processed_transcript	52.5165	94.4709	46.998	57.3087	356.128	306.784	64.6618	240.074	3.71276	1.89249	0.134488	0.243987
ENSMUST00000142970.1	Plcd3	Plcd3-204	chr11:103081730-103101591	-	processed_transcript	5.19486	6.68242	29.0336	24.2735	37.9891	29.3158	13.637	30.5261	2.23848	1.16252	0.12383	0.230205
ENSMUST00000122989.1	Strada	Strada-204	chr11:106163330-106202168	-	processed_transcript	11.8605	1	12.1791	1	49.1288	78.8537	8.34653	42.9942	5.15114	2.36489	0.206084	0.326803
ENSMUST00000134454.1	Fastkd2	Fastkd2-205	chr1:63751221-63752465	+	processed_transcript	25.7418	16.3904	10.7818	82.9584	42.6461	33.7014	17.638	53.102	3.01066	1.59008	0.0877	0.179242
ENSMUST00000151379.1	Tpra1	Tpra1-212	chr6:88905955-88907760	+	processed_transcript	33.5039	21.9393	1	31.5448	33.6926	18.076	18.8144	27.7711	1.47606	0.56175	0.449418	0.568601
ENSMUST00000134735.1	Itga2b	Itga2b-207	chr11:102453304-102456190	-	processed_transcript	1.92916	19.7234	36.0273	37.5767	41.665	22.3914	19.2266	33.8777	1.76202	0.81723	0.270226	0.400058
ENSMUST00000129013.1	Bud23	Bud23-204	chr5:135063737-135064079	-	processed_transcript	81.5828	10.3954	1.17695	29.3107	28.781	30.1692	31.0517	29.4203	0.947462	-0.0778598	0.951887	0.966271
ENSMUST00000175937.1	Wbp1l	Wbp1l-206	chr19:46599124-46644555	+	processed_transcript	38.6828	26.1691	99.4084	181.57	175.683	79.6393	54.7534	145.631	2.65976	1.4113	0.0857574	0.176778
ENSMUST00000098007.10	Inpp5f	Inpp5f-202	chr7:128611328-128671622	+	processed_transcript	8.49648	3.11144	14.6478	43.8498	5.3871	41.2974	8.75191	30.1781	3.44818	1.78583	0.170938	0.287445
ENSMUST00000137339.1	Igfbp5	Igfbp5-202	chr1:72858065-72874275	-	processed_transcript	89.1371	82.7013	125.157	326.56	248.624	279.748	98.9985	284.977	2.8786	1.52537	0.00208645	0.0188042
ENSMUST00000126224.1	Rab14	Rab14-203	chr2:35199874-35200978	-	processed_transcript	44.282	20.6364	14.6298	173.831	37.0929	50.1248	26.5161	87.0163	3.28165	1.71442	0.245565	0.373313
ENSMUST00000216194.1	Dse	Dse-203	chr10:34184135-34207077	-	processed_transcript	10.5835	7.16082	19.1318	72.2007	14.4496	33.5127	12.292	40.0544	3.25856	1.70423	0.184982	0.303663
ENSMUST00000139980.7	Jpt1	Jpt1-202	chr11:115498032-115514148	-	processed_transcript	55.438	68.6174	27.9068	194.428	53.9976	241.566	50.6541	163.33	3.22443	1.68904	0.122073	0.228797
ENSMUST00000144309.1	AU022252	AU022252-204	chr4:119226472-119232685	-	processed_transcript	1	30.8556	14.5424	40.527	11.7686	22.1132	15.466	24.8029	1.60371	0.68141	0.481712	0.597309
ENSMUST00000021079.13	Mrpl58	Mrpl58-201	chr11:115403822-115410724	+	processed_transcript	19.1331	43.6052	26.4818	81.1374	69.1629	91.6601	29.74	80.6535	2.71195	1.43933	0.00638712	0.0322751
ENSMUST00000152375.1	Gm13563	Gm13563-203	chr2:26385552-26387794	+	antisense_RNA	8.58742	5.12767	6.97262	10.5748	47.896	14.0335	6.8959	24.1681	3.5047	1.80929	0.221803	0.345422
ENSMUST00000196936.1	Mepce	Mepce-205	chr5:137784886-137786691	-	processed_transcript	37.3866	17.246	1	36.6984	27.3826	14.7603	18.5442	26.2804	1.41718	0.503021	0.56335	0.669692
ENSMUST00000129711.1	Aurkaip1	Aurkaip1-204	chr4:155831665-155832529	+	processed_transcript	1	26.223	13.2705	11.2905	18.5625	37.9619	13.4978	22.605	1.67471	0.743912	0.44612	0.566705
ENSMUST00000148082.1	Gm16599	Gm16599-201	chr5:136274996-136417894	+	antisense_RNA	7.58192	19.4424	8.12578	44.1728	28.6988	21.0608	11.7167	31.3108	2.67232	1.4181	0.0663848	0.147074
ENSMUST00000148127.1	Ndufaf6	Ndufaf6-206	chr4:11070254-11076205	-	processed_transcript	5.77584	3.71822	15.3672	26.43	33.8609	8.20967	8.2871	22.8335	2.75531	1.46222	0.159251	0.274199
ENSMUST00000152880.1	Tab3	Tab3-204	chrX:85574039-85575625	+	processed_transcript	30.2359	42.6	24.5116	61.4025	103.771	110.133	32.4491	91.7688	2.82808	1.49982	0.0215413	0.0679983
ENSMUST00000171248.1	Gm17110	Gm17110-201	chr14:34501715-34502684	+	antisense_RNA	18.9035	39.7064	26.9274	99.3979	63.167	71.4859	28.5124	78.017	2.73624	1.4522	0.0167602	0.0581127
ENSMUST00000220384.1	Smarcc2	Smarcc2-206	chr10:128459656-128468868	+	processed_transcript	41.9909	15.1411	22.0444	69.8726	96.6659	46.081	26.3922	70.8732	2.68539	1.42513	0.0560148	0.130529
ENSMUST00000134922.7	Tm9sf4	Tm9sf4-202	chr2:153194341-153203902	+	processed_transcript	2.40403	2.1026	24.2951	1.73917	42.863	36.4881	9.60056	27.0301	2.81547	1.49337	0.302524	0.434592
ENSMUST00000163208.1	Gm12905	Gm12905-202	chr4:123905230-123905508	-	antisense_RNA	43.5553	41.2247	6.73247	56.3211	47.7413	98.0604	30.5041	67.3743	2.20869	1.14319	0.132772	0.242533
ENSMUST00000155437.1	Itga9	Itga9-206	chr9:118872069-118897312	+	processed_transcript	11.422	16.392	11.8369	45.0678	38.3281	27.9686	13.217	37.1215	2.80862	1.48986	0.0101978	0.04239
ENSMUST00000137619.1	Mrpl12	Mrpl12-202	chr11:120485027-120488457	+	processed_transcript	32.1422	25.3358	13.1883	64.4776	49.892	72.1946	23.5554	62.188	2.64007	1.40058	0.0107691	0.0439309
ENSMUST00000130929.7	Tubgcp4	Tubgcp4-205	chr2:121171246-121175918	+	processed_transcript	5.53156	1.0021	5.17517	206.489	2.95882	1.00306	3.90294	70.1504	17.9737	4.16782	0.386289	0.515803
ENSMUST00000133996.1	Ugcg	Ugcg-203	chr4:59189558-59212203	+	processed_transcript	38.9829	8.16799	33.8237	119.367	67.5603	28.5106	26.9915	71.8128	2.66057	1.41173	0.184514	0.303289
ENSMUST00000218816.1	Sypl	Sypl-207	chr12:32965397-32975714	+	processed_transcript	10.4598	1.47028	22.9334	84.3203	64.8864	1.36942	11.6211	50.192	4.31903	2.11071	0.209364	0.331378
ENSMUST00000133394.7	Bgn	Bgn-203	chrX:73483602-73492746	+	processed_transcript	89.0393	63.1639	49.7186	244.34	172.498	138.653	67.3073	185.164	2.75102	1.45997	0.0238633	0.0726865
ENSMUST00000125422.7	Zc3h15	Zc3h15-202	chr2:83644623-83660183	+	processed_transcript	43.01	1	41.5745	201.737	184.931	1	28.5282	129.223	4.52965	2.1794	0.200424	0.32045
ENSMUST00000190395.1	Chrm3	Chrm3-203	chr13:10215694-10360563	-	processed_transcript	2.97574	6.01632	1	65.0702	1	5.71626	3.33069	23.9288	7.18435	2.84486	0.375339	0.505199
ENSMUST00000201387.1	Tbc1d19	Tbc1d19-203	chr5:53836647-53849934	+	processed_transcript	19.2448	13.6447	9.96016	27.2559	52.165	37.9666	14.2832	39.1292	2.73952	1.45392	0.0321065	0.0887774
ENSMUST00000188892.6	Tex264	Tex264-207	chr9:106659237-106685927	-	processed_transcript	102.882	82.0385	17.8032	143.079	170.668	125.55	67.5745	146.433	2.16698	1.11569	0.0518737	0.123858
ENSMUST00000129575.7	Slc38a10	Slc38a10-207	chr11:120105792-120110446	-	processed_transcript	36.6462	52.3569	33.8458	96.1434	218.575	61.2	40.9496	125.306	3.06001	1.61354	0.154068	0.268394
ENSMUST00000135787.1	Aco1	Aco1-202	chr4:40190530-40196404	+	processed_transcript	13.8929	21.0493	10.0216	31.9622	75.7459	23.9338	14.9879	43.8806	2.92773	1.54978	0.153309	0.26735
ENSMUST00000160122.1	Man2c1	Man2c1-210	chr9:57130777-57131253	+	processed_transcript	15.5919	11.651	9.04453	30.9047	62.8908	16.7107	12.0958	36.8354	3.04531	1.60659	0.147232	0.259901
ENSMUST00000148780.1	Rnf166	Rnf166-203	chr8:122468009-122475688	-	processed_transcript	29.3421	33.3129	6.59786	54.0838	44.6236	52.4685	23.0843	50.392	2.18295	1.12628	0.0363639	0.0962697
ENSMUST00000124746.1	Gm15906	Gm15906-201	chr4:129135091-129136910	+	lincRNA	48.7592	57.6351	50.9014	139.31	164.025	121.979	52.4319	141.771	2.70391	1.43505	0.00202114	0.0185136
ENSMUST00000133111.1	Phldb2	Phldb2-206	chr16:45777713-45789229	-	processed_transcript	59.7625	33.0258	87.2031	84.8926	174.067	225.265	59.9971	161.408	2.69026	1.42775	0.0820008	0.171206
ENSMUST00000124733.1	Ubfd1	Ubfd1-202	chr7:122067447-122068979	+	processed_transcript	9.03031	7.12878	9.16512	43.3625	9.48495	27.6744	8.4414	26.8406	3.17964	1.66886	0.133984	0.243598
ENSMUST00000172782.1	H2-K1	H2-K1-204	chr17:33997509-33999474	-	processed_transcript	168.538	119.827	108.317	415.384	268.978	377.166	132.227	353.843	2.67602	1.42009	0.00959851	0.0410503
ENSMUST00000127363.1	Ercc2	Ercc2-204	chr7:19382208-19385893	+	processed_transcript	15.714	2.06908	16.764	48.2023	28.5423	7.45907	11.5157	28.0679	2.43736	1.28532	0.261797	0.390332
ENSMUST00000145202.7	Raly	Raly-208	chr2:154791369-154857338	+	processed_transcript	27.81	15.3482	29.2979	58.657	77.3209	51.804	24.1521	62.594	2.59166	1.37388	0.0120508	0.0471731
ENSMUST00000143953.2	Vopp1	Vopp1-203	chr6:57762567-57824640	-	processed_transcript	6.27441	17.197	9.53916	18.1045	49.0079	21.7163	11.0035	29.6095	2.69092	1.4281	0.144503	0.25752
ENSMUST00000180853.1	B430219N15Rik	B430219N15Rik-202	chr10:7780185-7781289	+	antisense_RNA	23.2002	3.27326	12.8691	35.9193	18.7141	27.1193	13.1142	27.2509	2.07797	1.05517	0.136433	0.246538
ENSMUST00000156891.2	Ypel3	Ypel3-209	chr7:126776999-126778426	+	processed_transcript	28.3689	13.5282	28.4578	59.7617	66.6938	51.0411	23.4516	59.1655	2.52287	1.33507	0.00601965	0.0311365
ENSMUST00000142756.1	Zc3h15	Zc3h15-206	chr2:83644537-83653552	+	processed_transcript	516.9	74.1585	691.183	1103.51	727.657	613.182	427.414	814.783	1.90631	0.930783	0.175955	0.292464
ENSMUST00000142561.1	Patz1	Patz1-209	chr11:3288874-3290192	+	processed_transcript	76.2341	63.3808	57.3177	131.52	329.221	118.542	65.6442	193.094	2.94152	1.55656	0.135855	0.246112
ENSMUST00000144103.2	Bcl7c	Bcl7c-203	chr7:127705794-127708075	-	processed_transcript	14.6731	21.8253	20.2588	83.7419	38.5796	36.8978	18.919	53.0731	2.80527	1.48814	0.0922183	0.186136
ENSMUST00000133229.1	Selenok	Selenok-202	chr14:29968436-29973597	+	processed_transcript	98.1757	78.4321	96.5575	367.204	222.299	166.9	91.0551	252.134	2.76903	1.46938	0.0550917	0.128974
ENSMUST00000148135.7	Wdr13	Wdr13-208	chrX:8128034-8132819	-	processed_transcript	9.80055	18.1636	14.807	16.6706	77.4135	37.1664	14.2571	43.7502	3.06867	1.61761	0.176772	0.293146
ENSMUST00000153708.1	4833439L19Rik	4833439L19Rik-209	chr13:54552396-54565333	-	processed_transcript	138.305	122.368	181.49	264.893	423.462	496.893	147.387	395.083	2.68057	1.42254	0.0248187	0.0747828
ENSMUST00000055820.6	Gm9531	Gm9531-201	chr9:81677598-81678677	+	processed_transcript	47.3198	1	217.976	103.886	18.9161	94.8685	88.7654	72.5569	0.817401	-0.290884	0.831235	0.886674
ENSMUST00000194209.1	Elf2	Elf2-211	chr3:51264886-51340561	-	processed_transcript	17.4419	1	32.2446	70.229	1	143.265	16.8955	71.4979	4.23178	2.08126	0.263941	0.392947
ENSMUST00000145926.1	4631405J19Rik	4631405J19Rik-204	chr2:93030444-93044732	+	antisense_RNA	9.11199	1	21.3636	1	46.2725	74.9984	10.4919	40.757	3.88462	1.95777	0.246912	0.374682
ENSMUST00000193991.2	Ankrd23	Ankrd23-203	chr1:36533987-36536883	-	processed_transcript	58.4891	11.5266	12.8625	46.9017	106.561	30.5522	27.6261	61.3382	2.2203	1.15075	0.291705	0.422544
ENSMUST00000136725.1	Cdan1	Cdan1-206	chr2:120729942-120731490	-	processed_transcript	19.0408	29.6762	9.06968	32.7425	127.028	21.6872	19.2622	60.486	3.14013	1.65083	0.291426	0.422384
ENSMUST00000148859.1	Entpd2	Entpd2-203	chr2:25395916-25401292	+	processed_transcript	119.968	19.9228	11.927	170.689	138.312	21.0556	50.606	110.019	2.17403	1.12037	0.357758	0.491649
ENSMUST00000154192.1	Gm13054	Gm13054-201	chr4:148001091-148004014	-	antisense_RNA	67.1565	32.4874	28.0336	117.244	124.645	72.7475	42.5591	104.879	2.46431	1.30118	0.0377684	0.0988967
ENSMUST00000152059.1	Ndufs3	Ndufs3-206	chr2:90898296-90904642	-	processed_transcript	278.937	212.484	303.145	218.954	396.97	3566.91	264.855	1394.28	5.2643	2.39624	0.357813	0.491591
ENSMUST00000138271.1	Snrpa1	Snrpa1-203	chr7:66060781-66062170	+	processed_transcript	13.5082	15.214	19.7607	56.9674	24.3538	50.4335	16.161	43.9182	2.71754	1.4423	0.0519818	0.124057
ENSMUST00000137579.3	Tmem134	Tmem134-204	chr19:4126029-4131732	+	processed_transcript	20.7546	24.4178	18.1042	76.6939	49.7131	41.3061	21.0922	55.9044	2.65047	1.40625	0.0324532	0.0894415
ENSMUST00000221842.1	Dlst	Dlst-206	chr12:85110893-85123809	+	processed_transcript	19.4925	64.8781	30.7946	82.029	89.6748	90.5709	38.3884	87.4249	2.27738	1.18737	0.0243198	0.0736318
ENSMUST00000138245.1	Hdac10	Hdac10-206	chr15:89123674-89125685	-	processed_transcript	16.6182	13.61	13.226	62.2606	35.0953	23.3914	14.4847	40.2491	2.77872	1.47442	0.0897841	0.182392
ENSMUST00000143390.1	Telo2	Telo2-205	chr17:25099824-25101426	-	processed_transcript	18.5558	53.3715	29.369	68.8748	96.7915	74.1875	33.7654	79.9513	2.36785	1.24357	0.0260262	0.0775399
ENSMUST00000131762.1	Prdm16	Prdm16-208	chr4:154346139-154348457	-	processed_transcript	10.1878	8.55572	6.07664	45.5624	13.2079	14.9601	8.27337	24.5768	2.97059	1.57075	0.197929	0.31838
ENSMUST00000182010.1	Gm42418	Gm42418-201	chr17:39846958-39848788	+	lincRNA	43292.9	96127.2	42327.2	154789	138054	139803	60582.4	144215	2.38048	1.25125	0.0107544	0.0439421
ENSMUST00000130843.1	Exosc3	Exosc3-202	chr4:45317489-45320604	-	processed_transcript	24.5993	193	16.0502	36.5929	172.305	203.925	77.883	137.608	1.76685	0.821181	0.482103	0.597647
ENSMUST00000147286.1	Gramd4	Gramd4-205	chr15:86074733-86091434	+	processed_transcript	33.1468	38.2548	53.5564	116.478	99.27	98.6349	41.6527	104.794	2.51591	1.33108	0.00173089	0.0172336
ENSMUST00000170661.1	Spata48	Spata48-203	chr11:11462094-11488537	+	processed_transcript	36.1096	87.5971	30.7379	101.054	109.869	146.791	51.4815	119.238	2.31613	1.21171	0.0416447	0.106016
ENSMUST00000153945.1	Hdac3	Hdac3-204	chr18:37936978-37954931	-	processed_transcript	54.5246	34.2669	1	21.087	58.9281	25.1832	29.9305	35.0661	1.17158	0.228461	0.806983	0.867602
ENSMUST00000152754.8	H19	H19-205	chr7:142575533-142577386	-	lincRNA	32.3737	46.3882	53.6311	128.134	52.9554	197.099	44.131	126.063	2.85656	1.51428	0.123431	0.229717
ENSMUST00000126135.1	Plk3	Plk3-202	chr4:117128655-117133944	-	processed_transcript	79.1809	63.157	1	77.9372	13.3852	79.5055	47.7793	56.9426	1.19178	0.253123	0.790694	0.855567
ENSMUST00000153472.1	Akirin1	Akirin1-203	chr4:123738940-123750231	-	processed_transcript	161.187	440.698	166.747	566.124	420.405	817.682	256.211	601.404	2.3473	1.231	0.0803744	0.168579
ENSMUST00000154800.1	Pop5	Pop5-206	chr5:115237979-115240242	+	processed_transcript	32.013	33.9875	34.1177	87.3625	88.3165	79.0371	33.3727	84.9054	2.54416	1.34719	6.96013e-05	0.00730524
ENSMUST00000127236.1	Nudt3	Nudt3-204	chr17:27580952-27611670	-	processed_transcript	30.8501	1.8678	53.345	61.0147	7.79386	105.865	28.6876	58.2246	2.02961	1.0212	0.40853	0.53362
ENSMUST00000156366.7	Ppp5c	Ppp5c-211	chr7:17008590-17027894	-	processed_transcript	67.9364	9.74716	55.0379	450.688	8.79836	148.827	44.2405	202.771	4.58338	2.19641	0.294651	0.425955
ENSMUST00000156151.7	Tada2a	Tada2a-205	chr11:84079531-84082956	-	processed_transcript	4.2106	2.61381	1.37786	1	69.3337	3.51523	2.73409	24.6163	9.00348	3.17048	0.383662	0.513111
ENSMUST00000150214.1	Ikbkb	Ikbkb-213	chr8:22702452-22706525	-	processed_transcript	31.8172	36.5897	64.336	70.8674	124.353	136.443	44.2476	110.554	2.49854	1.32108	0.0423983	0.10723
ENSMUST00000134369.1	Stk40	Stk40-204	chr4:126128819-126132798	+	processed_transcript	12.0718	28.9205	9.47429	42.8063	32.7581	37.8204	16.8222	37.7949	2.24673	1.16783	0.035981	0.0955574
ENSMUST00000127488.1	Gm11973	Gm11973-202	chr11:6475425-6490918	+	antisense_RNA	20.8146	43.5836	14.4117	48.2599	76.0535	56.7702	26.27	60.3612	2.29773	1.20021	0.0477381	0.116806
ENSMUST00000156073.1	Med7	Med7-208	chr11:46437005-46439942	+	processed_transcript	15.279	50.2479	30.5519	152.827	91.9995	26.0111	32.0262	90.2792	2.81891	1.49514	0.199977	0.320242
ENSMUST00000155956.1	Atp5j	Atp5j-212	chr16:84831369-84835005	-	processed_transcript	103.563	88.5879	18.2421	112.208	229.244	99.0861	70.131	146.846	2.09388	1.06618	0.192681	0.312332
ENSMUST00000070956.3	Gm11696	Gm11696-201	chr11:109354778-109363654	-	antisense_RNA	40.8797	40.987	1	26.9365	27.7652	34.0756	27.6222	29.5924	1.07133	0.0993995	0.891032	0.925571
ENSMUST00000143893.1	Kcnd3os	Kcnd3os-202	chr3:105441595-105451727	-	antisense_RNA	22.6606	50.3218	1	22.5885	49.7001	15.4252	24.6608	29.2379	1.1856	0.245623	0.808524	0.868332
ENSMUST00000141111.1	Ttyh2	Ttyh2-202	chr11:114675516-114690603	+	processed_transcript	8.80965	16.3494	9.38856	46.2732	19.0156	23.1995	11.5159	29.4961	2.56134	1.3569	0.110963	0.212964
ENSMUST00000173654.1	Arhgap21	Arhgap21-215	chr2:20967690-20968880	-	processed_transcript	1	25.3187	38.7782	38.8306	14.2377	26.8076	21.699	26.6253	1.22703	0.295173	0.726725	0.805022
ENSMUST00000150094.7	Tepsin	Tepsin-205	chr11:120094160-120097385	-	processed_transcript	14.9919	21.5385	12.0681	23.1364	52.8286	47.7285	16.1995	41.2312	2.54521	1.34778	0.0593142	0.135891
ENSMUST00000172870.1	Yap1	Yap1-203	chr9:7973838-8003775	-	processed_transcript	23.3859	24.3115	12.4086	77.6167	51.4465	26.1711	20.0353	51.7447	2.58268	1.36887	0.107515	0.20825
ENSMUST00000142004.7	Fbxw5	Fbxw5-208	chr2:25500859-25503186	+	processed_transcript	81.1053	101.357	38.7737	131.015	220.941	162.766	73.7453	171.574	2.32657	1.21821	0.0382711	0.0997981
ENSMUST00000128281.1	Tmem256	Tmem256-202	chr11:69838638-69839573	+	processed_transcript	23.3122	23.9084	36.9871	95.2398	27.7929	114.248	28.0692	79.0936	2.8178	1.49457	0.127614	0.235416
ENSMUST00000200428.1	Rprd2	Rprd2-206	chr3:95773070-95776758	-	processed_transcript	45.6226	33.7424	30.1918	81.844	122.08	67.713	36.5189	90.5457	2.47942	1.31	0.0332477	0.0907378
ENSMUST00000146163.1	Map3k14	Map3k14-202	chr11:103220805-103221847	-	processed_transcript	6.56379	30.0136	12.9682	62.9792	23.5719	25.0364	16.5152	37.1959	2.25222	1.17135	0.231546	0.356846
ENSMUST00000156179.7	Spata6	Spata6-214	chr4:111720063-111779011	+	processed_transcript	1	33.8064	24.6018	13.3182	12.3045	73.579	19.8028	33.0672	1.66983	0.739702	0.587045	0.691173
ENSMUST00000227197.1	Mzt1	Mzt1-202	chr14:99036269-99045952	-	processed_transcript	36.1524	4.23342	25.0632	23.6385	49.6284	46.9011	21.8164	40.056	1.83606	0.876609	0.217427	0.340185
ENSMUST00000227081.1	Sybu	Sybu-206	chr15:44671856-44747917	-	processed_transcript	7.98553	1.15161	1.5802	74.9508	1	2.77176	3.57245	26.2409	7.34534	2.87683	0.406516	0.531817
ENSMUST00000173810.1	Slc39a7	Slc39a7-206	chr17:34030593-34031682	-	processed_transcript	36.2503	75.3839	24.9231	93.5532	171.772	59.8395	45.5191	108.388	2.38116	1.25166	0.160154	0.275096
ENSMUST00000173813.7	Adamts10	Adamts10-206	chr17:33531741-33543225	+	processed_transcript	19.281	21.3187	7.01696	21.9032	43.2089	42.9682	15.8722	36.0268	2.2698	1.18257	0.0733976	0.158092
ENSMUST00000142197.1	Kcnh2	Kcnh2-205	chr5:24325448-24326519	-	processed_transcript	29.3722	15.862	21.6957	26.8244	43.5919	120.722	22.3099	63.7129	2.85581	1.5139	0.228884	0.353717
ENSMUST00000209728.1	1300002E11Rik	1300002E11Rik-206	chr16:21794356-21808820	+	lincRNA	34.3834	1	19.2059	32.7567	30.5853	9.20495	18.1964	24.1823	1.32896	0.410298	0.650182	0.746324
ENSMUST00000137445.1	Cd52	Cd52-202	chr4:134094076-134095038	-	processed_transcript	6.23554	11.4795	6.68662	24.1496	42.8733	6.42424	8.13388	24.4824	3.00992	1.58973	0.19977	0.320115
ENSMUST00000127119.1	Sh3bp5l	Sh3bp5l-203	chr11:58345312-58346950	+	processed_transcript	16.4245	20.9737	1	87.5716	54.5888	1	12.7994	47.7201	3.72831	1.89852	0.249463	0.37753
ENSMUST00000221575.1	Gdi2	Gdi2-203	chr13:3538083-3554432	+	processed_transcript	2.75491	1	8.01848	1	302.111	1	3.92446	101.37	25.8303	4.69099	0.386688	0.516198
ENSMUST00000226919.1	Dzip1	Dzip1-203	chr14:118923052-118925460	-	processed_transcript	6.39356	19.0613	16.0814	25.271	59.6785	17.6852	13.8454	34.2116	2.47097	1.30508	0.2052	0.326119
ENSMUST00000124935.7	Gnas	Gnas-212	chr2:174327570-174345241	+	processed_transcript	59.984	38.3843	41.2364	119.252	154.847	69.6279	46.5349	114.576	2.46215	1.29992	0.0566603	0.131728
ENSMUST00000050829.1	2010007H06Rik	2010007H06Rik-201	chr9:51280295-51280920	+	antisense_RNA	5.22971	10.2869	5.01534	19.9263	3.75502	48.2925	6.84399	23.9913	3.50545	1.8096	0.261606	0.390278
ENSMUST00000124669.1	Mical3	Mical3-203	chr6:120960012-120966118	-	processed_transcript	164.97	175.407	138.685	430.546	347.119	358.918	159.687	378.861	2.37252	1.24642	0.00149002	0.016319
ENSMUST00000172982.1	Nat8f1	Nat8f1-202	chr6:85910162-85915666	-	processed_transcript	1	1	70.543	36.4859	1	25.7884	24.181	21.0914	0.872232	-0.197217	0.909238	0.937332
ENSMUST00000170335.3	Rps2-ps10	Rps2-ps10-202	chr18:61259008-61259972	-	processed_transcript	9.42499	5.11458	7.92233	178.626	5.22959	5.37769	7.4873	63.0776	8.42461	3.07461	0.390539	0.518728
ENSMUST00000141459.1	Lgals3bp	Lgals3bp-204	chr11:118396809-118401872	-	processed_transcript	11.7637	23.1484	20.6117	29.7961	33.5826	73.5064	18.5079	45.6284	2.46534	1.30179	0.132791	0.24248
ENSMUST00000128991.1	Aldh3a2	Aldh3a2-204	chr11:61264170-61267127	-	processed_transcript	20.1639	14.414	31.099	93.5598	23.6591	52.9516	21.8923	56.7235	2.59103	1.37352	0.170112	0.286439
ENSMUST00000137014.1	Adam19	Adam19-202	chr11:46056058-46065082	+	processed_transcript	23.6637	14.8648	36.923	50.4493	57.7461	57.4918	25.1505	55.229	2.19594	1.13484	0.0117276	0.0463767
ENSMUST00000130289.1	Alkbh3	Alkbh3-207	chr2:94008037-94010752	-	processed_transcript	81.1725	75.606	57.4785	168.509	151.894	177.676	71.419	166.026	2.32468	1.21703	0.000808987	0.0131473
ENSMUST00000150414.7	Cnp	Cnp-204	chr11:100575524-100581728	+	processed_transcript	2.33974	13.6658	40.5273	19.3564	48.7798	17.6587	18.8443	28.5983	1.51761	0.601803	0.555375	0.661773
ENSMUST00000153246.1	Trpc4ap	Trpc4ap-210	chr2:155634745-155637736	-	processed_transcript	42.3724	34.4836	71.7171	108.91	73.6322	166.938	49.5244	116.493	2.35225	1.23404	0.0854602	0.176454
ENSMUST00000142959.1	Aatk	Aatk-208	chr11:120007313-120012408	-	processed_transcript	27.5051	43.745	30.6975	84.2187	66.9929	83.3538	33.9826	78.1885	2.30084	1.20216	0.00412019	0.025532
ENSMUST00000128659.1	Tmem106a	Tmem106a-205	chr11:101585997-101590766	+	processed_transcript	43.1565	76.1082	14.6839	132.079	54.1408	85.6715	44.6496	90.6304	2.02982	1.02135	0.185152	0.303842
ENSMUST00000147120.1	Dctn3	Dctn3-202	chr4:41719768-41723137	-	processed_transcript	23.4051	23.009	26.8045	103.978	48.7821	36.0475	24.4062	62.9359	2.57869	1.36664	0.13878	0.249437
ENSMUST00000150598.1	Igsf8	Igsf8-205	chr1:172318781-172319553	+	processed_transcript	19.2907	47.7886	13.421	74.3192	35.5694	58.8231	26.8334	56.2372	2.09579	1.06749	0.130212	0.238895
ENSMUST00000135105.1	Ptpa	Ptpa-209	chr2:30445716-30446776	+	processed_transcript	67.6852	1	40.9545	22.3301	40.5473	38.2302	36.5466	33.7025	0.92218	-0.11688	0.89486	0.927826
ENSMUST00000219814.1	Csnk1g2	Csnk1g2-205	chr10:80634395-80638278	+	processed_transcript	8.81276	15.9376	10.0195	30.6102	35.5706	16.0988	11.59	27.4265	2.3664	1.24269	0.0642102	0.143391
ENSMUST00000141109.1	Epb41l1	Epb41l1-209	chr2:156475550-156499674	+	processed_transcript	33.806	52.7648	37.9541	92.088	77.2887	117.212	41.5083	95.5296	2.30146	1.20255	0.0141823	0.0527311
ENSMUST00000130577.1	Fastk	Fastk-205	chr5:24443931-24445197	-	processed_transcript	91.3352	78.9194	60.2163	149.531	157.135	227.489	76.8236	178.052	2.31767	1.21268	0.0185769	0.0619395
ENSMUST00000208055.1	Gm44732	Gm44732-201	chr7:143459749-143460640	+	antisense_RNA	41.4679	58.5417	68.5087	305.279	77.3793	84.8132	56.1728	155.824	2.77401	1.47197	0.255611	0.383835
ENSMUST00000189843.1	5033430I15Rik	5033430I15Rik-202	chr13:45965351-45966177	+	lincRNA	87.8529	56.5622	1	54.7547	21.4033	51.0612	48.4717	42.4064	0.874869	-0.192861	0.836254	0.890143
ENSMUST00000224036.1	Gm6277	Gm6277-202	chr18:11838091-11840869	-	antisense_RNA	51.075	10.8383	77.666	73.5326	73.8945	95.0026	46.5264	80.8099	1.73686	0.796482	0.172712	0.288598
ENSMUST00000137709.1	Rab14	Rab14-204	chr2:35182129-35184050	-	processed_transcript	43.9044	40.3864	41.0303	59.9903	191.468	75.8931	41.7737	109.117	2.6121	1.38521	0.179509	0.296805
ENSMUST00000147911.1	Galnt2	Galnt2-204	chr8:124295366-124345724	+	processed_transcript	1.07208	36.9694	57.7646	23.8239	42.3547	27.1815	31.9354	31.1201	0.97447	-0.0373097	0.965098	0.975555
ENSMUST00000225619.1	Etohd2	Etohd2-203	chr13:59769497-59771408	+	antisense_RNA	1	30.2734	52.7959	30.5863	24.8621	25.1467	28.0231	26.865	0.958673	-0.0608886	0.942586	0.960313
ENSMUST00000135109.1	Cecr2	Cecr2-205	chr6:120666535-120724748	+	processed_transcript	7.76954	1	18.2355	103.421	1	16.3834	9.00169	40.2683	4.47341	2.16138	0.387579	0.51684
ENSMUST00000129950.1	Atcayos	Atcayos-202	chr10:81194683-81209161	+	antisense_RNA	203.396	114.582	191.586	343.986	397.25	390.217	169.855	377.151	2.22043	1.15084	0.00309005	0.0223995
ENSMUST00000124991.1	Pabpc4	Pabpc4-205	chr4:123294964-123298006	+	processed_transcript	49.6485	25.4639	13.6883	170.917	42.7586	28.0562	29.6003	80.5774	2.72218	1.44476	0.335327	0.469402
ENSMUST00000226878.1	Npr3	Npr3-203	chr15:11902885-11907201	-	processed_transcript	23.5805	32.535	20.225	71.7463	41.3896	61.8719	25.4468	58.3359	2.29246	1.1969	0.0272073	0.0793691
ENSMUST00000138464.1	Lzic	Lzic-203	chr4:149485240-149485741	+	processed_transcript	43.3303	60.8681	38.7898	52.2187	250.751	91.9089	47.6627	131.626	2.76162	1.46551	0.240881	0.367745
ENSMUST00000152613.1	Rnf10	Rnf10-208	chr5:115248693-115249487	-	processed_transcript	9.68862	15.8139	10.541	36.7004	28.7708	17.8875	12.0145	27.7862	2.31272	1.20959	0.052508	0.12484
ENSMUST00000127287.1	Nrros	Nrros-205	chr16:32144815-32165476	-	processed_transcript	51.6983	4.72875	1	29.9059	95.0742	1	19.1423	41.9934	2.19374	1.1334	0.517725	0.628202
ENSMUST00000153101.6	Ppp1r12c	Ppp1r12c-210	chr7:4481588-4482634	-	processed_transcript	34.0209	18.0534	3.36006	33.1641	19.3891	37.2873	18.4781	29.9468	1.62067	0.696586	0.331047	0.46535
ENSMUST00000126786.1	Trappc3	Trappc3-202	chr4:126262400-126273475	+	processed_transcript	56.0651	67.0597	103.729	213.118	173.302	122.576	75.618	169.666	2.24372	1.16589	0.0346718	0.0932602
ENSMUST00000147969.7	Kmt5a	Kmt5a-209	chr5:124445505-124461543	+	processed_transcript	25.5415	18.653	13.8614	30.6266	70.5754	34.9089	19.352	45.3703	2.34448	1.22927	0.118154	0.223613
ENSMUST00000152479.1	Anks6	Anks6-203	chr4:47017000-47025710	-	processed_transcript	14.9439	8.50898	9.4758	22.8737	17.5312	33.6763	10.9762	24.6937	2.24974	1.16976	0.0563014	0.131014
ENSMUST00000124911.1	Lonp2	Lonp2-204	chr8:86631397-86665841	+	processed_transcript	1.25486	1	8.88198	124.513	1	1	3.71228	42.1708	11.3598	3.50587	0.403966	0.529168
ENSMUST00000146055.7	Ntpcr	Ntpcr-206	chr8:125729963-125745299	+	processed_transcript	8.59046	16.2371	20.4434	46.1454	24.8178	27.5224	15.0903	32.8285	2.17547	1.12133	0.0785255	0.165666
ENSMUST00000131665.7	Dpp7	Dpp7-203	chr2:25354468-25356297	-	processed_transcript	9.84926	23.041	5.69711	24.9853	18.8581	30.0167	12.8625	24.6201	1.9141	0.936668	0.128195	0.235969
ENSMUST00000140368.1	Fmnl3	Fmnl3-205	chr15:99327844-99335727	-	processed_transcript	21.2465	42.3231	33.1991	102.348	63.7928	49.8177	32.2562	71.9863	2.2317	1.15814	0.0778638	0.164408
ENSMUST00000169791.3	Dubr	Dubr-201	chr16:50727436-50732688	-	lincRNA	12.9436	21.0572	1	140.083	1	21.1069	11.6669	54.0632	4.63389	2.21222	0.387772	0.516824
ENSMUST00000191667.5	Rpl22l1	Rpl22l1-202	chr3:28805597-28807294	+	processed_transcript	25.7287	40.8515	33.2114	62.3777	105.978	57.1429	33.2639	75.1661	2.25969	1.17613	0.0597152	0.136562
ENSMUST00000142665.1	Wrap73	Wrap73-203	chr4:154142409-154156816	+	processed_transcript	25.9819	23.8657	18.4727	34.7608	60.0461	59.2699	22.7734	51.3589	2.25521	1.17326	0.0292487	0.0833927
ENSMUST00000137522.7	Slc25a38	Slc25a38-203	chr9:120110408-120120305	+	processed_transcript	33.1699	1	35.3404	26.5667	27.8075	17.1198	23.1701	23.8314	1.02854	0.040598	0.95729	0.970192
ENSMUST00000142747.1	Eif3j1	Eif3j1-202	chr2:122028652-122029328	+	processed_transcript	77.13	96.6155	55.1835	131.063	171.852	196.743	76.3097	166.553	2.18259	1.12604	0.0161691	0.0573259
ENSMUST00000139105.7	Naa10	Naa10-208	chrX:73916873-73919862	-	processed_transcript	36.4623	42.5881	3.56598	22.5815	37.5942	70.2034	27.5388	43.4597	1.57813	0.658212	0.439306	0.560878
ENSMUST00000127645.1	Stoml2	Stoml2-205	chr4:43030041-43031358	-	processed_transcript	16.2002	13.1286	15.2525	46.8816	46.216	15.9911	14.8604	36.3629	2.44696	1.29099	0.103385	0.20196
ENSMUST00000180377.8	Dleu2	Dleu2-201	chr14:61619473-61682325	-	lincRNA	1	46.5938	88.0489	59.6721	13.7466	53.0825	45.2142	42.1671	0.932606	-0.10066	0.921211	0.945033
ENSMUST00000136359.7	H19	H19-202	chr7:142575529-142578143	-	lincRNA	209.485	180.86	236.196	503.534	212.368	888.124	208.847	534.675	2.56013	1.35622	0.17236	0.288297
ENSMUST00000165843.1	Sned1	Sned1-203	chr1:93274431-93282317	+	processed_transcript	33.4278	26.6547	29.5251	91.618	49.7941	60.9726	29.8692	67.4616	2.25857	1.17541	0.0411217	0.105056
ENSMUST00000151578.1	Raly	Raly-209	chr2:154791715-154857451	+	processed_transcript	21.9282	12.8782	8.56406	19.2438	31.676	41.9344	14.4568	30.9514	2.14096	1.09826	0.0973487	0.194081
ENSMUST00000172799.7	Rps18	Rps18-203	chr17:33952000-33954490	-	processed_transcript	263.298	274.149	310.26	663.04	538.025	663.527	282.569	621.531	2.19957	1.13722	0.00154108	0.0165897
ENSMUST00000126248.7	Rpn2	Rpn2-205	chr2:157283583-157325735	+	processed_transcript	47.0733	55.4346	64.2825	77.0594	75.7493	303.419	55.5968	152.076	2.73533	1.45172	0.272224	0.402188
ENSMUST00000168961.7	Gm20498	Gm20498-204	chr12:81474617-81532877	-	processed_transcript	1.02181	75.1262	31.5588	29.7685	23.4837	36.4675	35.9023	29.9066	0.832999	-0.263613	0.797151	0.859415
ENSMUST00000153417.1	Chm	Chm-205	chrX:113043174-113047579	-	processed_transcript	5.7988	14.9534	28.9851	18.4676	43.736	32.6905	16.5791	31.6314	1.90791	0.931991	0.204781	0.325659
ENSMUST00000205688.1	Mfge8	Mfge8-207	chr7:79142869-79147560	-	processed_transcript	24.0858	15.1694	10.6781	44.2895	38.4865	23.6162	16.6444	35.4641	2.13069	1.09132	0.0616649	0.139438
ENSMUST00000149814.7	Gga3	Gga3-210	chr11:115592499-115603724	-	processed_transcript	13.5025	30.5072	38.8774	48.1973	41.8983	81.7424	27.629	57.2793	2.07316	1.05183	0.109355	0.210842
ENSMUST00000146566.1	Baiap2	Baiap2-207	chr11:119943472-119981419	+	processed_transcript	9.68124	5.64713	16.1391	33.2299	14.3855	19.0222	10.4892	22.2125	2.11767	1.08247	0.142811	0.255046
ENSMUST00000148198.2	Mov10l1	Mov10l1-204	chr15:89020421-89023621	+	processed_transcript	56.0192	65.7984	23.4149	137.948	66.9052	94.5079	48.4108	99.7871	2.06126	1.04352	0.102255	0.200608
ENSMUST00000168731.1	Usf2	Usf2-206	chr7:30955927-30956650	-	processed_transcript	73.4684	168.58	88.2362	224.08	171.356	286.599	110.095	227.345	2.065	1.04614	0.0579909	0.133833
ENSMUST00000123186.1	Zdhhc7	Zdhhc7-202	chr8:120092975-120101072	-	processed_transcript	74.1475	34.1312	36.1557	65.9432	118.036	118.353	48.1448	100.777	2.09321	1.06572	0.0727069	0.157277
ENSMUST00000171437.7	Pcbp3	Pcbp3-208	chr10:76789803-76905862	-	processed_transcript	3.38763	54.2262	1	1	61.2001	29.9196	19.5379	30.7066	1.57164	0.65227	0.672941	0.764781
ENSMUST00000160782.1	Efhc1	Efhc1-202	chr1:20951626-20955527	+	processed_transcript	29.6072	38.481	1	34.4459	10.6762	30.8175	23.0294	25.3132	1.09917	0.136414	0.873972	0.914259
ENSMUST00000130948.7	Zc3h15	Zc3h15-203	chr2:83644481-83658302	+	processed_transcript	23.5811	96.4373	23.8289	41.6037	106.146	121.084	47.9491	89.6114	1.86888	0.902178	0.292371	0.423387
ENSMUST00000142474.1	Alas2	Alas2-204	chrX:150566390-150570622	+	processed_transcript	11.8107	18.4145	11.7908	30.7206	35.8623	22.9	14.0053	29.8276	2.12973	1.09067	0.0222772	0.0693221
ENSMUST00000180770.2	Gm26674	Gm26674-201	chr10:8884637-8886878	+	antisense_RNA	13.6413	14.4435	13.9952	33.0354	28.4161	28.8629	14.0267	30.1048	2.14625	1.10182	0.000417395	0.010308
ENSMUST00000202666.1	Cnot4	Cnot4-208	chr6:35052900-35133687	-	processed_transcript	46.238	38.3167	40.7551	95.3556	143.338	51.8859	41.77	96.8597	2.31888	1.21343	0.106294	0.206361
ENSMUST00000123394.1	Wbp1	Wbp1-203	chr6:83119640-83121259	-	processed_transcript	42.4072	48.2256	25.8179	64.8698	65.1365	121.896	38.8169	83.9676	2.16317	1.11315	0.0881973	0.18004
ENSMUST00000131964.1	Cuedc1	Cuedc1-203	chr11:88098058-88100108	+	processed_transcript	32.7387	34.6543	47.4348	78.3904	91.655	72.1073	38.2759	80.7176	2.10883	1.07644	0.0045342	0.0265003
ENSMUST00000134919.1	Atp6v0a1	Atp6v0a1-205	chr11:101021137-101027500	+	processed_transcript	8.57504	14.1836	10.6517	27.5645	27.0645	16.7151	11.1368	23.7814	2.13539	1.0945	0.0315255	0.0878944
ENSMUST00000223568.1	Dcp1a	Dcp1a-202	chr14:30513287-30523519	+	processed_transcript	6.43062	39.5904	16.615	12.9098	40.3323	77.5679	20.8787	43.6033	2.08842	1.06241	0.343074	0.475752
ENSMUST00000136174.7	Rps6	Rps6-204	chr4:86854804-86857345	-	processed_transcript	1831.63	1837.43	2151.68	4131.59	5363.07	3103.12	1940.24	4199.26	2.1643	1.1139	0.0269379	0.079087
ENSMUST00000155231.1	Bgn	Bgn-206	chrX:73492057-73493310	+	processed_transcript	9.30904	5.35231	12.3508	1	47.9863	121.379	9.00405	56.7885	6.30699	2.65695	0.244884	0.372389
ENSMUST00000217835.1	Rrp1	Rrp1-203	chr10:78405030-78412990	-	processed_transcript	1278.03	52.1122	909.55	817.708	718.219	976.237	746.564	837.388	1.12166	0.165631	0.818575	0.876697
ENSMUST00000145317.1	Psmc3	Psmc3-206	chr2:91058109-91059434	+	processed_transcript	8.12608	17.0393	7.04076	28.6234	18.8135	17.1259	10.7354	21.5209	2.00468	1.00337	0.0871839	0.178622
ENSMUST00000138440.1	Sympk	Sympk-205	chr7:19045694-19050063	+	processed_transcript	15.8792	22.2674	29.5914	69.5435	52.5922	26.9889	22.5793	49.7082	2.20149	1.13848	0.104972	0.204346
ENSMUST00000183360.1	Ei24	Ei24-203	chr9:36786523-36797361	-	processed_transcript	1	46.9249	23.9611	1	118.256	89.359	23.962	69.5384	2.90203	1.53706	0.293034	0.424104
ENSMUST00000143042.7	Rgs3	Rgs3-213	chr4:62623531-62631320	+	processed_transcript	8.44122	12.1464	23.156	13.9569	36.5531	43.6069	14.5812	31.3723	2.15156	1.10538	0.167593	0.28381
ENSMUST00000125166.1	Rack1	Rack1-202	chr11:48803152-48806073	+	processed_transcript	32.2356	55.3303	16.6048	112.651	73.6323	33.3442	34.7236	73.2091	2.10834	1.07611	0.205868	0.326562
ENSMUST00000200841.3	Rbm19	Rbm19-202	chr5:120156811-120198971	+	processed_transcript	25.4193	42.5152	53.8722	65.7258	195.687	42.1396	40.6022	101.184	2.49208	1.31735	0.279311	0.409656
ENSMUST00000146892.1	Mvb12b	Mvb12b-202	chr2:33873614-33887482	-	processed_transcript	35.1498	71.4161	22.4846	185.495	34.9042	80.4733	43.0169	100.291	2.33143	1.22121	0.289385	0.419909
ENSMUST00000138353.7	Ppp5c	Ppp5c-204	chr7:17007787-17027924	-	processed_transcript	15.0675	1.34666	16.2085	103.359	1	29.2752	10.8742	44.5447	4.09636	2.03434	0.336976	0.470403
ENSMUST00000170950.1	Mier2	Mier2-211	chr10:79542467-79544352	-	processed_transcript	13.603	13.0706	7.39163	6.78334	30.2624	58.4991	11.3551	31.8483	2.80476	1.48788	0.245777	0.373522
ENSMUST00000134632.1	Ran	Ran-203	chr5:129020202-129020788	+	processed_transcript	10.3521	33.7968	24.5546	49.4636	53.0846	29.8324	22.9012	44.1269	1.92684	0.946236	0.0994337	0.196604
ENSMUST00000224078.1	Hdgfl2	Hdgfl2-202	chr17:56079893-56082399	+	processed_transcript	29.0336	45.5926	52.1195	151.689	37.465	109.614	42.2486	99.5896	2.35723	1.23709	0.167491	0.283732
ENSMUST00000140527.1	Rpl30	Rpl30-205	chr15:34442521-34443259	-	processed_transcript	28.6014	23.7247	16.1539	40.506	49.2486	49.3398	22.8267	46.3648	2.03117	1.02231	0.00721358	0.0347771
ENSMUST00000182689.7	Rian	Rian-210	chr12:109604046-109627075	+	lincRNA	28.6332	5.92712	23.224	50.0068	16.9663	41.4501	19.2614	36.1411	1.87634	0.907923	0.233488	0.359179
ENSMUST00000129246.1	Kcnh2	Kcnh2-204	chr5:24320083-24322254	-	processed_transcript	18.6593	31.2449	24.2017	50.5123	57.9563	42.8123	24.702	50.427	2.04141	1.02957	0.0106493	0.0436541
ENSMUST00000148380.1	Dmpk	Dmpk-214	chr7:19091616-19092535	+	processed_transcript	12.7535	25.5444	21.897	26.8305	46.6584	50.4392	20.065	41.3093	2.05878	1.04179	0.061661	0.139492
ENSMUST00000127079.1	Ncdn	Ncdn-203	chr4:126744731-126753438	-	processed_transcript	24.1392	29.6383	23.4811	58.5527	36.5362	69.216	25.7529	54.7683	2.12669	1.08861	0.0417443	0.106216
ENSMUST00000154564.1	H2afy	H2afy-207	chr13:56104441-56134825	-	processed_transcript	10.0671	15.025	10.5022	33.5944	16.1633	25.7455	11.8648	25.1677	2.12122	1.08489	0.0655111	0.14578
ENSMUST00000123327.1	Fahd2a	Fahd2a-202	chr2:127436271-127438319	-	processed_transcript	8.26196	14.8796	12.7857	12.3408	7.83259	142.529	11.9758	54.234	4.52865	2.17908	0.393272	0.521533
ENSMUST00000141470.1	Ssna1	Ssna1-204	chr2:25271086-25272438	-	processed_transcript	260.594	313.65	386.265	674.149	662.077	617.862	320.17	651.363	2.03443	1.02462	0.00118846	0.0146751
ENSMUST00000160794.1	Hrasls	Hrasls-202	chr16:29210130-29228228	+	processed_transcript	99.9965	84.0392	138.617	223.257	208.413	216.415	107.551	216.028	2.00862	1.0062	0.00293582	0.0220099
ENSMUST00000197357.1	Ube2d3	Ube2d3-209	chr3:135438529-135441597	+	processed_transcript	52.4262	30.7691	23.884	156.979	31.5396	66.0151	35.6931	84.8445	2.37706	1.24918	0.269643	0.39943
ENSMUST00000210472.1	Il15	Il15-206	chr8:82379489-82403209	-	processed_transcript	32.9366	18.9376	16.0572	48.0242	26.413	66.8971	22.6438	47.1114	2.08055	1.05696	0.128627	0.236678
ENSMUST00000177235.7	Foxp1	Foxp1-227	chr6:99260357-99522647	-	processed_transcript	6.79733	17.1567	12.1183	277.638	5.21505	8.24523	12.0241	97.0328	8.06985	3.01254	0.400068	0.526526
ENSMUST00000221453.1	Slc25a47	Slc25a47-203	chr12:108836046-108837497	+	processed_transcript	249.349	35.9268	49.9793	290.584	275.458	46.9048	111.752	204.316	1.8283	0.870503	0.426612	0.548703
ENSMUST00000122956.1	Ppp1r15b	Ppp1r15b-202	chr1:133131344-133139783	+	processed_transcript	38.3119	54.9852	76.3929	64.3794	133.152	156.072	56.5633	117.868	2.08382	1.05923	0.107719	0.208326
ENSMUST00000130556.1	Arhgap27os1	Arhgap27os1-201	chr11:103363213-103364651	+	antisense_RNA	10.7396	7.73122	20.5684	19.8191	27.7454	25.6914	13.013	24.4186	1.87647	0.908023	0.0661297	0.146638
ENSMUST00000228206.1	Flnb	Flnb-202	chr14:7884741-7887542	+	processed_transcript	23.9071	3.36149	15.7787	22.7382	33.0558	13.9197	14.3491	23.2379	1.61947	0.69552	0.33622	0.469869
ENSMUST00000211494.1	Rpl13a	Rpl13a-219	chr7:45126478-45126987	-	processed_transcript	7.58414	11.4495	16.5038	21.0546	22.9526	24.4668	11.8458	22.8247	1.92682	0.94622	0.0165237	0.0576898
ENSMUST00000154948.7	Tarbp2	Tarbp2-214	chr15:102518557-102523219	+	processed_transcript	38.7687	79.0526	19.2692	62.1517	92.2211	84.6233	45.6968	79.6654	1.74335	0.801859	0.161088	0.276136
ENSMUST00000153378.1	Pdia3	Pdia3-204	chr2:121413883-121424601	+	processed_transcript	55.7303	9.19741	15.3459	47.3987	45.5454	29.8246	26.7579	40.9229	1.52938	0.612945	0.415858	0.54053
ENSMUST00000144052.1	Rnf44	Rnf44-212	chr13:54684041-54693850	-	processed_transcript	10.2839	18.4237	11.5314	28.3329	32.4795	19.4109	13.413	26.7411	1.99367	0.99543	0.0445736	0.110676
ENSMUST00000144749.1	Agrn	Agrn-204	chr4:156172299-156173730	-	processed_transcript	24.5374	12.2051	13.361	35.823	22.3289	40.8111	16.7012	32.9877	1.97517	0.981978	0.0741225	0.158906
ENSMUST00000221288.1	Dlst	Dlst-204	chr12:85110858-85123806	+	processed_transcript	155.316	177.475	169.096	329.275	313.92	367.309	167.296	336.835	2.01341	1.00964	0.000585336	0.0120364
ENSMUST00000210072.1	5830408C22Rik	5830408C22Rik-201	chr8:25101216-25109368	+	antisense_RNA	21.1247	39.8179	39.3114	45.3606	58.8935	100.037	33.418	68.0971	2.03774	1.02697	0.11939	0.225277
ENSMUST00000207451.1	Gm44899	Gm44899-201	chr7:80981122-80993415	-	lincRNA	203.501	312.949	169.805	483.4	447.329	402.05	228.752	444.26	1.9421	0.957621	0.0118737	0.0467708
ENSMUST00000156318.7	Prdx6	Prdx6-206	chr1:161241635-161251121	-	processed_transcript	1035.93	1004.94	48.7966	700.548	1127.13	517.192	696.554	781.623	1.12213	0.166236	0.829876	0.885412
ENSMUST00000176569.2	6330562C20Rik	6330562C20Rik-202	chr3:95311378-95315127	-	antisense_RNA	64.2596	31.3372	36.9905	75.3923	87.4473	90.5418	44.1958	84.4605	1.91105	0.934367	0.0226308	0.0700762
ENSMUST00000151686.1	Coasy	Coasy-204	chr11:101083895-101085179	+	processed_transcript	64.6497	24.3105	22.9415	87.016	34.9929	94.7568	37.3006	72.2552	1.93711	0.953904	0.206717	0.327703
ENSMUST00000130596.1	Fam114a2	Fam114a2-204	chr11:57507375-57518602	-	processed_transcript	24.4446	53.2509	33.1643	126.961	56.8447	47.83	36.9533	77.2118	2.08945	1.06312	0.202297	0.322421
ENSMUST00000138637.1	Tmem168	Tmem168-203	chr6:13607288-13608027	-	processed_transcript	16.5794	30.1189	42.5496	59.3972	52.7986	54.1135	29.7493	55.4364	1.86345	0.897978	0.0297155	0.0842469
ENSMUST00000148524.1	Dpy19l4	Dpy19l4-206	chr4:11317096-11322100	-	processed_transcript	38.6146	16.5595	28.4696	50.3375	45.0682	63.9335	27.8812	53.1131	1.90498	0.929772	0.041171	0.105022
ENSMUST00000148386.1	Pex16	Pex16-202	chr2:92375559-92376703	+	processed_transcript	12.3879	31.3806	8.1296	33.4741	29.6548	25.3262	17.2994	29.485	1.7044	0.769263	0.180669	0.298234
ENSMUST00000132854.1	Rmnd5b	Rmnd5b-202	chr11:51629332-51635753	-	processed_transcript	47.1418	39.2817	13.2601	60.2751	42.3573	75.4849	33.2279	59.3724	1.78683	0.837398	0.135587	0.245715
ENSMUST00000155768.1	Cobll1	Cobll1-211	chr2:65099158-65105859	-	processed_transcript	25.44	6.33933	19.8595	39.2995	27.9958	22.8112	17.213	30.0355	1.74494	0.803175	0.161343	0.27629
ENSMUST00000124845.7	Sgsm3	Sgsm3-201	chr15:80977799-81012289	+	processed_transcript	18.0544	26.3335	51.6886	21.8195	138.931	63.47	32.0255	74.7402	2.33377	1.22266	0.297994	0.429432
ENSMUST00000149513.1	AI314180	AI314180-210	chr4:58810625-58811842	-	processed_transcript	101.292	175.956	202.101	276.146	463.547	219.155	159.783	319.616	2.00031	1.00023	0.115603	0.219859
ENSMUST00000152083.1	Epn1	Epn1-204	chr7:5083665-5095201	+	processed_transcript	26.9789	52.6009	28.3818	62.8101	94.9309	52.4497	35.9872	70.0636	1.9469	0.961181	0.0892324	0.181564
ENSMUST00000226161.1	Stk24	Stk24-203	chr14:121302289-121359868	-	processed_transcript	31.6374	35.8517	1.95878	26.3084	32.5884	20.0471	23.1493	26.3147	1.13674	0.184896	0.792613	0.856722
ENSMUST00000131651.7	Wdr73	Wdr73-202	chr7:80893061-80900719	-	processed_transcript	17.4054	1	1	134.514	1	1	6.46845	45.5047	7.03487	2.81452	0.433113	0.555364
ENSMUST00000214735.1	Zc3h4	Zc3h4-204	chr7:16400910-16416973	+	processed_transcript	291.576	287.36	210.266	725.649	399.913	468.591	263.067	531.384	2.01996	1.01433	0.0590935	0.135571
ENSMUST00000181840.3	9530026P05Rik	9530026P05Rik-203	chr6:92940582-93111749	+	antisense_RNA	65.8469	1	65.9364	19.3398	51.899	33.3302	44.2611	34.8564	0.787517	-0.344617	0.710576	0.791834
ENSMUST00000129016.2	Rhbdd3	Rhbdd3-204	chr11:5100237-5106093	+	processed_transcript	10.6238	37.7612	8.448	7.26368	72.609	49.3413	18.9443	43.0714	2.27358	1.18496	0.321038	0.454324
ENSMUST00000196909.1	Rpf1	Rpf1-202	chr3:146508173-146521051	-	processed_transcript	4.56271	17.2572	22.4661	15.8446	44.5132	19.0519	14.762	26.4699	1.79311	0.842464	0.327815	0.461837
ENSMUST00000146732.1	Hspb6	Hspb6-204	chr7:30553885-30554644	+	processed_transcript	54.5351	86.6477	50.523	283.386	85.132	75.038	63.9019	147.852	2.31373	1.21022	0.289321	0.419936
ENSMUST00000156724.1	Notch4	Notch4-210	chr17:34587041-34587818	+	processed_transcript	35.6036	46.3514	34.0292	691.443	52.4255	11.737	38.6614	251.868	6.51472	2.7037	0.387626	0.516766
ENSMUST00000160601.1	Mapk4	Mapk4-203	chr18:73971170-74065359	-	processed_transcript	43.7232	22.1804	8.72971	53.5123	70.7937	16.8728	24.8778	47.0596	1.89163	0.919633	0.305269	0.43704
ENSMUST00000201985.1	Ccnd2	Ccnd2-207	chr6:127139093-127146688	-	processed_transcript	9.87936	11.3014	8.76059	12.1443	15.1766	39.9902	9.98046	22.437	2.2481	1.1687	0.232059	0.357418
ENSMUST00000127703.2	Brap	Brap-203	chr5:121666526-121687248	+	processed_transcript	130.789	142.479	77.435	166.501	248.997	261.698	116.901	225.732	1.93097	0.949325	0.038834	0.100641
ENSMUST00000133116.1	Pex10	Pex10-204	chr4:155067059-155068023	+	processed_transcript	27.2882	4.37383	29.9806	24.7433	34.7368	31.2375	20.5476	30.2392	1.47167	0.557454	0.324548	0.45826
ENSMUST00000148103.7	Col15a1	Col15a1-209	chr4:47258535-47262299	+	processed_transcript	49.2394	37.9239	30.6637	87.7223	69.2824	70.647	39.2756	75.8839	1.93209	0.950159	0.0103256	0.0427801
ENSMUST00000152177.1	Slc39a3	Slc39a3-203	chr10:81033883-81037250	-	processed_transcript	37.3178	11.8368	11.8718	28.5263	22.4357	60.7207	20.3422	37.2276	1.83007	0.8719	0.311787	0.444603
ENSMUST00000141174.1	Gm14493	Gm14493-201	chrX:10717473-10718710	-	antisense_RNA	39.044	19.4939	28.8367	50.8606	53.0754	59.5814	29.1249	54.5058	1.87145	0.904158	0.0151126	0.054657
ENSMUST00000167646.8	Apoe	Apoe-202	chr7:19696267-19699052	-	processed_transcript	73.1884	84.6222	79.9498	68.1824	410.345	128.075	79.2535	202.201	2.55132	1.35124	0.308824	0.440627
ENSMUST00000148738.1	Stard3	Stard3-204	chr11:98376447-98378229	+	processed_transcript	44.6045	22.1325	33.8625	70.6165	55.2023	61.9122	33.5332	62.577	1.86612	0.900043	0.021056	0.0669699
ENSMUST00000122888.7	Pkp4	Pkp4-204	chr2:59161927-59215031	+	processed_transcript	68.2825	265.637	318.175	329.77	427.705	292.469	217.365	349.982	1.61011	0.687161	0.198326	0.318713
ENSMUST00000139094.1	Zbtb7b	Zbtb7b-207	chr3:89392513-89394776	-	processed_transcript	22.7893	15.6853	11.0477	35.8125	16.4501	47.6573	16.5075	33.3066	2.01767	1.01269	0.158838	0.274143
ENSMUST00000140648.1	Pmp22	Pmp22-205	chr11:63132803-63134489	+	processed_transcript	39.7625	29.2463	24.0696	51.7427	45.491	83.5237	31.0261	60.2525	1.94199	0.957538	0.0819561	0.171184
ENSMUST00000143269.1	Adam11	Adam11-209	chr11:102774117-102776401	+	processed_transcript	17.5584	14.027	1	33.1796	51.9831	1	10.8618	28.7209	2.64421	1.40284	0.319212	0.452756
ENSMUST00000137685.1	Mycbp	Mycbp-203	chr4:123905136-123911242	+	processed_transcript	20.1185	36.71	19.7467	28.5388	61.0081	58.6086	25.5251	49.3851	1.93477	0.952163	0.114328	0.218177
ENSMUST00000138103.1	Aebp1	Aebp1-203	chr11:5869148-5870141	+	processed_transcript	16.5838	18.7111	14.9508	28.8837	41.5727	26.928	16.7485	32.4614	1.93817	0.954692	0.02909	0.0831283
ENSMUST00000179222.1	Crnde	Crnde-204	chr8:92346932-92355869	-	lincRNA	51.4583	50.8223	89.4787	116.841	95.787	145.544	63.9198	119.391	1.86782	0.901356	0.0450683	0.111629
ENSMUST00000132955.7	Mrps36	Mrps36-205	chr13:100736129-100744131	-	processed_transcript	37.2563	4.92128	8.78614	1	107.934	103.709	16.9879	70.8811	4.17245	2.06089	0.213013	0.335887
ENSMUST00000218597.1	Max	Max-204	chr12:76938747-76961921	-	processed_transcript	34.2738	13.6298	39.0574	83.797	19.7112	76.6447	28.987	60.0509	2.07165	1.05078	0.225969	0.350179
ENSMUST00000218897.1	Lsm7	Lsm7-205	chr10:80852833-80855168	-	processed_transcript	4.9628	7.24443	9.63428	62.2296	6.44671	5.98067	7.2805	24.8857	3.41813	1.77321	0.400261	0.526505
ENSMUST00000220292.1	Bcl9l	Bcl9l-205	chr9:44498307-44500808	+	processed_transcript	31.6541	12.4432	11.0834	20.2747	25.421	58.3222	18.3936	34.6726	1.88504	0.914597	0.298736	0.429886
ENSMUST00000147648.1	Ndufb10	Ndufb10-206	chr17:24722682-24724394	-	processed_transcript	42.7164	16.8716	29.2883	58.7231	55.0912	44.8219	29.6254	52.8788	1.78491	0.835852	0.0529183	0.125283
ENSMUST00000149010.1	Sec16a	Sec16a-204	chr2:26410289-26413052	-	processed_transcript	43.6881	24.4583	2.7543	26.8134	18.9129	39.8385	23.6336	28.5216	1.20682	0.271215	0.731946	0.807433
ENSMUST00000182189.1	Myo18b	Myo18b-202	chr5:112688878-112765931	-	processed_transcript	42.8772	59.806	40.1519	85.9094	93.92	87.4728	47.6117	89.1007	1.8714	0.904121	0.00330476	0.0228387
ENSMUST00000149837.1	Ebna1bp2	Ebna1bp2-205	chr4:118620850-118621662	+	processed_transcript	15.1798	15.3708	32.4324	39.5126	17.8769	73.3964	20.9943	43.5953	2.07653	1.05417	0.257707	0.385947
ENSMUST00000179687.1	Brd2	Brd2-212	chr17:34119867-34122634	-	processed_transcript	16.8665	130.56	79.8562	65.739	137.989	132.36	75.761	112.029	1.47872	0.56435	0.418451	0.542501
ENSMUST00000177828.1	Brd2	Brd2-211	chr17:34119558-34122619	-	processed_transcript	7.84884	32.0232	11.4153	34.6508	18.2397	30.9642	17.0958	27.9516	1.635	0.709287	0.295435	0.426477
ENSMUST00000129937.1	Col16a1	Col16a1-205	chr4:130079010-130080620	+	processed_transcript	11.9533	13.1458	8.46583	20.585	31.1581	14.0588	11.1883	21.934	1.96044	0.971175	0.106501	0.206684
ENSMUST00000132230.1	Akirin2	Akirin2-202	chr4:34550951-34562769	+	processed_transcript	90.2665	59.8697	89.8695	128.167	183.115	140.248	80.0019	150.51	1.88133	0.911755	0.0223472	0.0694115
ENSMUST00000132778.7	AU022252	AU022252-202	chr4:119203570-119232708	-	processed_transcript	10.0984	20.6307	6.89931	28.5457	25.9483	13.0798	12.5428	22.5246	1.79582	0.844641	0.189953	0.309704
ENSMUST00000137811.7	Rpl24	Rpl24-204	chr16:55966421-55971435	+	processed_transcript	70.7405	72.037	746.393	275.148	308.709	299.825	296.39	294.561	0.993828	-0.0089318	0.993909	0.994698
ENSMUST00000133294.1	Rftn2	Rftn2-204	chr1:55203945-55206489	-	processed_transcript	4.59765	20.6285	19.2546	25.469	20.774	23.101	14.8269	23.1147	1.55896	0.640588	0.193329	0.31298
ENSMUST00000126246.1	Rpl35	Rpl35-202	chr2:39004612-39005122	-	processed_transcript	45.1635	41.6094	40.344	149.533	68.8334	49.2763	42.3723	89.2142	2.10548	1.07415	0.201961	0.322089
ENSMUST00000127172.1	Heyl	Heyl-202	chr4:123239757-123245989	+	processed_transcript	22.5089	51.0388	48.1777	94.9863	44.6723	87.2072	40.5751	75.6219	1.86375	0.898208	0.124562	0.231225
ENSMUST00000142440.1	Rpl11	Rpl11-206	chr4:136050633-136052706	-	processed_transcript	252.562	127.262	302.553	556.486	330.239	345.851	227.459	410.858	1.8063	0.853036	0.110273	0.211964
ENSMUST00000139131.2	Fscn1	Fscn1-205	chr5:142964533-142970674	+	processed_transcript	29.0939	9.31494	7.1401	12.0793	27.5517	38.0002	15.183	25.8771	1.70435	0.769219	0.356521	0.490617
ENSMUST00000130690.1	Slc50a1	Slc50a1-204	chr3:89269145-89270227	-	processed_transcript	19.0843	14.5462	15.9074	34.4693	18.5072	44.6197	16.5126	32.5321	1.97013	0.978292	0.106553	0.206706
ENSMUST00000140117.1	Pla2g5	Pla2g5-208	chr4:138804579-138819228	-	processed_transcript	17.487	46.572	19.1965	17.4722	146.765	39.0599	27.7518	67.7656	2.44185	1.28797	0.385224	0.514791
ENSMUST00000176357.1	Pan3	Pan3-204	chr5:147453258-147492524	+	processed_transcript	26.6756	8.89174	29.0927	41.6059	41.543	25.5029	21.5534	36.2173	1.68035	0.748765	0.152871	0.26677
ENSMUST00000200302.1	Ttyh3	Ttyh3-206	chr5:140648471-140648997	-	processed_transcript	14.1686	29.6184	12.7997	15.0589	53.1366	42.7345	18.8622	36.9767	1.96036	0.971118	0.223228	0.346998
ENSMUST00000127853.7	Arfip2	Arfip2-205	chr7:105635624-105637902	-	processed_transcript	33.7751	24.5783	193.466	134.264	37.5523	201.877	83.9398	124.564	1.48397	0.569466	0.605921	0.70761
ENSMUST00000124548.7	Acot7	Acot7-204	chr4:152185765-152217796	+	processed_transcript	17.1527	12.1611	17.9481	26.5187	26.1652	34.049	15.754	28.911	1.83516	0.875903	0.0138772	0.0518262
ENSMUST00000130835.7	Prpsap1	Prpsap1-202	chr11:116478292-116490289	-	processed_transcript	88.0277	173.704	67.7928	303.284	77.9184	276.292	109.841	219.165	1.99528	0.996594	0.234237	0.360112
ENSMUST00000127067.7	Fancg	Fancg-205	chr4:43003260-43006511	-	processed_transcript	1	1	15.0968	1	1	94.9044	5.69894	32.3015	5.66797	2.50283	0.447952	0.567601
ENSMUST00000146822.1	Crat	Crat-210	chr2:30413045-30414339	-	processed_transcript	26.5619	171.84	29.0965	542.821	60.0599	25.5831	75.8328	209.488	2.7625	1.46597	0.484607	0.599571
ENSMUST00000212450.1	Gm33023	Gm33023-202	chr8:104630832-104636492	+	antisense_RNA	64.1287	51.3161	54.8846	135.276	99.7899	83.8037	56.7764	106.29	1.87208	0.90464	0.0342705	0.0925266
ENSMUST00000129626.7	Prrc2b	Prrc2b-205	chr2:32219530-32222319	+	processed_transcript	14.7763	16.1012	10.9385	29.5483	26.2785	20.8491	13.9387	25.5587	1.83365	0.87472	0.0173951	0.0593742
ENSMUST00000154087.1	Stat5a	Stat5a-207	chr11:100860485-100877308	+	processed_transcript	13.3165	48.3851	31.447	32.5663	58.5881	66.0531	31.0495	52.4025	1.68771	0.755065	0.210618	0.333049
ENSMUST00000152213.2	Orai1	Orai1-203	chr5:123015338-123029490	+	processed_transcript	19.9354	15.3676	17.3801	32.1175	22.2871	45.9786	17.5611	33.4611	1.90541	0.930105	0.0855309	0.176456
ENSMUST00000151602.3	Mical3	Mical3-207	chr6:120934781-120958635	-	processed_transcript	92.6397	154.174	195.671	469.111	77.9125	471.099	147.495	339.374	2.30092	1.20221	0.225752	0.350166
ENSMUST00000225954.1	Riok1	Riok1-211	chr13:38037270-38043058	+	processed_transcript	4.25168	6.91855	9.03919	50.7587	1	32.2622	6.73647	28.007	4.15751	2.05572	0.218532	0.341172
ENSMUST00000152982.1	Rps10	Rps10-206	chr17:27634155-27635244	-	processed_transcript	74.2471	43.7919	75.7562	129.43	187.593	62.1621	64.5984	126.395	1.95663	0.96837	0.176581	0.292926
ENSMUST00000177247.8	Pou6f1	Pou6f1-207	chr15:100586616-100599864	-	processed_transcript	43.0666	26.0787	22.4206	40.7432	76.4508	48.7235	30.522	55.3058	1.812	0.857583	0.119543	0.225395
ENSMUST00000134237.1	Mrps18a	Mrps18a-204	chr17:46122803-46128870	+	processed_transcript	102.238	96.7825	71.7368	223.892	53.6814	354.341	90.2525	210.638	2.33387	1.22273	0.241111	0.367984
ENSMUST00000140511.1	Rrbp1	Rrbp1-206	chr2:143950492-143955182	-	processed_transcript	38.0826	27.4092	38.1088	74.6616	53.4711	59.5814	34.5335	62.5714	1.8119	0.857505	0.0179118	0.060361
ENSMUST00000156263.1	Rad23b	Rad23b-204	chr4:55350090-55381116	+	processed_transcript	133.076	68.7586	159.416	233.352	133.972	278.361	120.417	215.229	1.78736	0.837832	0.133342	0.24287
ENSMUST00000127235.1	Trim47	Trim47-203	chr11:116106339-116107740	-	processed_transcript	23.2416	25.2977	30.7729	51.9696	39.2046	52.9168	26.4374	48.0303	1.81676	0.861365	0.012123	0.047272
ENSMUST00000182399.7	Sh3d19	Sh3d19-202	chr3:86040723-86083571	+	processed_transcript	53.8371	2.40126	56.254	44.1448	55.307	17.7367	37.4975	39.0628	1.04175	0.0590031	0.943615	0.960584
ENSMUST00000146533.1	Pex13	Pex13-204	chr11:23656086-23665673	-	processed_transcript	95.2098	49.7144	89.739	122.158	130.126	158.936	78.2211	137.073	1.75238	0.809317	0.0317475	0.0882206
ENSMUST00000133065.1	Cav1	Cav1-208	chr6:17307723-17327259	+	processed_transcript	16.2236	19.6786	17.7953	44.7542	30.0901	25.0537	17.8992	33.2993	1.86038	0.8956	0.0619958	0.139872
ENSMUST00000142020.7	Zbtb17	Zbtb17-204	chr4:141444699-141467225	+	processed_transcript	61.8413	182.399	11.3172	175.919	199.84	21.5208	85.1858	132.427	1.55456	0.636509	0.565364	0.671295
ENSMUST00000224276.1	AC121599.1	AC121599.1-201	chr14:20794239-20796560	+	lincRNA	59.176	20.0913	21.3034	57.5914	38.9893	66.4495	33.5235	54.3434	1.62105	0.69693	0.241838	0.368536
ENSMUST00000222773.1	Zfp410	Zfp410-214	chr12:84317145-84331697	+	processed_transcript	14.8687	1	1	1	87.5616	1	5.62291	29.8539	5.30933	2.40853	0.453603	0.571742
ENSMUST00000127441.1	Gm14321	Gm14321-201	chr2:167777536-167782126	+	lincRNA	15.6405	23.8149	9.73864	31.3592	17.637	38.4177	16.398	29.138	1.77692	0.829379	0.15763	0.272432
ENSMUST00000115538.4	Mrpl15	Mrpl15-202	chr1:4776377-4785739	-	processed_transcript	28.1864	1	1	1	1	164.756	10.0621	55.5853	5.5242	2.46577	0.456884	0.574727
ENSMUST00000146567.1	Cgnl1	Cgnl1-205	chr9:71632633-71648350	-	processed_transcript	36.3911	3.51491	35.5268	28.1102	38.8454	24.2543	25.1443	30.4033	1.20915	0.273998	0.675469	0.76679
ENSMUST00000125391.1	Sertad4	Sertad4-202	chr1:192854202-192855486	-	processed_transcript	26.1723	15.8976	15.0382	36.1592	24.5477	41.0344	19.0361	33.9138	1.78155	0.833137	0.0700135	0.152828
ENSMUST00000159293.7	Marc2	Marc2-202	chr1:184819236-184845808	-	processed_transcript	76.486	86.8005	28.3368	131.711	117.087	70.847	63.8745	106.548	1.66809	0.738194	0.172306	0.288301
ENSMUST00000155896.1	Sema4d	Sema4d-213	chr13:51725423-51793664	-	processed_transcript	16.1357	35.9681	3.04023	23.9151	38.457	11.1044	18.3813	24.4922	1.33245	0.414077	0.648271	0.744809
ENSMUST00000134073.1	Vwf	Vwf-206	chr6:125603550-125642924	+	processed_transcript	6.47425	8.47428	7.25496	3.38457	101.993	6.66671	7.40116	37.3481	5.04625	2.33521	0.406877	0.532151
ENSMUST00000179029.1	Crnde	Crnde-203	chr8:92326250-92355891	-	lincRNA	31.5917	35.5513	12.7989	75.4996	31.2344	34.9051	26.6473	47.213	1.77177	0.825195	0.263565	0.392504
ENSMUST00000153195.1	Hdac10	Hdac10-208	chr15:89125979-89127490	-	processed_transcript	35.6415	44.8685	19.7599	50.5772	74.8943	47.6703	33.4233	57.7139	1.72676	0.788065	0.0985539	0.195171
ENSMUST00000192300.1	Jade1	Jade1-207	chr3:41602430-41604807	+	processed_transcript	17.5593	14.5983	8.72453	13.8437	24.1883	38.1146	13.6274	25.3822	1.86259	0.897308	0.19191	0.311483
ENSMUST00000151854.1	Hspa4	Hspa4-203	chr11:53264247-53300411	-	processed_transcript	63.6787	97.2824	125.92	246.689	205.353	87.1311	95.6271	179.724	1.87943	0.910293	0.175038	0.291325
ENSMUST00000138957.1	Dab2ip	Dab2ip-210	chr2:35661619-35709933	+	processed_transcript	46.9412	85.0488	52.4401	114.004	150.216	69.1051	61.4767	111.109	1.80733	0.853859	0.132204	0.241846
ENSMUST00000138739.7	Mrps15	Mrps15-203	chr4:126046977-126051965	+	processed_transcript	84.5634	124.014	129.776	161.349	247.153	192.352	112.784	200.285	1.77582	0.828485	0.0385862	0.10036
ENSMUST00000123664.1	Ptpn3	Ptpn3-202	chr4:57218347-57222054	-	processed_transcript	32.2493	37.2836	40.1695	96.3244	40.3647	69.9926	36.5674	68.8939	1.88402	0.913817	0.118832	0.224643
ENSMUST00000135915.7	Paxx	Paxx-210	chr2:25459484-25461072	-	processed_transcript	7.72198	21.0744	27.1342	45.7722	35.8493	15.0834	18.6435	32.235	1.72902	0.789951	0.273111	0.402909
ENSMUST00000132694.1	Mavs	Mavs-204	chr2:131241934-131245665	+	processed_transcript	17.491	12.4083	22.8993	25.7024	57.6188	18.6654	17.5995	33.9955	1.93162	0.94981	0.255389	0.383845
ENSMUST00000156470.1	Slc12a6	Slc12a6-208	chr2:112354202-112356887	+	processed_transcript	24.4467	28.8017	34.5938	64.6195	39.5001	52.928	29.2807	52.3492	1.78784	0.838216	0.0421243	0.106913
ENSMUST00000140778.1	Rabl6	Rabl6-205	chr2:25587445-25589159	-	processed_transcript	10.4358	14.3397	15.7413	27.8638	17.0129	27.5352	13.5056	24.1373	1.78721	0.837706	0.0526936	0.125045
ENSMUST00000135265.1	Psmd14	Psmd14-204	chr2:61711742-61720851	+	processed_transcript	11.2183	24.6493	29.7188	10.8321	66.0165	63.6349	21.8622	46.8278	2.14196	1.09893	0.255702	0.383858
ENSMUST00000097867.8	Col16a1	Col16a1-202	chr4:130047885-130093502	+	processed_transcript	50.5026	15.2138	45.7277	48.5982	92.1531	43.3587	37.148	61.37	1.65204	0.724248	0.27159	0.401369
ENSMUST00000135117.1	Atp13a2	Atp13a2-204	chr4:140996212-141000873	+	processed_transcript	9.27591	34.1298	11.0003	50.6822	22.4138	16.9092	18.1353	30.0017	1.65433	0.726244	0.418769	0.542633
ENSMUST00000142524.7	Ahdc1	Ahdc1-206	chr4:133012092-133061776	+	processed_transcript	100.27	67.4791	52.7672	94.6053	118.896	174.93	73.5054	129.477	1.76146	0.816774	0.112648	0.215623
ENSMUST00000116010.2	H2-Q5	H2-Q5-201	chr17:35397330-35397800	+	processed_transcript	50.1755	32.8938	81.8948	88.6353	105.605	79.3036	54.9881	91.1813	1.6582	0.72962	0.0903398	0.183299
ENSMUST00000214135.1	AC150314.2	AC150314.2-201	chr10:84440826-84467009	+	bidirectional_promoter_lncRNA	28.3621	51.8986	35.2384	58.2616	47.9287	101.806	38.4997	69.332	1.80085	0.848674	0.160562	0.275515
ENSMUST00000134880.7	Ppara	Ppara-204	chr15:85734983-85777632	+	processed_transcript	23.1482	14.8749	39.461	27.9912	61.1247	43.4535	25.828	44.1898	1.71092	0.774777	0.200458	0.320403
ENSMUST00000134240.1	Ccl19	Ccl19-202	chr4:42754525-42756577	-	processed_transcript	16.02	13.3946	9.84825	17.2283	18.6677	35.7498	13.0876	23.8819	1.82477	0.867716	0.15724	0.272039
ENSMUST00000135685.1	Mcm8	Mcm8-203	chr2:132816224-132818025	+	processed_transcript	25.1561	5.59753	7.52441	53.1597	16.954	6.36062	12.7594	25.4914	1.99786	0.998457	0.456858	0.574838
ENSMUST00000128444.1	Szrd1	Szrd1-204	chr4:141116567-141139740	-	processed_transcript	50.1425	27.1753	36.8508	102.368	52.8784	50.0527	38.0562	68.4332	1.79821	0.846563	0.171257	0.287406
ENSMUST00000144055.1	Rnf185	Rnf185-203	chr11:3417876-3452334	-	processed_transcript	1	25.3168	15.9477	16.8567	1	128.822	14.0882	48.8928	3.47048	1.79514	0.442155	0.563659
ENSMUST00000154642.1	Minos1	Minos1-204	chr4:139103902-139130994	-	processed_transcript	395.174	425.239	230.123	477.943	620.11	695.145	350.179	597.733	1.70694	0.771409	0.0480861	0.117373
ENSMUST00000149166.7	Slc11a1	Slc11a1-209	chr1:74383341-74384173	+	processed_transcript	8.2522	9.67175	5.433	2.94559	79.0523	9.73722	7.78565	30.5784	3.92753	1.97362	0.402208	0.527689
ENSMUST00000156965.1	Gm15598	Gm15598-201	chr17:27988028-28008432	-	antisense_RNA	23.4267	11.1428	9.59488	13.8508	33.8135	27.5891	14.7215	25.0845	1.70394	0.768872	0.23101	0.356129
ENSMUST00000125394.1	Pithd1	Pithd1-204	chr4:135986414-135987087	-	processed_transcript	8.12075	25.0593	8.72302	16.8101	11.9628	45.3394	13.9677	24.7041	1.76866	0.822654	0.414299	0.53892
ENSMUST00000129334.7	9030624J02Rik	9030624J02Rik-205	chr7:118740732-118784055	+	processed_transcript	4.26587	8.45973	10.6626	80.6872	5.14502	4.76045	7.79608	30.1976	3.87343	1.95361	0.426188	0.548439
ENSMUST00000132093.7	Rangrf	Rangrf-202	chr11:68972484-68973789	-	processed_transcript	28.7574	53.8292	34.5991	117.67	50.945	45.8607	39.0619	71.4917	1.83022	0.872015	0.253637	0.381782
ENSMUST00000129716.1	Nelfcd	Nelfcd-203	chr2:174415880-174422672	+	processed_transcript	10.9037	57.0254	28.0205	78.5659	35.6973	31.8376	31.9832	48.7003	1.52268	0.606615	0.45308	0.571368
ENSMUST00000153116.1	Rnf38	Rnf38-216	chr4:44152434-44233789	-	processed_transcript	36.7782	93.8404	97.0695	72.7444	161.417	146.093	75.896	126.752	1.67007	0.739908	0.205217	0.326043
ENSMUST00000140529.1	Dvl1	Dvl1-204	chr4:155853410-155853951	+	processed_transcript	8.94085	18.8476	14.7857	15.4908	46.9141	17.4967	14.1914	26.6339	1.87676	0.908246	0.303832	0.435727
ENSMUST00000151615.1	Smap2	Smap2-202	chr4:120971890-120975708	-	processed_transcript	24.0616	14.1827	12.8757	31.2135	67.9697	10.5643	17.04	36.5825	2.14686	1.10223	0.318217	0.451727
ENSMUST00000142735.7	Rpl22	Rpl22-205	chr4:152325742-152332476	+	processed_transcript	36.7318	36.7298	32.5519	26.6814	65.3695	128.357	35.3378	73.4692	2.07905	1.05593	0.267985	0.397675
ENSMUST00000152828.1	Pisd-ps1	Pisd-ps1-204	chr11:3128972-3130146	+	processed_transcript	25.7138	20.1367	17.389	25.9373	44.1401	39.9344	21.0799	36.6706	1.7396	0.798759	0.0607685	0.138155
ENSMUST00000166136.1	Snd1	Snd1-205	chr6:28848907-28880308	+	processed_transcript	58.0621	100.834	22.2474	105.478	48.684	128.754	60.3813	94.3053	1.56183	0.643238	0.36056	0.49442
ENSMUST00000172462.1	Ube2i	Ube2i-202	chr17:25272663-25273259	-	processed_transcript	53.2686	31.4459	35.4501	68.4404	63.2491	69.5884	40.0549	67.0926	1.67502	0.744176	0.0179805	0.060471
ENSMUST00000162526.1	Gm10435	Gm10435-202	chr11:59002910-59007293	+	antisense_RNA	46.9955	201.378	217.808	241.518	108.34	399.549	155.394	249.802	1.60754	0.684858	0.399524	0.526361
ENSMUST00000146160.1	Cacna1g	Cacna1g-215	chr11:94411481-94417187	-	processed_transcript	1	1	17.8089	1	89.8566	1	6.60296	30.6189	4.63715	2.21324	0.470236	0.587125
ENSMUST00000130118.1	Ewsr1	Ewsr1-207	chr11:5069974-5070891	-	processed_transcript	480.55	187.801	904.262	966.321	548.234	776.735	524.204	763.763	1.457	0.542997	0.375662	0.504958
ENSMUST00000154140.7	C130080G10Rik	C130080G10Rik-203	chr2:114054335-114061463	+	antisense_RNA	403.528	438.307	309.762	466.855	923.245	639.465	383.865	676.522	1.76239	0.817535	0.102091	0.200521
ENSMUST00000164440.1	Cic	Cic-205	chr7:25279641-25284932	+	processed_transcript	46.6858	27.2681	40.7101	86.0528	39.8612	75.8144	38.2213	67.2428	1.7593	0.815002	0.127683	0.235456
ENSMUST00000141211.1	Naa10	Naa10-209	chrX:73917092-73919907	-	processed_transcript	37.7518	43.4906	50.1119	142.618	70.4891	40.9447	43.7847	84.684	1.9341	0.951661	0.249804	0.377818
ENSMUST00000156809.1	Gm13938	Gm13938-201	chr2:76722776-76786708	+	antisense_RNA	39.496	13.232	47.084	56.9286	27.7376	77.9229	33.2706	54.1964	1.62895	0.703946	0.30501	0.436793
ENSMUST00000156645.1	Stat3	Stat3-214	chr11:100893971-100899307	-	processed_transcript	31.8283	7.99239	13.9542	12.1635	62.6901	23.2659	17.9249	32.7065	1.82464	0.86761	0.43166	0.553782
ENSMUST00000156061.1	Atp6v0c	Atp6v0c-206	chr17:24164538-24169066	-	processed_transcript	17.4789	51.4279	25.5411	53.6972	45.1016	47.1859	31.4827	48.6616	1.54566	0.628226	0.179199	0.29639
ENSMUST00000203718.1	Gm44148	Gm44148-201	chr6:121255203-121272685	-	lincRNA	35.5291	12.9713	26.6843	31.7151	55.3086	34.8141	25.0616	40.6126	1.62051	0.69645	0.191041	0.310372
ENSMUST00000181920.1	Gm26885	Gm26885-201	chr17:29461896-29491925	-	lincRNA	27.2873	24.2529	46.8049	45.4116	63.9891	52.6337	32.7817	54.0114	1.64761	0.720374	0.0754911	0.160882
ENSMUST00000130932.1	Brd3	Brd3-205	chr2:27452996-27475653	-	processed_transcript	38.2987	21.4713	20.5657	114.806	16.7973	43.2993	26.7786	58.301	2.17715	1.12244	0.350267	0.483333
ENSMUST00000127832.1	Nfyb	Nfyb-201	chr10:82752416-82763663	-	processed_transcript	27.2951	86.6349	52.2844	75.6015	123.401	65.2217	55.4048	88.0747	1.58966	0.668718	0.258701	0.386747
ENSMUST00000126713.1	Faap20	Faap20-204	chr4:155249861-155250952	+	processed_transcript	19.18	1	8.33664	51.8872	1	15.0867	9.50553	22.658	2.38366	1.25318	0.458865	0.576499
ENSMUST00000218924.1	Palm	Palm-206	chr10:79806026-79809589	+	processed_transcript	333.327	324.376	362.139	1032.39	342.273	542.488	339.948	639.05	1.87985	0.910617	0.218874	0.3416
ENSMUST00000143306.1	C920021L13Rik	C920021L13Rik-203	chr3:95871531-95874890	+	antisense_RNA	23.1219	31.709	24.7556	29.5851	37.8501	79.2577	26.5288	48.8976	1.84319	0.882205	0.224666	0.348804
ENSMUST00000130711.7	Psen2	Psen2-208	chr1:180227004-180230065	-	processed_transcript	20.8297	44.5661	1.97367	30.0458	19.1616	15.5471	22.4565	21.5848	0.961184	-0.0571151	0.950027	0.964772
ENSMUST00000156102.1	Tiprl	Tiprl-203	chr1:165228364-165236932	-	processed_transcript	23.132	60.4769	31.9779	50.5709	43.2473	98.7791	38.5289	64.1991	1.66626	0.736611	0.283611	0.413316
ENSMUST00000140003.1	BC037032	BC037032-201	chr15:4022371-4027402	-	antisense_RNA	52.6268	13.5268	43.893	49.2231	52.9723	57.6993	36.6822	53.2983	1.45297	0.539008	0.241632	0.368444
ENSMUST00000138942.1	Cntnap1	Cntnap1-202	chr11:101170523-101178316	+	processed_transcript	22.6216	18.2276	5.61878	14.6329	18.5195	41.0769	15.4893	24.7431	1.59743	0.675754	0.393725	0.521722
ENSMUST00000128992.1	Stk11	Stk11-204	chr10:80116354-80117814	+	processed_transcript	37.0665	78.6251	33.0709	151.747	23.0677	132.18	49.5875	102.332	2.06366	1.0452	0.283367	0.413199
ENSMUST00000139926.1	Scrn3	Scrn3-204	chr2:73312676-73322022	+	processed_transcript	1	1	23.2452	1	111.591	1	8.41508	37.8635	4.49949	2.16976	0.477303	0.593741
ENSMUST00000196778.1	Sart3	Sart3-203	chr5:113755407-113761254	-	processed_transcript	29.6386	6.61869	24.8133	29.457	39.6452	19.9837	20.3569	29.6953	1.45874	0.544719	0.358993	0.492808
ENSMUST00000128225.7	Cln3	Cln3-208	chr7:126579211-126583226	-	processed_transcript	10.9938	7.7422	24.7393	50.7629	15.52	12.5795	14.4918	26.2875	1.81396	0.859139	0.426113	0.548481
ENSMUST00000145551.1	Selenbp1	Selenbp1-205	chr3:94933159-94938075	+	processed_transcript	15.9853	20.1671	1	51.3511	1	29.5469	12.3842	27.2993	2.20438	1.14037	0.395814	0.523389
ENSMUST00000149212.1	Socs7	Socs7-202	chr11:97377437-97378667	+	processed_transcript	124.504	82.0933	85.2704	151.984	241.979	111.357	97.2891	168.44	1.73134	0.791887	0.157164	0.271999
ENSMUST00000149558.1	C1qtnf12	C1qtnf12-203	chr4:155964561-155965182	+	processed_transcript	29.3649	33.7076	49.6356	64.4046	50.8478	70.0631	37.5694	61.7718	1.64421	0.717391	0.0448754	0.111206
ENSMUST00000149164.1	Anpep	Anpep-203	chr7:79842614-79848193	-	processed_transcript	33.4012	11.2997	12.3446	44.9581	40.5898	11.8882	19.0152	32.4787	1.70804	0.772344	0.346354	0.479509
ENSMUST00000138936.1	Rps17	Rps17-204	chr7:81344704-81345224	-	processed_transcript	164.416	99.1535	66.5746	165.619	173.56	174.213	110.048	171.131	1.55506	0.636966	0.102052	0.200522
ENSMUST00000200223.1	Enoph1	Enoph1-204	chr5:100061971-100064197	+	processed_transcript	26.9741	18.2063	11.9581	21.7761	43.0975	28.689	19.0462	31.1875	1.63747	0.711468	0.187343	0.306639
ENSMUST00000217898.1	Bcl9l	Bcl9l-202	chr9:44482866-44500800	+	processed_transcript	418.867	486.077	360.874	657.841	724.326	705.166	421.939	695.778	1.649	0.721593	0.00266485	0.0211426
ENSMUST00000125158.1	Gm15270	Gm15270-201	chr10:24595249-24597108	-	processed_transcript	107.196	119.642	63	163.752	144.176	156.446	96.6126	154.791	1.60219	0.680043	0.0325117	0.089505
ENSMUST00000127558.1	Ptp4a2	Ptp4a2-202	chr4:129820680-129839196	+	processed_transcript	91.1155	47.5997	28.3086	100.904	48.7961	113.658	55.6746	87.786	1.57677	0.656972	0.30284	0.434675
ENSMUST00000140270.1	Tdrd7	Tdrd7-203	chr4:45990163-46005592	+	processed_transcript	61.204	38.3133	44.1162	55.1042	92.8866	92.0684	47.8779	80.0197	1.67133	0.740997	0.0867807	0.178231
ENSMUST00000227491.1	Hivep3	Hivep3-210	chr4:120032766-120065063	+	processed_transcript	12.7397	13.4221	11.0301	19.9358	35.1999	12.1968	12.3973	22.4442	1.8104	0.856312	0.213346	0.336308
ENSMUST00000137317.7	Commd3	Commd3-206	chr2:18672523-18674400	+	processed_transcript	23.7906	18.0101	27.5114	32.84	75.798	21.3718	23.104	43.3366	1.87572	0.907441	0.294703	0.425907
ENSMUST00000161593.1	Glud1	Glud1-203	chr14:34335372-34341957	+	processed_transcript	30.8748	28.9139	24.8864	50.5819	51.1769	38.565	28.225	46.7746	1.6572	0.728751	0.0142687	0.0527795
ENSMUST00000135980.1	A930004D18Rik	A930004D18Rik-202	chr2:18027926-18028760	-	processed_transcript	1	22.98	3.11298	140.924	1	2.27018	9.03099	48.0646	5.32219	2.41202	0.452556	0.571136
ENSMUST00000142480.1	Prpsap1	Prpsap1-205	chr11:116471400-116477739	-	processed_transcript	73.5378	131.486	101.803	186.433	89.7606	262.824	102.276	179.673	1.75675	0.812908	0.216524	0.339195
ENSMUST00000132776.1	Tnip1	Tnip1-210	chr11:54940613-54962909	-	processed_transcript	14.2605	23.9103	14.7345	49.5633	32.8828	13.7728	17.6351	32.073	1.8187	0.862908	0.25247	0.380593
ENSMUST00000139460.1	Top2a	Top2a-203	chr11:98993467-98995370	-	processed_transcript	34.1932	62.5116	27.5619	53.9556	70.2886	69.0785	41.4222	64.4409	1.55571	0.637571	0.126026	0.233168
ENSMUST00000138674.1	Rgs3	Rgs3-210	chr4:62674352-62690001	+	processed_transcript	57.3267	17.9682	28.0759	39.8418	58.342	55.2361	34.457	51.14	1.48417	0.569656	0.272256	0.402118
ENSMUST00000145609.1	Brd7	Brd7-205	chr8:88333549-88342756	-	processed_transcript	25.9626	17.2778	31.3658	52.2121	26.1131	45.7726	24.8688	41.3659	1.66337	0.734108	0.136007	0.24621
ENSMUST00000162559.1	Bace1	Bace1-205	chr9:45839918-45854707	+	processed_transcript	36.7802	3.06877	44.8564	34.8249	30.7477	20.9454	28.2351	28.8393	1.0214	0.0305456	0.966308	0.976386
ENSMUST00000137956.7	Mta2	Mta2-204	chr19:8942493-8945873	+	processed_transcript	25.8645	25.3616	52.5541	48.1748	39.5982	79.9601	34.5934	55.911	1.61623	0.692636	0.233706	0.359405
ENSMUST00000174178.1	Xylt2	Xylt2-206	chr11:94675963-94677413	-	processed_transcript	34.8273	25.7915	29.1588	66.2194	30.8602	56.7011	29.9258	51.2602	1.71291	0.776448	0.121624	0.22821
ENSMUST00000145696.3	Bet1	Bet1-202	chr6:4081495-4086930	-	processed_transcript	11.876	1	1.36075	1	1	71.421	4.74558	24.4737	5.15715	2.36657	0.45275	0.571239
ENSMUST00000161005.7	Gas5	Gas5-217	chr1:161034607-161038539	+	lincRNA	79.2418	38.2348	53.2511	107.995	67.6481	96.7641	56.9093	90.8024	1.59556	0.674067	0.1165	0.221148
ENSMUST00000135605.7	Slc38a10	Slc38a10-210	chr11:120137970-120151322	-	processed_transcript	25.9915	28.6791	19.1794	31.5959	31.2389	63.3097	24.6167	42.0482	1.70812	0.772408	0.18824	0.307808
ENSMUST00000123962.1	Tgfbr1	Tgfbr1-204	chr4:47353598-47361313	+	processed_transcript	10.9228	18.0318	7.30829	105.353	59.683	1	12.0876	55.3453	4.57867	2.19493	0.227404	0.35197
ENSMUST00000129346.7	Dnajc7	Dnajc7-203	chr11:100582818-100584786	-	processed_transcript	18.2694	19.2042	45.6866	23.8904	39.6819	73.8499	27.7201	45.8074	1.6525	0.72465	0.353985	0.487794
ENSMUST00000149460.7	Egfl7	Egfl7-207	chr2:26586661-26590908	+	processed_transcript	3.67333	37.5161	33.773	30.9813	22.0582	29.7441	24.9874	27.5945	1.10434	0.143179	0.82537	0.882474
ENSMUST00000193051.1	4931440P22Rik	4931440P22Rik-204	chr3:65527489-65529213	-	processed_transcript	5.92189	19.1111	26.8698	32.987	23.587	17.0503	17.3009	24.5414	1.4185	0.504369	0.398441	0.525208
ENSMUST00000153008.7	Edf1	Edf1-205	chr2:25557871-25561361	+	processed_transcript	32.1785	35.8948	39.0439	63.9918	52.8071	58.2107	35.7057	58.3365	1.63381	0.708244	0.00395232	0.0249834
ENSMUST00000124937.1	Cpeb1	Cpeb1-202	chr7:81436224-81455392	-	processed_transcript	220.268	202.451	168.032	411.465	287.913	274.4	196.917	324.592	1.64838	0.721045	0.0507492	0.122215
ENSMUST00000125679.7	Rsrp1	Rsrp1-202	chr4:134923593-134925423	+	processed_transcript	9.57013	26.8428	15.9757	27.5199	50.0416	12.884	17.4629	30.1485	1.72644	0.787797	0.347372	0.48039
ENSMUST00000138125.1	Rhbdf2	Rhbdf2-204	chr11:116601086-116602595	-	processed_transcript	49.5611	26.3363	39.4087	51.0085	57.5096	75.3119	38.4354	61.2767	1.59428	0.672904	0.0822265	0.171535
ENSMUST00000219074.1	Cdc34	Cdc34-206	chr10:79682481-79685261	+	processed_transcript	9.66156	26.8804	12.9292	25.7331	20.4613	27.3248	16.4904	24.5064	1.48611	0.571536	0.230506	0.355678
ENSMUST00000148306.1	Sec16a	Sec16a-203	chr2:26414379-26419756	-	processed_transcript	31.0873	1.81925	6.22239	2.28139	6.63996	99.3421	13.043	36.0878	2.76684	1.46824	0.522694	0.632101
ENSMUST00000130688.1	Smurf2	Smurf2-203	chr11:106824718-106829006	-	processed_transcript	19.8581	19.6447	30.7357	58.343	48.1012	18.1921	23.4128	41.5454	1.77447	0.82739	0.22321	0.347078
ENSMUST00000193579.1	Uck2	Uck2-206	chr1:167237482-167284707	-	processed_transcript	34.0054	13.8272	32.8076	46.503	43.5346	32.4186	26.8801	40.8188	1.51855	0.602695	0.149098	0.262458
ENSMUST00000142689.1	Sh3glb2	Sh3glb2-209	chr2:30345141-30346101	-	processed_transcript	24.3105	33.8979	29.6061	35.8138	71.6512	40.4351	29.2715	49.3001	1.68424	0.752095	0.159077	0.274086
ENSMUST00000145682.1	Ahdc1	Ahdc1-207	chr4:133011565-133055083	+	processed_transcript	185.504	179.217	206.498	276.491	373.071	279.293	190.406	309.618	1.62609	0.701408	0.0220523	0.0689629
ENSMUST00000209626.1	Rpl13a	Rpl13a-203	chr7:45126003-45128735	-	processed_transcript	356.329	449.078	476.082	966.518	436.15	757.462	427.163	720.044	1.68564	0.753298	0.138242	0.248648
ENSMUST00000160190.1	Zmiz1	Zmiz1-203	chr14:25607357-25643657	+	processed_transcript	50.8555	29.2509	42.5508	39.1138	134.847	50.0408	40.8857	74.6673	1.82624	0.86888	0.335737	0.469714
ENSMUST00000126616.1	Amotl2	Amotl2-202	chr9:102728331-102732341	+	processed_transcript	127.007	124.369	102.224	261.83	116.334	220.144	117.867	199.436	1.69205	0.758772	0.137149	0.247389
ENSMUST00000181325.3	E530011L22Rik	E530011L22Rik-201	chr9:121754662-121759943	-	antisense_RNA	35.9022	42.6905	31.0497	59.1379	52.1346	64.0652	36.5475	58.4459	1.59918	0.67733	0.0105846	0.0435663
ENSMUST00000146981.1	4930599N23Rik	4930599N23Rik-201	chr6:39118473-39148312	+	antisense_RNA	31.6536	44.6563	26.2749	51.1186	47.3685	63.6496	34.1949	54.0455	1.58051	0.660393	0.0540237	0.127005
ENSMUST00000135171.1	Snapc4	Snapc4-207	chr2:26362767-26365024	-	processed_transcript	19.2173	41.4597	23.4765	59.9522	34.3979	37.6329	28.0512	43.9943	1.56836	0.649256	0.204758	0.325725
ENSMUST00000123913.7	Myl2	Myl2-204	chr5:122103179-122106848	+	processed_transcript	30031.7	38791.5	39089.2	55937.2	75908.3	44487.3	35970.8	58777.6	1.63404	0.708442	0.0773679	0.163773
ENSMUST00000125459.1	2610507B11Rik	2610507B11Rik-202	chr11:78261752-78264032	+	processed_transcript	59.7975	93.025	78.925	131.554	94.8237	145.625	77.2491	124.001	1.60521	0.682759	0.0597183	0.136507
ENSMUST00000140138.1	Nfe2l1	Nfe2l1-208	chr11:96822223-96824552	-	processed_transcript	67.2142	103.333	50.7804	113.033	117.722	109.54	73.776	113.431	1.53751	0.620596	0.0649684	0.1447
ENSMUST00000210574.1	Tmem143	Tmem143-208	chr7:45908855-45909459	+	processed_transcript	10.3885	12.0585	15.5671	13.5133	53.3313	11.1761	12.6714	26.0069	2.05242	1.03732	0.387465	0.516825
ENSMUST00000143239.1	Shkbp1	Shkbp1-208	chr7:27343144-27348427	-	processed_transcript	10.0129	24.4681	7.59891	34.1083	4.43884	50.7548	14.0266	29.7673	2.1222	1.08556	0.339698	0.472631
ENSMUST00000130058.1	Szt2	Szt2-202	chr4:118363407-118365066	-	processed_transcript	13.9082	1.18043	15.4484	43.6375	18.7646	1.27689	10.179	21.2263	2.0853	1.06025	0.44639	0.56662
ENSMUST00000156119.1	Rnf121	Rnf121-207	chr7:102035325-102065158	-	processed_transcript	52.5585	1	20.6289	1	97.6922	45.7459	24.7291	48.146	1.94694	0.961206	0.501363	0.614716
ENSMUST00000172526.1	BC051226	BC051226-201	chr17:33908185-33909178	-	antisense_RNA	56.3597	37.8282	29.7744	62.5395	39.7149	105.065	41.3208	69.1066	1.67244	0.741957	0.250677	0.378684
ENSMUST00000151746.7	Epb41	Epb41-217	chr4:131923413-131937387	-	processed_transcript	268.898	103.342	92.6224	213.08	155.134	320.08	154.954	229.431	1.48064	0.56622	0.375545	0.505071
ENSMUST00000134201.1	Ccdc97	Ccdc97-205	chr7:25712935-25716106	-	processed_transcript	26.009	40.0739	28.7073	42.8706	53.9944	52.934	31.5967	49.933	1.58032	0.660218	0.0303255	0.0852567
ENSMUST00000145847.1	Socs2	Socs2-210	chr10:95415091-95415999	-	processed_transcript	60.1587	98.2178	96.4874	173.91	87.7443	152.953	84.9546	138.203	1.62678	0.70202	0.137744	0.248018
ENSMUST00000150007.1	Nfkb1	Nfkb1-205	chr3:135590780-135594441	-	processed_transcript	63.7311	59.0307	35.9716	43.1871	113.398	112.823	52.9111	89.8028	1.69724	0.763189	0.211627	0.33433
ENSMUST00000195006.5	Rab23	Rab23-210	chr1:33719887-33723837	+	processed_transcript	1.65872	16.3547	6.56913	72.4777	1	9.92163	8.19418	27.7998	3.39263	1.7624	0.440141	0.561517
ENSMUST00000224569.1	Rps24	Rps24-208	chr14:24490859-24493460	+	processed_transcript	749.404	860.789	1217.5	5195.78	609.291	999.994	942.566	2268.35	2.40657	1.26698	0.419504	0.543027
ENSMUST00000148228.1	Ppp1r8	Ppp1r8-204	chr4:132834698-132843134	-	processed_transcript	9.49698	16.815	20.0175	25.4145	27.4909	18.412	15.4432	23.7725	1.53935	0.622325	0.115293	0.219435
ENSMUST00000129621.1	Rnf38	Rnf38-207	chr4:44149143-44167922	-	processed_transcript	15.2856	30.2416	1	87.0181	21.3581	1	15.5091	36.4588	2.3508	1.23315	0.485526	0.60056
ENSMUST00000198201.4	Nme6	Nme6-207	chr9:109832787-109842956	+	processed_transcript	45.6237	38.0023	68.8177	18.8797	133.328	188.755	50.8146	113.654	2.23665	1.16134	0.284289	0.413944
ENSMUST00000151626.1	Mdn1	Mdn1-210	chr4:32657183-32664170	+	processed_transcript	17.2203	7.90402	19.3637	31.3194	16.9572	19.7458	14.8293	22.6741	1.529	0.612593	0.235993	0.362258
ENSMUST00000155384.1	2900041M22Rik	2900041M22Rik-201	chr11:117611247-117613857	+	processed_transcript	15.0825	17.5955	11.0059	22.711	21.3724	23.9128	14.5613	22.6654	1.55655	0.638354	0.0169204	0.0585072
ENSMUST00000153349.1	Zfyve19	Zfyve19-209	chr2:119211463-119211720	+	processed_transcript	9.39317	8.03737	11.0855	10.63	52.2041	5.98114	9.50534	22.9384	2.41322	1.27096	0.413113	0.537794
ENSMUST00000198649.4	Cnn3	Cnn3-206	chr3:121427282-121450358	+	processed_transcript	26.66	40.1459	42.8849	48.0601	54.1337	69.4719	36.5636	57.2219	1.565	0.64616	0.0634416	0.142433
ENSMUST00000213652.1	Plekho2	Plekho2-203	chr9:65557002-65562164	-	processed_transcript	19.9752	29.1413	24.9735	20.8977	50.7826	53.9297	24.6967	41.87	1.69537	0.7616	0.188759	0.308356
ENSMUST00000160411.1	Zfp27	Zfp27-203	chr7:29900237-29906060	-	processed_transcript	13.0189	10.999	31.805	30.6002	21.0008	27.8798	18.6076	26.4936	1.4238	0.509749	0.335748	0.4696
ENSMUST00000127657.1	Nprl3	Nprl3-207	chr11:32247779-32250278	-	processed_transcript	18.6411	16.6778	28.0984	21.7381	35.1425	44.7241	21.1391	33.8682	1.60216	0.680018	0.16668	0.28293
ENSMUST00000222806.1	Habp4	Habp4-204	chr13:64174100-64182583	+	processed_transcript	36.8926	18.3694	26.5638	65.8423	33.3674	32.0123	27.2753	43.7407	1.60368	0.681382	0.251311	0.379414
ENSMUST00000177429.1	Srsf2	Srsf2-205	chr11:116850108-116851571	-	processed_transcript	13.8293	24.66	1	1	41.9749	31.6433	13.1631	24.8727	1.88958	0.918067	0.452251	0.570894
ENSMUST00000127176.1	Ssna1	Ssna1-202	chr2:25271706-25272404	-	processed_transcript	70.28	115.461	52.6148	161.473	54.9343	187.236	79.4519	134.548	1.69345	0.759964	0.284397	0.413982
ENSMUST00000183355.7	Dexi	Dexi-202	chr16:10530207-10531809	-	processed_transcript	40.9707	19.0114	54.6495	34.0258	46.1085	105.523	38.2105	61.8857	1.6196	0.695636	0.387061	0.516559
ENSMUST00000164587.1	Anxa1	Anxa1-203	chr19:20379659-20390651	-	processed_transcript	39.0522	1	1	1	151.494	1	13.6841	51.1645	3.73899	1.90265	0.508947	0.621143
ENSMUST00000125830.1	Pygo2	Pygo2-203	chr3:89431032-89432992	+	processed_transcript	23.5548	18.6127	54.8493	63.0341	32.4978	45.0325	32.3389	46.8548	1.44887	0.534924	0.370347	0.503592
ENSMUST00000138517.1	Abhd10	Abhd10-203	chr16:45736974-45742885	-	processed_transcript	14.0553	12.3798	11.6078	23.2462	33.2611	9.97341	12.6809	22.1603	1.74753	0.805313	0.234794	0.360637
ENSMUST00000144013.1	Epb41l1	Epb41l1-211	chr2:156506394-156514158	+	processed_transcript	32.551	110.758	49.7389	93.681	78.7762	92.7382	64.3495	88.3985	1.37373	0.458094	0.376825	0.506117
ENSMUST00000199371.1	P2rx7	P2rx7-208	chr5:122650424-122681373	+	processed_transcript	19.3572	26.4696	10.6719	68.2887	19.2074	15.8239	18.8329	34.44	1.82871	0.87083	0.424268	0.546526
ENSMUST00000155648.1	Hspg2	Hspg2-202	chr4:137569171-137570117	+	processed_transcript	32.2213	34.0579	48.3097	55.1644	83.6927	43.5672	38.1963	60.8081	1.59199	0.67083	0.155995	0.27072
ENSMUST00000142943.1	Slc39a13	Slc39a13-208	chr2:91068431-91068871	-	processed_transcript	17.498	35.7347	8.31905	19.3237	27.5386	37.0851	20.5173	27.9825	1.36385	0.447686	0.478184	0.593957
ENSMUST00000130487.7	Rps17	Rps17-202	chr7:81342732-81344531	-	processed_transcript	232.068	237.868	215.383	359.216	203.96	615.409	228.44	392.861	1.71976	0.782208	0.242989	0.369954
ENSMUST00000162732.1	4930453N24Rik	4930453N24Rik-202	chr16:64751751-64766656	-	processed_transcript	234.761	5.04014	1	29.3544	152.845	1	80.267	61.0663	0.760789	-0.394431	0.841888	0.893685
ENSMUST00000155189.1	Mib2	Mib2-209	chr4:155661320-155669197	-	processed_transcript	18.5713	63.2927	27.6855	31.1657	58.254	67.6917	36.5165	52.3705	1.43416	0.520206	0.416027	0.54061
ENSMUST00000173159.1	Chd1	Chd1-204	chr17:15705018-15731908	+	processed_transcript	3.18919	2.5882	17.5671	278.686	1	1.96107	7.78151	93.8824	12.0648	3.59273	0.404785	0.530103
ENSMUST00000224549.1	Rps24	Rps24-206	chr14:24490785-24491817	+	processed_transcript	39.1538	18.9597	22.8014	9.73305	129.218	50.5154	26.9716	63.1555	2.34155	1.22747	0.367025	0.500968
ENSMUST00000155352.1	Mllt10	Mllt10-211	chr2:18064841-18065255	+	processed_transcript	45.6704	50.4604	64.0786	89.8103	71.2254	86.4186	53.4031	82.4847	1.54457	0.627203	0.0215362	0.0680246
ENSMUST00000123946.1	Igfbp4	Igfbp4-202	chr11:99044766-99051815	+	processed_transcript	33.019	115.888	47.1878	6.27669	477.358	225.435	65.365	236.357	3.61595	1.85438	0.284502	0.414015
ENSMUST00000132239.7	Slc38a10	Slc38a10-209	chr11:120132855-120151320	-	processed_transcript	20.808	30.5576	13.0602	21.3078	32.3261	45.0271	21.4753	32.887	1.53139	0.614842	0.251468	0.379424
ENSMUST00000132591.1	Ndor1	Ndor1-206	chr2:25250175-25255368	-	processed_transcript	36.7335	61.3067	56.4284	61.3138	81.6151	94.6693	51.4895	79.1994	1.53817	0.621211	0.0868682	0.178266
ENSMUST00000190591.7	Nadk2	Nadk2-208	chr15:9071260-9110891	+	processed_transcript	167.951	13.2881	132.723	119.6	119.301	77.0814	104.654	105.327	1.00643	0.00925036	0.989673	0.992628
ENSMUST00000145230.7	Adrm1	Adrm1-203	chr2:180171659-180176286	+	processed_transcript	40.9703	16.4039	70.3134	47.5424	66.1428	55.7642	42.5626	56.4831	1.32706	0.408235	0.44599	0.566682
ENSMUST00000132772.7	Spag9	Spag9-209	chr11:93996091-94043628	+	processed_transcript	77.3877	78.25	23.6193	51.4767	96.1616	105.418	59.7523	84.352	1.41169	0.497428	0.373423	0.506135
ENSMUST00000156902.1	Rai1	Rai1-206	chr11:60140259-60141247	+	processed_transcript	134.023	73.7231	148.209	141.066	228.866	165.347	118.652	178.427	1.50378	0.588597	0.160394	0.275413
ENSMUST00000144130.1	Axin2	Axin2-205	chr11:108938874-108942559	+	processed_transcript	27.9316	52.761	13.3573	113.633	26.6438	23.6667	31.35	54.6478	1.74315	0.801699	0.502728	0.615641
ENSMUST00000155063.7	Stard3	Stard3-207	chr11:98358430-98376830	+	processed_transcript	1	1	28.7194	1	1	104.269	10.2398	35.4229	3.45934	1.7905	0.518819	0.628773
ENSMUST00000136122.7	Fos	Fos-203	chr12:85474691-85476007	+	processed_transcript	44.498	13.9289	50.2863	37.1638	34.4517	88.2579	36.2377	53.2911	1.4706	0.556403	0.458741	0.576487
ENSMUST00000145997.1	Ppp5c	Ppp5c-207	chr7:17022373-17027789	-	processed_transcript	28.6212	21.4457	12.9304	36.2914	24.0352	32.9514	20.9991	31.0927	1.48067	0.566249	0.158246	0.273215
ENSMUST00000129823.1	Grcc10	Grcc10-202	chr6:124739183-124740695	-	processed_transcript	1	35.889	19.1398	33.2372	74.7286	1	18.6762	36.3219	1.94482	0.959637	0.496167	0.609383
ENSMUST00000185996.1	Pcbp4	Pcbp4-207	chr9:106461743-106462411	+	processed_transcript	23.4407	14.9877	43.5882	63.4121	29.5536	29.4548	27.3388	40.8068	1.49263	0.577858	0.394553	0.522544
ENSMUST00000151800.7	2210408F21Rik	2210408F21Rik-211	chr6:31220357-31337392	+	lincRNA	66.4802	42.2336	41.3503	45.0024	96.9203	95.9335	50.0213	79.2854	1.58503	0.664511	0.198702	0.318911
ENSMUST00000123700.1	Mir142hg	Mir142hg-201	chr11:87755577-87757270	+	lincRNA	50.5121	46.9687	41.905	68.2277	60.26	86.6723	46.462	71.72	1.54363	0.626326	0.0370714	0.0974768
ENSMUST00000216325.1	Mrpl4	Mrpl4-205	chr9:21002975-21007477	+	processed_transcript	45.0081	32.2233	19.8522	62.045	48.2353	34.4685	32.3612	48.2496	1.49097	0.576253	0.214365	0.337175
ENSMUST00000132454.1	Zfand2a	Zfand2a-203	chr5:139474920-139478943	-	processed_transcript	14.3383	6.0662	17.0247	23.6117	4.60698	48.6399	12.4764	25.6195	2.05344	1.03804	0.374787	0.50486
ENSMUST00000221454.1	Jag2	Jag2-205	chr12:112910455-112913180	-	processed_transcript	14.8054	27.4293	1	49.0001	1	29.521	14.4116	26.507	1.83929	0.879147	0.488965	0.603924
ENSMUST00000130001.1	Rps6	Rps6-203	chr4:86855862-86857332	-	processed_transcript	15.5156	53.8642	46.9117	64.1887	27.2597	79.7075	38.7638	57.052	1.47178	0.557566	0.401902	0.527425
ENSMUST00000135064.1	Prdm16	Prdm16-209	chr4:154476469-154528765	-	processed_transcript	6.70894	16.0579	23.2383	9.79408	18.1586	49.8656	15.3351	25.9394	1.69151	0.758313	0.463918	0.581687
ENSMUST00000162137.1	Sdha	Sdha-208	chr13:74344878-74350157	-	processed_transcript	123.58	50.6724	72.1761	105.946	98.4975	152.941	82.1428	119.128	1.45026	0.536308	0.250367	0.378443
ENSMUST00000226427.1	Sdr39u1	Sdr39u1-204	chr14:55897836-55900115	-	processed_transcript	12.8581	23.2195	12.0141	52.3946	19.6039	12.253	16.0306	28.0838	1.75189	0.808913	0.4015	0.527446
ENSMUST00000209864.1	Ebf3	Ebf3-206	chr7:137298711-137313916	-	processed_transcript	14.8942	20.8927	25.294	263.178	6.3127	16.5064	20.3603	95.3324	4.68227	2.22721	0.422698	0.545339
ENSMUST00000135084.1	Rabl6	Rabl6-203	chr2:25585189-25585823	-	processed_transcript	78.8683	136.731	95.8465	252.084	163.365	87.2716	103.815	167.574	1.61415	0.690777	0.276358	0.406034
ENSMUST00000131131.1	Ezr	Ezr-202	chr17:6740837-6742821	-	processed_transcript	13.5326	19.7062	37.9246	32.3023	18.8797	57.4755	23.7211	36.2192	1.52687	0.61058	0.406174	0.531646
ENSMUST00000162579.7	1810021B22Rik	1810021B22Rik-205	chr15:89071196-89074297	-	lincRNA	36.6884	60.7515	49.1858	58.5484	53.9026	120.32	48.8752	77.5904	1.58752	0.666775	0.271054	0.401049
ENSMUST00000218692.1	Dyrk2	Dyrk2-203	chr10:118861023-118868299	-	processed_transcript	36.0446	35.7114	33.393	67.671	27.2904	79.9966	35.0497	58.3193	1.66391	0.734573	0.218093	0.340803
ENSMUST00000130804.7	Smyd2	Smyd2-202	chr1:189880494-189889002	-	processed_transcript	133.473	307.426	1189.63	235.948	593.384	1192.85	543.51	674.06	1.2402	0.310571	0.77652	0.844582
ENSMUST00000140597.7	Rpl7	Rpl7-203	chr1:16101295-16102082	-	processed_transcript	12.5252	8.36927	15.1595	41.0081	18.4518	7.14576	12.018	22.2019	1.84739	0.885485	0.372376	0.505669
ENSMUST00000139399.1	Rara	Rara-205	chr11:98938328-98950361	+	processed_transcript	17.548	16.0461	9.53168	32.5915	20.8012	13.4408	14.3753	22.2778	1.54973	0.632021	0.264582	0.393554
ENSMUST00000142288.1	Edf1	Edf1-203	chr2:25560585-25562082	+	processed_transcript	5.73099	30.8624	14.5266	8.09036	25.8128	41.7444	17.04	25.2159	1.47981	0.565408	0.539259	0.647163
ENSMUST00000137814.7	Sdccag3	Sdccag3-210	chr2:26387126-26389267	-	processed_transcript	30.8255	38.2774	17.8014	17.8658	71.1257	55.385	28.9681	48.1255	1.66133	0.732335	0.320124	0.453284
ENSMUST00000134691.1	Trim47	Trim47-205	chr11:116106392-116108035	-	processed_transcript	173.123	39.2865	87.2484	154.446	174.355	73.8034	99.886	134.201	1.34354	0.426044	0.528481	0.637264
ENSMUST00000150739.1	Rps27a	Rps27a-205	chr11:29545899-29547882	-	processed_transcript	307.058	205.828	300.892	290.933	643.618	338.257	271.259	424.269	1.56407	0.645309	0.255087	0.383506
ENSMUST00000131946.7	Fastk	Fastk-206	chr5:24443369-24445197	-	processed_transcript	41.4339	60.1248	57.7775	59.2102	102.499	78.8081	53.1121	80.1726	1.5095	0.594069	0.12196	0.228669
ENSMUST00000201981.1	Letm1	Letm1-206	chr5:33769363-33782714	-	processed_transcript	1	458.382	1	36.0493	42.2489	1	153.461	26.4327	0.172245	-2.53747	0.453079	0.571511
ENSMUST00000132115.7	Dmpk	Dmpk-207	chr7:19088185-19093044	+	processed_transcript	27.274	124.96	24.6856	10.8708	281.735	91.132	58.9733	127.913	2.16899	1.11702	0.471713	0.58824
ENSMUST00000182969.7	Sh3d19	Sh3d19-205	chr3:85971109-86083538	+	processed_transcript	151.3	212.522	133.807	215.237	279.774	235.502	165.876	243.505	1.46799	0.553841	0.0638428	0.143015
ENSMUST00000133099.1	Rangrf	Rangrf-203	chr11:68972498-68973196	-	processed_transcript	10.5888	14.6168	33.5995	19.649	53.7848	16.1687	19.6017	29.8675	1.52372	0.607596	0.50236	0.615488
ENSMUST00000140681.1	Slc9a1	Slc9a1-203	chr4:133370644-133412136	+	processed_transcript	48.305	95.0974	55.9357	105.403	83.4163	95.9189	66.4461	94.9126	1.42842	0.514416	0.146549	0.259149
ENSMUST00000204825.2	Arpc5l	Arpc5l-205	chr2:39008141-39013899	+	processed_transcript	150.429	146.376	92.1728	206.73	261.164	122.586	129.659	196.826	1.51803	0.6022	0.205453	0.32611
ENSMUST00000134931.1	Cldn12	Cldn12-206	chr5:5511094-5514958	-	processed_transcript	18.2039	12.2076	23.8587	16.8048	31.9126	32.1013	18.0901	26.9396	1.48919	0.574529	0.219385	0.342186
ENSMUST00000149605.1	Prdm16	Prdm16-212	chr4:154476500-154636797	-	processed_transcript	33.863	63.5984	14.8094	40.3135	47.0657	54.5018	37.4236	47.2937	1.26374	0.337698	0.540707	0.648128
ENSMUST00000134895.1	Map3k6	Map3k6-204	chr4:133250849-133252928	+	processed_transcript	46.9667	15.2387	31.0398	45.7968	80.1574	19.5812	31.0817	48.5118	1.56078	0.642269	0.428126	0.55051
ENSMUST00000130970.1	Gorasp2	Gorasp2-204	chr2:70662200-70677950	+	processed_transcript	73.5208	39.0924	26.3893	73.1871	61.0855	54.6566	46.3342	62.9764	1.35918	0.442735	0.331999	0.465909
ENSMUST00000190130.1	Nav1	Nav1-206	chr1:135458680-135510451	-	processed_transcript	30.4387	33.7227	33.9853	33.7891	68.7491	48.3639	32.7156	50.3007	1.53752	0.620602	0.159871	0.274891
ENSMUST00000134236.1	Gm13067	Gm13067-201	chr4:150049013-150056976	+	lincRNA	34.0308	68.4388	19.9078	79.1482	38.6315	48.7677	40.7924	55.5158	1.36093	0.444597	0.478723	0.594188
ENSMUST00000128724.7	Iqsec2	Iqsec2-204	chrX:152178964-152194601	+	processed_transcript	73.4713	52.7446	13.6516	27.4314	72.9665	84.9821	46.6225	61.7934	1.3254	0.406425	0.573704	0.679116
ENSMUST00000137993.1	Ccdc9	Ccdc9-206	chr7:16280626-16281806	-	processed_transcript	13.4378	69.8528	15.7007	34.7633	24.5188	55.5437	32.9971	38.2753	1.15996	0.214075	0.810187	0.869376
ENSMUST00000135707.7	Aldoa	Aldoa-205	chr7:126795912-126798282	-	processed_transcript	161.764	240.923	201.088	347.707	324.636	222.95	201.258	298.431	1.48282	0.568348	0.0949774	0.190106
ENSMUST00000151577.1	Mafk	Mafk-203	chr5:139791534-139799500	+	processed_transcript	22.4433	28.7618	11.164	8.85786	52.4069	49.7276	20.7897	36.9975	1.77961	0.831558	0.340753	0.473316
ENSMUST00000186844.1	Gm28592	Gm28592-201	chr10:111506575-111507662	-	lincRNA	20.8586	10.9207	9.84673	14.8566	46.847	10.247	13.8753	23.9835	1.7285	0.78952	0.448092	0.567636
ENSMUST00000152690.1	Tgm2	Tgm2-203	chr2:158134322-158139736	-	processed_transcript	32.576	43.0639	41.7672	55.584	55.4347	60.3058	39.1357	57.1082	1.45924	0.545212	0.00804646	0.0367526
ENSMUST00000143847.7	Meg3	Meg3-208	chr12:109546445-109571722	+	lincRNA	18.6727	154.079	91.9685	84.8857	70.7915	139.627	88.24	98.4346	1.11553	0.157733	0.829691	0.88559
ENSMUST00000132812.1	Trp53bp1	Trp53bp1-210	chr2:121205081-121208574	-	processed_transcript	26.1776	33.2772	30.7605	30.7153	79.8106	34.3738	30.0718	48.2999	1.60615	0.683609	0.316252	0.449444
ENSMUST00000219100.1	Myl6	Myl6-210	chr10:128492228-128494145	-	processed_transcript	115.35	148.091	161.218	275.131	195.894	160.619	141.553	210.548	1.48741	0.572804	0.131732	0.241069
ENSMUST00000155857.1	Pdk2	Pdk2-205	chr11:95031914-95040875	-	processed_transcript	30.481	17.5603	34.6136	43.6907	35.3066	37.5565	27.5516	38.8512	1.41012	0.495822	0.119166	0.225023
ENSMUST00000189987.1	Sobp	Sobp-202	chr10:43172974-43174521	-	processed_transcript	11.7484	15.603	25.898	33.9135	20.2632	21.4797	17.7498	25.2188	1.42079	0.506697	0.286011	0.415731
ENSMUST00000189221.1	Gm29246	Gm29246-201	chr10:43173263-43173958	+	antisense_RNA	113.951	99.4386	100.818	144.987	130.51	187.629	104.736	154.375	1.47395	0.559684	0.0490375	0.118946
ENSMUST00000145437.1	2810410L24Rik	2810410L24Rik-201	chr11:120187707-120189852	-	processed_transcript	74.0721	67.5371	57.0807	128.713	108.443	63.5629	66.23	100.24	1.51351	0.597897	0.16222	0.277509
ENSMUST00000124445.2	Ptp4a1	Ptp4a1-203	chr1:30946167-30949309	-	processed_transcript	94.4717	142.934	106.644	135.523	157.144	208.843	114.683	167.17	1.45767	0.543662	0.115398	0.219553
ENSMUST00000123661.7	Rasgrp2	Rasgrp2-210	chr19:6399917-6402446	+	processed_transcript	70.9906	171.454	70.2073	155.553	111.662	151.292	104.217	139.502	1.33857	0.420692	0.387349	0.516808
ENSMUST00000225093.1	AC175538.2	AC175538.2-204	chr13:115090054-115101720	-	processed_transcript	37.5538	71.0903	52.0384	71.213	95.7582	62.5557	53.5608	76.5089	1.42845	0.51445	0.174071	0.2901
ENSMUST00000185095.2	Gm27184	Gm27184-201	chr1:119520090-119526359	-	antisense_RNA	10.1103	14.5694	14.6181	18.9995	41.2391	8.35168	13.0993	22.8634	1.7454	0.803556	0.375604	0.505016
ENSMUST00000185375.2	Ep300	Ep300-202	chr15:81585351-81588347	+	processed_transcript	69.3631	66.2683	62.3317	167.215	52.2823	99.3479	65.9877	106.282	1.61063	0.687626	0.294391	0.425701
ENSMUST00000196851.1	Gm43566	Gm43566-201	chr5:23674739-23675546	-	sense_intronic	14.3006	36.6287	10.4538	15.7548	24.3376	43.2758	20.461	27.7894	1.35816	0.441655	0.559215	0.66572
ENSMUST00000141626.1	Tbc1d14	Tbc1d14-212	chr5:36524941-36530507	-	processed_transcript	13.1693	13.1993	19.9434	18.7026	30.5105	18.3713	15.4373	22.5281	1.45933	0.545302	0.19682	0.317001
ENSMUST00000129607.1	Ece1	Ece1-202	chr4:137913682-137926052	+	processed_transcript	117.055	144.867	87.5009	212.993	160.846	130.565	116.474	168.135	1.44354	0.529612	0.151791	0.265714
ENSMUST00000136269.7	Rpl7a	Rpl7a-203	chr2:26910817-26913057	+	processed_transcript	742.476	1471.8	506.943	837.671	1357.36	1460.34	907.073	1218.46	1.34329	0.425766	0.422146	0.545047
ENSMUST00000139932.7	Mapk7	Mapk7-211	chr11:61491606-61494188	-	processed_transcript	1	21.8526	11.0897	50.8871	14.2691	1	11.3141	22.0521	1.94908	0.962794	0.540988	0.648157
ENSMUST00000228259.1	H19	H19-206	chr7:142576982-142577933	-	lincRNA	20.3752	14.1838	11.4382	30.5946	17.5937	18.3721	15.3324	22.1868	1.44705	0.533118	0.240006	0.366742
ENSMUST00000132222.1	Speg	Speg-209	chr1:75385512-75389104	+	processed_transcript	18.2569	22.0563	136.036	91.9021	41.7658	42.6123	58.783	58.7601	0.999609	-0.000563595	0.99959	0.99959
ENSMUST00000151006.1	Gpr63	Gpr63-202	chr4:24966407-25007300	+	processed_transcript	16.2304	1	18.839	1	18.5596	49.0821	12.0231	22.8806	1.90305	0.928312	0.51211	0.623794
ENSMUST00000185854.1	Pcbp4	Pcbp4-205	chr9:106453407-106460075	+	processed_transcript	38.7945	23.334	48.0416	52.7603	29.883	81.7006	36.7234	54.7813	1.49173	0.576984	0.338727	0.471802
ENSMUST00000130204.1	Rarg	Rarg-204	chr15:102241939-102243589	-	processed_transcript	48.3889	35.3349	27.3937	44.8417	53.0562	58.0002	37.0392	51.966	1.403	0.488517	0.10768	0.208331
ENSMUST00000211997.1	Gse1	Gse1-207	chr8:120562623-120563834	+	processed_transcript	43.9697	8.25775	8.74961	33.7717	16.6923	16.5985	20.3257	22.3541	1.0998	0.137238	0.884696	0.921841
ENSMUST00000191150.1	2310035C23Rik	2310035C23Rik-211	chr1:105663937-105665150	+	processed_transcript	69.1827	3.93167	35.0243	98.7566	1	283.868	36.0462	127.875	3.54752	1.82681	0.341072	0.473367
ENSMUST00000132941.1	Notch1	Notch1-207	chr2:26462218-26462747	-	processed_transcript	26.1693	16.4582	31.4711	21.8416	36.81	49.5184	24.6995	36.0567	1.45981	0.545783	0.281294	0.411248
ENSMUST00000135774.1	Smyd4	Smyd4-202	chr11:75399609-75400633	+	processed_transcript	30.0862	26.1212	16.0341	35.3237	46.5756	22.4692	24.0805	34.7895	1.44472	0.530787	0.257841	0.385919
ENSMUST00000189675.1	Gm28529	Gm28529-202	chr18:6490155-6491124	+	antisense_RNA	124.787	87.4147	91.1887	153.027	104.391	182.306	101.13	146.575	1.44937	0.535423	0.151013	0.264719
ENSMUST00000217817.1	AC117232.3	AC117232.3-201	chr10:128651259-128669315	-	lincRNA	1	18.6614	21.429	62.7934	18.5974	1	13.6968	27.4636	2.00511	1.00368	0.518386	0.628551
ENSMUST00000218411.1	CT030161.1	CT030161.1-201	chr12:80391614-80391737	-	sense_intronic	77.2751	18.7583	11.6039	33.8603	46.0462	31.4834	35.8791	37.1299	1.03486	0.0494389	0.955956	0.96923
ENSMUST00000156715.1	Nsmaf	Nsmaf-211	chr4:6396769-6454096	-	processed_transcript	1	25.9852	18.2728	38.2243	36.1586	1	15.086	25.1276	1.66563	0.736064	0.517322	0.628017
ENSMUST00000126026.1	Stoml2	Stoml2-204	chr4:43030493-43031436	-	processed_transcript	43.0991	42.2236	30.3225	138.956	42.2311	27.2973	38.5484	69.4949	1.8028	0.850238	0.429427	0.55162
ENSMUST00000163602.8	Plpp2	Plpp2-202	chr10:79526430-79533792	-	processed_transcript	1	2.35712	33.4861	2.60945	87.7136	1	12.2811	30.441	2.47869	1.30958	0.58412	0.688212
ENSMUST00000141930.1	Gm15816	Gm15816-201	chr8:23138794-23149585	-	antisense_RNA	59.677	54.8118	67.2662	84.0202	99.8982	75.9548	60.585	86.6244	1.4298	0.515813	0.0301849	0.0850988
ENSMUST00000172581.1	Jarid2	Jarid2-202	chr13:44734040-44874314	+	processed_transcript	39.1827	110.917	91.7171	141.815	65.0877	125.041	80.6057	110.648	1.37271	0.457023	0.396341	0.523262
ENSMUST00000131465.1	Mest	Mest-204	chr6:30738055-30738878	+	processed_transcript	31.2014	29.1454	13.0947	31.0468	35.18	31.5225	24.4805	32.5831	1.33098	0.412493	0.239654	0.366427
ENSMUST00000209202.1	Gm34030	Gm34030-201	chr8:57331692-57334585	-	lincRNA	255.983	63.2086	268.378	392.399	128.559	248.268	195.856	256.409	1.30917	0.38865	0.581626	0.686077
ENSMUST00000144319.7	Ptgs1	Ptgs1-203	chr2:36230556-36238063	+	processed_transcript	38.6841	43.6406	40.4233	80.7281	19.6244	124.074	40.916	74.8088	1.82835	0.870543	0.326402	0.460363
ENSMUST00000138898.1	Pkn1	Pkn1-207	chr8:83670587-83671780	-	processed_transcript	141.758	68.4663	104.256	129.323	112.737	199.708	104.827	147.256	1.40475	0.490318	0.280563	0.410655
ENSMUST00000190694.1	Plekha6	Plekha6-209	chr1:133269456-133272334	+	processed_transcript	37.4435	210.865	40.1109	124.373	81.0782	90.0803	96.1397	98.5104	1.02466	0.0351436	0.969805	0.978154
ENSMUST00000154572.1	Pml	Pml-212	chr9:58220263-58230127	-	processed_transcript	25.1255	13.5865	21.4265	21.0494	31.8562	31.2026	20.0462	28.036	1.39857	0.483954	0.176893	0.293154
ENSMUST00000130148.1	Clec16a	Clec16a-208	chr16:10545377-10563445	+	processed_transcript	30.3202	24.8832	93.9974	35.517	320.865	17.7951	49.7336	124.726	2.50787	1.32647	0.497735	0.611011
ENSMUST00000189386.1	2310040G24Rik	2310040G24Rik-202	chr6:86483376-86488227	-	lincRNA	145.719	140.344	123.56	137.092	289.19	182.255	136.541	202.846	1.4856	0.571049	0.219517	0.34218
ENSMUST00000123745.1	Sh3bp4	Sh3bp4-202	chr1:89070453-89112860	+	processed_transcript	28.1201	15.5371	33.0437	21.4227	80.0331	24.0304	25.567	41.8287	1.63605	0.710213	0.457918	0.575741
ENSMUST00000191791.1	Lsmem2	Lsmem2-201	chr9:107593841-107597075	-	lincRNA	1016.86	714.136	616.696	1006.51	1301.06	972.712	782.564	1093.43	1.39724	0.482577	0.122814	0.229162
ENSMUST00000128458.2	Meg3	Meg3-204	chr12:109549157-109558803	+	lincRNA	50.2461	69.1601	74.1562	90.101	59.8202	135.847	64.5208	95.2559	1.47636	0.562045	0.257003	0.385123
ENSMUST00000197520.1	Cox19	Cox19-206	chr5:139337822-139345177	-	processed_transcript	13.8472	21.6166	11.7154	14.0746	46.8448	15.0456	15.7264	25.3217	1.61013	0.687181	0.439055	0.560699
ENSMUST00000128926.7	Dhrs3	Dhrs3-203	chr4:144893131-144919972	+	processed_transcript	25.495	24.1841	45.7231	36.6385	41.7881	51.9572	31.8007	43.4613	1.36668	0.45067	0.232659	0.358122
ENSMUST00000144353.1	Irak1	Irak1-216	chrX:74022746-74023508	-	processed_transcript	22.1384	25.016	21.004	25.9568	60.4544	20.8317	22.7195	35.7476	1.57343	0.653917	0.356102	0.490309
ENSMUST00000224453.1	Dcp1a	Dcp1a-205	chr14:30479535-30510494	+	processed_transcript	15.8131	21.9994	13.9308	20.9712	31.2106	20.7412	17.2478	24.3077	1.40932	0.495001	0.170104	0.28652
ENSMUST00000176840.7	Fggy	Fggy-217	chr4:95586915-95738865	+	processed_transcript	6.66974	1	6.00508	71.5408	1	1.56788	4.55827	24.7029	5.41935	2.43812	0.439428	0.560891
ENSMUST00000152972.1	Spg7	Spg7-210	chr8:123087408-123091716	+	processed_transcript	25.6453	26.0108	29.2969	35.0891	39.3987	39.5511	26.9843	38.013	1.40871	0.49437	0.00411429	0.0255268
ENSMUST00000126894.7	Msrb2	Msrb2-202	chr2:19371668-19393320	+	processed_transcript	21.6667	17.371	13.0716	35.9117	22.8963	16.7303	17.3698	25.1794	1.44961	0.535665	0.274582	0.404251
ENSMUST00000209597.1	1700012D14Rik	1700012D14Rik-201	chr7:111083064-111122537	-	lincRNA	40.1201	34.337	38.1941	31.0898	65.9119	71.6611	37.5504	56.2209	1.49721	0.58228	0.218074	0.340881
ENSMUST00000151085.1	Rnf10	Rnf10-207	chr5:115251314-115260226	-	processed_transcript	55.9541	35.519	35.3583	55.6198	77.6594	45.2655	42.2771	59.5149	1.40773	0.493373	0.216186	0.338876
ENSMUST00000129914.1	Cdk16	Cdk16-205	chrX:20696445-20699799	+	processed_transcript	34.2044	23.0628	38.4739	19.5084	45.0396	95.7857	31.9137	53.4445	1.67466	0.743867	0.400019	0.526599
ENSMUST00000154900.7	Map4k2	Map4k2-220	chr19:6346669-6351659	+	processed_transcript	71.2137	61.7378	69.1673	126.433	96.6491	68.9534	67.3729	97.3452	1.44487	0.530941	0.149797	0.263045
ENSMUST00000125848.1	Dnlz	Dnlz-202	chr2:26348121-26352100	-	processed_transcript	515.617	504.994	470.513	779.176	672.184	644.454	497.041	698.605	1.40553	0.491111	0.00960261	0.0410331
ENSMUST00000195990.1	Gm42984	Gm42984-201	chr5:44226587-44243548	+	antisense_RNA	39.2213	66.728	46.764	59.8568	93.4352	60.2197	50.9044	71.1706	1.39812	0.48349	0.216695	0.339357
ENSMUST00000148452.1	Tmem45a	Tmem45a-203	chr16:56806490-56810071	-	processed_transcript	12.371	5.89032	4.23383	1	68.3437	12.4144	7.4984	27.2527	3.63447	1.86174	0.399224	0.526103
ENSMUST00000134906.1	Egln2	Egln2-203	chr7:27165533-27166282	-	processed_transcript	62.114	30.6467	87.5576	51.6685	94.6576	93.6013	60.1061	79.9758	1.33058	0.412053	0.411854	0.536572
ENSMUST00000142191.1	Tiprl	Tiprl-202	chr1:165222445-165236922	-	processed_transcript	78.6046	46.293	11.3347	48.7215	43.7168	53.143	45.4108	48.5271	1.06863	0.0957561	0.881461	0.919992
ENSMUST00000161143.7	Timm44	Timm44-209	chr8:4267344-4275882	-	processed_transcript	70.6703	47.695	45.1397	72.5435	85.0724	67.5767	54.5017	75.0642	1.37728	0.461824	0.0999531	0.197167
ENSMUST00000131101.2	Sh2d3c	Sh2d3c-204	chr2:32741490-32747064	+	processed_transcript	49.3971	30.5861	39.4631	50.5178	68.1355	47.3591	39.8154	55.3375	1.38985	0.474929	0.139878	0.250874
ENSMUST00000098065.3	Akap2	Akap2-203	chr4:57717657-57856922	+	processed_transcript	37.85	37.6661	61.04	184.635	80.132	16.0663	45.5187	93.611	2.05654	1.04022	0.388318	0.517005
ENSMUST00000139099.7	Ccdc157	Ccdc157-206	chr11:4148814-4160218	-	processed_transcript	23.4011	9.77634	10.7652	34.7419	7.93297	24.3807	14.6476	22.3518	1.52598	0.609732	0.438032	0.559819
ENSMUST00000124965.1	Acbd4	Acbd4-204	chr11:103106204-103112197	+	processed_transcript	22.0523	19.5161	1	24.6089	1	47.3937	14.1895	24.3342	1.71495	0.778166	0.534555	0.643049
ENSMUST00000195277.1	Gm7292	Gm7292-202	chr6:117716473-117717467	+	lincRNA	1466.03	1771.3	1440.3	2229.15	2304.4	1969.35	1559.21	2167.63	1.39021	0.475306	0.0143813	0.0530402
ENSMUST00000134689.7	Edf1	Edf1-202	chr2:25557897-25561264	+	processed_transcript	1118.47	1217.61	392.943	931.556	1153.25	1342.15	909.673	1142.32	1.25574	0.328543	0.46124	0.578762
ENSMUST00000143299.1	Rsad1	Rsad1-203	chr11:94544570-94548792	-	processed_transcript	53.6399	23.9477	29.2647	102.58	39.6465	24.8288	35.6174	55.6852	1.56343	0.644711	0.475747	0.592244
ENSMUST00000221846.1	Mccc2	Mccc2-204	chr13:100002292-100015618	-	processed_transcript	46.2976	66.017	45.2107	64.1575	69.9117	82.7263	52.5084	72.2652	1.37626	0.460751	0.085852	0.176901
ENSMUST00000124605.1	Tbc1d9b	Tbc1d9b-203	chr11:50148132-50149965	+	processed_transcript	10.3836	32.1649	14.7834	15.8065	31.0061	26.9626	19.1106	24.5918	1.28681	0.363799	0.533535	0.642128
ENSMUST00000186474.2	2410022M11Rik	2410022M11Rik-201	chr14:56811989-56813899	+	bidirectional_promoter_lncRNA	142.262	161.738	132.375	215.463	170.706	221.627	145.458	202.599	1.39283	0.478018	0.0349593	0.0935343
ENSMUST00000160227.7	AI480526	AI480526-204	chr5:123134292-123139347	-	lincRNA	97.0732	134.142	69.9027	128.244	117.107	162.18	100.373	135.844	1.3534	0.436583	0.198339	0.318633
ENSMUST00000210375.1	Ftl1	Ftl1-203	chr7:45457945-45459421	-	processed_transcript	33.4835	1	38.1504	47.3774	71.9401	1	24.2113	40.1058	1.65649	0.728132	0.541695	0.648695
ENSMUST00000164956.7	Nisch	Nisch-206	chr14:31177501-31192619	-	processed_transcript	31.8482	30.0614	27.4875	39.4001	27.8098	64.0516	29.799	43.7538	1.4683	0.554145	0.264445	0.393465
ENSMUST00000123903.1	Jup	Jup-203	chr11:100383404-100386770	-	processed_transcript	40.6693	34.0902	61.1174	48.317	43.3964	107.685	45.2923	66.4661	1.46749	0.553352	0.39427	0.522307
ENSMUST00000128558.1	Sgcd	Sgcd-203	chr11:47578805-47988969	-	processed_transcript	35.8658	56.659	20.664	45.4448	42.4835	57.9502	37.7296	48.6262	1.28881	0.366036	0.395485	0.523091
ENSMUST00000138160.7	Bnip3l	Bnip3l-205	chr14:66987273-66989841	-	processed_transcript	26.2539	1.70283	1.69881	1	201.795	1	9.88518	67.9318	6.87209	2.78075	0.437868	0.559894
ENSMUST00000187147.1	Gm29015	Gm29015-201	chr14:54973029-54973359	+	antisense_RNA	350.538	477.181	375.225	511.269	634.642	513.721	400.982	553.211	1.37964	0.464294	0.0536615	0.126448
ENSMUST00000128707.7	Smarce1	Smarce1-203	chr11:99219709-99230413	-	processed_transcript	27.7306	13.3769	10.9732	27.9875	17.5346	21.9332	17.3602	22.4851	1.29521	0.373185	0.444345	0.565306
ENSMUST00000137348.7	Mier1	Mier1-210	chr4:103114431-103131021	+	processed_transcript	15.734	31.3294	15.4983	50.249	48.1957	8.28708	20.8539	35.5773	1.70603	0.77064	0.371111	0.504222
ENSMUST00000144931.1	Plcb4	Plcb4-210	chr2:135659011-135742751	+	processed_transcript	45.4785	83.9842	57.1989	83.0725	64.3088	107.187	62.2205	84.8561	1.3638	0.447627	0.250269	0.378408
ENSMUST00000127677.7	Eif4a1	Eif4a1-203	chr11:69670180-69671730	-	processed_transcript	83.8549	138.779	59.7347	155.705	104.462	111.9	94.1227	124.022	1.31767	0.397985	0.350765	0.483886
ENSMUST00000155989.1	Cask	Cask-211	chrX:13846090-13846735	-	processed_transcript	41.4473	3.08815	58.9109	1	96.1209	204.78	34.4821	100.634	2.91843	1.54519	0.340097	0.472534
ENSMUST00000176842.7	Uba7	Uba7-209	chr9:107975606-107976150	+	processed_transcript	30.4191	42.8482	33.8254	32.1426	54.8426	65.0812	35.6976	50.6888	1.41995	0.505842	0.223456	0.347245
ENSMUST00000224839.1	Acot13	Acot13-202	chr13:24820814-24831540	-	processed_transcript	13.2402	38.5048	29.6224	29.6122	27.5683	47.9347	27.1224	35.0384	1.29186	0.36945	0.465909	0.583457
ENSMUST00000127634.7	Ogfod1	Ogfod1-204	chr8:94037263-94057779	+	processed_transcript	52.0441	167.842	60.1598	82.3746	135.69	121.434	93.3486	113.166	1.2123	0.277743	0.650862	0.746424
ENSMUST00000138401.1	Dek	Dek-204	chr13:47084775-47098438	-	processed_transcript	29.0334	180.455	48.7067	48.9506	131.656	101.982	86.065	94.1961	1.09448	0.13024	0.886214	0.922659
ENSMUST00000220406.1	Lsm7	Lsm7-209	chr10:80852833-80855143	-	processed_transcript	1	40.6401	1	104.631	1	1	14.2134	35.5435	2.50071	1.32234	0.595021	0.696981
ENSMUST00000144323.2	Smad6	Smad6-202	chr9:63954009-64016987	-	processed_transcript	24.4048	23.5537	12.5012	24.8485	17.1103	43.4297	20.1532	28.4628	1.41232	0.498068	0.393603	0.521697
ENSMUST00000153063.7	Sumf2	Sumf2-203	chr5:129852511-129862798	+	processed_transcript	19.0973	65.348	10.7144	40.8227	37.8786	22.2184	31.7199	33.6399	1.06053	0.0847859	0.91993	0.944297
ENSMUST00000199237.4	Mad1l1	Mad1l1-206	chr5:140008694-140174918	-	processed_transcript	1	119.23	8.99557	11.3065	4.54475	53.175	43.0751	23.0088	0.534155	-0.904671	0.650688	0.746395
ENSMUST00000147843.7	Dda1	Dda1-210	chr8:71469199-71472246	+	processed_transcript	12.2418	21.9675	25.7895	38.2026	15.2474	30.2925	19.9996	27.9142	1.39574	0.481026	0.370268	0.50362
ENSMUST00000150565.1	Rpl11	Rpl11-208	chr4:136051028-136052716	-	processed_transcript	85.2239	84.8424	83.2066	83.0327	123.071	149.531	84.4243	118.545	1.40416	0.489704	0.152447	0.266399
ENSMUST00000156824.1	Npdc1	Npdc1-214	chr2:25403448-25408003	+	processed_transcript	26.2533	109.867	82.0558	25.0811	67.9535	351.823	72.7253	148.286	2.03899	1.02785	0.513165	0.624625
ENSMUST00000142292.7	Junos	Junos-207	chr4:95051534-95067422	+	antisense_RNA	32.3216	19.0002	28.3146	35.3553	35.6204	34.7773	26.5455	35.251	1.32795	0.409199	0.0924659	0.186561
ENSMUST00000223430.1	AC164441.1	AC164441.1-202	chr13:54302558-54312175	+	lincRNA	47.777	13.5692	53.2877	32.5716	46.1884	57.7647	38.2113	45.5082	1.19096	0.252126	0.638991	0.735994
ENSMUST00000152269.7	Psmc3	Psmc3-209	chr2:91054095-91055935	+	processed_transcript	17.8832	38.1859	38.1697	24.4408	67.8944	39.186	31.413	43.8404	1.39561	0.480901	0.43799	0.559907
ENSMUST00000137734.7	Nr2f6	Nr2f6-206	chr8:71374628-71375790	-	processed_transcript	43.678	6.23278	26.8845	3.44494	55.5913	95.2997	25.5984	51.4453	2.0097	1.00698	0.418979	0.542766
ENSMUST00000183029.7	Myo18b	Myo18b-203	chr5:112772886-112871586	-	processed_transcript	334.092	233.179	360.447	686.323	397.232	256.349	309.239	446.635	1.4443	0.530372	0.357897	0.491572
ENSMUST00000180547.1	9530082P21Rik	9530082P21Rik-201	chr17:23749337-23751207	+	antisense_RNA	75.2745	30.8664	42.4854	59.8501	58.4135	70.08	49.5421	62.7812	1.26723	0.341678	0.391525	0.519627
ENSMUST00000217056.1	Cmtm7	Cmtm7-205	chr9:114763292-114775451	-	processed_transcript	10.0264	14.6183	31.3738	20.6468	11.8648	46.5474	18.6728	26.353	1.4113	0.497027	0.565197	0.671254
ENSMUST00000142587.1	Etfa	Etfa-203	chr9:55488826-55511808	-	processed_transcript	173.79	225.933	219.513	239.801	269.954	329.099	206.412	279.618	1.35466	0.43793	0.0771569	0.163464
ENSMUST00000183174.1	Bgn	Bgn-208	chrX:73494892-73495926	+	processed_transcript	107.034	207.532	215.337	133.573	266.393	331.942	176.634	243.969	1.38121	0.465936	0.377979	0.506992
ENSMUST00000124614.1	Mrps15	Mrps15-202	chr4:126047234-126050483	+	processed_transcript	31.2401	36.3422	25.7471	36.7646	41.8372	46.7601	31.1098	41.7873	1.34322	0.425694	0.0640509	0.14329
ENSMUST00000147059.7	Rpl11	Rpl11-207	chr4:136050332-136052754	-	processed_transcript	20.1467	28.1104	23.3104	28.3264	38.8731	29.4937	23.8559	32.2311	1.35108	0.434108	0.108243	0.209019
ENSMUST00000165664.1	Cish	Cish-202	chr9:107296907-107301943	+	processed_transcript	164.364	124.17	113.635	112.741	93.9317	538.294	134.056	248.322	1.85237	0.889375	0.477319	0.593614
ENSMUST00000028291.14	Inpp5e	Inpp5e-201	chr2:26397054-26409184	-	processed_transcript	11.8749	144.562	32.3378	85.608	19.0746	82.7829	62.9248	62.4885	0.993067	-0.010037	0.992981	0.99456
ENSMUST00000207382.1	Gm44698	Gm44698-201	chr7:19333129-19337655	+	lincRNA	30.4059	25.8383	37.5349	23.299	57.3059	53.6223	31.2597	44.7424	1.43131	0.517339	0.298705	0.429964
ENSMUST00000150249.7	Tprkb	Tprkb-207	chr6:85915756-85924616	+	processed_transcript	32.0408	5.84848	37.2284	18.9323	48.6797	18.3584	25.0392	28.6568	1.14447	0.194686	0.808171	0.868323
ENSMUST00000145836.1	Tmem53	Tmem53-205	chr4:117265371-117268582	+	processed_transcript	23.1502	57.7985	18.7107	24.5378	37.183	66.4425	33.2198	42.7211	1.28601	0.362905	0.616249	0.717344
ENSMUST00000141683.1	Uqcr11	Uqcr11-203	chr10:80402998-80406795	-	processed_transcript	402.28	337.218	277.861	421.743	485.224	443.623	339.12	450.197	1.32754	0.40876	0.0516442	0.123603
ENSMUST00000218814.1	Cabin1	Cabin1-208	chr10:75657287-75667832	-	processed_transcript	48.6726	51.5038	49.6631	63.9447	81.5895	56.9674	49.9465	67.5005	1.35146	0.434516	0.0759338	0.16162
ENSMUST00000129710.7	Slc38a10	Slc38a10-208	chr11:120105805-120110458	-	processed_transcript	36.3469	39.69	33.7384	27.7428	158.527	26.323	36.5917	70.8644	1.93662	0.953542	0.478293	0.593946
ENSMUST00000123474.1	Gramd4	Gramd4-203	chr15:86067813-86122261	+	processed_transcript	32.7362	12.3783	6.35715	12.2345	6.7976	73.6671	17.1572	30.8997	1.80098	0.848779	0.580432	0.684989
ENSMUST00000206566.1	Gm38534	Gm38534-201	chr11:88253368-88256990	+	lincRNA	20.7845	13.3971	28.3466	23.8699	28.4885	27.5934	20.8427	26.6506	1.27865	0.354623	0.270103	0.399993
ENSMUST00000148978.7	Fkbp1a	Fkbp1a-210	chr2:151542737-151560653	+	processed_transcript	51.2432	60.7738	48.4163	49.3861	71.9155	100.86	53.4778	74.054	1.38476	0.469639	0.25141	0.37945
ENSMUST00000148640.7	Gnas	Gnas-218	chr2:174328023-174345279	+	processed_transcript	24.4759	46.1325	26.1319	40.3697	45.5394	38.0517	32.2468	41.3203	1.28138	0.357694	0.281925	0.411692
ENSMUST00000151172.7	Ntpcr	Ntpcr-207	chr8:125730032-125738136	+	processed_transcript	30.2086	48.4822	14.8728	23.4041	55.7637	39.4421	31.1879	39.5366	1.26769	0.342203	0.56915	0.675153
ENSMUST00000188614.1	B3galt1	B3galt1-204	chr2:67565871-67810894	+	processed_transcript	23.0058	65.2946	28.9567	35.9406	65.0159	43.9768	39.0857	48.3111	1.23603	0.305714	0.590768	0.694098
ENSMUST00000143813.1	0610009L18Rik	0610009L18Rik-201	chr11:120348678-120351190	+	bidirectional_promoter_lncRNA	486.742	394.707	398.151	570.942	596.341	530.3	426.534	565.861	1.32665	0.407789	0.0175613	0.0598202
ENSMUST00000151476.1	Jup	Jup-207	chr11:100371059-100374125	-	processed_transcript	12.6166	17.9474	19.1407	18.7861	37.6069	14.4098	16.5682	23.6009	1.42447	0.510423	0.395352	0.523053
ENSMUST00000201775.1	Gm20186	Gm20186-201	chr6:18845910-18846763	-	lincRNA	321.499	141.644	214.114	218.428	313.936	332.84	225.752	288.401	1.27751	0.353339	0.377073	0.506314
ENSMUST00000185516.1	Gm28177	Gm28177-201	chr1:52077261-52156087	+	processed_transcript	22.7916	8.52025	18.5029	28.0134	9.24006	32.3455	16.6049	23.1997	1.39716	0.482493	0.469138	0.586481
ENSMUST00000228355.1	AC131586.3	AC131586.3-201	chr14:46883698-46885064	-	antisense_RNA	15.7867	26.2004	24.7929	36.2465	32.1183	20.3441	22.26	29.5696	1.32838	0.409664	0.274236	0.403859
ENSMUST00000129922.1	Triobp	Triobp-205	chr15:79002182-79004697	+	processed_transcript	45.7033	16.4079	19.0939	42.1799	30.1837	25.8086	27.0684	32.7241	1.20894	0.273744	0.620417	0.721195
ENSMUST00000132934.1	Cavin1	Cavin1-202	chr11:100964407-100970551	-	processed_transcript	201.526	194.585	182.059	287.014	315.102	180.363	192.723	260.826	1.35337	0.436558	0.175594	0.291961
ENSMUST00000145405.1	Tmem201	Tmem201-206	chr4:149731164-149737770	-	processed_transcript	46.2647	33.6966	36.0556	38.2454	58.7473	57.1213	38.6723	51.3713	1.32838	0.409663	0.171231	0.287459
ENSMUST00000177776.1	Gm21992	Gm21992-202	chr19:4792635-4802002	-	processed_transcript	14.1667	18.8828	14.3259	28.9926	35.6544	8.46356	15.7918	24.3702	1.54322	0.62594	0.361152	0.495097
ENSMUST00000123730.1	Dlgap4	Dlgap4-207	chr2:156759945-156762779	+	processed_transcript	17.4917	10.558	25.8017	13.1154	29.5075	28.0723	17.9505	23.5651	1.31278	0.392626	0.458292	0.576066
ENSMUST00000151965.1	Rpl23	Rpl23-205	chr11:97781362-97782362	-	processed_transcript	123.192	199.923	103.117	300.991	251.421	76.2696	142.077	209.56	1.47497	0.56069	0.414963	0.539506
ENSMUST00000131285.1	Wdsub1	Wdsub1-205	chr2:59878332-59882591	-	processed_transcript	92.1725	57.5056	47.7306	76.906	130.831	56.8547	65.8029	88.1974	1.34033	0.422585	0.435658	0.557492
ENSMUST00000156075.1	Cep131	Cep131-206	chr11:120064639-120068057	-	processed_transcript	30.1904	6.88587	16.1854	78.68	29.4366	3.28341	17.7539	37.1333	2.09156	1.06458	0.449026	0.568248
ENSMUST00000180630.1	Gm26532	Gm26532-201	chr8:84208920-84209609	+	lincRNA	459.85	27.2552	504	165.189	225.732	382.688	330.368	257.869	0.780552	-0.357434	0.683651	0.771903
ENSMUST00000131839.7	Dctn6	Dctn6-205	chr8:34090578-34107814	-	processed_transcript	50.924	59.998	72.8267	99.8431	60.313	83.0921	61.2496	81.0827	1.32381	0.404695	0.20458	0.325544
ENSMUST00000154661.7	Atp5o	Atp5o-205	chr16:91926859-91931418	-	processed_transcript	90.6806	187.659	99.2001	146.45	156.757	163.843	125.847	155.683	1.23709	0.306949	0.395978	0.523331
ENSMUST00000127360.1	Secisbp2	Secisbp2-203	chr13:51651797-51657029	+	processed_transcript	30.7231	23.2982	27.6091	27.6259	30.5906	51.9962	27.2102	36.7376	1.35014	0.433111	0.298122	0.429371
ENSMUST00000149601.7	Hectd2os	Hectd2os-207	chr19:36614052-36705641	-	processed_transcript	50.2315	62.1184	27.8327	40.886	88.0511	53.5998	46.7275	60.8456	1.30214	0.38088	0.460435	0.57804
ENSMUST00000138978.7	2410002F23Rik	2410002F23Rik-209	chr7:44246800-44250055	+	processed_transcript	19.6971	22.3105	14.2554	29.1066	18.7177	25.4611	18.7543	24.4285	1.30255	0.381341	0.21539	0.338153
ENSMUST00000131185.7	Npdc1	Npdc1-205	chr2:25407282-25409256	+	processed_transcript	259.598	311.613	249.91	281.978	390.782	403.51	273.707	358.757	1.31073	0.390374	0.119473	0.225347
ENSMUST00000169195.1	Psmd2	Psmd2-205	chr16:20651716-20652754	+	processed_transcript	37.416	46.3886	36.3884	44.5254	84.8962	36.7457	40.0643	55.3891	1.3825	0.467284	0.372018	0.505319
ENSMUST00000131506.1	Pigo	Pigo-203	chr4:43024703-43025467	-	processed_transcript	49.7497	147.119	43.2424	80.238	97.7135	88.7128	80.037	88.8881	1.11059	0.151323	0.8073	0.867572
ENSMUST00000150200.7	Tnks1bp1	Tnks1bp1-206	chr2:85050460-85052052	+	processed_transcript	15.3642	111.873	12.8125	29.4043	22.2454	73.8121	46.6831	41.8206	0.895841	-0.158686	0.900112	0.931355
ENSMUST00000141113.1	Gse1	Gse1-204	chr8:120571329-120575210	+	processed_transcript	129.828	109.041	108.05	108.847	187.577	163.702	115.639	153.375	1.32632	0.40743	0.196346	0.316743
ENSMUST00000134102.1	Ube2o	Ube2o-202	chr11:116537740-116544017	-	processed_transcript	48.8334	180.793	109.365	176.896	121.844	97.753	112.997	132.164	1.16962	0.226045	0.690511	0.777732
ENSMUST00000145400.7	Gm15417	Gm15417-202	chr3:89391850-89398224	+	antisense_RNA	371.288	302.682	288.62	382.876	381.459	483.553	320.863	415.963	1.29639	0.374497	0.0881313	0.179978
ENSMUST00000168139.7	Timm23	Timm23-203	chr14:32180218-32191957	-	processed_transcript	1230.58	957.487	1324.61	1137.4	1670.35	1783.49	1170.89	1530.41	1.30705	0.386315	0.189345	0.309013
ENSMUST00000145183.1	AI413582	AI413582-203	chr17:27564682-27565667	-	processed_transcript	35.7961	5.41241	31.516	18.0629	26.4761	27.567	24.2415	24.0353	0.991497	-0.0123203	0.984477	0.988992
ENSMUST00000192331.1	Qrich1	Qrich1-203	chr9:108517103-108518790	+	processed_transcript	12.1303	62.7018	24.0456	16.0502	51.9	47.2419	32.9592	38.3974	1.165	0.220325	0.788539	0.854519
ENSMUST00000129149.7	E330017L17Rik	E330017L17Rik-201	chr4:129906258-129908751	+	lincRNA	26.2332	43.897	67.1046	51.4516	47.5715	67.6827	45.7449	55.5686	1.21475	0.280658	0.50239	0.615376
ENSMUST00000174829.1	Neat1	Neat1-203	chr19:5843681-5845259	-	lincRNA	41.5855	84.7299	48.3405	67.6587	99.9315	53.2606	58.2186	73.6169	1.26449	0.338556	0.468204	0.585895
ENSMUST00000148957.1	Whrn	Whrn-215	chr4:63425712-63432002	-	processed_transcript	20.4351	14.7115	14.2106	7.04462	26.3133	48.5959	16.4524	27.3179	1.66042	0.73155	0.422425	0.545266
ENSMUST00000150493.1	Actn4	Actn4-208	chr7:28901915-28907686	-	processed_transcript	132.669	125.218	155.201	287.176	99.9606	189.296	137.696	192.144	1.39542	0.480703	0.376739	0.506137
ENSMUST00000134924.1	Ccdc80	Ccdc80-203	chr16:45093675-45095170	+	processed_transcript	28.8638	36.7049	48.5515	22.861	131.977	35.8927	38.0401	63.5768	1.67131	0.74098	0.504662	0.617108
ENSMUST00000134752.7	Ipo13	Ipo13-202	chr4:117894486-117900662	-	processed_transcript	21.8696	37.2718	39.9603	30.1204	54.6254	41.594	33.0339	42.1132	1.27485	0.350327	0.372429	0.505604
ENSMUST00000138323.1	Pfdn2	Pfdn2-203	chr1:171356390-171357970	+	processed_transcript	61.3134	56.131	633.298	242.229	196.316	96.214	250.247	178.253	0.712307	-0.489429	0.732406	0.807763
ENSMUST00000180643.2	2310015A10Rik	2310015A10Rik-201	chr12:80123992-80132844	-	processed_transcript	562.278	323.821	477.329	516.63	531.514	664.118	454.476	570.754	1.25585	0.328665	0.238792	0.365553
ENSMUST00000129033.7	Arpc1b	Arpc1b-204	chr5:145114258-145122795	+	processed_transcript	57.0975	76.347	90.6789	253.504	72.5408	44.9463	74.7078	123.664	1.6553	0.72709	0.500197	0.613435
ENSMUST00000167515.1	Exosc4	Exosc4-202	chr15:76327591-76329095	+	processed_transcript	19.5709	30.6266	31.7467	26.3758	42.467	35.4727	27.3148	34.7719	1.27301	0.34824	0.286318	0.415937
ENSMUST00000176672.1	Ube2e2	Ube2e2-210	chr14:18574363-18597241	-	processed_transcript	18.6907	35.0402	61.3271	23.2651	72.4811	49.7095	38.3527	48.4852	1.26419	0.338219	0.619947	0.720816
ENSMUST00000136110.1	1810058I24Rik	1810058I24Rik-202	chr6:35252732-35262022	+	lincRNA	651.387	486.527	584.277	812.376	750.911	633.077	574.063	732.121	1.27533	0.350872	0.0903744	0.183222
ENSMUST00000125814.8	Srsf5	Srsf5-206	chr12:80945548-80948504	+	processed_transcript	713.644	1364.71	1047.56	1316.4	1087.72	1481.66	1041.97	1295.26	1.24309	0.31393	0.313626	0.446594
ENSMUST00000130962.1	Tecpr1	Tecpr1-203	chr5:144207483-144208639	-	processed_transcript	26.2106	14.2509	20.5039	10.3199	37.0168	41.6008	20.3218	29.6458	1.45882	0.544801	0.418453	0.542363
ENSMUST00000222680.1	2010111I01Rik	2010111I01Rik-220	chr13:63240045-63286864	+	processed_transcript	153.908	197.292	148.356	213.234	311.532	140.404	166.519	221.723	1.33152	0.413079	0.347753	0.480653
ENSMUST00000132486.1	Hadha	Hadha-204	chr5:30119899-30120305	-	processed_transcript	10.3009	67.2116	24.0872	23.8169	48.1859	30.0423	33.8666	34.015	1.00438	0.00630926	0.994026	0.994618
ENSMUST00000212957.1	Gm31659	Gm31659-203	chr8:95808713-95817691	-	lincRNA	9.19686	43.3553	18.4825	8.80955	34.7229	49.8007	23.6782	31.1111	1.31391	0.393865	0.661076	0.754702
ENSMUST00000101162.3	Gm10435	Gm10435-201	chr11:59002910-59007293	+	antisense_RNA	514.036	410.428	317.068	514.181	602.774	446.066	413.844	521.007	1.25895	0.332216	0.214788	0.337524
ENSMUST00000145641.1	Cep131	Cep131-204	chr11:120064434-120064968	-	processed_transcript	33.3015	17.7956	14.32	32.7498	18.6827	28.5536	21.8057	26.662	1.22271	0.290081	0.535438	0.64365
ENSMUST00000155725.1	Mob3b	Mob3b-202	chr4:35083600-35157484	-	processed_transcript	17.1398	11.7661	14.4193	15.0611	45.425	8.71036	14.4417	23.0655	1.59714	0.675494	0.492712	0.606915
ENSMUST00000222823.1	Gm40841	Gm40841-202	chr13:28394453-28420066	-	lincRNA	20.4433	17.2855	13.506	19.1957	16.4822	30.8736	17.0783	22.1838	1.29895	0.377346	0.351783	0.485158
ENSMUST00000201152.1	Gm43050	Gm43050-202	chr5:119831030-119831791	-	lincRNA	58.5992	67.2942	65.7915	69.0153	76.6944	99.9378	63.8949	81.8825	1.28152	0.357854	0.13654	0.246556
ENSMUST00000129614.1	Cbx6	Cbx6-205	chr15:79833245-79834274	-	processed_transcript	43.0478	14.0813	45.7664	33.6431	41.6124	40.3895	34.2985	38.5483	1.12391	0.168523	0.704729	0.787059
ENSMUST00000135214.1	Shank3	Shank3-205	chr15:89500123-89503421	+	processed_transcript	92.4588	83.834	67.4361	69.6847	103.294	147.904	81.243	106.961	1.31656	0.396772	0.340917	0.473412
ENSMUST00000131178.7	Rgp1	Rgp1-204	chr4:43578954-43580923	+	processed_transcript	21.5392	17.6014	23.702	7.82928	40.7227	57.2098	20.9475	35.2539	1.68296	0.751003	0.383334	0.512809
ENSMUST00000141794.1	Tcaf1	Tcaf1-204	chr6:42690299-42693008	-	processed_transcript	25.2219	9.53196	16.2283	25.7299	10.2367	29.9442	16.994	21.9703	1.29282	0.370523	0.544353	0.651104
ENSMUST00000028677.4	Hypk	Hypk-201	chr2:121457134-121458363	+	processed_transcript	27.3843	28.0449	1	1	40.4176	38.3949	18.8097	26.6042	1.41439	0.500175	0.643696	0.740566
ENSMUST00000130323.7	Stard3	Stard3-202	chr11:98375520-98378648	+	processed_transcript	37.989	20.113	21.2275	18.6174	22.2658	78.8543	26.4432	39.9125	1.50937	0.593943	0.544017	0.650856
ENSMUST00000213927.1	Rbpms2	Rbpms2-203	chr9:65631077-65651043	+	processed_transcript	34.6412	74.4575	28.6021	33.561	87.4463	50.4528	45.9003	57.1534	1.24516	0.316336	0.627581	0.726673
ENSMUST00000181086.1	Gm26752	Gm26752-201	chr10:3364073-3367135	-	lincRNA	54.7199	57.2946	44.9052	75.9157	63.3498	58.7033	52.3066	65.9896	1.26159	0.335246	0.098494	0.195206
ENSMUST00000138813.7	Ppara	Ppara-206	chr15:85735639-85777727	+	processed_transcript	36.1564	72.8268	39.297	64.7	74.7132	42.88	49.4267	60.7644	1.22938	0.297934	0.49274	0.606802
ENSMUST00000212677.1	Sin3b	Sin3b-207	chr8:72756685-72757299	+	processed_transcript	16.4122	18.5895	40.557	14.9697	32.7675	50.4505	25.1862	32.7292	1.29949	0.377944	0.587914	0.691874
ENSMUST00000084587.1	2510046G10Rik	2510046G10Rik-201	chr7:126649223-126649570	-	antisense_RNA	30.0802	41.7838	28.4669	46.9145	27.9432	54.5713	33.4436	43.143	1.29002	0.367395	0.339834	0.47256
ENSMUST00000145721.1	Scp2	Scp2-208	chr4:108044268-108047879	-	processed_transcript	27.157	14.4067	18.4149	35.0359	23.4692	17.5177	19.9929	25.3409	1.2675	0.341984	0.448619	0.567875
ENSMUST00000149127.1	Abca1	Abca1-202	chr4:53035488-53040926	-	processed_transcript	22.9255	35.6922	20.5616	30.845	21.8097	49.8206	26.3931	34.1585	1.29422	0.372081	0.459503	0.577157
ENSMUST00000032900.3	Sox6os	Sox6os-201	chr7:116031979-116032550	+	antisense_RNA	70.4466	79.4441	78.6317	82.9078	89.9249	117.389	76.1741	96.7406	1.26999	0.34482	0.132402	0.242033
ENSMUST00000194633.1	Klhdc8b	Klhdc8b-213	chr9:108448268-108450369	-	processed_transcript	1	1	40.8394	1	1	81.0446	14.2798	27.6815	1.93851	0.954947	0.676241	0.767148
ENSMUST00000154888.1	Acly	Acly-206	chr11:100498248-100499098	-	processed_transcript	41.0593	20.4476	43.3978	17.83	56.9073	71.251	34.9682	48.6628	1.39163	0.476774	0.478784	0.594117
ENSMUST00000147093.1	C1qtnf6	C1qtnf6-203	chr15:78523346-78529625	-	processed_transcript	23.7651	27.2941	47.5987	24.1588	53.6635	47.0304	32.886	41.6176	1.26551	0.33972	0.494187	0.60784
ENSMUST00000210535.1	Pde2a	Pde2a-210	chr7:101460944-101494680	+	processed_transcript	270.428	162.053	213.554	185.73	181.023	548.788	215.345	305.18	1.41717	0.50301	0.514515	0.625363
ENSMUST00000139110.1	Ddx58	Ddx58-206	chr4:40226570-40228356	-	processed_transcript	21.0413	78.4017	62.8569	74.2249	65.7948	41.6098	54.1	60.5432	1.1191	0.162336	0.760257	0.831201
ENSMUST00000193193.1	4833445I07Rik	4833445I07Rik-201	chr9:108567533-108569174	+	lincRNA	46.5581	43.3856	50.5526	45.1012	68.3918	64.6894	46.8321	59.3941	1.26824	0.342823	0.170036	0.286501
ENSMUST00000162154.1	Fyb	Fyb-206	chr15:6654511-6663313	+	processed_transcript	209.517	303.603	176.813	207.293	355.015	298.372	229.978	286.893	1.24748	0.319017	0.377607	0.506628
ENSMUST00000159663.7	Gas5	Gas5-209	chr1:161035166-161038539	+	lincRNA	25.5679	30.4497	32.0648	31.1246	45.2646	34.5758	29.3608	36.9883	1.25979	0.333178	0.178695	0.295654
ENSMUST00000135602.2	Ndufc1	Ndufc1-202	chr3:51405478-51408666	-	processed_transcript	137.6	20.4766	101.482	64.2943	83.339	104.073	86.5195	83.9021	0.969748	-0.0443177	0.946252	0.962297
ENSMUST00000154519.1	Commd3	Commd3-211	chr2:18672436-18674512	+	processed_transcript	129.151	302.793	73.6925	125.159	225.365	198.917	168.546	183.147	1.08663	0.119863	0.85558	0.902137
ENSMUST00000133404.1	Snrnp27	Snrnp27-204	chr6:86682676-86684517	-	processed_transcript	81.7506	68.5072	60.6377	113.405	64.659	90.0929	70.2985	89.3857	1.27152	0.34655	0.282004	0.411688
ENSMUST00000220927.1	Ppp1r13b	Ppp1r13b-204	chr12:111866498-111907619	-	processed_transcript	9.39801	15.5734	32.1995	13.3383	34.3465	19.9987	19.057	22.5612	1.18388	0.243524	0.722864	0.801803
ENSMUST00000134213.1	Osbpl6	Osbpl6-207	chr2:76406561-76407467	+	processed_transcript	45.0976	65.7654	21.2645	40.0304	42.8918	70.8359	44.0425	51.2527	1.16371	0.218732	0.678964	0.767644
ENSMUST00000216321.1	AC122428.2	AC122428.2-201	chr9:44477928-44479759	-	lincRNA	44.0204	50.302	32.7823	43.0793	41.8945	77.185	42.3682	54.0529	1.27579	0.351389	0.408095	0.533191
ENSMUST00000178331.7	Rab10os	Rab10os-204	chr12:3235526-3238273	+	antisense_RNA	76.3737	14.2868	45.4952	27.3912	55.393	62.7489	45.3852	48.511	1.06887	0.0960891	0.888407	0.923988
ENSMUST00000155506.1	Slc43a3	Slc43a3-205	chr2:84936689-84937681	+	processed_transcript	17.6237	18.0272	26.9446	26.6886	37.5903	16.3616	20.8652	26.8802	1.28828	0.365445	0.428994	0.551345
ENSMUST00000203121.1	D830050J10Rik	D830050J10Rik-201	chr6:115675995-115677136	+	bidirectional_promoter_lncRNA	397.6	510.348	350.713	494.966	526.276	522.815	419.554	514.686	1.22675	0.294836	0.120771	0.226778
ENSMUST00000215355.1	Fam214a	Fam214a-204	chr9:74953026-74954196	+	processed_transcript	16.6848	20.255	15.6192	12.6158	19.7384	40.4819	17.5197	24.2787	1.3858	0.470717	0.469817	0.587038
ENSMUST00000139037.1	Rdm1	Rdm1-203	chr11:101627972-101633832	+	processed_transcript	18.7568	33.2652	39.9859	28.3568	41.9419	39.8331	30.6693	36.7106	1.19698	0.2594	0.468641	0.58615
ENSMUST00000135494.3	Lmna	Lmna-204	chr3:88481846-88503337	-	processed_transcript	13.8442	36.7653	33.3416	32.0096	45.3097	22.1509	27.9837	33.1568	1.18486	0.244717	0.625417	0.725335
ENSMUST00000220428.1	Ube2n	Ube2n-206	chr10:95515654-95541778	+	processed_transcript	127.626	83.0388	109.187	139.293	129.989	120.818	106.617	130.033	1.21963	0.286438	0.169531	0.285842
ENSMUST00000155185.1	C130080G10Rik	C130080G10Rik-204	chr2:114056313-114064868	+	antisense_RNA	623.171	534.189	530.974	634.227	857.898	613.763	562.778	701.963	1.24732	0.318829	0.172164	0.288352
ENSMUST00000204480.1	Zyx	Zyx-211	chr6:42355137-42356261	+	processed_transcript	24.1865	55.1553	25.1205	29.7677	30.2588	70.2588	34.8208	43.4284	1.2472	0.31869	0.636085	0.733653
ENSMUST00000136670.1	Ipo13	Ipo13-203	chr4:117895340-117895892	-	processed_transcript	17.5035	27.9823	10.79	18.9353	17.5394	30.0436	18.7586	22.1728	1.18201	0.241238	0.620797	0.721471
ENSMUST00000135674.1	1700084C06Rik	1700084C06Rik-201	chr9:21091755-21128393	+	antisense_RNA	9.06869	7.14298	8.09394	33.2496	1	29.7526	8.10187	21.3341	2.63323	1.39683	0.265573	0.394795
ENSMUST00000228705.1	Gm10110	Gm10110-202	chr14:89896228-89899447	-	processed_transcript	66.7075	72.3167	64.7038	89.353	89.1729	73.882	67.9093	84.1359	1.23895	0.309112	0.0444684	0.110633
ENSMUST00000128623.1	Trim16	Trim16-204	chr11:62833800-62841457	+	processed_transcript	29.569	34.884	13.541	27.5088	45.804	20.8848	25.998	31.3992	1.20776	0.272329	0.612012	0.713235
ENSMUST00000148359.7	Dhx35	Dhx35-207	chr2:158794891-158818405	+	processed_transcript	21.653	27.2069	27.2754	27.4726	30.841	35.6898	25.3784	31.3345	1.23469	0.304149	0.120421	0.226458
ENSMUST00000144882.1	Ankrd9	Ankrd9-206	chr12:110977972-110978579	-	processed_transcript	179.707	219.242	179.65	249.348	225.879	236.357	192.866	237.195	1.22984	0.29847	0.0403909	0.103662
ENSMUST00000172584.1	Abhd16a	Abhd16a-202	chr17:35096352-35100940	+	processed_transcript	49.8328	55.8169	43.0749	54.3889	71.6416	57.7985	49.5749	61.2763	1.23604	0.305721	0.143016	0.25523
ENSMUST00000198852.1	Gm43514	Gm43514-201	chr5:100820330-100820753	-	sense_intronic	32.9069	45.882	11.6199	24.2586	31.0025	43.7682	30.1363	33.0097	1.09535	0.131391	0.815147	0.873396
ENSMUST00000224463.1	Rps23	Rps23-203	chr13:90923217-90924723	+	processed_transcript	75.663	483.858	206.536	131.44	461.65	233.79	255.353	275.627	1.0794	0.110225	0.902207	0.932373
ENSMUST00000085290.3	Phyhd1	Phyhd1-201	chr2:30266851-30279526	+	processed_transcript	37.9523	63.7687	42.5693	46.657	45.418	91.1713	48.0968	61.0821	1.26998	0.34481	0.487985	0.602862
ENSMUST00000125288.7	Mpdz	Mpdz-205	chr4:81320346-81333041	-	processed_transcript	16.0574	19.8886	18.2819	28.6841	44.3149	8.5995	18.076	27.1995	1.50474	0.589509	0.429724	0.551861
ENSMUST00000136284.1	Poldip2	Poldip2-203	chr11:78512388-78513980	+	processed_transcript	62.2472	102.52	99.3071	94.2005	125.852	99.7802	88.0248	106.611	1.21115	0.276373	0.314971	0.448129
ENSMUST00000137898.1	Fbxw11	Fbxw11-204	chr11:32642784-32652904	+	processed_transcript	187.425	253.896	159.227	200.818	329.506	213.72	200.183	248.015	1.23894	0.309109	0.389606	0.518035
ENSMUST00000142368.7	Mrvi1	Mrvi1-205	chr7:110923860-110982058	-	processed_transcript	28.7779	19.5286	23.6398	21.6263	23.507	48.7357	23.9821	31.2897	1.30471	0.383727	0.468791	0.586192
ENSMUST00000138412.1	Atox1	Atox1-202	chr11:55446644-55461197	-	processed_transcript	34.9086	61.8614	43.8649	67.4036	103.284	25.3074	46.8783	65.3315	1.39364	0.478859	0.48291	0.597911
ENSMUST00000139388.2	Akt1	Akt1-207	chr12:112659266-112668114	-	processed_transcript	98.1546	63.4916	86.189	69.4674	82.4241	174.287	82.6117	108.726	1.31611	0.396282	0.4915	0.605867
ENSMUST00000126463.1	1700021F05Rik	1700021F05Rik-201	chr10:43533154-43540994	-	processed_transcript	74.36	137.331	48.134	70.9507	126.7	101.501	86.6084	99.7172	1.15136	0.203335	0.694035	0.779957
ENSMUST00000138859.1	Usp8	Usp8-203	chr2:126707328-126759248	+	processed_transcript	3.68153	2.91268	17.7116	281.064	1.20779	1.03777	8.10194	94.4366	11.6561	3.54301	0.40779	0.53293
ENSMUST00000136248.1	Tanc1	Tanc1-207	chr2:59779711-59785499	+	processed_transcript	25.8064	44.3361	51.7082	30.4702	67.8553	52.8227	40.6169	50.3827	1.24044	0.310849	0.503997	0.616745
ENSMUST00000218492.1	Ndufa4l2	Ndufa4l2-203	chr10:127514967-127516686	+	processed_transcript	45.8482	88.6683	1	19.0453	22.2869	17.5528	45.1722	19.6283	0.434523	-1.2025	0.370605	0.503806
ENSMUST00000162287.7	Zdhhc4	Zdhhc4-211	chr5:143320382-143329211	-	processed_transcript	74.5417	47.9923	43.1694	49.0564	63.0379	91.2184	55.2345	67.7709	1.22697	0.295097	0.47129	0.587858
ENSMUST00000127044.1	Plcb4	Plcb4-203	chr2:135887694-135939306	+	processed_transcript	43.73	4.78639	66.921	167.791	92.251	1.65077	38.4791	87.2308	2.26696	1.18076	0.39604	0.523276
ENSMUST00000147439.7	Clpb	Clpb-207	chr7:101682116-101763695	+	processed_transcript	52.0616	24.9267	20.1138	49.8099	32.4535	29.2243	32.3673	37.1626	1.14815	0.199312	0.705775	0.787878
ENSMUST00000142672.7	Smad4	Smad4-205	chr18:73640223-73662775	-	processed_transcript	36.0477	32.2265	33.6177	31.272	58.0637	38.7979	33.964	42.7112	1.25754	0.33061	0.338598	0.472013
ENSMUST00000155927.1	Camk1d	Camk1d-204	chr2:5565486-5714503	-	processed_transcript	51.7083	64.9634	27.5974	75.0152	24.2606	91.8356	48.0897	63.7038	1.32469	0.405651	0.535614	0.643708
ENSMUST00000182702.7	Sipa1l3	Sipa1l3-209	chr7:29400867-29518641	-	processed_transcript	88.5517	90.0484	105.424	92.6308	128.093	127.606	94.6746	116.11	1.22641	0.294441	0.172422	0.288304
ENSMUST00000176457.1	C3	C3-202	chr17:57215788-57219972	-	processed_transcript	41.6162	22.7025	37.2517	40.8829	23.9092	64.6357	33.8568	43.1426	1.27427	0.349668	0.518216	0.628497
ENSMUST00000209788.1	Gm45844	Gm45844-203	chr7:7234455-7278210	-	processed_transcript	35.0597	68.545	6.08651	9.74066	53.371	50.2288	36.5637	37.7801	1.03327	0.0472145	0.960132	0.9719
ENSMUST00000132287.7	Npdc1	Npdc1-206	chr2:25400469-25408178	+	processed_transcript	38.6267	27.9982	40.6715	59.5286	33.8246	38.8909	35.7654	44.0814	1.23251	0.301603	0.397574	0.524339
ENSMUST00000150028.1	Coro7	Coro7-210	chr16:4627377-4628871	-	processed_transcript	21.9908	20.5203	24.2751	17.6657	34.5273	31.9326	22.2621	28.0419	1.25963	0.332995	0.341137	0.473326
ENSMUST00000150348.1	Slc39a13	Slc39a13-210	chr2:91064641-91066176	-	processed_transcript	28.9366	40.1638	34.9699	46.2353	42.4506	36.8041	34.6901	41.83	1.20582	0.270015	0.167981	0.28399
ENSMUST00000209642.1	Gm42067	Gm42067-201	chr19:5912822-5914593	+	antisense_RNA	16.5958	18.866	27.3923	49.6842	57.6652	5.3153	20.9513	37.5549	1.79248	0.841958	0.374118	0.504364
ENSMUST00000135971.1	Inpp5b	Inpp5b-202	chr4:124795285-124797894	+	processed_transcript	29.198	22.0135	19.2956	46.2413	15.3598	30.9606	23.5023	30.8539	1.3128	0.39265	0.477499	0.593546
ENSMUST00000126550.1	Trafd1	Trafd1-203	chr5:121384161-121385360	-	processed_transcript	123.768	144.224	149.743	189.881	118.766	209.442	139.245	172.696	1.24023	0.310613	0.307978	0.439919
ENSMUST00000139846.1	Eif1	Eif1-203	chr11:100320518-100321349	+	processed_transcript	60.3749	74.3403	52.2677	58.9368	97.3716	72.2201	62.3276	76.1762	1.22219	0.289468	0.346237	0.479479
ENSMUST00000162149.1	AW554918	AW554918-207	chr18:25169020-25290908	+	processed_transcript	21.5363	25.7456	12.6182	10.6752	39.4706	29.2424	19.9667	26.4627	1.32534	0.406365	0.522242	0.631706
ENSMUST00000144171.1	Fkbp1a	Fkbp1a-208	chr2:151542696-151557475	+	processed_transcript	29.5742	46.1179	43.0394	69.8256	38.239	38.6117	39.5772	48.8921	1.23536	0.304932	0.468214	0.585762
ENSMUST00000197762.1	Gm8066	Gm8066-201	chr5:137510253-137517501	+	lincRNA	438.69	532.803	351.084	484.996	495.04	599.577	440.859	526.537	1.19434	0.256218	0.251636	0.379563
ENSMUST00000140944.7	Idh3g	Idh3g-205	chrX:73780074-73786622	-	processed_transcript	54.3687	86.6319	53.5947	101.464	84.6347	51.4533	64.8651	79.1839	1.22075	0.287765	0.477344	0.5935
ENSMUST00000175838.1	Foxp1	Foxp1-216	chr6:99435236-99522721	-	processed_transcript	64.5774	84.6679	90.6862	56.0386	126.778	122.041	79.9772	101.619	1.2706	0.345515	0.420956	0.544208
ENSMUST00000148067.7	Vav2	Vav2-205	chr2:27268919-27278879	-	processed_transcript	12.5696	7.74857	17.6038	51.1161	13.4599	4.34269	12.6407	22.9729	1.81738	0.861862	0.518075	0.628477
ENSMUST00000144635.1	Smtn	Smtn-206	chr11:3520538-3522554	-	processed_transcript	1808.98	1702.63	1642.04	2184.91	1795.32	2246.18	1717.88	2075.47	1.20815	0.272804	0.0748576	0.160209
ENSMUST00000133288.1	Flna	Flna-210	chrX:74236081-74237925	-	processed_transcript	38.556	115.555	42.3089	70.8442	53.5029	86.4827	65.4733	70.2766	1.07336	0.102137	0.866536	0.909313
ENSMUST00000130421.7	Med8	Med8-207	chr4:118409356-118413833	+	processed_transcript	33.9112	36.3488	33.2743	77.045	62.0974	14.8993	34.5114	51.3472	1.48783	0.573213	0.420024	0.54356
ENSMUST00000113353.4	Frmd4b	Frmd4b-202	chr6:97324316-97487803	-	processed_transcript	30.5253	8.16904	47.6927	111.353	38.313	4.79007	28.7957	51.4853	1.78795	0.838308	0.535081	0.643374
ENSMUST00000128336.7	Irf1	Irf1-205	chr11:53770071-53776378	+	processed_transcript	80.2716	25.2347	19.0131	63.281	56.2009	18.603	41.5065	46.0283	1.10894	0.149185	0.859139	0.904376
ENSMUST00000190945.6	Pign	Pign-211	chr1:105521137-105568948	-	processed_transcript	1	47.348	71.5991	11.3641	14.9821	34.1677	39.9824	20.1713	0.504505	-0.98706	0.416548	0.540868
ENSMUST00000127029.1	Iqcc	Iqcc-203	chr4:129615759-129617033	-	processed_transcript	22.2648	42.6163	11.9361	40.0922	30.2392	15.958	25.6057	28.7631	1.12331	0.167752	0.795801	0.858511
ENSMUST00000017077.13	Plcg1	Plcg1-201	chr2:160740987-160762506	+	processed_transcript	5.24357	43.9838	5.65508	2.8439	374.908	2.08891	18.2942	126.614	6.92099	2.79098	0.43443	0.55691
ENSMUST00000145725.1	Clcnkb	Clcnkb-204	chr4:141414296-141415961	-	processed_transcript	27.4347	13.2185	10.6974	31.8216	33.272	6.24216	17.1169	23.7786	1.38919	0.474245	0.549616	0.655842
ENSMUST00000038121.4	Gm7008	Gm7008-201	chr12:40222758-40225238	+	antisense_RNA	16.5067	29.2397	20.9331	21.3241	27.4537	29.3307	22.2265	26.0362	1.1714	0.228237	0.439883	0.56133
ENSMUST00000139677.1	Gm14453	Gm14453-201	chr2:173025685-173034580	-	antisense_RNA	25.3169	30.8294	17.9626	45.4509	44.1125	11.8759	24.7029	33.8131	1.36879	0.4529	0.47583	0.592201
ENSMUST00000147933.1	Med1	Med1-207	chr11:98157753-98161022	-	processed_transcript	68.2854	53.3426	52.4057	111.933	44.3803	65.207	58.0112	73.8402	1.27286	0.348074	0.485595	0.60035
ENSMUST00000143205.1	Rars	Rars-203	chr11:35815668-35820109	-	processed_transcript	33.2848	23.512	25.0744	31.3803	40.6639	26.0417	27.2904	32.6953	1.19805	0.260689	0.360439	0.494389
ENSMUST00000226976.1	Mtss1	Mtss1-204	chr15:58943360-59040597	-	processed_transcript	5.42176	6.01023	27.8116	54.7685	8.32448	3.36354	13.0812	22.1522	1.69343	0.759951	0.63993	0.736739
ENSMUST00000161671.1	Aggf1	Aggf1-202	chr13:95353502-95375334	-	processed_transcript	57.518	59.061	53.1339	88.6989	170.081	20.1976	56.571	92.9926	1.64382	0.717055	0.448166	0.567587
ENSMUST00000150410.1	Gfpt1	Gfpt1-206	chr6:87042850-87053959	+	processed_transcript	20.6703	14.6331	21.7628	25.1061	96.08	4.58864	19.0221	41.9249	2.20401	1.14013	0.45641	0.574417
ENSMUST00000143007.1	Anapc1	Anapc1-207	chr2:128659600-128664020	-	processed_transcript	47.886	22.0049	18.3311	56.988	20.9343	27.149	29.4073	35.0237	1.19099	0.252158	0.718273	0.798469
ENSMUST00000166620.1	P4hb	P4hb-202	chr11:120560305-120561236	-	processed_transcript	186.295	89.9653	207.188	77.3646	190.941	393.505	161.15	220.604	1.36894	0.453055	0.581451	0.68603
ENSMUST00000146244.7	Mif4gd	Mif4gd-209	chr11:115608417-115612899	-	processed_transcript	35.8088	30.0106	32.3768	103.348	34.4552	16.1982	32.7321	51.3339	1.5683	0.649206	0.522724	0.631986
ENSMUST00000144045.7	Hectd2os	Hectd2os-204	chr19:36645683-36689273	-	processed_transcript	176.557	133.255	140.542	184.536	254.076	116.53	150.118	185.048	1.23268	0.301799	0.451396	0.570101
ENSMUST00000131902.1	Blcap	Blcap-203	chr2:157565591-157566331	-	processed_transcript	175.758	123.307	139.246	185.775	144.083	185.895	146.104	171.918	1.17668	0.234727	0.283378	0.413095
ENSMUST00000141556.1	Mrps7	Mrps7-202	chr11:115604867-115607001	+	processed_transcript	45.5973	28.8024	64.7959	57.4609	47.5766	51.1898	46.3985	52.0758	1.12236	0.166533	0.626653	0.726433
ENSMUST00000140409.1	4933407K13Rik	4933407K13Rik-204	chrX:75731068-75755600	-	processed_transcript	15.592	27.9698	22.8099	25.9585	28.7167	21.9385	22.1239	25.5379	1.15431	0.207036	0.451199	0.569996
ENSMUST00000126701.7	Aqr	Aqr-204	chr2:114132987-114141143	-	processed_transcript	17.3859	33.3819	55.7242	17.9822	60.1588	49.1396	35.4973	42.4269	1.19521	0.257268	0.701569	0.785097
ENSMUST00000150687.1	Slfn5	Slfn5-204	chr11:82951349-82952170	+	processed_transcript	114.672	94.3341	147.577	123.434	146.129	144.715	118.861	138.092	1.1618	0.216357	0.325181	0.459025
ENSMUST00000150417.7	Iffo1	Iffo1-208	chr6:125149007-125151487	+	processed_transcript	74.8354	56.6181	34.0388	51.7475	55.0935	82.6688	55.1641	63.1699	1.14513	0.195509	0.629236	0.728087
ENSMUST00000161018.7	Zfp346	Zfp346-206	chr13:55105311-55122478	+	processed_transcript	23.9753	9.8018	19.659	423.989	1.67232	10.6324	17.812	145.431	8.16477	3.02941	0.411628	0.536416
ENSMUST00000142725.7	Dmpk	Dmpk-211	chr7:19086500-19093819	+	processed_transcript	971.707	643.475	1137.03	947.709	1158.24	1055.41	917.405	1053.79	1.14866	0.199955	0.43474	0.557167
ENSMUST00000145164.7	Pisd-ps1	Pisd-ps1-203	chr11:3125904-3129396	+	processed_transcript	18.6937	12.8994	21.5291	11.2287	23.0875	32.474	17.7074	22.2634	1.2573	0.330324	0.530953	0.639938
ENSMUST00000143351.1	Nup85	Nup85-208	chr11:115580504-115581419	+	processed_transcript	149.115	111.936	63.6765	81.9275	159.919	131.544	108.243	124.464	1.14985	0.201452	0.654803	0.75009
ENSMUST00000125658.1	Caskin2	Caskin2-202	chr11:115800000-115800881	-	processed_transcript	33.2657	21.4795	22.5549	22.2531	36.7169	31.9309	25.7667	30.3003	1.17595	0.233826	0.469415	0.586681
ENSMUST00000218439.1	Mob3a	Mob3a-203	chr10:80699828-80701828	-	processed_transcript	42.8489	43.8233	49.8532	41.7272	58.4743	61.972	45.5085	54.0578	1.18786	0.248369	0.266142	0.395523
ENSMUST00000156320.1	Plekhh3	Plekhh3-205	chr11:101164167-101165324	-	processed_transcript	32.9347	42.4524	54.8177	49.4509	62.026	40.3488	43.4016	50.6086	1.16605	0.221634	0.464574	0.58222
ENSMUST00000135234.1	Atp2a3	Atp2a3-205	chr11:72982097-72983545	+	processed_transcript	11.0499	16.5765	24.4393	8.00862	28.9819	31.1195	17.3552	22.7034	1.30816	0.387534	0.55598	0.662338
ENSMUST00000143903.1	Pld3	Pld3-206	chr7:27542816-27553151	-	processed_transcript	18.1673	20.805	2.91271	52.9182	13.3816	2.46838	13.9617	22.9227	1.64183	0.715307	0.61191	0.713447
ENSMUST00000123273.1	Rfng	Rfng-202	chr11:120780746-120784185	-	processed_transcript	130.603	219.82	69.6074	184.6	126.243	136.026	140.01	148.957	1.0639	0.0893624	0.858899	0.904502
ENSMUST00000137456.7	Hmgn2	Hmgn2-210	chr4:133965440-133967275	-	processed_transcript	37.498	44.8928	42.2645	70.9866	27.5632	57.3604	41.5518	51.9701	1.25073	0.322771	0.467897	0.585656
ENSMUST00000142778.1	Akirin1	Akirin1-202	chr4:123737814-123743507	-	processed_transcript	16.9617	27.4722	38.5747	29.6038	27.2931	35.0327	27.6695	30.6432	1.10747	0.147271	0.677813	0.767721
ENSMUST00000176976.1	Fbxw17	Fbxw17-210	chr13:50423855-50427290	+	processed_transcript	8.45721	43.9756	10.2477	3.64507	42.8677	38.3699	20.8935	28.2942	1.35421	0.437453	0.68479	0.77267
ENSMUST00000128401.1	Rexo4	Rexo4-205	chr2:26962879-26964324	-	processed_transcript	11.9123	14.2685	18.5045	5.65775	50.7346	17.2368	14.8951	24.5431	1.64773	0.720479	0.518757	0.62885
ENSMUST00000141161.1	Srebf1	Srebf1-206	chr11:60200130-60201040	-	processed_transcript	21.6597	19.5199	17.2159	23.6147	25.3549	19.0924	19.4652	22.6874	1.16554	0.220994	0.227902	0.352632
ENSMUST00000141106.7	Npdc1	Npdc1-210	chr2:25403239-25407111	+	processed_transcript	32.4394	55.3633	26.899	35.7402	42.5822	49.7286	38.2339	42.6837	1.11638	0.158831	0.667195	0.760138
ENSMUST00000120593.4	Bcl7a	Bcl7a-203	chr5:123343834-123374082	+	processed_transcript	33.7719	133.264	75.7457	71.2838	70.8744	105.606	80.9271	82.588	1.02052	0.0293091	0.959905	0.972061
ENSMUST00000145607.1	Tubb4b	Tubb4b-202	chr2:25223523-25224654	-	processed_transcript	63.2317	58.9193	68.8931	52.3606	64.7931	118.37	63.6814	78.5078	1.23282	0.301965	0.508712	0.621156
ENSMUST00000206201.1	AV356131	AV356131-201	chr7:116443575-116444324	+	bidirectional_promoter_lncRNA	39.9843	34.5726	45.4119	29.8249	56.1012	58.6947	39.9896	48.2069	1.20549	0.269617	0.446261	0.566741
ENSMUST00000214512.1	Pts	Pts-205	chr9:50522529-50528645	-	processed_transcript	16.8683	1	37.7513	30.3617	1	32.7844	18.5398	21.382	1.1533	0.205771	0.8566	0.902835
ENSMUST00000129422.1	Phb2	Phb2-203	chr6:124715363-124716539	+	processed_transcript	26.7801	51.2607	11.8443	32.623	35.5059	21.8048	29.9617	29.9779	1.00054	0.0007795	0.999006	0.999205
ENSMUST00000162663.1	Tyw5	Tyw5-208	chr1:57388405-57390771	-	processed_transcript	57.3518	42.4393	27.827	18.068	102.706	56.6575	42.5393	59.144	1.39034	0.475433	0.55644	0.66273
ENSMUST00000127439.1	Atp5b	Atp5b-207	chr10:128083306-128084086	+	processed_transcript	33.4431	39.8873	28.3274	52.056	37.9667	29.649	33.8859	39.8906	1.1772	0.235361	0.459535	0.577053
ENSMUST00000206959.1	A730056A06Rik	A730056A06Rik-202	chr7:73316253-73375774	-	antisense_RNA	15.9905	12.1121	34.6417	7.27988	66.7568	21.3966	20.9148	31.8111	1.52099	0.605007	0.601472	0.703066
ENSMUST00000182863.1	Gm5914	Gm5914-202	chr8:105624336-105637350	-	lincRNA	53.9718	24.6428	24.4142	46.2033	23.893	45.4482	34.3429	38.5148	1.12148	0.165401	0.750379	0.822365
ENSMUST00000138784.1	Mn1	Mn1-202	chr5:111417362-111418073	+	processed_transcript	144.461	81.0273	72.0162	127.45	217.494	46.968	99.1681	130.637	1.31733	0.397621	0.593109	0.695713
ENSMUST00000228071.1	Tnrc6b	Tnrc6b-207	chr15:80798715-80919235	+	processed_transcript	247.123	368.011	38.6878	126.3	200.696	213.432	217.94	180.143	0.826569	-0.274793	0.724507	0.803095
ENSMUST00000141826.1	Hgs	Hgs-206	chr11:120467635-120475319	+	processed_transcript	19.5384	28.3304	22.588	39.7985	16.5915	28.7874	23.4856	28.3925	1.20893	0.273732	0.531919	0.640796
ENSMUST00000205527.1	2310002F09Rik	2310002F09Rik-203	chr7:43796824-43797958	-	antisense_RNA	27.5329	16.3758	60.6129	65.4629	8.25698	76.6087	34.8405	50.1095	1.43825	0.524319	0.574268	0.679624
ENSMUST00000135891.1	Ubr1	Ubr1-204	chr2:120873050-120889849	-	processed_transcript	28.0746	26.4286	41.8555	40.8127	24.2014	47.3781	32.1196	37.4641	1.16639	0.222056	0.561647	0.668141
ENSMUST00000123704.8	Uqcrc2	Uqcrc2-202	chr7:120635515-120651203	+	processed_transcript	22.4644	33.013	24.444	36.9544	24.9539	29.4026	26.6405	30.437	1.14251	0.192205	0.470599	0.587432
ENSMUST00000150437.7	Dpm1	Dpm1-207	chr2:168211384-168230076	-	processed_transcript	87.1526	146.608	156.411	163.137	203.713	89.7943	130.057	152.215	1.17037	0.226963	0.606894	0.708418
ENSMUST00000157063.1	Ndufs7	Ndufs7-206	chr10:80249485-80256794	+	processed_transcript	1665.34	1663.97	2043.19	1552.42	2390.34	2265.25	1790.83	2069.34	1.15552	0.20854	0.391066	0.519292
ENSMUST00000149559.1	Vamp2	Vamp2-204	chr11:69088543-69090050	+	processed_transcript	95.3127	112.38	75.5441	98.8236	110.557	109.79	94.4124	106.39	1.12687	0.172316	0.348834	0.482014
ENSMUST00000148568.1	Hopxos	Hopxos-201	chr5:77094532-77102303	+	antisense_RNA	29.964	41.2279	18.5	27.1136	36.2043	34.3959	29.8973	32.5713	1.08944	0.123584	0.726498	0.804948
ENSMUST00000039939.6	Szrd1	Szrd1-201	chr4:141113001-141139775	-	processed_transcript	56.8109	114.9	150.127	177.117	104.571	77.9794	107.279	119.889	1.11755	0.160334	0.769562	0.83937
ENSMUST00000124133.7	Sh2d3c	Sh2d3c-203	chr2:32727706-32744844	+	processed_transcript	291.208	80.2747	90.1042	238.078	182.919	71.0327	153.862	164.01	1.06595	0.0921445	0.910191	0.937931
ENSMUST00000152049.1	Gtf2h2	Gtf2h2-209	chr13:100488787-100492553	-	processed_transcript	38.1135	40.5011	71.6656	44.053	42.2078	87.3077	50.0934	57.8562	1.15497	0.20785	0.692841	0.779137
ENSMUST00000160990.1	Zhx2	Zhx2-202	chr15:57695729-57821110	+	processed_transcript	21.3955	13.6878	15.5453	13.5357	8.98494	54.9298	16.8762	25.8168	1.52978	0.613323	0.578343	0.683163
ENSMUST00000130404.1	Ifngr2	Ifngr2-203	chr16:91561323-91565169	+	processed_transcript	46.1773	42.4107	42.6364	42.5936	54.3169	52.9502	43.7415	49.9536	1.14202	0.191585	0.186135	0.305057
ENSMUST00000130796.1	Lama5	Lama5-203	chr2:180176373-180179643	-	processed_transcript	9.48116	22.58	20.6187	1	265.07	24.409	17.56	96.8263	5.51403	2.46311	0.401278	0.527292
ENSMUST00000181819.1	Gm16740	Gm16740-201	chr3:95217457-95226658	+	antisense_RNA	40.3363	61.9194	69.4239	42.8841	84.6731	69.8266	57.2265	65.7946	1.14972	0.201285	0.598895	0.70103
ENSMUST00000135893.1	Nup85	Nup85-205	chr11:115564525-115569891	+	processed_transcript	20.8835	25.9627	22.862	42.6688	27.0126	15.7245	23.2361	28.4686	1.22519	0.293006	0.546411	0.653255
ENSMUST00000221783.1	Trappc12	Trappc12-205	chr12:28700774-28701609	-	processed_transcript	20.2691	37.4023	13.2364	24.6069	29.8155	19.9575	23.6359	24.7933	1.04897	0.0689684	0.888093	0.924042
ENSMUST00000140115.1	Sdccag3	Sdccag3-213	chr2:26387013-26389295	-	processed_transcript	28.4149	25.1568	16.9235	49.3089	13.1219	27.2625	23.4984	29.8978	1.27233	0.347475	0.594205	0.696349
ENSMUST00000149539.1	Ddx58	Ddx58-210	chr4:40227059-40239825	-	processed_transcript	102.539	52.6751	72.7232	93.0261	118.412	51.5898	75.979	87.6758	1.15395	0.206578	0.655045	0.750197
ENSMUST00000127150.7	Zeb2os	Zeb2os-201	chr2:45111138-45114087	+	antisense_RNA	49.4629	17.4907	35.3194	26.2826	58.7978	28.5463	34.091	37.8756	1.11101	0.151878	0.799997	0.86193
ENSMUST00000126942.1	Nufip2	Nufip2-202	chr11:77687459-77691920	+	processed_transcript	36.3307	45.901	48.47	61.3965	43.9891	43.1904	43.5672	49.5253	1.13676	0.184923	0.442319	0.563725
ENSMUST00000136301.1	Dhx32	Dhx32-206	chr7:133723044-133730900	-	processed_transcript	131.758	313.666	136.814	170.073	347.181	138.082	194.079	218.445	1.12555	0.170627	0.796372	0.858759
ENSMUST00000147096.1	Phpt1	Phpt1-202	chr2:25573502-25574878	-	processed_transcript	402.896	416.802	459.407	400.363	536.487	515.122	426.368	483.99	1.13515	0.182879	0.274598	0.404156
ENSMUST00000129183.1	Zfp593	Zfp593-202	chr4:134243307-134245542	-	processed_transcript	8.2964	35.2758	62.9763	48.1246	8.15423	67.2784	35.5162	41.1858	1.15963	0.213669	0.821259	0.878824
ENSMUST00000139040.1	Vmp1	Vmp1-204	chr11:86664554-86683821	-	processed_transcript	11.4302	28.3861	53.9198	46.1786	33.1664	16.3433	31.2454	31.8961	1.02083	0.0297357	0.967627	0.976935
ENSMUST00000195082.1	Gm36569	Gm36569-201	chr3:79859293-79886806	-	antisense_RNA	26.7538	31.5967	30.1793	29.6071	36.1701	34.0836	29.5099	33.2869	1.12799	0.173755	0.192332	0.311966
ENSMUST00000153370.1	Card9	Card9-203	chr2:26352187-26352775	-	processed_transcript	57.6944	11.439	42.3035	28.8372	31.0238	44.5311	37.1456	34.7974	0.936782	-0.0942152	0.878849	0.918217
ENSMUST00000204270.2	Zyx	Zyx-210	chr6:42353478-42356037	+	processed_transcript	197.405	133.56	121.058	212.278	73.5568	290.575	150.674	192.137	1.27518	0.350697	0.573426	0.679107
ENSMUST00000186280.1	Bivm	Bivm-206	chr1:44119508-44126347	+	processed_transcript	41.4968	52.588	63.3563	38.462	78.8439	64.7526	52.4803	60.6862	1.15636	0.20959	0.573685	0.679254
ENSMUST00000154639.1	Decr1	Decr1-203	chr4:15943691-15944489	-	processed_transcript	141.803	102.907	1	19.457	18.6753	56.9884	81.9035	31.7069	0.387125	-1.36913	0.316099	0.449353
ENSMUST00000142373.1	Gm11899	Gm11899-201	chr4:24792680-24800310	+	antisense_RNA	81.5544	95.191	105.557	71.4627	129.534	125.485	94.1008	108.827	1.15649	0.209759	0.501733	0.61502
ENSMUST00000142768.7	Atp5g3	Atp5g3-204	chr2:73908731-73911282	-	processed_transcript	389.628	368.262	530.286	612.959	211.914	830.285	429.392	551.719	1.28488	0.361638	0.550966	0.656986
ENSMUST00000153340.1	Arap1	Arap1-216	chr7:101395849-101398358	+	processed_transcript	24.2541	16.8795	34.1732	18.3015	41.7211	25.9	25.1023	28.6409	1.14097	0.190257	0.6994	0.784237
ENSMUST00000166109.7	Eci2	Eci2-206	chr13:34978702-34988822	-	processed_transcript	357.418	288.468	329.707	151.037	988.471	321.445	325.198	486.984	1.4975	0.582558	0.562168	0.668445
ENSMUST00000202593.1	Preb	Preb-211	chr5:30959361-30960262	-	processed_transcript	118.065	105.15	57.4075	84.0602	146.572	81.2894	93.5407	103.974	1.11154	0.152555	0.730056	0.806761
ENSMUST00000132600.1	Tcp11l1	Tcp11l1-206	chr2:104704950-104712166	-	processed_transcript	155.665	145.137	93.2364	83.2009	176.664	201.388	131.346	153.751	1.17058	0.227225	0.612425	0.713552
ENSMUST00000123862.7	Dhrs7c	Dhrs7c-201	chr11:67798187-67800810	+	processed_transcript	89.38	21.1944	48.9655	60.744	65.1482	32.8105	53.1799	52.9009	0.994752	-0.00759071	0.990587	0.993348
ENSMUST00000211382.1	Gm45670	Gm45670-201	chr7:133747624-133753038	+	antisense_RNA	2113.77	1982.87	2052.03	2126.38	2858.19	1979.41	2049.56	2321.33	1.1326	0.179638	0.378004	0.50689
ENSMUST00000148520.1	Faap100	Faap100-205	chr11:120376170-120378709	-	processed_transcript	49.1652	44.1621	61.0637	21.9562	85.2283	98.9024	51.4637	68.6956	1.33484	0.416664	0.516164	0.627215
ENSMUST00000207512.1	Gm30873	Gm30873-201	chr7:84338095-84347869	+	antisense_RNA	25.2011	21.8575	12.9405	10.284	36.6844	26.3167	19.9997	24.4284	1.22143	0.288576	0.630129	0.728618
ENSMUST00000123488.7	Minos1	Minos1-202	chr4:139103823-139111243	-	processed_transcript	41.0198	131.881	48.3234	56.2458	94.5105	68.1116	73.7415	72.956	0.989348	-0.0154502	0.981158	0.986248
ENSMUST00000203808.1	Zfp638	Zfp638-211	chr6:83914397-83943033	+	processed_transcript	16.5909	34.0784	18.978	32.3384	22.4317	20.482	23.2158	25.084	1.08047	0.111665	0.790904	0.85561
ENSMUST00000174530.1	Gm21989	Gm21989-201	chr12:20990459-21200919	+	processed_transcript	24.5961	25.9523	23.8005	32.1048	21.1953	30.853	24.783	28.051	1.13186	0.178701	0.403754	0.529027
ENSMUST00000145278.1	Wbp2	Wbp2-204	chr11:116079397-116081485	-	processed_transcript	61.789	32.7772	41.0262	21.039	57.7013	94.5052	45.1975	57.7485	1.27769	0.353542	0.612739	0.713753
ENSMUST00000149822.1	Snhg20	Snhg20-202	chr11:117076790-117078955	+	lincRNA	278.549	272.457	207.913	253.914	283.688	302.358	252.973	279.987	1.10678	0.146375	0.367915	0.501911
ENSMUST00000150648.1	Txndc16	Txndc16-208	chr14:45213294-45219364	-	processed_transcript	52.6653	69.9714	1.1034	12.3296	18.2631	24.8026	41.2467	18.4651	0.447675	-1.15948	0.33891	0.471925
ENSMUST00000147692.1	Kmt5a	Kmt5a-208	chr5:124447005-124450784	+	processed_transcript	93.9324	76.4792	75.3996	89.7421	113.213	73.0929	81.9371	92.0159	1.12301	0.167367	0.484447	0.599519
ENSMUST00000146309.7	Aldh4a1	Aldh4a1-203	chr4:139622894-139649687	+	processed_transcript	145.17	92.4987	75.3742	123.115	122.991	91.4344	104.348	112.513	1.07825	0.108698	0.745721	0.81922
ENSMUST00000154925.1	Srebf1	Srebf1-211	chr11:60201801-60203857	-	processed_transcript	38.206	56.0559	15.2652	5.19565	53.743	160.1	36.509	73.013	1.99986	0.9999	0.482823	0.598097
ENSMUST00000128422.7	Dmpk	Dmpk-206	chr7:19087611-19091767	+	processed_transcript	27.8946	48.9453	24.9785	22.0655	41.6068	50.759	33.9395	38.1437	1.12388	0.168482	0.72964	0.806655
ENSMUST00000142052.7	Stk16	Stk16-207	chr1:75210880-75213137	+	processed_transcript	518.833	1	1	1	1	707.327	173.611	236.442	1.36191	0.44563	0.840123	0.892376
ENSMUST00000226952.1	Fbxl3	Fbxl3-207	chr14:103083360-103099506	-	processed_transcript	60.8692	110.848	59.381	49.0209	68.577	162.358	77.0328	93.3187	1.21142	0.276694	0.696623	0.781994
ENSMUST00000208509.1	2310057M21Rik	2310057M21Rik-205	chr7:131361783-131362710	-	processed_transcript	51.7274	28.1649	19.8677	32.6046	33.2104	36.3331	33.2534	34.0494	1.02394	0.0341283	0.937979	0.957362
ENSMUST00000137741.1	Ptpa	Ptpa-211	chr2:30443219-30446899	+	processed_transcript	43.4116	40.6488	93.1394	49.6245	96.034	46.8619	59.0666	64.1734	1.08646	0.119634	0.837593	0.891003
ENSMUST00000125980.1	Fbf1	Fbf1-204	chr11:116143242-116150795	-	processed_transcript	32.7691	19.3876	25.3533	37.6591	26.6006	21.8044	25.8367	28.688	1.11036	0.151029	0.663719	0.756691
ENSMUST00000122932.7	Eef1g	Eef1g-202	chr19:8967570-8972584	+	processed_transcript	17.8097	17.9536	23.1565	11.7875	35.922	23.6952	19.6399	23.8016	1.2119	0.277268	0.593536	0.695727
ENSMUST00000155305.1	Chid1	Chid1-208	chr7:141511775-141526467	-	processed_transcript	23.2228	53.8965	10.9242	10.3673	48.4542	36.7894	29.3478	31.8703	1.08595	0.118958	0.88945	0.92469
ENSMUST00000130683.1	Kcnd3os	Kcnd3os-201	chr3:105448189-105452955	-	antisense_RNA	34.3049	33.9286	29.7461	33.0671	25.6307	55.0535	32.6599	37.9171	1.16097	0.215329	0.588614	0.692535
ENSMUST00000186165.1	2300009A05Rik	2300009A05Rik-203	chr9:63394447-63398827	-	processed_transcript	17.2349	7.84848	94.8459	15.7586	22.9357	47.7582	39.9764	28.8175	0.720863	-0.472204	0.72199	0.801186
ENSMUST00000155652.1	Adgrl4	Adgrl4-204	chr3:151438274-151497944	+	processed_transcript	42.6808	56.6937	62.2693	69.362	101.165	28.8711	53.8813	66.4659	1.23356	0.30283	0.593316	0.695793
ENSMUST00000210341.1	Fam160a2	Fam160a2-209	chr7:105390221-105399986	-	processed_transcript	38.8605	24.6323	14.4154	28.7476	12.0218	53.5448	25.9694	31.4381	1.21058	0.275699	0.715809	0.796081
ENSMUST00000139511.7	H2afy	H2afy-204	chr13:56095556-56135530	-	processed_transcript	493.164	594.36	496.248	700.705	560.617	496.11	527.924	585.811	1.10965	0.150104	0.448282	0.567591
ENSMUST00000156649.1	Wbp1l	Wbp1l-205	chr19:46623401-46652522	+	processed_transcript	98.5506	108.329	80.8624	82.4408	171.765	81.6635	95.9142	111.957	1.16726	0.223123	0.631756	0.729662
ENSMUST00000148023.2	Nipal3	Nipal3-206	chr4:135452267-135455335	-	processed_transcript	7.68139	17.4578	10.37	32.3282	1	57.5074	11.8364	30.2785	2.55808	1.35506	0.328923	0.46301
ENSMUST00000202496.1	Wdr1	Wdr1-210	chr5:38529968-38531996	-	processed_transcript	41.1059	47.1134	12.7632	17.7986	44.8416	41.3163	33.6608	34.6522	1.02945	0.0418755	0.945283	0.961505
ENSMUST00000136656.7	Znhit3	Znhit3-203	chr11:84911469-84916366	-	processed_transcript	34.3269	25.0238	7.21253	24.3299	43.1784	7.85332	22.1878	25.1206	1.13218	0.179104	0.8318	0.886901
ENSMUST00000151401.8	Tmem134	Tmem134-213	chr19:4125975-4131727	+	processed_transcript	38.4996	13.1283	20.1821	19.2747	34.3374	20.4902	23.9367	24.7008	1.03192	0.0453356	0.936223	0.956345
ENSMUST00000151217.7	1110018N20Rik	1110018N20Rik-203	chr2:167188702-167192259	+	processed_transcript	47.8665	20.3228	54.0722	51.9119	48.195	27.902	40.7538	42.6696	1.04701	0.0662745	0.888062	0.924201
ENSMUST00000139277.7	Atp5o	Atp5o-203	chr16:91925313-91931274	-	processed_transcript	4847.24	5313.69	2898.39	4912.54	6579.53	3061.74	4353.11	4851.27	1.11444	0.156317	0.712048	0.793299
ENSMUST00000142190.1	Cacna1g	Cacna1g-214	chr11:94418847-94424343	-	processed_transcript	44.7714	20.9184	19.0978	16.9554	28.5051	49.0002	28.2626	31.4869	1.11408	0.155857	0.809153	0.868636
ENSMUST00000177301.1	Cct8	Cct8-208	chr16:87488845-87491448	-	processed_transcript	3.75902	21.4552	13.9491	66.4869	22.251	1	13.0544	29.9126	2.29137	1.19621	0.445864	0.566808
ENSMUST00000219104.1	Frs2	Frs2-203	chr10:117101667-117148534	-	processed_transcript	70.481	23.0609	65.0703	46.9988	32.028	92.2025	52.8707	57.0764	1.07955	0.110426	0.866602	0.909192
ENSMUST00000224148.1	AV026068	AV026068-219	chr8:57304265-57320394	-	antisense_RNA	69.1455	85.9939	81.629	93.2316	77.5117	87.8284	78.9228	86.1906	1.09209	0.127088	0.34772	0.480739
ENSMUST00000151879.1	Hmgcl	Hmgcl-205	chr4:135948530-135958749	+	processed_transcript	46.9545	58.8883	63.8679	59.4162	28.0748	137.552	56.5702	75.0142	1.32604	0.407121	0.605358	0.707116
ENSMUST00000138946.1	Scube2	Scube2-205	chr7:109800650-109808231	-	processed_transcript	502.656	580.972	629.272	612.989	655.415	593.878	570.966	620.761	1.08721	0.120631	0.292667	0.423694
ENSMUST00000209390.1	Trak1	Trak1-204	chr9:121297829-121364107	+	processed_transcript	162.359	244.406	136.157	142.752	180.734	271.153	180.974	198.213	1.09526	0.131268	0.748271	0.820947
ENSMUST00000152907.1	H6pd	H6pd-203	chr4:149999776-150001290	-	processed_transcript	38.254	25.3716	62.5365	55.0114	30.55	46.6022	42.0541	44.0545	1.04757	0.0670441	0.885557	0.922356
ENSMUST00000134362.7	Pdk1	Pdk1-204	chr2:71873326-71886312	+	processed_transcript	53.0565	221.651	38.032	235.799	490.087	4.98943	104.247	243.625	2.33701	1.22466	0.410917	0.535904
ENSMUST00000146365.1	Kat7	Kat7-209	chr11:95301530-95310208	-	processed_transcript	26.3151	25.1889	16.9633	31.3737	20.143	22.9301	22.8224	24.8156	1.08734	0.120797	0.679524	0.767933
ENSMUST00000145986.1	Add1	Add1-210	chr5:34573804-34601625	+	processed_transcript	438.314	83.2312	95.2023	170.221	200.771	130.602	205.582	167.198	0.81329	-0.298159	0.761604	0.832493
ENSMUST00000152551.1	1110008F13Rik	1110008F13Rik-203	chr2:156863139-156873398	+	processed_transcript	77.6604	18.4395	38.8221	34.7303	41.1516	49.869	44.974	41.917	0.932027	-0.101557	0.872793	0.913405
ENSMUST00000128116.1	Mecr	Mecr-203	chr4:131853745-131858171	+	processed_transcript	141.226	147.725	199.201	120.861	262.927	167.476	162.717	183.755	1.12929	0.175416	0.668888	0.761206
ENSMUST00000144639.1	Txnip	Txnip-204	chr3:96559723-96561858	+	processed_transcript	70.2482	132.699	82.5754	73.1735	196.109	68.5412	95.1741	112.608	1.18318	0.242667	0.723556	0.802393
ENSMUST00000151056.7	Coasy	Coasy-203	chr11:101082618-101085620	+	processed_transcript	28.6347	31.5034	37.4084	39.5992	35.0613	31.0338	32.5155	35.2314	1.08353	0.115734	0.48993	0.604523
ENSMUST00000134106.1	Mfsd11	Mfsd11-206	chr11:116868368-116873837	+	processed_transcript	4.9696	31.2432	34.7197	3.83723	53.8467	33.2575	23.6442	30.3138	1.28208	0.358491	0.719242	0.799369
ENSMUST00000219041.1	Smc6	Smc6-210	chr12:11266130-11270795	+	processed_transcript	27.0024	1	33.4701	1	30.0931	38.2722	20.4908	23.1218	1.1284	0.174273	0.869683	0.911096
ENSMUST00000139400.1	Ndufs3	Ndufs3-203	chr2:90894750-90898938	-	processed_transcript	136.67	145.852	179.708	135.906	253.436	132.49	154.077	173.944	1.12894	0.174972	0.659793	0.753921
ENSMUST00000143809.1	Optn	Optn-204	chr2:5046157-5064051	-	processed_transcript	85.4744	84.6972	61.7264	32.5817	161.714	107.963	77.2993	100.753	1.30341	0.38229	0.572946	0.678698
ENSMUST00000123333.7	Rnf44	Rnf44-203	chr13:54684030-54687253	-	processed_transcript	36.5798	62.0643	57.2408	55.7937	40.6029	72.8642	51.9616	56.4203	1.08581	0.118766	0.732489	0.807678
ENSMUST00000132292.1	Jak1	Jak1-203	chr4:101181912-101265223	-	processed_transcript	39.2553	24.4059	20.0568	32.2832	22.3209	33.7635	27.906	29.4559	1.05554	0.0779791	0.83168	0.886961
ENSMUST00000172017.1	Aen	Aen-206	chr7:78895951-78899699	+	processed_transcript	120.768	34.6198	136.59	74.1931	104.58	92.935	97.326	90.5693	0.930576	-0.103804	0.847296	0.896781
ENSMUST00000155386.1	Atxn7l1	Atxn7l1-214	chr12:33314400-33326063	+	processed_transcript	34.6534	20.0901	50.5323	40.7634	27.9125	38.7926	35.0919	35.8228	1.02083	0.0297387	0.943301	0.960459
ENSMUST00000124172.1	Paxx	Paxx-203	chr2:25459561-25460965	-	processed_transcript	48.2163	44.5818	48.4152	57.4643	47.2279	48.0472	47.0711	50.9131	1.08162	0.113196	0.33549	0.469499
ENSMUST00000113407.9	Gm7609	Gm7609-202	chr1:85199613-85213200	+	processed_transcript	38.9665	55.6475	48.5605	34.2776	48.5456	79.2554	47.7248	54.0262	1.13204	0.178919	0.678555	0.767698
ENSMUST00000153868.1	Ubr1	Ubr1-206	chr2:120862573-120871526	-	processed_transcript	19.4858	32.1413	34.3921	72.9361	8.57082	43.0645	28.6731	41.5238	1.44818	0.534243	0.539277	0.64703
ENSMUST00000125357.1	Rer1	Rer1-202	chr4:155082688-155086382	-	processed_transcript	60.9357	41.74	27.6879	30.4438	63.5843	45.4178	43.4545	46.482	1.06967	0.0971653	0.834615	0.888962
ENSMUST00000219079.1	F420014N23Rik	F420014N23Rik-202	chr10:127195249-127200750	+	lincRNA	33.1196	42.8084	31.0646	29.4023	48.4704	38.4966	35.6642	38.7898	1.08764	0.121199	0.660043	0.754036
ENSMUST00000204861.2	Creb5	Creb5-211	chr6:53287318-53288707	+	processed_transcript	59.2326	57.2322	56.9697	50.3775	97.5618	48.8759	57.8115	65.6051	1.13481	0.182451	0.651681	0.747024
ENSMUST00000135283.1	Slc4a4	Slc4a4-205	chr5:88887261-88888286	+	processed_transcript	13.4322	29.8169	15.0037	25.8137	9.39397	30.7817	19.4176	21.9964	1.13281	0.179905	0.771726	0.840821
ENSMUST00000154122.1	Ndufaf6	Ndufaf6-207	chr4:11062052-11076183	-	processed_transcript	213.995	187.157	50.5501	148.243	160.08	105.967	150.567	138.096	0.917174	-0.124733	0.826184	0.883156
ENSMUST00000150409.1	Slc45a4	Slc45a4-206	chr15:73605948-73645345	-	processed_transcript	69.9145	52.9881	48.0251	59.0361	42.9778	86.6076	56.9759	62.8738	1.10352	0.142108	0.702332	0.785602
ENSMUST00000159959.1	Hr	Hr-202	chr14:70552212-70554719	+	processed_transcript	141.527	79.6251	126.29	103.772	172.827	97.6995	115.814	124.766	1.0773	0.107422	0.783387	0.850949
ENSMUST00000174465.1	Egfl7	Egfl7-217	chr2:26592023-26592681	+	processed_transcript	57.6279	59.9322	80.852	67.8771	57.7726	87.5594	66.1373	71.0697	1.07458	0.103769	0.688782	0.776305
ENSMUST00000128733.1	Rpl11	Rpl11-203	chr4:136051241-136053428	-	processed_transcript	220.319	176.695	235.754	233.414	210.994	229.104	210.923	224.504	1.06439	0.0900269	0.513629	0.624737
ENSMUST00000150330.7	Necap2	Necap2-209	chr4:141070082-141078357	-	processed_transcript	36.3858	42.7425	18.3835	22.2916	49.995	31.2118	32.5039	34.4995	1.06139	0.0859595	0.864241	0.90766
ENSMUST00000152926.1	1700021F05Rik	1700021F05Rik-203	chr10:43525159-43525843	-	processed_transcript	37.0002	17.3266	12.8219	19.5525	47.3226	10.7824	22.3829	25.8858	1.1565	0.209765	0.805009	0.865849
ENSMUST00000155539.1	Rrbp1	Rrbp1-208	chr2:143956383-143957645	-	processed_transcript	64.2969	35.9258	33.6125	52.2174	32.0795	56.2302	44.6117	46.8423	1.05	0.0703912	0.865721	0.908646
ENSMUST00000134361.7	Haus8	Haus8-206	chr8:71256065-71272478	-	processed_transcript	106.696	90.0622	76.2777	84.8826	180.07	58.1739	91.0119	107.709	1.18346	0.24301	0.683255	0.771629
ENSMUST00000223632.1	AC163038.1	AC163038.1-201	chr13:58155141-58157575	-	bidirectional_promoter_lncRNA	26.765	22.8253	19.8785	16.6993	37.6554	23.426	23.1563	25.9269	1.11965	0.163047	0.691487	0.778135
ENSMUST00000182488.1	AC167978.1	AC167978.1-201	chr7:30734739-30756126	+	processed_transcript	24.2152	33.4054	29.3088	19.7615	31.7818	45.7633	28.9765	32.4355	1.11937	0.162693	0.68665	0.774248
ENSMUST00000148771.1	Limk2	Limk2-213	chr11:3350392-3352817	-	processed_transcript	48.9523	28.5026	61.1166	38.1905	56.3715	47.8172	46.1905	47.4598	1.02748	0.0391091	0.912659	0.939321
ENSMUST00000156069.1	Prdm16	Prdm16-213	chr4:154328260-154334922	-	processed_transcript	45.5345	34.012	30.6986	42.5249	19.6906	68.3342	36.7484	43.5166	1.18418	0.243885	0.670216	0.762373
ENSMUST00000156348.7	Ppp1r12b	Ppp1r12b-208	chr1:134759067-134846420	-	processed_transcript	22.3814	30.6444	31.9754	30.7199	34.2916	25.034	28.3337	30.0152	1.05934	0.0831708	0.698197	0.783236
ENSMUST00000140564.7	Tsfm	Tsfm-205	chr10:127022626-127030391	-	processed_transcript	23.7974	4.11028	16.3501	1	81.3247	23.6447	14.7526	35.3231	2.39437	1.25964	0.449928	0.568817
ENSMUST00000180530.1	A330094K24Rik	A330094K24Rik-201	chr18:77729681-77733470	-	lincRNA	59.2543	63.6971	82.5821	61.6428	76.8694	79.074	68.5112	72.5287	1.05864	0.0822134	0.678729	0.767551
ENSMUST00000143986.1	Tmem101	Tmem101-203	chr11:102154174-102156347	-	processed_transcript	21.5831	40.7322	8.35439	30.7101	26.0251	10.9961	23.5566	22.5771	0.958421	-0.0612688	0.934056	0.954905
ENSMUST00000123212.1	Phf2os1	Phf2os1-201	chr13:48871112-48875460	+	antisense_RNA	18.3755	16.8747	37.2991	17.8358	20.2561	38.2535	24.1831	25.4485	1.05232	0.0735792	0.897271	0.928987
ENSMUST00000126913.7	Coq6	Coq6-205	chr12:84368426-84373792	+	processed_transcript	47.7105	104.503	68.2769	122.746	44.1968	74.9263	73.4967	80.6229	1.09696	0.13351	0.813254	0.871924
ENSMUST00000145047.1	Myadml2	Myadml2-202	chr11:120646032-120647082	-	processed_transcript	262.989	303.92	212.744	214.925	407.499	231.738	259.884	284.721	1.09557	0.131679	0.729613	0.806802
ENSMUST00000177315.7	Rhot2	Rhot2-215	chr17:25842382-25844542	-	processed_transcript	43.7487	43.9485	59.7516	55.7068	57.3352	42.9073	49.1496	51.9831	1.05765	0.0808627	0.706116	0.787909
ENSMUST00000129760.7	Bend5	Bend5-203	chr4:111415088-111459920	+	processed_transcript	117.626	176.345	137.293	125.275	238.523	113.24	143.755	159.012	1.10614	0.145528	0.743346	0.816967
ENSMUST00000126022.7	Mdm2	Mdm2-203	chr10:117696041-117710711	-	processed_transcript	35.6111	48.7687	22.5364	39.4397	38.0488	30.9481	35.6387	36.1455	1.01422	0.0203723	0.952621	0.966627
ENSMUST00000206980.1	Fbrs	Fbrs-209	chr7:127480015-127483221	+	processed_transcript	12.1855	36.2729	18.4695	13.6461	41.5877	17.0311	22.3093	24.0883	1.07974	0.110688	0.883367	0.921218
ENSMUST00000159618.1	4732440D04Rik	4732440D04Rik-202	chr1:6213293-6214590	-	antisense_RNA	39.3529	9.57121	31.46	18.3411	23.8621	32.0007	26.7947	24.7346	0.923116	-0.115416	0.843014	0.894127
ENSMUST00000147135.1	Acss1	Acss1-204	chr2:150628582-150638113	-	processed_transcript	30.0722	50.6893	27.7428	36.4584	31.1108	44.0278	36.1681	37.199	1.0285	0.0405466	0.905997	0.934948
ENSMUST00000222087.1	Ifi30	Ifi30-202	chr8:70762774-70766663	-	processed_transcript	568.115	592.607	500.188	443.634	540.408	826.452	553.637	603.498	1.09006	0.124409	0.694832	0.780505
ENSMUST00000151422.1	Tdrd7	Tdrd7-204	chr4:45972834-45987622	+	processed_transcript	43.8276	19.2843	19.0135	13.5516	35.8528	38.8769	27.3752	29.4271	1.07496	0.104277	0.86666	0.909063
ENSMUST00000150262.7	Tpm2	Tpm2-205	chr4:43514711-43523438	-	processed_transcript	123.973	48.095	102.877	107.984	47.5593	140.067	91.6482	98.5367	1.07516	0.104554	0.854833	0.901727
ENSMUST00000112995.2	Tsc22d3	Tsc22d3-202	chrX:140539528-140542668	-	processed_transcript	180.247	124.292	200.45	387.084	83.6388	162.625	168.33	211.116	1.25418	0.326744	0.671638	0.763645
ENSMUST00000173523.1	Malat1	Malat1-204	chr19:5801943-5802640	-	lincRNA	28.0335	25.6826	39.1595	27.1317	26.4075	46.0885	30.9585	33.2092	1.0727	0.101248	0.783704	0.85111
ENSMUST00000172501.7	1110038B12Rik	1110038B12Rik-201	chr17:34950243-34952468	-	lincRNA	199.754	66.6736	130.17	122.083	162.687	102.184	132.199	128.985	0.975683	-0.0355149	0.943144	0.960687
ENSMUST00000137007.1	Upp2	Upp2-206	chr2:58567318-58583782	+	processed_transcript	148.574	140.97	132.647	151.778	135.258	158.328	140.73	148.455	1.05489	0.077093	0.402748	0.528121
ENSMUST00000141767.1	Samd4	Samd4-208	chr14:46883506-46884646	+	processed_transcript	29.5804	15.473	44.0425	23.0261	22.6545	45.0941	29.6986	30.2582	1.01884	0.026932	0.962185	0.973
ENSMUST00000142359.1	Ssrp1	Ssrp1-206	chr2:85041174-85042309	+	processed_transcript	32.6413	3.68716	16.2856	2.00277	20.6573	55.2513	17.538	25.9705	1.48081	0.566386	0.658791	0.753117
ENSMUST00000174399.7	H2-Ke6	H2-Ke6-208	chr17:34026408-34027863	-	processed_transcript	39.0536	65.9606	49.5687	46.6982	71.6905	44.3861	51.5276	54.2583	1.05299	0.0744973	0.82742	0.884102
ENSMUST00000134356.1	Cmc2	Cmc2-204	chr8:116889615-116921446	-	processed_transcript	42.0564	91.8517	71.1332	50.2144	101.454	62.7075	68.3471	71.4587	1.04553	0.0642291	0.890056	0.924748
ENSMUST00000146118.1	Plaa	Plaa-206	chr4:94589687-94603181	-	processed_transcript	24.8895	34.1184	46.1753	32.837	51.0889	27.1159	35.0611	37.0139	1.0557	0.0781976	0.847157	0.896822
ENSMUST00000155071.7	Rps10	Rps10-207	chr17:27631030-27635276	-	processed_transcript	244.992	247.461	365.132	145.382	652.445	270.635	285.862	356.154	1.2459	0.317183	0.678593	0.767569
ENSMUST00000141520.1	Tbc1d9b	Tbc1d9b-206	chr11:50161663-50164095	+	processed_transcript	41.4139	29.5913	17.7815	17.9914	39.6721	35.3929	29.5956	31.0188	1.04809	0.0677611	0.888313	0.92408
ENSMUST00000148139.1	Sirt4	Sirt4-205	chr5:115480231-115484345	-	processed_transcript	51.9266	42.1863	73.1039	54.8545	71.5313	47.1473	55.739	57.8444	1.03777	0.0534901	0.865056	0.908137
ENSMUST00000124418.1	Anapc1	Anapc1-205	chr2:128615403-128618142	-	processed_transcript	76.0994	43.2204	51.3656	35.8568	89.1521	60.9405	56.8951	61.9832	1.08943	0.123571	0.79471	0.857885
ENSMUST00000156155.1	Brd1	Brd1-206	chr15:88712900-88719155	-	processed_transcript	23.2542	17.2386	45.0367	31.867	25.134	25.9663	28.5098	27.6558	0.970044	-0.0438774	0.926573	0.948603
ENSMUST00000145546.1	Rexo4	Rexo4-209	chr2:26954428-26955684	-	processed_transcript	26.6208	148.796	7.81694	41.9747	70.6297	12.0205	61.078	41.5416	0.680141	-0.556095	0.700896	0.784866
ENSMUST00000143220.1	Mllt6	Mllt6-204	chr11:97676052-97678370	+	processed_transcript	23.7864	39.316	35.6648	43.5756	48.6071	18.1234	32.9224	36.7687	1.11683	0.159409	0.733538	0.808481
ENSMUST00000141750.7	Caprin1	Caprin1-207	chr2:103777963-103796933	-	processed_transcript	96.5802	93.85	7.58132	25.0464	264.057	11.9521	66.0038	100.352	1.52039	0.604444	0.713118	0.794315
ENSMUST00000211938.1	Tom1	Tom1-204	chr8:75054352-75058863	+	processed_transcript	34.7273	28.7805	27.1687	33.0307	24.6518	38.2824	30.2255	31.9883	1.05832	0.0817769	0.720294	0.800009
ENSMUST00000138857.1	Zfp597	Zfp597-204	chr16:3862384-3884505	-	processed_transcript	30.18	30.9581	31.9837	17.62	46.8497	41.5504	31.0406	35.34	1.13851	0.187147	0.658005	0.75239
ENSMUST00000174412.7	4930481A15Rik	4930481A15Rik-203	chr19:5406815-5417683	+	antisense_RNA	29.097	60.2749	28.5021	23.0201	43.0893	57.7646	39.2914	41.2913	1.0509	0.0716274	0.897266	0.929173
ENSMUST00000135911.7	Rps6kb2	Rps6kb2-206	chr19:4156986-4162330	-	processed_transcript	42.1731	8.85452	11.2239	3.64936	17.6474	74.5955	20.7505	31.9641	1.5404	0.623305	0.667253	0.760032
ENSMUST00000163282.7	Cox16	Cox16-203	chr12:81472095-81484851	-	processed_transcript	17.8852	58.3562	73.498	41.2347	32.9725	64.6607	49.9131	46.2893	0.927398	-0.10874	0.858915	0.904329
ENSMUST00000125618.1	Mbd3	Mbd3-205	chr10:80393895-80395326	-	processed_transcript	20.1554	35.9638	25.2525	20.3744	34.3922	29.7769	27.1239	28.1812	1.03898	0.0551672	0.873316	0.913762
ENSMUST00000223007.1	2010111I01Rik	2010111I01Rik-225	chr13:63273258-63302196	+	processed_transcript	595.133	302.98	189.397	286.276	427.291	318.139	362.503	343.902	0.948687	-0.0759966	0.891627	0.925807
ENSMUST00000152323.1	Agtrap	Agtrap-203	chr4:148080517-148084776	-	processed_transcript	17.4987	14.0952	30.7338	12.9801	18.0768	36.7823	20.7759	22.613	1.08843	0.122244	0.845488	0.89562
ENSMUST00000150491.1	Spns2	Spns2-206	chr11:72452608-72456350	-	processed_transcript	26.7057	41.5035	35.0699	25.2085	38.1206	45.9254	34.4264	36.4182	1.05786	0.0811447	0.801262	0.862739
ENSMUST00000124916.1	Ccl12	Ccl12-202	chr11:82101852-82103367	+	processed_transcript	47.6919	1	36.8691	1	26.1068	76.1816	28.5203	34.4295	1.20719	0.271653	0.832734	0.887522
ENSMUST00000148795.1	Nmt1	Nmt1-203	chr11:103028585-103057484	+	processed_transcript	9.50682	47.6708	25.435	20.5473	54.5383	11.6073	27.5375	28.8976	1.04939	0.0695509	0.940536	0.959001
ENSMUST00000146898.1	Ubac1	Ubac1-206	chr2:26014912-26021566	-	processed_transcript	12.9351	24.5873	7.41854	1	35.8297	74.1885	14.9803	37.006	2.47032	1.3047	0.368162	0.502111
ENSMUST00000139583.7	Ddx58	Ddx58-207	chr4:40223431-40239755	-	processed_transcript	257.853	27.4118	31.5198	46.5709	48.5612	110.074	105.595	68.4021	0.64778	-0.626425	0.662079	0.755334
ENSMUST00000142477.1	Flt1	Flt1-205	chr5:147614756-147615242	-	processed_transcript	46.0893	18.0763	48.584	38.7036	30.5261	38.2333	37.5832	35.821	0.953111	-0.0692835	0.870382	0.911639
ENSMUST00000153064.1	Gpsm1	Gpsm1-213	chr2:26326034-26339920	+	processed_transcript	112.321	84.2459	70.7269	95.7726	69.37	112.324	89.098	92.4888	1.03806	0.0538844	0.855868	0.902253
ENSMUST00000134508.1	Ncoa6	Ncoa6-205	chr2:155438010-155473824	-	processed_transcript	200.451	260.937	173.653	163.064	245.441	251.675	211.68	220.06	1.03959	0.0560115	0.838321	0.891214
ENSMUST00000129104.1	Fbxw5	Fbxw5-205	chr2:25502558-25503584	+	processed_transcript	41.8427	42.7204	24.9877	27.5623	48.2497	37.2186	36.5169	37.6769	1.03176	0.0451134	0.895702	0.928317
ENSMUST00000172178.1	A230065N10Rik	A230065N10Rik-201	chr7:89632097-89633124	-	antisense_RNA	48.7524	43.6582	30.7521	34.8027	38.3968	54.2232	41.0542	42.4742	1.03459	0.0490569	0.868028	0.909931
ENSMUST00000180979.1	Fbxo31	Fbxo31-203	chr8:121553999-121559099	-	processed_transcript	32.6237	24.4828	18.8363	42.1072	26.223	15.0174	25.3143	27.7825	1.09751	0.134228	0.793448	0.857257
ENSMUST00000180839.1	Gm17276	Gm17276-201	chr17:32113429-32141839	+	lincRNA	21.1253	29.9759	26.0389	30.6848	19.0718	31.0542	25.7134	26.9369	1.04758	0.0670671	0.807207	0.867657
ENSMUST00000228504.1	Ubr5	Ubr5-213	chr15:38006505-38011816	-	processed_transcript	71.2426	124.786	90.3944	116.567	60.5377	125.471	95.4745	100.858	1.05639	0.0791438	0.844062	0.894673
ENSMUST00000168493.1	Coro1c	Coro1c-208	chr5:113848612-113858774	-	processed_transcript	20.2392	21.0829	12.0364	6.0982	38.7929	23.9096	17.7862	22.9336	1.2894	0.366704	0.62993	0.728722
ENSMUST00000141696.1	Gm12359	Gm12359-202	chr11:98804657-98810058	-	antisense_RNA	25.0481	32.6567	31.4029	27.3653	32.5188	31.653	29.7026	30.5124	1.02726	0.0388058	0.789944	0.855122
ENSMUST00000192086.1	Mbnl1	Mbnl1-204	chr3:60500935-60547158	+	processed_transcript	93.9054	80.6584	16.9624	33.3478	53.3737	78.9985	63.8421	55.24	0.86526	-0.208794	0.767437	0.838142
ENSMUST00000174241.7	Lsm2	Lsm2-208	chr17:34981911-34985671	+	processed_transcript	18.6594	37.8122	16.3918	6.65449	28.1756	67.5034	24.2878	34.1112	1.40446	0.490011	0.633559	0.731075
ENSMUST00000180923.1	1700007L15Rik	1700007L15Rik-201	chr16:33379855-33380727	-	lincRNA	108.334	76.0277	48.3636	75.7436	87.2241	65.8893	77.575	76.2857	0.98338	-0.0241794	0.94748	0.962963
ENSMUST00000147586.1	Sh3bp5	Sh3bp5-204	chr14:31377595-31407385	-	processed_transcript	58.6033	29.718	18.9019	35.7428	22.5726	44.4962	35.7411	34.2705	0.958856	-0.0606139	0.918229	0.943319
ENSMUST00000183215.7	Rian	Rian-216	chr12:109603945-109645395	+	lincRNA	18.5588	57.8646	19.5656	24.9493	33.4089	27.4165	31.9963	28.5916	0.893589	-0.162316	0.808888	0.868537
ENSMUST00000191230.6	Ilkap	Ilkap-213	chr1:91381039-91398815	-	processed_transcript	67.2336	49.5754	123.874	63.4562	62.458	113.186	80.2276	79.7002	0.993426	-0.00951613	0.985861	0.989987
ENSMUST00000203339.1	Htra2	Htra2-210	chr6:83053147-83053885	-	processed_transcript	37.1989	52.0029	92.2978	31.4874	90.4667	68.0706	60.4999	63.3415	1.04697	0.0662197	0.910722	0.938286
ENSMUST00000134522.7	Zkscan17	Zkscan17-204	chr11:59499544-59506220	-	processed_transcript	85.2117	203.356	179.007	192.222	55.2728	316.185	155.858	187.893	1.20554	0.26968	0.720802	0.800397
ENSMUST00000196729.1	Map4	Map4-207	chr9:110026119-110028121	+	processed_transcript	88.6768	74.2803	91.6859	66.0859	152.528	64.7013	84.881	94.4385	1.1126	0.153934	0.762493	0.833284
ENSMUST00000124954.1	Got1	Got1-202	chr19:43512254-43524485	-	processed_transcript	300.084	358.563	332.944	226.148	395.624	430.752	330.53	350.841	1.06145	0.086036	0.771621	0.840888
ENSMUST00000227499.1	Sdr39u1	Sdr39u1-212	chr14:55897931-55900293	-	processed_transcript	25.0131	31.3904	26.497	25.8002	18.1461	47.7593	27.6335	30.5685	1.10621	0.145627	0.762748	0.833382
ENSMUST00000159508.7	Ghr	Ghr-204	chr15:3346509-3583211	-	processed_transcript	20.4954	55.5294	36.3677	28.0228	38.3017	41.4425	37.4642	35.9223	0.958845	-0.0606303	0.894436	0.927577
ENSMUST00000123395.7	Pex10	Pex10-202	chr4:155067054-155068881	+	processed_transcript	33.1633	38.343	29.3133	81.1562	14.013	35.1777	33.6065	43.449	1.29287	0.37058	0.648273	0.744642
ENSMUST00000143243.1	Stard3	Stard3-203	chr11:98378156-98379348	+	processed_transcript	77.1188	73.0412	67.649	60.9838	60.2567	110.987	72.603	77.409	1.0662	0.0924729	0.791576	0.856153
ENSMUST00000135770.7	Rpa1	Rpa1-203	chr11:75301305-75342188	-	processed_transcript	1.64068	1	53.771	1	1	94.3009	18.8039	32.1003	1.70711	0.771556	0.728296	0.806586
ENSMUST00000137695.1	Nt5m	Nt5m-202	chr11:59848104-59876533	+	processed_transcript	147.924	213.961	151.88	134.267	178.371	213.604	171.255	175.414	1.02428	0.0346156	0.900929	0.931817
ENSMUST00000173480.7	Rps28	Rps28-204	chr17:33823050-33824465	-	processed_transcript	184.256	146.435	140.32	94.2471	238.595	178.735	157.004	170.526	1.08613	0.119192	0.77427	0.842317
ENSMUST00000123355.7	Hspb6	Hspb6-202	chr7:30552524-30555439	+	processed_transcript	438.358	482.554	606.378	400.394	622.149	546.229	509.097	522.924	1.02716	0.0386617	0.874627	0.914565
ENSMUST00000141075.7	3110040N11Rik	3110040N11Rik-202	chr7:81783031-81788664	-	processed_transcript	31.4039	73.6014	55.5389	55.5345	54.9813	44.4999	53.5147	51.6719	0.965564	-0.0505564	0.891979	0.9256
ENSMUST00000133652.1	Cops3	Cops3-205	chr11:59836638-59839812	-	processed_transcript	37.352	28.7962	24.8403	29.8622	28.4461	32.9884	30.3295	30.4322	1.00339	0.0048784	0.98039	0.985673
ENSMUST00000105097.2	Zswim6	Zswim6-201	chr13:107724618-107890064	-	processed_transcript	60.3314	31.5811	35.8293	51.7452	36.8313	37.4855	42.5806	42.0207	0.98685	-0.0190979	0.958836	0.971564
ENSMUST00000219917.1	Ctdsp2	Ctdsp2-204	chr10:126979029-126980800	+	processed_transcript	116.266	101.884	89.0135	133.775	77.0772	106.981	102.388	105.945	1.03474	0.0492686	0.854333	0.901577
ENSMUST00000151490.7	Galt	Galt-209	chr4:41755253-41757549	+	processed_transcript	35.6957	26.7771	19.6998	17.8176	45.5834	24.0804	27.3908	29.1604	1.06461	0.0903185	0.862687	0.906784
ENSMUST00000151195.7	Trpv2	Trpv2-204	chr11:62574486-62600299	+	processed_transcript	54.2797	48.4177	29.2329	54.4002	25.3666	57.4208	43.9767	45.7292	1.03985	0.0563753	0.897023	0.929113
ENSMUST00000131569.1	Tepsin	Tepsin-204	chr11:120096899-120098700	-	processed_transcript	23.856	16.2355	29.5118	32.6686	15.636	23.0188	23.2011	23.7745	1.02471	0.0352197	0.931362	0.952924
ENSMUST00000126293.1	Msi2	Msi2-204	chr11:88712188-88718212	-	processed_transcript	99.3901	182.03	117.241	155.888	132.894	105.247	132.887	131.343	0.988382	-0.0168588	0.960183	0.971756
ENSMUST00000124256.7	Fam110b	Fam110b-203	chr4:5644090-5798382	+	processed_transcript	17.4966	18.5738	19.838	27.6089	7.56007	31.7279	18.6362	22.299	1.19654	0.258873	0.650651	0.746522
ENSMUST00000131926.1	Ctnnd1	Ctnnd1-226	chr2:84608987-84612578	-	processed_transcript	37.5138	33.9302	35.1939	44.8895	45.2102	22.6134	35.546	37.571	1.05697	0.0799347	0.801862	0.863016
ENSMUST00000205762.1	1700011D18Rik	1700011D18Rik-201	chr7:78847254-78847530	+	lincRNA	17.5774	16.0613	3.86655	1	34.8492	32.024	12.5017	22.6244	1.8097	0.85575	0.434987	0.557199
ENSMUST00000181932.1	B230322F03Rik	B230322F03Rik-201	chr7:35555367-35556935	+	antisense_RNA	48.5469	58.2925	48.1031	54.8248	62.7873	40.3534	51.6475	52.6552	1.01951	0.0278767	0.897718	0.929259
ENSMUST00000150889.1	Gm16046	Gm16046-203	chr17:13679494-13683487	-	processed_transcript	68.2954	56.5139	101.403	62.0985	94.3224	68.0231	75.404	74.8147	0.992185	-0.0113189	0.973529	0.980732
ENSMUST00000171581.1	Pick1	Pick1-211	chr15:79246335-79249466	+	processed_transcript	116.256	107.964	84.0017	72.8094	116.037	126.538	102.741	105.128	1.02324	0.0331443	0.906422	0.935195
ENSMUST00000217344.1	Gpx4-ps2	Gpx4-ps2-202	chr10:45875305-45876086	+	processed_transcript	2255.51	2536.26	2196.16	2279.79	2727.41	2048.05	2329.31	2351.75	1.00963	0.0138335	0.925442	0.94783
ENSMUST00000139605.1	Fxr2	Fxr2-205	chr11:69643548-69649801	+	processed_transcript	81.8284	102.276	43.3809	52.1172	89.0985	79.0443	75.8283	73.42	0.96824	-0.0465636	0.912109	0.938947
ENSMUST00000124914.1	Gm15860	Gm15860-201	chr5:123334332-123344437	-	antisense_RNA	54.1641	21.1835	31.9787	20.6584	35.1759	51.0355	35.7754	35.6233	0.995746	-0.0061499	0.991277	0.993249
ENSMUST00000138147.1	Ccdc43	Ccdc43-203	chr11:102689710-102697670	-	processed_transcript	50.4964	48.4954	71.7505	22.9835	97.3709	79.1183	56.9141	66.4909	1.16827	0.224373	0.705508	0.787755
ENSMUST00000129003.1	Fam217b	Fam217b-202	chr2:178414582-178420290	+	processed_transcript	30.3671	21.8201	9.69096	39.2985	6.34945	25.9	20.626	23.8493	1.15627	0.20948	0.789468	0.855158
ENSMUST00000137152.1	Chd6	Chd6-205	chr2:160960064-160964796	-	processed_transcript	75.0093	34.8776	41.4718	34.4363	58.2535	54.3877	50.4529	49.0258	0.971715	-0.0413945	0.926088	0.948299
ENSMUST00000152441.1	Rpl35	Rpl35-203	chr2:39001619-39005043	-	processed_transcript	376.669	493.25	654.698	383.33	759.114	419.541	508.206	520.661	1.02451	0.034933	0.93536	0.956045
ENSMUST00000127075.1	Tspan9	Tspan9-205	chr6:128081837-128143594	-	processed_transcript	44.2021	56.2695	68.6646	49.7718	36.2689	94.0658	56.3787	60.0355	1.06486	0.090665	0.855486	0.902227
ENSMUST00000145660.7	Fbxw2	Fbxw2-211	chr2:34812738-34826167	-	processed_transcript	34.5427	46.2381	31.9364	37.254	43.849	30.8547	37.5724	37.3192	0.993261	-0.00975485	0.967161	0.976856
ENSMUST00000122883.1	Dcxr	Dcxr-203	chr11:120725455-120727229	-	processed_transcript	45.8589	49.7359	21.9153	43.0956	24.3616	47.0343	39.17	38.1638	0.974312	-0.0375436	0.93251	0.953518
ENSMUST00000182943.1	Gm27000	Gm27000-201	chrX:88759471-88760312	-	lincRNA	26.7919	29.5844	30.8968	25.5343	24.0829	39.3168	29.091	29.6447	1.01903	0.0271986	0.917211	0.942658
ENSMUST00000173070.7	1110038B12Rik	1110038B12Rik-203	chr17:34950241-34952471	-	lincRNA	81.3669	47.5168	42.332	47.2342	59.4941	57.4963	57.0719	54.7415	0.959167	-0.0601453	0.864545	0.907791
ENSMUST00000207289.1	Homer2	Homer2-204	chr7:81623567-81706925	-	processed_transcript	117.525	89.0388	131.35	181.001	170.902	43.7039	112.638	131.869	1.17073	0.227409	0.696765	0.781804
ENSMUST00000164821.1	Kdm4a	Kdm4a-206	chr4:118149051-118161657	-	processed_transcript	35.6828	16.2301	34.9695	25.1231	20.4405	38.7467	28.9608	28.1034	0.970396	-0.0433549	0.923695	0.946618
ENSMUST00000208357.1	Hikeshi	Hikeshi-209	chr7:89918704-89941199	-	processed_transcript	114.063	166.561	172.541	113.633	172.3	164.461	151.055	150.131	0.993884	-0.00885109	0.973498	0.980896
ENSMUST00000129206.1	Bcl2l11	Bcl2l11-206	chr2:128127575-128130145	+	processed_transcript	48.0738	38.9626	33.5802	53.8041	23.8006	48.1278	40.2055	41.9109	1.04241	0.0599296	0.874456	0.914575
ENSMUST00000195518.1	Gm15853	Gm15853-202	chr1:166377878-166379918	-	lincRNA	33.852	31.9833	30.3699	21.2662	46.7541	32.4025	32.0684	33.4743	1.04384	0.0619012	0.859424	0.904487
ENSMUST00000140033.1	Myom2	Myom2-205	chr8:15119007-15131160	+	processed_transcript	29.0907	40.8832	32.6392	61.6225	40.3833	15.2789	34.2044	39.0949	1.14298	0.192799	0.741685	0.815676
ENSMUST00000143874.7	Lrp4	Lrp4-203	chr2:91457511-91479287	+	processed_transcript	49.1548	52.3298	32.6952	37.3399	39.7056	55.3531	44.7266	44.1329	0.986725	-0.0192794	0.946438	0.962291
ENSMUST00000138961.1	Mrps6	Mrps6-202	chr16:92106261-92112227	+	processed_transcript	31.3089	35.395	30.0244	16.0554	47.4435	42.6207	32.2428	35.3732	1.09709	0.13368	0.767485	0.838012
ENSMUST00000222402.1	Jag2	Jag2-208	chr12:112921837-112928448	-	processed_transcript	43.3616	50.7486	59.6267	43.4783	58.1109	50.6157	51.2456	50.735	0.990036	-0.0144475	0.939495	0.95852
ENSMUST00000222277.1	1810034E14Rik	1810034E14Rik-204	chr13:64248728-64271852	+	antisense_RNA	90.031	42.5324	98.9421	61.1164	65.9118	91.5622	77.1685	72.8635	0.944213	-0.0828157	0.839284	0.891861
ENSMUST00000225877.1	Isca1	Isca1-207	chr13:59756762-59769477	-	processed_transcript	86.5166	56.9602	61.6648	32.8486	131.068	68.5878	68.3806	77.5014	1.13338	0.180637	0.777199	0.845139
ENSMUST00000130709.1	Chd7	Chd7-205	chr4:8840322-8844721	+	processed_transcript	14.0928	25.9401	21.6738	14.6564	9.984	52.5456	20.5689	25.7287	1.25085	0.322911	0.729573	0.806935
ENSMUST00000156503.1	Uqcrq	Uqcrq-204	chr11:53428953-53430831	-	processed_transcript	502.309	715.888	395.003	446.604	630.219	488.858	537.733	521.894	0.970545	-0.0431335	0.891923	0.925733
ENSMUST00000141274.1	Ndufa5	Ndufa5-204	chr6:24518667-24527526	-	processed_transcript	8902.82	4281.32	10720.8	9727.16	6240.55	6500.4	7968.31	7489.37	0.939894	-0.0894294	0.839795	0.892215
ENSMUST00000203855.1	Gm38708	Gm38708-201	chr6:88188397-88190681	-	lincRNA	46.0029	63.3921	53.5656	55.5743	52.5949	51.4886	54.3202	53.2193	0.979733	-0.0295396	0.842076	0.893697
ENSMUST00000127784.1	Ift57	Ift57-202	chr16:49699355-49711867	+	processed_transcript	58.1445	132.486	75.5892	138.347	52.3405	77.4014	88.74	89.363	1.00702	0.0100923	0.986259	0.989993
ENSMUST00000124587.1	Grb10	Grb10-204	chr11:11936718-11938616	-	processed_transcript	44.5866	14.4797	30.3463	37.8974	125.51	3.96257	29.8042	55.7898	1.87188	0.904486	0.523739	0.632909
ENSMUST00000214560.1	AC139579.1	AC139579.1-201	chr7:102235854-102237530	+	processed_transcript	18.9782	39.0416	12.3865	16.9959	35.3423	14.6843	23.4688	22.3408	0.951937	-0.0710618	0.9184	0.943303
ENSMUST00000128389.1	Mfng	Mfng-203	chr15:78766874-78771894	-	processed_transcript	53.5688	60.7655	37.9203	40.4811	63.9243	45.819	50.7515	50.0748	0.986665	-0.0193675	0.948194	0.963106
ENSMUST00000213070.1	Mphosph6	Mphosph6-203	chr8:117791645-117793217	-	processed_transcript	39.4082	40.3705	40.8792	36.2619	32.0764	53.7025	40.2193	40.6803	1.01146	0.0164405	0.947958	0.96306
ENSMUST00000174321.1	BC051226	BC051226-202	chr17:33908294-33909317	-	antisense_RNA	96.8591	105.043	33.2373	54.934	83.4217	70.6724	78.3799	69.676	0.888953	-0.169821	0.736703	0.811082
ENSMUST00000128710.1	Dennd4c	Dennd4c-203	chr4:86777843-86781752	+	processed_transcript	13.1592	24.3617	15.1575	4.72506	47.1499	20.7936	17.5595	24.2228	1.37948	0.46412	0.631145	0.729124
ENSMUST00000187771.6	Morf4l1	Morf4l1-204	chr9:90092402-90114289	-	processed_transcript	135.524	53.807	130.759	108.839	97.4786	85.5126	106.697	97.2768	0.911713	-0.133348	0.747644	0.820974
ENSMUST00000126051.1	Fbxw2	Fbxw2-207	chr2:34825263-34826215	-	processed_transcript	64.4146	63.451	47.4698	57.0293	35.7453	90.4143	58.4451	61.063	1.04479	0.063215	0.883939	0.921623
ENSMUST00000201728.1	1110006O24Rik	1110006O24Rik-201	chr5:115631049-115631816	-	lincRNA	38.0472	30.659	24.1905	23.7603	32.7017	34.421	30.9656	30.2943	0.978322	-0.0316181	0.903348	0.932978
ENSMUST00000224923.1	Kif13a	Kif13a-206	chr13:46901098-46929867	-	processed_transcript	64.177	36.5532	76.693	44.4132	68.6749	55.8691	59.1411	56.3191	0.952284	-0.0705367	0.847665	0.896418
ENSMUST00000034183.9	Crnde	Crnde-201	chr8:92326038-92356120	-	bidirectional_promoter_lncRNA	47.0531	35.4812	24.794	36.7734	46.4348	22.8756	35.7761	35.3613	0.988405	-0.0168257	0.96686	0.976748
ENSMUST00000150606.1	Pex11a	Pex11a-203	chr7:79737089-79743131	-	processed_transcript	43.6731	16.0511	55.0503	28.2025	29.0018	44.4285	38.2582	33.8776	0.8855	-0.175436	0.74802	0.821029
ENSMUST00000133000.1	Cacna1g	Cacna1g-212	chr11:94425240-94426462	-	processed_transcript	36.8346	14.5449	42.6456	20.7099	24.6236	42.1019	31.3417	29.1452	0.929916	-0.104827	0.848732	0.896606
ENSMUST00000175869.7	Rhot2	Rhot2-203	chr17:25842256-25844569	-	processed_transcript	18.0128	68.7748	35.2074	16.0217	56.5477	45.2159	40.665	39.2617	0.965492	-0.0506637	0.945191	0.961606
ENSMUST00000154328.7	Acss1	Acss1-205	chr2:150628502-150638115	-	processed_transcript	34.532	25.0904	15.0481	21.3025	18.9855	30.2156	24.8902	23.5012	0.944196	-0.0828413	0.843255	0.894007
ENSMUST00000142924.1	Mical3	Mical3-205	chr6:120950683-120957723	-	processed_transcript	77.5287	103.199	74.7763	59.3523	68.7227	137.147	85.1679	88.4075	1.03804	0.0538579	0.907336	0.935755
ENSMUST00000135993.7	Ebf1	Ebf1-204	chr11:44618179-44643469	+	processed_transcript	72.8062	85.5812	42.0713	103.468	33.072	71.4482	66.8196	69.3294	1.03756	0.0531957	0.92207	0.945723
ENSMUST00000130060.1	Ewsr1	Ewsr1-206	chr11:5070690-5072220	-	processed_transcript	47.292	43.257	23.7958	56.3192	15.6533	51.4414	38.1149	41.138	1.07931	0.110115	0.84741	0.896713
ENSMUST00000147823.1	Mdm2	Mdm2-207	chr10:117702259-117710292	-	processed_transcript	232.254	186.425	173.853	207.552	261.492	128.776	197.511	199.273	1.00892	0.0128181	0.96885	0.977386
ENSMUST00000138998.1	Nup85	Nup85-206	chr11:115581641-115583906	+	processed_transcript	48.11	23.2713	22.0753	32.2252	24.1945	29.3973	31.1522	28.6057	0.918255	-0.123033	0.786806	0.853376
ENSMUST00000131787.1	2410006H16Rik	2410006H16Rik-201	chr11:62602877-62604807	+	processed_transcript	877.804	1028.5	861.456	907.551	788.069	1008.4	922.587	901.34	0.97697	-0.0336135	0.810491	0.869517
ENSMUST00000125408.7	Surf2	Surf2-202	chr2:26916669-26919821	+	processed_transcript	29.8929	44.4889	55.0842	45.8986	78.3319	18.8898	43.1553	47.7068	1.10547	0.144655	0.819397	0.877204
ENSMUST00000218770.1	Rnf126	Rnf126-202	chr10:79758542-79766941	-	processed_transcript	115.821	36.0558	80.3539	43.8202	112.582	62.8265	77.4103	73.0762	0.944012	-0.0831234	0.895116	0.9279
ENSMUST00000149076.7	Nt5m	Nt5m-203	chr11:59839447-59876533	+	processed_transcript	208.384	113.985	227.759	118.328	276.656	152.566	183.376	182.517	0.995313	-0.00677839	0.989178	0.99233
ENSMUST00000219034.1	AC148324.1	AC148324.1-201	chr12:78222286-78226525	-	bidirectional_promoter_lncRNA	105.995	81.773	105.452	90.9299	95.4649	97.1503	97.7399	94.515	0.967005	-0.0484041	0.714116	0.795251
ENSMUST00000143444.7	Rangrf	Rangrf-205	chr11:68972487-68973343	-	processed_transcript	37.9847	91.9225	32.1141	32.661	79.1548	40.0099	54.0071	50.6086	0.937073	-0.0937669	0.893732	0.927229
ENSMUST00000135037.7	2810001G20Rik	2810001G20Rik-201	chr11:64079484-64083259	+	antisense_RNA	333.371	316.16	345.036	270.566	365.325	338.432	331.522	324.774	0.979646	-0.0296681	0.829809	0.885528
ENSMUST00000154669.7	Pex16	Pex16-203	chr2:92375493-92379321	+	processed_transcript	57.4581	16.1387	91.9454	143.779	19.2719	28.2138	55.1808	63.755	1.15539	0.208374	0.860285	0.905203
ENSMUST00000146342.1	Popdc2	Popdc2-205	chr16:38371998-38374137	+	processed_transcript	106.507	84.012	78.0609	78.2077	85.6347	95.4644	89.5265	86.4356	0.965475	-0.0506892	0.772693	0.84151
ENSMUST00000085086.5	Trip11	Trip11-202	chr12:101912276-101913155	-	processed_transcript	48.2205	47.4072	51.8043	49.8297	33.3257	65.1659	49.144	49.4404	1.00603	0.00867582	0.97608	0.982712
ENSMUST00000140405.8	Tmem134	Tmem134-209	chr19:4125989-4131727	+	processed_transcript	343.621	335.985	361.652	259.348	382	384.222	347.086	341.857	0.984933	-0.0219029	0.906815	0.935409
ENSMUST00000150708.1	Sppl3	Sppl3-204	chr5:115011146-115061601	+	processed_transcript	45.1404	31.94	58.9256	39.8487	48.0796	40.4137	45.3353	42.7807	0.94365	-0.0836762	0.771766	0.840683
ENSMUST00000105240.7	Timeless	Timeless-202	chr10:128247340-128252939	+	processed_transcript	382.52	306.781	313.451	382.072	267.228	328.323	334.251	325.874	0.97494	-0.0366144	0.848349	0.896765
ENSMUST00000153286.1	Tie1	Tie1-202	chr4:118478032-118489793	-	processed_transcript	151.98	107.353	130.379	63.1842	191.862	159.864	129.904	138.303	1.06466	0.0903886	0.846834	0.896669
ENSMUST00000130237.1	Mib2	Mib2-203	chr4:155657624-155658339	-	processed_transcript	100.765	126.726	109.846	77.9289	78.6011	208.353	112.446	121.628	1.08166	0.113246	0.844977	0.895455
ENSMUST00000160038.1	Lmo7	Lmo7-213	chr14:101929261-101932866	+	processed_transcript	363.664	71.2472	173.604	113.997	176.475	202.861	202.838	164.444	0.810716	-0.302731	0.690447	0.777834
ENSMUST00000182498.7	Snhg6	Snhg6-202	chr1:9942025-9944103	-	lincRNA	82.2143	25.0367	73.6886	29.0601	45.8413	103.259	60.3132	59.3867	0.984639	-0.0223329	0.975767	0.982593
ENSMUST00000126967.1	Gm13375	Gm13375-201	chr2:20969054-20969997	+	antisense_RNA	750.466	672.866	643.361	527.873	818.342	680.45	688.898	675.555	0.980632	-0.0282169	0.889025	0.924439
ENSMUST00000148682.1	Tnks1bp1	Tnks1bp1-205	chr2:85050893-85058557	+	processed_transcript	370.039	415.171	348.909	281.775	401.294	428.553	378.04	370.541	0.980163	-0.0289064	0.88607	0.9227
ENSMUST00000133469.1	Chm	Chm-203	chrX:113116289-113185509	-	processed_transcript	12.6293	18.3783	10.461	1.96655	23.7765	46.883	13.8229	24.2087	1.75135	0.808466	0.474816	0.591232
ENSMUST00000211284.1	AW046200	AW046200-202	chr8:57651757-57662548	+	bidirectional_promoter_lncRNA	25.5968	16.125	27.6317	22.0743	14.7881	31.5272	23.1178	22.7965	0.986101	-0.020192	0.959889	0.972435
ENSMUST00000193809.1	Tug1	Tug1-205	chr11:3648062-3649673	-	antisense_RNA	319.95	286.702	338.749	258.416	372.957	289.732	315.134	307.035	0.9743	-0.037562	0.839208	0.891968
ENSMUST00000181800.1	1110046J04Rik	1110046J04Rik-203	chr13:33936032-33960181	+	antisense_RNA	60.8553	22.2529	30.6748	31.8991	18.2533	64.0691	37.9277	38.0738	1.00385	0.0055486	0.99389	0.994877
ENSMUST00000145297.1	Gm14376	Gm14376-201	chr7:144469533-144469993	-	sense_intronic	48.2453	33.9988	19.4068	20.1811	33.9735	41.6681	33.8837	31.9409	0.942663	-0.0851856	0.861319	0.905724
ENSMUST00000136273.1	Myo1b	Myo1b-209	chr1:51766876-51776436	-	processed_transcript	26.5706	39.9044	16.2901	27.9405	31.8667	17.352	27.5884	25.7197	0.932268	-0.101184	0.828754	0.884777
ENSMUST00000126589.1	Arfip2	Arfip2-203	chr7:105637120-105637915	-	processed_transcript	22.3787	29.9436	18.8249	28.4539	14.4807	27.3586	23.7157	23.4311	0.987997	-0.0174212	0.9616	0.972799
ENSMUST00000140855.1	Acap3	Acap3-207	chr4:155905359-155905917	+	processed_transcript	24.2231	38.7747	20.5739	17.827	25.1547	38.4929	27.8572	27.1582	0.974908	-0.0366623	0.936287	0.956216
ENSMUST00000124179.1	Midn	Midn-203	chr10:80149886-80153687	+	processed_transcript	32.5983	50.8556	47.5566	49.4194	35.6548	39.9311	43.6702	41.6684	0.954161	-0.0676951	0.787195	0.853614
ENSMUST00000124047.7	Gm12224	Gm12224-201	chr11:54340369-54353479	-	antisense_RNA	42.9318	31.9476	65.1845	22.6883	63.4204	55.4505	46.688	47.1864	1.01068	0.0153204	0.976405	0.982843
ENSMUST00000200992.3	Zfp513	Zfp513-203	chr5:31199881-31200762	-	processed_transcript	11.5164	17.9337	17.1242	59.2821	53.1592	1	15.5248	37.8138	2.4357	1.28434	0.296961	0.428311
ENSMUST00000130398.1	Cluh	Cluh-205	chr11:74649495-74656551	+	processed_transcript	91.7174	70.2774	57.6544	54.678	58.7941	102.867	73.2164	72.1129	0.984929	-0.0219085	0.954933	0.968583
ENSMUST00000146603.1	Crat	Crat-209	chr2:30400476-30406679	-	processed_transcript	51.984	88.5196	46.3593	36.9155	69.1408	74.256	62.2876	60.1041	0.964944	-0.0514827	0.907473	0.935703
ENSMUST00000132265.1	Park7	Park7-207	chr4:150897384-150901835	-	processed_transcript	66.5715	55.6014	57.0602	60.7359	61.6653	50.0576	59.7444	57.4863	0.962204	-0.0555849	0.679047	0.767565
ENSMUST00000185273.1	Ndufv3	Ndufv3-203	chr17:31529093-31531326	+	processed_transcript	31.32	21.0395	38.4217	26.0891	15.5987	55.1739	30.2604	32.2872	1.06698	0.0935312	0.882474	0.920859
ENSMUST00000212477.1	Trappc2l	Trappc2l-203	chr8:122611640-122614270	+	processed_transcript	29.5301	16.9072	55.9374	13.0051	64.8644	29.2856	34.1249	35.7184	1.04669	0.0658406	0.93768	0.957251
ENSMUST00000127013.1	Tanc1	Tanc1-205	chr2:59706844-59724847	+	processed_transcript	50.292	18.1641	9.64495	29.71	41.5161	6.31041	26.0337	25.8455	0.992771	-0.0104678	0.991249	0.993418
ENSMUST00000153242.1	Ppp5c	Ppp5c-209	chr7:17015463-17027615	-	processed_transcript	28.1403	52.979	57.224	39.928	41.8176	45.1049	46.1144	42.2835	0.916926	-0.125123	0.698348	0.783232
ENSMUST00000209776.1	Bcor	Bcor-208	chrX:12131493-12160346	-	processed_transcript	159.857	164.387	150.866	128.945	176.477	153.719	158.37	153.047	0.966386	-0.0493286	0.728379	0.8065
ENSMUST00000222733.1	Card19	Card19-203	chr13:49203837-49216037	-	processed_transcript	207.167	234.429	181.43	114.904	300.026	225.488	207.675	213.472	1.02791	0.0397198	0.922411	0.94588
ENSMUST00000132770.1	Nol4l	Nol4l-204	chr2:153417826-153445581	-	processed_transcript	44.7427	22.9172	20.3149	19.8786	28.4561	32.4868	29.3249	26.9405	0.918689	-0.122351	0.795122	0.857962
ENSMUST00000152606.1	Mphosph8	Mphosph8-205	chr14:56688381-56691249	+	processed_transcript	25.8235	40.1642	42.5671	59.6348	47.2305	13.8224	36.1849	40.2292	1.11177	0.152857	0.796106	0.858656
ENSMUST00000190773.6	Lad1	Lad1-203	chr1:135829995-135832707	+	processed_transcript	84.5463	81.7168	141.995	76.6143	82.9083	135.265	102.753	98.2627	0.956302	-0.0644622	0.876178	0.915996
ENSMUST00000151419.1	Psmc3	Psmc3-208	chr2:91054573-91055928	+	processed_transcript	21.4241	82.5965	77.0551	35.1942	62.3085	54.4281	60.3586	50.6436	0.839046	-0.253179	0.669527	0.761761
ENSMUST00000177896.7	Rab10os	Rab10os-202	chr12:3235526-3250377	+	antisense_RNA	43.3275	35.6148	49.6441	38.0566	40.8915	42.8573	42.8621	40.6018	0.947265	-0.0781596	0.626082	0.725938
ENSMUST00000228891.1	Acbd5	Acbd5-218	chr2:23069072-23080453	+	processed_transcript	32.2258	68.4155	67.7619	29.3565	91.389	48.4703	56.1344	56.4053	1.00483	0.00694496	0.990721	0.993284
ENSMUST00000094769.10	9930104L06Rik	9930104L06Rik-201	chr4:124937074-124944656	+	processed_transcript	53.5806	100.626	67.0963	41.8146	81.5731	91.9393	73.7676	71.7757	0.972996	-0.0394935	0.928003	0.949874
ENSMUST00000124818.1	Snhg15	Snhg15-201	chr11:6525625-6528441	-	processed_transcript	21.4852	36.1526	45.8979	40.6825	114.168	6.65088	34.5119	53.8338	1.55986	0.64142	0.584272	0.688231
ENSMUST00000134918.1	Socs2	Socs2-207	chr10:95412420-95414827	-	processed_transcript	59.9432	85.2011	52.6041	46.3123	52.3453	95.5671	65.9161	64.7415	0.982181	-0.0259396	0.952128	0.966322
ENSMUST00000189152.1	Atg4b	Atg4b-210	chr1:93755162-93768100	+	processed_transcript	25.0157	61.2176	54.6795	60.8697	22.2574	53.2925	46.9709	45.4732	0.968113	-0.0467531	0.930933	0.95268
ENSMUST00000223095.1	Cfl2	Cfl2-204	chr12:54861570-54862616	-	processed_transcript	1162.27	1312.96	1107.09	912.379	1448.89	1099.96	1194.11	1153.74	0.966199	-0.0496073	0.82278	0.880265
ENSMUST00000227063.1	AC161763.1	AC161763.1-201	chr7:144914470-144914637	+	lincRNA	207.837	158.782	172.165	113.059	270.631	159.641	179.595	181.11	1.00844	0.0121232	0.976797	0.983041
ENSMUST00000190235.1	Gm2415	Gm2415-204	chr9:118924452-118926455	-	antisense_RNA	69.9794	79.7478	88.3942	70.8852	73.5371	81.1825	79.3738	75.2016	0.947436	-0.0779	0.534732	0.643109
ENSMUST00000168943.7	Wiz	Wiz-206	chr17:32361675-32364463	-	processed_transcript	133.322	105.724	165.602	165.677	105.17	114.605	134.883	128.484	0.952561	-0.0701168	0.814562	0.873142
ENSMUST00000151817.1	Gm12305	Gm12305-201	chr11:68269558-68270879	-	sense_intronic	33.0758	23.0122	29.1526	20.2696	32.0157	29.0334	28.4135	27.1062	0.95399	-0.0679543	0.789603	0.854937
ENSMUST00000148285.7	Cdan1	Cdan1-207	chr2:120718186-120850128	-	processed_transcript	93.5015	71.1567	24.3217	58.9746	67.9443	34.2896	62.9933	53.7362	0.853046	-0.229305	0.704686	0.787186
ENSMUST00000131168.7	Acap3	Acap3-204	chr4:155892272-155899691	+	processed_transcript	55.5804	37.6218	24.6514	16.4975	40.7296	64.71	39.2845	40.6457	1.03465	0.0491413	0.938426	0.957624
ENSMUST00000223111.1	Srp54a	Srp54a-206	chr12:55080526-55089538	+	processed_transcript	228.617	116.799	68.8137	82.7499	149.499	124.848	138.077	119.032	0.862073	-0.214118	0.728767	0.806575
ENSMUST00000127855.1	Trmt6	Trmt6-202	chr2:132811767-132816013	-	processed_transcript	34.0513	11.818	25.3838	9.42428	21.0722	43.2336	23.751	24.5767	1.03476	0.0493001	0.947752	0.963045
ENSMUST00000153272.1	Prmt7	Prmt7-207	chr8:106234525-106237394	+	processed_transcript	19.8382	20.0808	14.5092	42.7008	9.58424	11.8341	18.1427	21.373	1.17805	0.236401	0.780487	0.847982
ENSMUST00000140386.7	Agpat2	Agpat2-203	chr2:26594503-26604417	-	processed_transcript	52.9308	40.2378	88.8246	27.7182	88.2451	64.6508	60.6644	60.2047	0.992422	-0.0109737	0.98491	0.98923
ENSMUST00000143418.1	Rps27a	Rps27a-203	chr11:29547116-29547891	-	processed_transcript	38.6541	34.6323	40.8004	23.9937	46.8622	40.4342	38.029	37.0967	0.975486	-0.0358071	0.901116	0.931819
ENSMUST00000126901.1	Gpi1	Gpi1-202	chr7:34227121-34229794	-	processed_transcript	34.6648	41.3612	38.8743	52.406	16.6081	53.0908	38.3001	40.7017	1.0627	0.087741	0.85361	0.901003
ENSMUST00000167386.7	Actb	Actb-206	chr5:142904395-142906725	-	processed_transcript	969.664	681.102	738.541	674.197	652.251	918.85	796.436	748.433	0.939728	-0.0896851	0.715776	0.79622
ENSMUST00000140617.1	Casz1	Casz1-205	chr4:148889381-148891936	+	processed_transcript	68.6047	63.58	59.3815	48.6618	53.0371	82.7779	63.8554	61.4923	0.962993	-0.0544035	0.841034	0.893156
ENSMUST00000156081.1	Gm12840	Gm12840-201	chr4:117700188-117700923	+	lincRNA	44.1486	1	39.0885	31.4048	1	45.2786	28.079	25.8945	0.922201	-0.116848	0.913458	0.939951
ENSMUST00000124163.7	Dnajc24	Dnajc24-202	chr2:105966784-106003263	-	processed_transcript	92.9323	28.1124	69.5433	63.2695	66.6091	35.5114	63.5294	55.13	0.867788	-0.204586	0.714232	0.795205
ENSMUST00000126639.1	Ywhag	Ywhag-203	chr5:135930685-135934616	-	processed_transcript	27.3392	4.28484	77.2711	26.3064	30.2607	9.36423	36.2984	21.9771	0.605457	-0.723904	0.558608	0.665154
ENSMUST00000186932.1	Ptma	Ptma-203	chr1:86526741-86529745	+	processed_transcript	134.211	240.856	122.569	92.9008	246.41	142.393	165.879	160.568	0.967985	-0.0469437	0.932432	0.953632
ENSMUST00000227067.1	Ywhaz	Ywhaz-209	chr15:36793539-36796929	-	processed_transcript	59.5571	91.8496	36.0911	40.0701	75.5417	53.6399	62.4993	56.4173	0.902687	-0.147702	0.767076	0.837929
ENSMUST00000140997.1	Mrpl22	Mrpl22-203	chr11:58171689-58177284	+	processed_transcript	65.5309	54.8339	55.6701	87.5009	32.9178	57.059	58.6783	59.1593	1.0082	0.0117765	0.977685	0.983541
ENSMUST00000154649.7	Rrbp1	Rrbp1-207	chr2:143947395-143952281	-	processed_transcript	21.2315	33.6793	20.7315	22.4551	29.912	18.1045	25.2141	23.4905	0.931641	-0.102154	0.768067	0.838466
ENSMUST00000117870.8	Hspa8	Hspa8-203	chr9:40801302-40803026	+	processed_transcript	171.132	130.899	171.125	60.4587	290.724	178.828	157.718	176.67	1.12016	0.163708	0.793757	0.857224
ENSMUST00000136087.1	Afdn	Afdn-205	chr17:13874907-13882405	+	processed_transcript	128.065	102.143	72.6029	128.731	64.5523	93.4015	100.937	95.5616	0.946744	-0.0789534	0.837189	0.890762
ENSMUST00000153814.1	Gm12905	Gm12905-201	chr4:123905062-123917269	-	antisense_RNA	36.262	16.088	24.3584	22.3091	15.2421	34.1448	25.5695	23.8987	0.934656	-0.0974933	0.845583	0.895533
ENSMUST00000154127.1	Ndufaf1	Ndufaf1-205	chr2:119660258-119662812	-	processed_transcript	142.95	81.908	134.498	225.946	76.1917	74.6741	119.786	125.604	1.04857	0.0684267	0.918913	0.943444
ENSMUST00000199647.1	Agap3	Agap3-204	chr5:24452334-24482328	+	processed_transcript	68.8361	106.524	90.1327	81.9045	70.6116	93.011	88.4976	81.8424	0.924798	-0.11279	0.62749	0.726734
ENSMUST00000208046.1	Gm32031	Gm32031-201	chr7:47008545-47009008	+	bidirectional_promoter_lncRNA	35.97	21.3852	55.8077	56.1314	12.5469	49.5859	37.721	39.4214	1.04508	0.0636113	0.924437	0.946993
ENSMUST00000130821.7	Dcaf10	Dcaf10-202	chr4:45342120-45370479	+	processed_transcript	23.7544	1	9.0009	1	172.944	1	11.2518	58.3147	5.18272	2.37371	0.46049	0.577964
ENSMUST00000220175.1	Tpgs1	Tpgs1-203	chr10:79669913-79675448	+	processed_transcript	43.9584	46.8831	47.1983	13.439	63.7239	91.7916	46.0133	56.3182	1.22395	0.29155	0.676579	0.766841
ENSMUST00000127859.1	Phactr1	Phactr1-204	chr13:42866834-42956675	+	processed_transcript	11.1777	80.2796	34.3051	39.6855	12.0039	52.1178	41.9208	34.6024	0.825423	-0.276794	0.771181	0.840773
ENSMUST00000208352.1	Cox6b1	Cox6b1-203	chr7:30616974-30623483	-	processed_transcript	56.1379	40.2558	77.6167	38.1737	60.3215	61.248	58.0035	53.2477	0.91801	-0.123418	0.736732	0.810937
ENSMUST00000206413.1	Ltbp4	Ltbp4-210	chr7:27311560-27333648	-	processed_transcript	24.3045	24.2424	45.4479	16.383	29.8247	44.0066	31.3316	30.0714	0.959779	-0.059226	0.911512	0.938907
ENSMUST00000198556.1	Sart3	Sart3-207	chr5:113754234-113754757	-	processed_transcript	42.5123	58.4075	64.4728	37.9501	61.5608	54.9596	55.1309	51.4902	0.933963	-0.0985634	0.724033	0.802746
ENSMUST00000227758.1	AC155729.1	AC155729.1-201	chr6:39207068-39207611	+	bidirectional_promoter_lncRNA	56.2239	40.9975	51.495	74.7071	15.2632	83.4825	49.5721	57.8176	1.16633	0.22198	0.725599	0.804128
ENSMUST00000148068.7	Adam15	Adam15-209	chr3:89339641-89341157	-	processed_transcript	48.9512	17.108	19.4198	25.0075	27.9209	18.6778	28.493	23.8687	0.837705	-0.255485	0.68538	0.773162
ENSMUST00000211421.1	Gm31105	Gm31105-201	chr8:80879940-80881169	+	antisense_RNA	142.547	208.118	172.305	115.251	160.924	219.768	174.323	165.314	0.94832	-0.0765543	0.813202	0.872054
ENSMUST00000147633.8	Tmem134	Tmem134-210	chr19:4125959-4131727	+	processed_transcript	13.2277	39.5098	5.5883	1	28.5222	81.316	19.4419	36.9461	1.90033	0.926249	0.533302	0.642155
ENSMUST00000212225.1	Slc27a1	Slc27a1-206	chr8:71569679-71579655	+	processed_transcript	77.2728	129.218	102.057	117.633	63.2929	108.566	102.849	96.4971	0.93824	-0.0919717	0.791957	0.856381
ENSMUST00000131865.1	Selenom	Selenom-203	chr11:3514702-3517130	+	processed_transcript	14.8488	25.1058	23.2724	38.3119	6.93891	25.7873	21.0756	23.6794	1.12354	0.168053	0.800634	0.862432
ENSMUST00000150500.7	Nme3	Nme3-204	chr17:24896505-24897335	+	processed_transcript	31.4199	119.269	35.6076	39.9792	58.9767	44.6671	62.0987	47.8743	0.77094	-0.37531	0.651386	0.746856
ENSMUST00000151557.1	Tead3	Tead3-204	chr17:28333923-28336344	-	processed_transcript	50.2551	69.4724	25.8267	37.2828	37.0485	51.3281	48.5181	41.8865	0.863317	-0.212038	0.648596	0.744843
ENSMUST00000110175.8	Tbc1d31	Tbc1d31-202	chr15:57912234-57959402	+	processed_transcript	46.8295	26.5801	32.952	27.8572	41.5129	27.7598	35.4539	32.3766	0.913204	-0.13099	0.70348	0.786361
ENSMUST00000203086.1	Gm44731	Gm44731-201	chr6:43264542-43265855	-	antisense_RNA	35.9967	34.8647	39.4469	22.0838	22.8883	76.4354	36.7694	40.4692	1.10062	0.138316	0.847497	0.896617
ENSMUST00000138608.7	Abhd12	Abhd12-203	chr2:150837359-150904662	-	processed_transcript	22.027	36.3403	15.9114	17.3298	51.9072	11.0444	24.7596	26.7605	1.08081	0.112115	0.893807	0.927116
ENSMUST00000128400.1	Dnase2a	Dnase2a-203	chr8:84908721-84914521	+	processed_transcript	59.2021	37.8579	89.9951	73.3344	63.6816	33.5905	62.3517	56.8688	0.912066	-0.132791	0.790375	0.855405
ENSMUST00000194821.1	Zfp639	Zfp639-209	chr3:32510896-32513175	+	processed_transcript	136.75	203.114	86.9607	98.3232	123.487	154.641	142.275	125.484	0.88198	-0.181182	0.676544	0.767146
ENSMUST00000185414.1	2610306M01Rik	2610306M01Rik-201	chr6:86848399-86849440	-	bidirectional_promoter_lncRNA	188.13	172.224	235.413	188.016	166.198	189.524	198.589	181.246	0.912669	-0.131836	0.443504	0.564664
ENSMUST00000220679.1	Exoc3	Exoc3-203	chr13:74171999-74176479	-	processed_transcript	31.2239	13.7502	22.5869	54.4479	5.86687	23.4299	22.5203	27.9149	1.23954	0.309806	0.738485	0.812688
ENSMUST00000181032.1	A930029G22Rik	A930029G22Rik-201	chr17:69416660-69439304	-	lincRNA	29.3975	17.3879	34.4327	16.8266	23.7487	33.9703	27.0727	24.8485	0.917845	-0.123677	0.76962	0.839252
ENSMUST00000126702.1	Notch4	Notch4-202	chr17:34586945-34587501	+	processed_transcript	50.9737	89.8319	85.7924	61.1962	94.0757	52.5552	75.5327	69.2757	0.917162	-0.124751	0.741101	0.815211
ENSMUST00000136353.1	Flot2	Flot2-204	chr11:78040304-78060434	+	processed_transcript	76.5374	101.289	1.37651	87.0225	1.28546	73.4697	59.7343	53.9259	0.902762	-0.147582	0.89192	0.92592
ENSMUST00000145820.1	Stard8	Stard8-203	chrX:99043984-99065823	+	processed_transcript	50.0737	55.5319	42.9706	81.8891	40.351	27.8129	49.5254	50.0177	1.00994	0.0142693	0.97795	0.983612
ENSMUST00000145414.1	Mov10	Mov10-205	chr3:104805429-104818301	-	processed_transcript	24.823	33.2797	54.0696	49.8969	95.3202	7.20599	37.3908	50.8077	1.35883	0.442366	0.643925	0.74066
ENSMUST00000154892.1	Myo18a	Myo18a-218	chr11:77824554-77827641	+	processed_transcript	33.1513	25.3502	43.8651	35.4917	16.7355	47.2884	34.1222	33.1719	0.97215	-0.0407493	0.931517	0.95289
ENSMUST00000216147.1	A830035O19Rik	A830035O19Rik-201	chr9:45954101-45955998	+	antisense_RNA	38.7001	29.7095	21.6738	33.6221	26.5179	21.2851	30.0278	27.1417	0.903887	-0.145785	0.659759	0.754053
ENSMUST00000220378.1	AC153911.1	AC153911.1-201	chr10:122985074-122985831	-	processed_transcript	197.72	146.331	160.619	94.0279	202.504	185.54	168.223	160.691	0.955222	-0.0660927	0.848639	0.896696
ENSMUST00000186480.1	Zbtb11os1	Zbtb11os1-201	chr16:55973268-55974617	-	antisense_RNA	200.919	186.312	154.944	178.624	120.907	203.754	180.725	167.762	0.928272	-0.107381	0.667732	0.760234
ENSMUST00000124439.1	Gm14207	Gm14207-201	chr2:119321343-119325564	-	processed_transcript	29.8693	73.2645	99.237	48.163	41.2673	82.4104	67.4569	57.2802	0.849138	-0.235929	0.692176	0.778737
ENSMUST00000146183.1	Mrpl2	Mrpl2-204	chr17:46649012-46649998	+	processed_transcript	43.0628	70.5534	47.4825	54.7877	35.2421	56.3084	53.6996	48.7794	0.908376	-0.138638	0.674895	0.76631
ENSMUST00000130987.1	Sh3kbp1	Sh3kbp1-209	chrX:159943018-159973190	+	processed_transcript	151.993	365.939	233.543	221.544	172.369	256.025	250.491	216.646	0.864885	-0.209421	0.639521	0.736436
ENSMUST00000148612.1	Nudc	Nudc-203	chr4:133534228-133535927	-	processed_transcript	84.089	46.0442	37.9706	65.915	40.2125	41.6931	56.0346	49.2735	0.879341	-0.185505	0.702649	0.785782
ENSMUST00000142884.1	Ybx1	Ybx1-204	chr4:119285002-119294480	-	processed_transcript	84.3005	110.768	122.85	24.6236	189.316	184.498	105.973	132.812	1.25327	0.325696	0.652797	0.748133
ENSMUST00000131059.1	Abr	Abr-207	chr11:76423048-76437220	-	processed_transcript	215.725	199.697	105.055	132.769	182.105	139.576	173.492	151.483	0.873142	-0.195712	0.59186	0.694894
ENSMUST00000178074.7	Rab10os	Rab10os-203	chr12:3235504-3241410	+	antisense_RNA	84.3109	52.7107	68.4673	49.0977	73.3801	62.7626	68.4963	61.7468	0.901462	-0.149662	0.589273	0.692664
ENSMUST00000161529.1	Gm16537	Gm16537-201	chr15:99715543-99724474	-	antisense_RNA	71.8967	27.9551	52.8441	32.8054	49.9861	48.1089	50.8986	43.6335	0.857263	-0.222191	0.627299	0.726848
ENSMUST00000207247.1	Map2k7	Map2k7-210	chr8:4246673-4247897	+	processed_transcript	50.6657	103.068	51.9758	36.6782	135.859	40.3528	68.5697	70.9635	1.03491	0.0495058	0.95121	0.965779
ENSMUST00000136862.7	E130307A14Rik	E130307A14Rik-203	chr10:39653897-39728181	-	antisense_RNA	18.4118	22.6508	32.9953	21.5117	18.8878	25.078	24.6859	21.8258	0.884139	-0.177654	0.574751	0.679877
ENSMUST00000156304.1	Srebf1	Srebf1-212	chr11:60201366-60202624	-	processed_transcript	20.1698	39.8337	16.6228	23.5204	17.2777	24.3279	25.5421	21.7086	0.849916	-0.234608	0.638553	0.735994
ENSMUST00000131062.1	Plxnb2	Plxnb2-203	chr15:89164891-89165797	-	processed_transcript	32.1998	36.0108	41.6802	46.0046	7.17735	108.195	36.6302	53.7922	1.46852	0.554362	0.592524	0.695512
ENSMUST00000147336.7	Trmt6	Trmt6-205	chr2:132804207-132816055	-	processed_transcript	53.2109	1	80.4816	60.5619	52.2149	1	44.8975	37.9256	0.844715	-0.243463	0.826731	0.883553
ENSMUST00000132856.1	Nprl3	Nprl3-210	chr11:32262818-32267551	-	processed_transcript	54.6719	35.4221	92.9419	60.2552	45.6947	48.2598	61.012	51.4032	0.842511	-0.247233	0.61197	0.713352
ENSMUST00000147205.1	Uxt	Uxt-205	chrX:20961417-20961974	-	processed_transcript	48.3157	55.8869	75.1452	54.6954	46.0066	59.4196	59.7826	53.3739	0.892799	-0.163593	0.511301	0.62326
ENSMUST00000127057.1	Nudcd2	Nudcd2-202	chr11:40733744-40736412	+	processed_transcript	81.2238	35.4043	39.7377	16.7773	56.5011	88.756	52.122	54.0115	1.03625	0.051375	0.944333	0.961121
ENSMUST00000129608.1	Plgrkt	Plgrkt-203	chr19:29360854-29363899	-	processed_transcript	66.5665	32.2813	52.9573	28.6756	33.3515	87.2378	50.6017	49.755	0.983267	-0.0243445	0.970154	0.97831
ENSMUST00000141712.7	Pdk2	Pdk2-204	chr11:95029654-95040558	-	processed_transcript	74.8171	185.128	312.02	505.06	88.5474	70.5997	190.655	221.402	1.16127	0.215706	0.854829	0.901911
ENSMUST00000147682.1	Ghdc	Ghdc-203	chr11:100766811-100768713	-	processed_transcript	25.6316	30.7416	22.8952	19.8476	28.4632	23.2887	26.4228	23.8665	0.903254	-0.146797	0.493891	0.607922
ENSMUST00000151857.1	A930004D18Rik	A930004D18Rik-203	chr2:18027974-18028871	-	processed_transcript	44.6725	68.2816	98.551	92.1088	15.0445	158.056	70.5017	88.403	1.25391	0.326438	0.706006	0.787961
ENSMUST00000124810.7	Ppig	Ppig-203	chr2:69722854-69733353	+	processed_transcript	34.5924	23.4799	60.6354	3.80995	64.3807	146.238	39.5692	71.4763	1.80636	0.853085	0.496565	0.609723
ENSMUST00000152598.1	Rad50	Rad50-205	chr11:53691921-53695000	-	processed_transcript	22.9135	34.2381	16.3559	41.6594	9.18829	24.3831	24.5025	25.0769	1.02344	0.0334326	0.959895	0.972245
ENSMUST00000183083.7	Bvht	Bvht-201	chr18:61639542-61647292	+	lincRNA	95.5027	27.8066	77.0161	114.727	24.2065	53.47	66.7752	64.1344	0.960453	-0.0582134	0.940879	0.959156
ENSMUST00000128640.7	Errfi1	Errfi1-203	chr4:150855073-150855814	+	processed_transcript	173.176	170.904	112.274	193.25	106.86	116.564	152.118	138.891	0.913049	-0.131235	0.715678	0.796287
ENSMUST00000137291.1	Set	Set-205	chr2:30067193-30069630	+	processed_transcript	46.6448	17.9819	39.7152	23.858	23.9004	42.2972	34.7806	30.0186	0.863083	-0.212429	0.67636	0.76711
ENSMUST00000126601.7	Fbxw5	Fbxw5-204	chr2:25500818-25503813	+	processed_transcript	22.6622	29.9632	32.4724	23.2434	47.7619	14.3756	28.3659	28.4603	1.00333	0.00479186	0.9932	0.994582
ENSMUST00000209785.1	Gm26881	Gm26881-202	chr4:43045966-43053251	+	antisense_RNA	133.471	125.342	165.155	97.2007	111.783	183.869	141.323	130.951	0.926608	-0.109968	0.742189	0.816051
ENSMUST00000150165.7	Tmem141	Tmem141-206	chr2:25620104-25621963	-	processed_transcript	351.334	354.226	361.378	292.731	603.682	183.913	355.646	360.109	1.01255	0.0179908	0.973402	0.980996
ENSMUST00000187366.1	Gm29093	Gm29093-201	chr10:80587965-80589790	-	sense_intronic	67.3658	85.7194	58.4925	42.5767	73.7141	77.6951	70.5259	64.662	0.916854	-0.125236	0.69055	0.777602
ENSMUST00000142900.7	St3gal6	St3gal6-209	chr16:58493754-58523724	-	processed_transcript	87.2698	163.211	23.6172	48.3325	62.2339	80.5583	91.3658	63.7082	0.697287	-0.520175	0.5408	0.648086
ENSMUST00000154549.1	Stard7	Stard7-208	chr2:127292111-127297367	+	processed_transcript	48.5147	22.4785	23.391	24.2102	52.4143	14.4244	31.4614	30.3496	0.964663	-0.0519035	0.941475	0.959569
ENSMUST00000135488.1	Strbp	Strbp-203	chr2:37634928-37703348	-	processed_transcript	29.9115	33.766	60.3092	26.588	39.3775	41.7426	41.3289	35.9027	0.868707	-0.203059	0.637274	0.734856
ENSMUST00000199386.1	Gm19708	Gm19708-201	chr3:138000939-138016044	+	lincRNA	12.8777	16.7578	10.0592	1	43.052	36.1558	13.2316	26.7359	2.02062	1.01479	0.362978	0.496924
ENSMUST00000129364.1	Zfp335os	Zfp335os-201	chr2:164911354-164919953	+	antisense_RNA	55.6214	52.2306	43.7635	49.1066	44.6579	41.5027	50.5385	45.0891	0.892173	-0.164605	0.260287	0.388542
ENSMUST00000124427.1	Dgkz	Dgkz-204	chr2:91935907-91938028	-	processed_transcript	23.3521	28.7285	54.7838	21.7426	41.731	28.9864	35.6215	30.82	0.865208	-0.20888	0.69349	0.779519
ENSMUST00000143999.7	Firre	Firre-203	chrX:50615395-50635321	-	processed_transcript	27.3229	21.4902	29.0344	20.4308	26.2336	22.7611	25.9492	23.1418	0.891814	-0.165185	0.378641	0.507609
ENSMUST00000125333.2	Man2c1os	Man2c1os-201	chr9:57099950-57131290	-	antisense_RNA	25.5114	33.959	25.275	22.947	22.2406	30.6157	28.2485	25.2678	0.894482	-0.160876	0.489142	0.603994
ENSMUST00000140661.1	Ipo13	Ipo13-204	chr4:117894892-117895873	-	processed_transcript	31.589	16.0381	32.4422	12.8416	21.3872	42.6516	26.6898	25.6268	0.960174	-0.0586317	0.923091	0.946384
ENSMUST00000153401.1	Fhl1	Fhl1-209	chrX:56787998-56789743	+	processed_transcript	152.392	148.008	179.433	166.935	119.922	144.043	159.944	143.634	0.898021	-0.155178	0.385474	0.514987
ENSMUST00000153443.1	Gm17029	Gm17029-203	chr4:148960360-148966998	+	antisense_RNA	101.163	72.029	74.6112	67.926	70.4588	80.6906	82.6009	73.0251	0.884071	-0.177766	0.396561	0.523415
ENSMUST00000212382.1	Nlrc5	Nlrc5-209	chr8:94434356-94470008	+	processed_transcript	43.6631	38.3066	79.3987	32.8961	49.1726	58.2779	53.7895	46.7822	0.869727	-0.201365	0.662265	0.755375
ENSMUST00000071745.3	Rps4l	Rps4l-201	chr6:148354656-148355598	+	processed_transcript	28.2803	26.1856	18.9859	18.4247	18.2172	29.6687	24.4839	22.1035	0.902778	-0.147557	0.64023	0.736915
ENSMUST00000156194.2	Tfpt	Tfpt-205	chr7:3620779-3629579	-	processed_transcript	9.69584	14.7687	69.4825	42.5695	2.47571	66.8109	31.3157	37.2854	1.19063	0.251725	0.83464	0.888801
ENSMUST00000143722.7	Kmt5a	Kmt5a-207	chr5:124450171-124459792	+	processed_transcript	40.1398	85.4601	33.588	42.2666	43.0509	44.7287	53.0626	43.3487	0.816935	-0.291707	0.583848	0.688375
ENSMUST00000144154.1	Prpsap1	Prpsap1-206	chr11:116485531-116490327	-	processed_transcript	62.8433	97.9342	60.8126	60.7262	43.8566	99.1254	73.8634	67.9027	0.919302	-0.121389	0.783783	0.851013
ENSMUST00000142696.1	Itgb6	Itgb6-205	chr2:60693445-60705578	-	processed_transcript	48.2162	32.7602	34.7737	30.5003	27.4485	46.2639	38.5834	34.7376	0.900324	-0.151483	0.638791	0.7361
ENSMUST00000154843.7	Fus	Fus-210	chr7:127971875-127977271	+	processed_transcript	76.0836	67.9399	486.358	23.6944	627.55	118.735	210.127	256.66	1.22145	0.288594	0.851361	0.899006
ENSMUST00000131170.1	Psme3	Psme3-203	chr11:101319834-101322099	+	processed_transcript	37.0775	21.8756	31.8001	23.7839	26.4918	28.7441	30.2511	26.3399	0.870711	-0.199735	0.450441	0.569324
ENSMUST00000153920.1	Tom1l2	Tom1l2-211	chr11:60226715-60239176	-	processed_transcript	747.194	1016.76	825.969	590.557	985.881	752.69	863.309	776.376	0.899302	-0.153122	0.567962	0.673903
ENSMUST00000201688.3	Ubl3	Ubl3-206	chr5:148505978-148537590	-	processed_transcript	55.1747	48.1646	53.1091	41.1945	40.2477	59.227	52.1495	46.8897	0.899141	-0.153381	0.46478	0.582333
ENSMUST00000149078.1	Gm12676	Gm12676-201	chr4:97754168-97757389	-	processed_transcript	26.6061	28.8723	22.5996	15.3793	29.1311	26.8716	26.026	23.794	0.914239	-0.129357	0.655331	0.750354
ENSMUST00000224265.1	Malt1	Malt1-204	chr18:65430962-65460006	+	processed_transcript	34.5957	47.1729	46.2998	76.3255	107.651	6.33558	42.6895	63.4372	1.48602	0.571449	0.530117	0.639083
ENSMUST00000138873.7	Metap1d	Metap1d-204	chr2:71510258-71517152	+	processed_transcript	8.44286	39.0726	8.01586	1.64676	41.8949	26.3696	18.5104	23.3037	1.25895	0.332224	0.77384	0.842032
ENSMUST00000146061.7	Inpp5e	Inpp5e-206	chr2:26397297-26409203	-	processed_transcript	32.159	12.6252	20.726	1	95.245	60.512	21.8367	52.2523	2.39287	1.25874	0.339889	0.472505
ENSMUST00000151624.1	Cadm1	Cadm1-208	chr9:47530373-47814054	+	processed_transcript	21.7315	4.55062	40.5108	51.5244	1	53.2075	22.2643	35.244	1.58298	0.662642	0.552311	0.658279
ENSMUST00000128188.7	Adprhl2	Adprhl2-202	chr4:126316052-126321467	-	processed_transcript	89.4025	68.8509	62.5261	76.0314	50.4831	68.5273	73.5932	65.014	0.883424	-0.178822	0.482858	0.597993
ENSMUST00000129388.1	Ctcf	Ctcf-203	chr8:105637066-105663851	+	processed_transcript	49.7416	43.9022	49.7406	34.6765	51.4639	41.5599	47.7948	42.5668	0.890615	-0.167126	0.375419	0.505171
ENSMUST00000151580.2	Prr33	Prr33-202	chr7:142492750-142506498	-	lincRNA	233.023	169.403	132.244	113.13	156.373	200.978	178.223	156.827	0.879946	-0.184513	0.611082	0.712811
ENSMUST00000140047.7	Ppp2r2d	Ppp2r2d-204	chr7:138846860-138869802	+	processed_transcript	62.3144	41.1399	121.258	60.8375	54.0815	64.2045	74.904	59.7078	0.797125	-0.327123	0.563392	0.669585
ENSMUST00000134086.1	Ap5s1	Ap5s1-205	chr2:131210370-131213002	+	processed_transcript	48.9309	107.419	58.1667	48.0792	69.0091	62.5891	71.5055	59.8925	0.837593	-0.255679	0.577538	0.682532
ENSMUST00000123543.1	Ifitm10	Ifitm10-204	chr7:142371143-142372881	-	processed_transcript	21.6251	26.5172	27.3839	16.7771	12.5973	50.2722	25.1754	26.5488	1.05456	0.0766361	0.914793	0.940941
ENSMUST00000162204.7	Mroh1	Mroh1-216	chr15:76380513-76409581	+	processed_transcript	73.3134	54.7603	34.0491	28.0667	64.0839	51.2048	54.0409	47.7851	0.88424	-0.17749	0.706799	0.788322
ENSMUST00000188160.1	Gm29417	Gm29417-201	chr18:35830389-35831093	-	antisense_RNA	58.5068	77.6353	82.4462	61.3917	40.9214	100.417	72.8628	67.5767	0.927452	-0.108655	0.793806	0.857092
ENSMUST00000153186.7	Etfa	Etfa-204	chr9:55486737-55512120	-	processed_transcript	64.1498	11.4241	35.9855	8.61035	51.4945	40.0268	37.1865	33.3772	0.897564	-0.155914	0.857579	0.903488
ENSMUST00000143062.1	Gm16001	Gm16001-202	chr5:124111138-124112217	-	lincRNA	63.1511	74.2245	59.9303	56.5801	75.5445	43.9973	65.7686	58.7073	0.892634	-0.163859	0.524512	0.633387
ENSMUST00000137184.1	Gm14964	Gm14964-201	chr19:6530789-6531788	-	antisense_RNA	28.2842	133.021	35.3311	92.6346	22.6547	42.3248	65.5453	52.538	0.801553	-0.31913	0.759649	0.830717
ENSMUST00000139699.7	Exoc7	Exoc7-208	chr11:116288001-116306734	-	processed_transcript	47.2975	50.66	39.0636	213.123	9.46146	31.0134	45.6737	84.5325	1.85079	0.888142	0.580407	0.685119
ENSMUST00000204974.2	Firre	Firre-208	chrX:50559660-50591959	-	processed_transcript	51.465	39.2256	49.3195	36.0045	50.5926	36.4982	46.67	41.0318	0.879188	-0.185756	0.40707	0.532266
ENSMUST00000145839.1	Nf1	Nf1-207	chr11:79339693-79345186	+	processed_transcript	171.722	80.5599	133.286	48.5316	265.691	95.4625	128.523	136.562	1.06255	0.0875285	0.915386	0.941166
ENSMUST00000065731.4	2310001K24Rik	2310001K24Rik-201	chr2:163472545-163473003	+	antisense_RNA	42.2049	26.47	10.305	39.1824	29.894	6.51481	26.3266	25.1971	0.957094	-0.0632674	0.936817	0.956564
ENSMUST00000161221.7	Nos1ap	Nos1ap-205	chr1:170302668-170327654	-	processed_transcript	120.687	103.396	77.3448	70.3504	150.229	60.3549	100.476	93.6449	0.932013	-0.101578	0.836919	0.890662
ENSMUST00000144835.1	Vps13d	Vps13d-207	chr4:145016759-145051034	-	processed_transcript	26.296	91.4193	37.6644	36.5082	59.9298	27.2908	51.7932	41.2429	0.7963	-0.328616	0.660929	0.754877
ENSMUST00000125354.1	Gm14005	Gm14005-201	chr2:128372107-128428893	-	lincRNA	61.3278	78.7971	44.0013	34.7746	74.8928	53.7958	61.3754	54.4877	0.887778	-0.171729	0.676571	0.767004
ENSMUST00000162174.7	Aig1	Aig1-204	chr10:13653588-13844286	-	processed_transcript	84.4386	28.8659	48.411	30.7599	66.0819	38.1686	53.9052	45.0035	0.834864	-0.260387	0.671842	0.763705
ENSMUST00000213677.1	D830035M03Rik	D830035M03Rik-201	chr9:120490532-120492547	-	antisense_RNA	27.0677	19.5563	32.8232	14.2731	24.8295	32.2115	26.4824	23.7713	0.897626	-0.155813	0.696679	0.781882
ENSMUST00000220682.1	1700081N11Rik	1700081N11Rik-201	chr12:54862991-54863664	+	bidirectional_promoter_lncRNA	1	62.4179	31.6221	31.2048	1	41.5455	31.68	24.5834	0.775992	-0.365887	0.757921	0.829187
ENSMUST00000151771.1	Ppp1r9b	Ppp1r9b-203	chr11:94992880-95001326	+	processed_transcript	69.5129	47.0813	39.9741	36.6415	72.9539	32.1344	52.1894	47.2433	0.905227	-0.143649	0.768343	0.838586
ENSMUST00000160157.1	Lamtor4	Lamtor4-202	chr5:138255831-138259398	+	processed_transcript	58.3163	77.3426	50.1931	110.889	34.9167	38.3145	61.9506	61.3735	0.990684	-0.0135034	0.983386	0.988093
ENSMUST00000155341.1	AU040320	AU040320-211	chr4:126835279-126839747	+	processed_transcript	45.8444	27.3448	380.586	29.8687	73.2331	142.678	151.258	81.9264	0.541632	-0.884615	0.592598	0.695436
ENSMUST00000150905.1	Htra1	Htra1-204	chr7:130982730-130985396	+	processed_transcript	73.7415	113.241	109.69	60.4243	113.691	86.5899	98.8909	86.9017	0.878763	-0.186454	0.579178	0.683989
ENSMUST00000123761.7	Mast2	Mast2-206	chr4:116312291-116316076	-	processed_transcript	33.5309	58.6861	58.3444	66.278	34.0836	32.8141	50.1871	44.3919	0.884527	-0.177022	0.695214	0.78076
ENSMUST00000119599.2	Zfp597	Zfp597-202	chr16:3865290-3884561	-	processed_transcript	35.2548	50.3286	44.2803	39.0566	51.6025	25.1454	43.2879	38.6015	0.891739	-0.165306	0.622827	0.722829
ENSMUST00000206838.1	Gm45051	Gm45051-201	chr6:72347029-72348458	-	antisense_RNA	67.2711	54.9235	49.6323	58.9156	57.144	35.0933	57.2756	50.3843	0.879681	-0.184947	0.498748	0.611957
ENSMUST00000182981.7	Rian	Rian-213	chr12:109650681-109661025	+	lincRNA	64.4569	163.134	48.5946	58.9779	61.8532	89.951	92.0619	70.2607	0.76319	-0.389886	0.588998	0.692503
ENSMUST00000187975.1	Pcbp4	Pcbp4-209	chr9:106453845-106454836	+	processed_transcript	32.8445	47.8723	28.4956	30.4753	37.6661	25.064	36.4041	31.0685	0.853432	-0.228652	0.483231	0.598161
ENSMUST00000145086.7	Map1lc3a	Map1lc3a-202	chr2:155276543-155278070	+	processed_transcript	75.134	62.3031	91.7233	47.8267	84.228	68.4346	76.3868	66.8298	0.874886	-0.192833	0.519502	0.629298
ENSMUST00000200366.4	Shisa5	Shisa5-217	chr9:109054948-109056551	+	processed_transcript	39.092	38.3782	52.3688	32.1472	27.1317	57.7198	43.2797	38.9996	0.901106	-0.150232	0.704611	0.787276
ENSMUST00000150908.7	Galt	Galt-208	chr4:41755840-41757272	+	processed_transcript	209.896	226.923	210.841	77.6813	334.181	247.867	215.887	219.91	1.01863	0.0266356	0.960091	0.972054
ENSMUST00000160651.1	Pigk	Pigk-205	chr3:152763381-152766524	+	processed_transcript	24.9174	63.1342	77.9003	33.2228	32.884	71.6613	55.3173	45.9227	0.830169	-0.268524	0.668583	0.76103
ENSMUST00000153356.1	Iqsec2	Iqsec2-206	chrX:152178964-152204004	+	processed_transcript	35.853	17.6596	19.3157	10.8985	12.896	55.5843	24.2761	26.4596	1.08994	0.124254	0.896036	0.928472
ENSMUST00000131324.1	0610025J13Rik	0610025J13Rik-201	chr4:98321398-98322850	+	antisense_RNA	24.5872	26.758	46.4452	17.5729	33.3301	33.3171	32.5968	28.0734	0.861232	-0.215527	0.631022	0.729149
ENSMUST00000123607.1	Mtfp1	Mtfp1-202	chr11:4094434-4095140	-	processed_transcript	70.2777	68.5669	41.1009	63.7016	40.8581	48.4769	59.9818	51.0122	0.850461	-0.233683	0.48238	0.597842
ENSMUST00000217077.1	Gm9856	Gm9856-201	chr9:123018995-123021572	-	antisense_RNA	36.7747	29.7495	45.972	36.6638	20.5205	42.569	37.4987	33.2511	0.886726	-0.173439	0.627401	0.726799
ENSMUST00000141927.1	Efcab14	Efcab14-207	chr4:115766468-115775188	+	processed_transcript	37.9057	49.8066	67.4793	30.2736	106.125	25.1363	51.7305	53.845	1.04088	0.0577979	0.942518	0.960438
ENSMUST00000129054.7	Ublcp1	Ublcp1-202	chr11:44454573-44460830	-	processed_transcript	21.7197	43.148	24.1391	22.9817	23.9211	26.074	29.6689	24.3256	0.819902	-0.286477	0.478172	0.594089
ENSMUST00000136550.7	Cpne2	Cpne2-203	chr8:94533067-94549823	+	processed_transcript	20.7837	19.7545	15.3957	99.7074	5.00771	8.00327	18.6446	37.5728	2.01521	1.01093	0.575915	0.680775
ENSMUST00000174808.1	Malat1	Malat1-205	chr19:5795694-5796952	-	lincRNA	22.7924	31.154	43.0879	37.6656	21.9798	23.2305	32.3448	27.6253	0.854089	-0.227541	0.575287	0.680351
ENSMUST00000201062.1	Gm43050	Gm43050-201	chr5:119828448-119831920	-	lincRNA	191.518	208.643	191.031	187.419	171.022	149.591	197.064	169.344	0.859335	-0.218707	0.088874	0.180981
ENSMUST00000126685.1	Ncoa5	Ncoa5-205	chr2:165022672-165023213	-	processed_transcript	35.7495	57.2869	41.3565	44.3055	17.3679	68.845	44.7976	43.5061	0.971171	-0.0422031	0.940306	0.95896
ENSMUST00000133808.1	Tmem250-ps	Tmem250-ps-201	chr2:26136814-26140521	-	lincRNA	2188.96	2123.64	1897.2	1529.7	1896.68	1899.99	2069.93	1775.46	0.857737	-0.221392	0.123618	0.229896
ENSMUST00000126632.7	Map3k7	Map3k7-205	chr4:31981576-31992775	+	processed_transcript	54.9171	27.1373	39.7636	28.0736	37.8555	34.7154	40.606	33.5482	0.826188	-0.275459	0.454625	0.572744
ENSMUST00000128626.1	Eef1g	Eef1g-204	chr19:8968216-8972636	+	processed_transcript	37.3251	40.3976	41.2885	60.8288	33.1939	19.0506	39.6704	37.6911	0.950107	-0.0738378	0.880218	0.918884
ENSMUST00000181757.7	1700086O06Rik	1700086O06Rik-201	chr18:38238405-38250565	-	lincRNA	40.3623	23.9678	32.0715	27.8323	22.7011	30.3312	32.1339	26.9549	0.838831	-0.253548	0.378819	0.507712
ENSMUST00000152744.1	Myl2	Myl2-210	chr5:122103181-122106854	+	processed_transcript	3422.9	2968.81	2920.74	2333.07	2372.79	3305.84	3104.15	2670.57	0.860322	-0.217052	0.289985	0.420536
ENSMUST00000211445.1	Ankrd10	Ankrd10-208	chr8:11614963-11635036	-	processed_transcript	68.9589	44.2625	42.8285	35.4271	55.8901	40.668	52.0166	43.9951	0.845788	-0.241632	0.48625	0.601012
ENSMUST00000113886.2	Gm11131	Gm11131-201	chr17:35377021-35380292	-	antisense_RNA	42.2492	38.1698	38.7121	26.528	35.0178	41.3848	39.7104	34.3102	0.86401	-0.21088	0.295353	0.426602
ENSMUST00000145217.7	Prdm16	Prdm16-211	chr4:154323331-154334852	-	processed_transcript	90.0658	98.6442	74.4055	85.6248	69.3052	68.5791	87.7052	74.503	0.849471	-0.235363	0.217037	0.339786
ENSMUST00000160582.1	Luc7l2	Luc7l2-205	chr6:38551843-38585106	+	processed_transcript	58.8461	66.4098	88.4318	59.0301	52.487	68.4393	71.2292	59.9855	0.842147	-0.247856	0.324154	0.457961
ENSMUST00000133067.1	Eif4a1	Eif4a1-206	chr11:69667453-69668289	-	processed_transcript	45.4067	101.478	59.0848	67.5866	35.6965	69.0585	68.6567	57.4472	0.836732	-0.257163	0.606518	0.708143
ENSMUST00000137668.1	Zfp974	Zfp974-203	chr7:27925753-27929460	-	processed_transcript	28.0339	32.1983	24.4871	28.9707	25.6571	18.194	28.2397	24.2739	0.859566	-0.21832	0.365474	0.499527
ENSMUST00000126503.1	Nup160	Nup160-202	chr2:90732724-90735784	+	processed_transcript	39.4122	16.3036	17.6111	1	85.6146	80.6979	24.4423	55.7708	2.28173	1.19013	0.332296	0.466065
ENSMUST00000142420.1	Hp1bp3	Hp1bp3-210	chr4:138216600-138221657	+	processed_transcript	60.5936	54.583	28.1685	46.4234	27.2206	44.8177	47.7817	39.4872	0.82641	-0.275071	0.517679	0.628299
ENSMUST00000144978.1	Mdh1	Mdh1-203	chr11:21559522-21564207	-	processed_transcript	41.1436	93.5927	79.085	92.589	37.6526	53.0281	71.2738	61.0899	0.857116	-0.222437	0.676047	0.767273
ENSMUST00000135162.1	Elovl1	Elovl1-205	chr4:118428130-118428830	+	processed_transcript	32.8859	60.7781	61.2824	48.8266	37.4065	40.6673	51.6488	42.3001	0.818995	-0.288074	0.401854	0.527498
ENSMUST00000126709.1	Vwf	Vwf-204	chr6:125566251-125578578	+	processed_transcript	25.1116	29.2388	16.322	26.8816	7.36305	36.6747	23.5575	23.6398	1.00349	0.00503143	0.993447	0.994632
ENSMUST00000223204.1	2010111I01Rik	2010111I01Rik-228	chr13:63272816-63299668	+	processed_transcript	56.4872	231.485	57.4802	41.1784	123.566	89.3298	115.151	84.6914	0.735481	-0.443239	0.653451	0.748711
ENSMUST00000153967.1	Emc4	Emc4-202	chr2:112363793-112368020	-	processed_transcript	34.6763	25.7528	41.6591	11.3506	52.8967	37.4328	34.0294	33.8934	0.996003	-0.00577827	0.992133	0.993909
ENSMUST00000133106.1	Galt	Galt-205	chr4:41756262-41757778	+	processed_transcript	18.1244	115.309	15.4807	15.3781	19.5246	65.0677	49.6381	33.3235	0.671328	-0.57491	0.678011	0.7676
ENSMUST00000151921.7	E130307A14Rik	E130307A14Rik-210	chr10:39621414-39732006	-	antisense_RNA	61.0967	82.5919	83.722	66.7815	46.7231	81.7364	75.8035	65.0804	0.85854	-0.220042	0.44043	0.561602
ENSMUST00000146938.1	Gm16124	Gm16124-201	chr9:53667246-53681265	+	antisense_RNA	169.706	113.933	153.927	103.763	128.905	133.831	145.855	122.166	0.837586	-0.255691	0.28118	0.4112
ENSMUST00000132738.1	Gnptab	Gnptab-204	chr10:88429566-88433288	+	processed_transcript	34.277	100.623	27.6582	35.5594	45.8851	35.0853	54.1861	38.8433	0.716849	-0.480259	0.550453	0.656685
ENSMUST00000131956.7	Slc9a8	Slc9a8-206	chr2:167421732-167476999	+	processed_transcript	85.2303	1	42.8989	36.2984	1	60.4374	43.0431	32.5786	0.756884	-0.401856	0.743331	0.817129
ENSMUST00000187421.6	1810026B05Rik	1810026B05Rik-206	chr7:73544264-73557973	-	lincRNA	261.967	300.211	254.982	218.015	255.559	215.889	272.387	229.821	0.84373	-0.245147	0.0893866	0.181731
ENSMUST00000143014.1	Plxnb2	Plxnb2-205	chr15:89155549-89156579	-	processed_transcript	42.8764	69.3043	89.9766	69.1634	54.2887	42.709	67.3857	55.387	0.82194	-0.282895	0.485585	0.600485
ENSMUST00000217759.1	Palm	Palm-203	chr10:79806018-79807671	+	processed_transcript	141.714	115.49	140.892	109.858	77.383	162.324	132.699	116.522	0.878093	-0.187555	0.570359	0.67611
ENSMUST00000133571.1	Soga1	Soga1-202	chr2:157037050-157040239	-	processed_transcript	37.2036	39.8318	17.4192	26.0882	28.9906	20.4033	31.4849	25.1607	0.799136	-0.323487	0.447123	0.567264
ENSMUST00000211472.1	Ppp1r3b	Ppp1r3b-203	chr8:35376660-35379526	+	processed_transcript	34.4323	30.7293	29.2818	16.6139	24.5604	45.2636	31.4811	28.8126	0.915235	-0.127786	0.773755	0.842121
ENSMUST00000147547.1	Med27	Med27-204	chr2:29504871-29524681	+	processed_transcript	47.0954	9.7685	18.9973	75.9988	1	68.498	25.2871	48.4989	1.91794	0.939554	0.42824	0.550516
ENSMUST00000142593.7	Bnip3l	Bnip3l-206	chr14:66989425-67000508	-	processed_transcript	84.2985	30.1812	77.0988	83.8094	23.5805	59.0794	63.8595	55.4898	0.868936	-0.202679	0.748455	0.820613
ENSMUST00000162910.1	Rbm20	Rbm20-203	chr19:53793308-53813573	+	processed_transcript	387.046	363.918	405.003	272.579	299.235	414.541	385.322	328.785	0.853272	-0.228922	0.278774	0.409107
ENSMUST00000146721.1	Ndufaf4	Ndufaf4-202	chr4:24898131-24903505	+	processed_transcript	134.423	121.278	130.425	73.2348	129.942	132.201	128.708	111.793	0.868572	-0.203282	0.438467	0.560233
ENSMUST00000195402.1	Il1r1	Il1r1-203	chr1:40266657-40277178	+	processed_transcript	56.5969	34.3425	23.4675	8.427	76.4623	41.6525	38.1356	42.1806	1.10607	0.145441	0.862625	0.906909
ENSMUST00000125001.8	Ptpmt1	Ptpmt1-203	chr2:90908716-90917857	-	processed_transcript	40.0288	24.1053	27.4882	10.8801	40.3089	35.5626	30.5408	28.9172	0.946839	-0.0788089	0.882704	0.920717
ENSMUST00000131279.1	Tpm1	Tpm1-219	chr9:67033778-67049191	-	processed_transcript	8788.52	10361.8	9077.77	6833.2	7284.66	9758.38	9409.37	7958.75	0.845832	-0.241557	0.231707	0.356984
ENSMUST00000141921.1	Ttbk2	Ttbk2-205	chr2:120790340-120850435	-	processed_transcript	27.3874	57.8301	33.4283	35.3112	45.7245	19.2328	39.5486	33.4228	0.845108	-0.242792	0.638813	0.735957
ENSMUST00000143899.1	Ndel1	Ndel1-205	chr11:68822110-68839920	-	processed_transcript	168.539	346.175	435.891	175.756	324.49	260.87	316.868	253.705	0.800665	-0.320729	0.519711	0.629249
ENSMUST00000152899.1	Otud5	Otud5-209	chrX:7841364-7842008	+	processed_transcript	99.3318	105.923	113.055	76.4073	85.1646	106.183	106.103	89.2515	0.841178	-0.249518	0.156773	0.271697
ENSMUST00000176830.1	Mettl25	Mettl25-203	chr10:105839205-105841211	-	processed_transcript	29.4896	25.6967	33.372	18.3605	44.4835	17.9701	29.5194	26.938	0.912552	-0.132022	0.789596	0.855113
ENSMUST00000228265.1	Ppp3cc	Ppp3cc-202	chr14:70222977-70289450	-	processed_transcript	203.15	237.282	140.878	177.764	73.4114	301.715	193.77	184.297	0.951111	-0.072315	0.901359	0.931879
ENSMUST00000198262.1	Gm31678	Gm31678-201	chr3:137795265-137803469	-	lincRNA	27.6892	60.4797	28.263	14.2252	44.7278	43.0371	38.8106	33.9967	0.875964	-0.191056	0.759352	0.830572
ENSMUST00000145328.1	Sertad2	Sertad2-204	chr11:20543253-20597020	+	processed_transcript	39.4718	54.5604	52.2852	57.1585	26.791	42.4174	48.7724	42.1223	0.863649	-0.211483	0.540349	0.647853
ENSMUST00000149172.1	A930006K02Rik	A930006K02Rik-201	chr16:91465104-91470121	+	processed_transcript	34.6869	52.9963	37.4808	29.4573	33.3194	40.4917	41.7213	34.4228	0.825065	-0.27742	0.327495	0.461646
ENSMUST00000127292.1	Tomm22	Tomm22-202	chr15:79671091-79672680	+	processed_transcript	234.348	182.009	235.766	188.256	170.342	180.527	217.374	179.708	0.826723	-0.274525	0.110508	0.212253
ENSMUST00000124938.1	Ssfa2	Ssfa2-204	chr2:79635461-79636434	+	processed_transcript	139.055	164.44	138.505	174.011	93.2966	112.246	147.333	126.518	0.85872	-0.219741	0.465445	0.583022
ENSMUST00000125855.7	Slc9a8	Slc9a8-205	chr2:167450966-167467724	+	processed_transcript	58.4402	98.2144	74.5314	36.7945	73.2665	91.0931	77.062	67.0514	0.870097	-0.200753	0.638379	0.735962
ENSMUST00000124092.1	Ube2j2	Ube2j2-207	chr4:155956005-155957483	+	processed_transcript	57.9045	14.7953	35.5896	131.604	4.24897	31.2049	36.0965	55.686	1.5427	0.625457	0.655428	0.750294
ENSMUST00000226066.1	AC090962.1	AC090962.1-201	chr14:63329220-63345635	+	lincRNA	48.5621	55.4025	46.5272	28.4799	48.3277	51.8676	50.1639	42.8917	0.855031	-0.225951	0.401592	0.527293
ENSMUST00000154682.7	6530402F18Rik	6530402F18Rik-202	chr2:29250910-29253006	-	processed_transcript	27.8081	36.1536	29.4851	23.7003	34.2977	20.7644	31.149	26.2541	0.842857	-0.24664	0.368729	0.502205
ENSMUST00000154912.1	Dnajc10	Dnajc10-205	chr2:80347654-80350942	+	processed_transcript	30.6972	19.0989	67.302	59.809	21.4168	17.5036	39.0327	32.9098	0.843133	-0.246168	0.772891	0.841544
ENSMUST00000208578.1	Gm45148	Gm45148-201	chr7:6179975-6183561	+	sense_intronic	39.9079	37.4524	28.1953	33.7822	20.0728	35.2889	35.1852	29.7146	0.844521	-0.243795	0.414344	0.53884
ENSMUST00000179908.7	Rab10os	Rab10os-206	chr12:3235832-3239234	+	antisense_RNA	55.8024	24.0114	44.5696	40.6942	37.5153	22.1642	41.4612	33.4579	0.80697	-0.309414	0.504457	0.617008
ENSMUST00000134273.1	Gatb	Gatb-205	chr3:85574132-85576041	+	processed_transcript	27.4272	22.1182	33.8745	68.4878	10.9325	15.5425	27.8067	31.6543	1.13837	0.18697	0.847631	0.89657
ENSMUST00000129506.1	Notch1	Notch1-204	chr2:26469825-26470498	-	processed_transcript	25.1239	22.0818	30.2262	42.2132	10.9308	20.5784	25.8106	24.5741	0.952092	-0.0708277	0.903218	0.933227
ENSMUST00000181640.1	Lppos	Lppos-201	chr16:24391612-24393588	-	lincRNA	340.123	339.096	329.183	243.252	268.793	328.633	336.134	280.226	0.833675	-0.262444	0.093802	0.188427
ENSMUST00000148503.7	Slc38a10	Slc38a10-212	chr11:120105678-120108588	-	processed_transcript	153.921	989.477	182.489	286.179	176.269	311.37	441.962	257.939	0.583623	-0.776891	0.542817	0.649575
ENSMUST00000127547.1	Nkiras2	Nkiras2-204	chr11:100622920-100624878	+	processed_transcript	42.3203	130.668	44.6129	54.5381	62.1053	41.0633	72.5339	52.5689	0.72475	-0.464445	0.53852	0.646583
ENSMUST00000155937.1	Dpf2	Dpf2-209	chr19:5911826-5912807	-	processed_transcript	50.932	82.2113	69.9061	66.4333	51.9642	47.6424	67.6831	55.3466	0.817732	-0.290301	0.314178	0.447127
ENSMUST00000150386.7	Ppa2	Ppa2-205	chr3:133338936-133367929	+	processed_transcript	140.554	111.864	347.778	289.504	60.8937	173.752	200.065	174.717	0.873298	-0.195454	0.811271	0.870169
ENSMUST00000167285.7	Usf2	Usf2-205	chr7:30945252-30956176	-	processed_transcript	172.327	143.719	172.816	89.9586	181.924	146.307	162.954	139.397	0.855435	-0.22527	0.454157	0.572297
ENSMUST00000126671.1	Stk38	Stk38-205	chr17:28973092-28974719	-	processed_transcript	77.0179	73.88	78.0009	72.9744	30.7177	110.765	76.2996	71.4856	0.936907	-0.0940221	0.845449	0.895766
ENSMUST00000183087.1	Bvht	Bvht-202	chr18:61639653-61647472	+	lincRNA	317.868	240.489	355.007	213.097	267.834	265.137	304.454	248.689	0.816836	-0.291881	0.217589	0.340333
ENSMUST00000126458.1	Ebna1bp2	Ebna1bp2-202	chr4:118621226-118625618	+	processed_transcript	80.4084	69.9105	67.1753	129.51	20.7196	78.4565	72.4981	76.2287	1.05146	0.0723917	0.911942	0.938966
ENSMUST00000134239.1	Blcap	Blcap-204	chr2:157558188-157560007	-	processed_transcript	121.119	94.7582	96.7077	67.4798	83.7257	109.165	104.195	86.7903	0.83296	-0.263681	0.304847	0.436808
ENSMUST00000218555.1	Gm30025	Gm30025-201	chr12:80435209-80435936	+	antisense_RNA	100.765	129.785	86.3801	79.0977	78.7477	100.676	105.643	86.1737	0.815704	-0.293883	0.255438	0.38369
ENSMUST00000146010.2	Epb41l4aos	Epb41l4aos-201	chr18:33794892-33795986	+	lincRNA	428.795	435.707	468.502	352.218	315.909	436.52	444.335	368.216	0.82869	-0.271096	0.114071	0.217933
ENSMUST00000142141.1	Ggnbp1	Ggnbp1-204	chr17:27018040-27022517	+	processed_transcript	990.233	1276.63	970.817	777.36	954.784	916.298	1079.23	882.814	0.818007	-0.289814	0.156022	0.270674
ENSMUST00000152733.1	Ybx1	Ybx1-207	chr4:119293624-119294500	-	processed_transcript	37.7848	40.4741	87.0029	43.6702	60.981	27.6676	55.0873	44.1063	0.800661	-0.320736	0.587622	0.691692
ENSMUST00000179138.1	Epb41l4aos	Epb41l4aos-202	chr18:33794939-33795969	+	lincRNA	68.8438	24.7183	63.6895	45.6816	44.0492	29.791	52.4172	39.8406	0.760067	-0.395802	0.443756	0.564842
ENSMUST00000126519.1	Rpl22	Rpl22-202	chr4:152327067-152330046	+	processed_transcript	63.7748	47.7016	61.5423	53.8957	41.3305	46.4499	57.6729	47.2254	0.818849	-0.288331	0.167853	0.284059
ENSMUST00000157003.7	Aco2	Aco2-206	chr15:81872484-81889689	+	processed_transcript	92.0569	98.8379	248.678	100.408	194.339	63.9957	146.524	119.581	0.816118	-0.29315	0.696239	0.781737
ENSMUST00000199483.4	Gbp8	Gbp8-204	chr5:105014150-105022064	-	processed_transcript	47.8837	50.8449	1	47.0232	28.5516	1	33.2429	25.5249	0.767832	-0.381137	0.731399	0.807183
ENSMUST00000126489.1	Cops3	Cops3-203	chr11:59817795-59818687	-	processed_transcript	47.3066	36.7923	158.08	87.2972	20.3748	85.2874	80.7263	64.3198	0.796763	-0.327777	0.731558	0.807181
ENSMUST00000139014.1	2900052L18Rik	2900052L18Rik-201	chr11:120229802-120231585	-	processed_transcript	90.5464	75.9809	98.1506	54.3192	73.2239	93.5241	88.226	73.6891	0.835231	-0.259753	0.3279	0.461828
ENSMUST00000137910.1	Slc23a2	Slc23a2-205	chr2:132060708-132067040	-	processed_transcript	36.8326	40.0935	34.7522	40.639	28.4957	24.3935	37.2261	31.1761	0.837479	-0.255876	0.302727	0.434636
ENSMUST00000187351.1	Gm28967	Gm28967-201	chr6:125186361-125186641	-	sense_intronic	1125.93	18816.4	20842.7	634.528	20314.8	18819.3	13595	13256.2	0.975078	-0.0364108	0.971459	0.979234
ENSMUST00000132956.7	Lsp1	Lsp1-208	chr7:142474994-142486504	+	processed_transcript	908.721	679.103	609.425	714.14	600.549	480.013	732.416	598.234	0.816795	-0.291954	0.300346	0.431833
ENSMUST00000152141.1	Tspan18	Tspan18-203	chr2:93311263-93334505	-	processed_transcript	62.0152	61.4408	64.4438	23.4882	67.8944	84.2525	62.6333	58.545	0.934727	-0.0973826	0.833067	0.887688
ENSMUST00000153345.1	Klhl13	Klhl13-207	chrX:23248225-23365053	-	processed_transcript	26.4174	52.6589	37.5193	44.7963	13.3155	47.8469	38.8652	35.3196	0.908771	-0.138011	0.804445	0.865427
ENSMUST00000215592.1	Ubl7	Ubl7-204	chr9:57911008-57920561	+	processed_transcript	56.8693	33.1467	2.25951	105.283	1	22.032	30.7585	42.7716	1.39056	0.475668	0.752405	0.824406
ENSMUST00000167495.7	Acin1	Acin1-225	chr14:54645211-54650268	-	processed_transcript	360.114	321.8	301.532	264.063	198.973	362.149	327.815	275.062	0.839075	-0.253128	0.354651	0.488579
ENSMUST00000131900.1	AU040320	AU040320-205	chr4:126753814-126788334	+	processed_transcript	29.9909	2.02431	59.2526	1	87.7963	22.2989	30.4226	37.0317	1.21724	0.283619	0.841113	0.893051
ENSMUST00000136466.7	Ppie	Ppie-203	chr4:123127320-123136898	-	processed_transcript	1	1.01119	136.5	73.0213	1.00593	1.01961	46.1705	25.0156	0.541809	-0.884143	0.700373	0.78463
ENSMUST00000153855.1	9530068E07Rik	9530068E07Rik-204	chr11:52396428-52404242	+	processed_transcript	90.6715	53.5893	79.3826	8.49695	67.2713	364.998	74.5478	146.922	1.97084	0.978813	0.549596	0.655973
ENSMUST00000125421.7	Fuom	Fuom-204	chr7:140101155-140101966	-	processed_transcript	28.0001	14.7098	33.8236	5.72284	44.3913	29.6495	25.5111	26.5879	1.04221	0.0596403	0.936043	0.956355
ENSMUST00000221825.1	Gpr137b-ps	Gpr137b-ps-204	chr13:12617340-12650380	-	processed_transcript	46.3292	43.119	25.3258	22.6653	36.0664	33.4119	38.258	30.7145	0.802826	-0.316841	0.383309	0.512911
ENSMUST00000141531.7	Trim47	Trim47-206	chr11:116105752-116108119	-	processed_transcript	307.972	343.807	117.555	167.396	211.33	189.06	256.445	189.262	0.738022	-0.438265	0.399696	0.526449
ENSMUST00000132585.1	Slc41a1	Slc41a1-202	chr1:131827493-131830276	+	processed_transcript	78.1365	129.824	16.0645	19.076	38.3579	119.643	74.675	59.0257	0.790435	-0.339282	0.745908	0.819247
ENSMUST00000142128.1	4930402H24Rik	4930402H24Rik-210	chr2:130803746-130814292	-	processed_transcript	49.9775	49.2989	71.337	33.7497	82.0204	34.1025	56.8711	49.9575	0.878434	-0.186995	0.71432	0.795127
ENSMUST00000129897.7	Pxn	Pxn-205	chr5:115516355-115544883	+	processed_transcript	23.02	46.2993	26.7222	23.8318	21.1439	30.3113	32.0138	25.0956	0.7839	-0.351258	0.420713	0.544172
ENSMUST00000228941.1	Ankrd46	Ankrd46-205	chr15:36495942-36496715	-	processed_transcript	35.6733	17.1574	7.44672	1	37.5419	64.8838	20.0925	34.4752	1.71583	0.778906	0.517208	0.62803
ENSMUST00000126791.1	Kcnh2	Kcnh2-203	chr5:24324490-24325789	-	processed_transcript	60.664	104.438	70.2079	79.5242	33.5877	88.5429	78.4367	67.2183	0.856975	-0.222675	0.630768	0.729022
ENSMUST00000189571.1	Tns1	Tns1-214	chr1:73992100-73998468	-	processed_transcript	37.7615	49.7829	35.4218	8.1733	61.9124	69.9518	40.9887	46.6792	1.13883	0.187552	0.789072	0.854913
ENSMUST00000201201.1	Gm43480	Gm43480-201	chr5:134298798-134299213	-	sense_intronic	92.3419	44.6945	76.0923	44.4498	50.9997	73.3022	71.0429	56.2505	0.791782	-0.336824	0.42033	0.543817
ENSMUST00000194163.1	Map4k4	Map4k4-214	chr1:39964850-39976746	+	processed_transcript	29.5152	33.1601	38.5423	23.4559	19.7918	42.9144	33.7392	28.7207	0.851256	-0.232335	0.5471	0.653924
ENSMUST00000193040.2	Gm38336	Gm38336-201	chr1:34809360-34811908	-	antisense_RNA	31.462	34.592	24.6192	21.3248	18.0619	36.7336	30.2244	25.3734	0.839501	-0.252396	0.494895	0.608562
ENSMUST00000152050.1	Dmpk	Dmpk-217	chr7:19087493-19088631	+	processed_transcript	87.1505	97.7985	95.9879	67.2462	107.179	59.7255	93.6456	78.0503	0.833464	-0.262808	0.359712	0.493661
ENSMUST00000150138.1	Hectd2os	Hectd2os-208	chr19:36643546-36658584	-	processed_transcript	145.471	115.37	155.357	111.352	190.853	64.536	138.732	122.247	0.881172	-0.182504	0.692642	0.779086
ENSMUST00000204484.2	Zfp862-ps	Zfp862-ps-204	chr6:48504388-48534832	+	processed_transcript	75.4147	61.3585	67.7713	43.6995	71.5095	52.6229	68.1815	55.944	0.820516	-0.285397	0.252045	0.380067
ENSMUST00000128881.1	Casz1	Casz1-203	chr4:148804465-148839746	+	processed_transcript	97.3731	83.8238	89.8422	52.9152	85.6081	84.8684	90.3464	74.4639	0.824204	-0.278926	0.238275	0.364983
ENSMUST00000138952.7	Lrrc41	Lrrc41-204	chr4:116076885-116088598	+	processed_transcript	25.7166	53.1027	30.079	18.6775	29.7862	38.5481	36.2994	29.0039	0.799019	-0.323699	0.516241	0.627157
ENSMUST00000214716.1	Wdr48	Wdr48-203	chr9:119895157-119904368	+	processed_transcript	28.4294	45.3716	35.2861	26.7864	43.9845	20.1215	36.3624	30.2975	0.83321	-0.263248	0.521655	0.631299
ENSMUST00000186472.1	1810044D09Rik	1810044D09Rik-201	chr6:91440987-91441755	+	lincRNA	179.339	198.743	204.791	132.941	188.131	151.768	194.291	157.613	0.811224	-0.301828	0.110169	0.211925
ENSMUST00000044683.11	Nlrp5-ps	Nlrp5-ps-201	chr7:14530652-14622479	-	processed_transcript	104.519	108.302	80.6542	71.4539	54.9148	120.546	97.8253	82.305	0.841347	-0.249227	0.510767	0.62276
ENSMUST00000151843.7	Mib2	Mib2-208	chr4:155654682-155667109	-	processed_transcript	105.868	118.942	117.313	79.1956	71.2849	135.379	114.041	95.2866	0.835547	-0.259207	0.413922	0.538569
ENSMUST00000129044.7	Eif4a3	Eif4a3-203	chr11:119288364-119289010	-	processed_transcript	18.1288	131.178	43.6712	33.6522	63.3141	25.179	64.3261	40.7151	0.632949	-0.659839	0.549089	0.655679
ENSMUST00000139938.1	Pygb	Pygb-204	chr2:150789006-150814001	+	processed_transcript	106.077	55.4053	55.0007	39.3635	74.385	56.967	72.161	56.9051	0.788586	-0.34266	0.482816	0.598235
ENSMUST00000142712.1	2410080I02Rik	2410080I02Rik-201	chr19:23134900-23135717	+	lincRNA	43.3308	22.6105	80.8008	35.7248	17.5686	65.0787	48.9141	39.4574	0.806667	-0.309955	0.688718	0.776407
ENSMUST00000195505.1	Fpgt	Fpgt-206	chr3:155091410-155093227	-	processed_transcript	41.2428	38.4661	42.2624	19.838	43.3471	39.992	40.6571	34.3924	0.845913	-0.241419	0.446519	0.56664
ENSMUST00000133762.1	Mindy1	Mindy1-203	chr3:95291986-95296161	+	processed_transcript	54.8911	82.1708	116.049	79.6463	71.6725	46.9644	84.3701	66.0944	0.783387	-0.352204	0.417626	0.541709
ENSMUST00000181267.1	Gm26795	Gm26795-202	chr8:28593532-28594308	+	lincRNA	54.9682	27.9704	45.3889	28.8104	35.0597	35.3333	42.7758	33.0678	0.773049	-0.371369	0.301202	0.43294
ENSMUST00000185946.6	AV026068	AV026068-203	chr8:57304265-57320325	-	antisense_RNA	41.1466	201.951	169.629	69.4369	120.213	86.1731	137.576	91.9411	0.668294	-0.581444	0.424222	0.546607
ENSMUST00000139202.1	Zmynd8	Zmynd8-210	chr2:165845744-165852122	-	processed_transcript	108.502	87.7406	121.036	120.969	59.1797	82.0794	105.76	87.4094	0.826491	-0.274929	0.420945	0.544333
ENSMUST00000156196.1	Gas2l1	Gas2l1-207	chr11:5060470-5064851	-	processed_transcript	102.784	92.2037	86.102	74.2332	88.7264	63.1125	93.6965	75.3574	0.804271	-0.314246	0.107623	0.20838
ENSMUST00000174847.7	Ndufa7	Ndufa7-209	chr17:33829124-33838309	+	processed_transcript	115.947	51.5401	128.674	7.57373	117.894	438.472	98.7202	187.98	1.90417	0.929162	0.534278	0.642869
ENSMUST00000155949.1	6530402F18Rik	6530402F18Rik-203	chr2:29245107-29252993	-	processed_transcript	135.212	158.038	129.394	93.9232	131.062	114.247	140.882	113.077	0.802641	-0.317173	0.115034	0.21919
ENSMUST00000155655.7	Map4k2	Map4k2-222	chr19:6352620-6355442	+	processed_transcript	37.421	46.4073	39.6536	26.1862	45.7867	29.1907	41.1607	33.7212	0.819258	-0.28761	0.326965	0.461027
ENSMUST00000204613.1	Aak1	Aak1-208	chr6:86959113-86995895	+	processed_transcript	147.429	130.296	76.0146	47.6702	151.309	101.862	117.913	100.28	0.850459	-0.233687	0.6574	0.751868
ENSMUST00000154112.1	Tmem8b	Tmem8b-208	chr4:43689690-43690496	+	processed_transcript	31.741	40.4514	19.0655	19.5506	42.953	14.6657	30.4193	25.7231	0.845619	-0.241921	0.683743	0.771834
ENSMUST00000148073.1	Ehd4	Ehd4-202	chr2:120122447-120154462	-	processed_transcript	497.052	723.86	492.521	740.092	443.577	270.575	571.145	484.748	0.848731	-0.236621	0.611244	0.712836
ENSMUST00000145697.7	Caprin1	Caprin1-211	chr2:103779524-103796544	-	processed_transcript	132.998	144.506	121.418	61.2846	138.828	137.295	132.974	112.469	0.8458	-0.241611	0.481484	0.597173
ENSMUST00000127892.1	Popdc2	Popdc2-203	chr16:38369426-38377763	+	processed_transcript	70.514	53.1955	74.5207	65.1588	32.5049	65.9039	66.0767	54.5225	0.82514	-0.27729	0.418028	0.542092
ENSMUST00000171190.1	2900005J15Rik	2900005J15Rik-202	chr5:25100983-25103007	+	processed_transcript	35.2781	19.9185	33.8233	19.1498	18.3039	33.8238	29.6733	23.7591	0.800691	-0.320682	0.447244	0.567275
ENSMUST00000190040.1	Gm28523	Gm28523-201	chr6:141246920-141250009	-	antisense_RNA	79.7361	97.2344	92.9081	69.4321	71.4672	72.2866	89.9595	71.062	0.789933	-0.340199	0.0238957	0.072741
ENSMUST00000189096.1	G730003C15Rik	G730003C15Rik-202	chr1:59119833-59122141	+	antisense_RNA	33.5957	37.8454	29.2942	27.514	26.2059	25.7204	33.5784	26.4801	0.788605	-0.342625	0.0483113	0.117638
ENSMUST00000189169.6	AV026068	AV026068-210	chr8:57304265-57320735	-	antisense_RNA	55.9256	197.324	63.8739	59.0088	77.6419	76.4241	105.708	71.0249	0.6719	-0.573682	0.49509	0.608654
ENSMUST00000135132.1	Gm11967	Gm11967-201	chr11:5915315-5916731	+	antisense_RNA	271.015	189.029	202.627	191.705	203.158	132.318	220.89	175.727	0.795539	-0.329996	0.24947	0.377427
ENSMUST00000153374.1	Acads	Acads-204	chr5:115111996-115119310	-	processed_transcript	51.3406	23.833	28.5358	27.7456	49.7335	12.5408	34.5698	30.0067	0.868002	-0.20423	0.756435	0.827921
ENSMUST00000211208.1	Gm26881	Gm26881-203	chr4:43046042-43053254	+	antisense_RNA	184.837	206.179	127.218	139.733	131.716	130.174	172.745	133.874	0.774982	-0.367765	0.177296	0.293725
ENSMUST00000180775.1	Fam120aos	Fam120aos-201	chr13:48968287-48972031	+	lincRNA	305.31	277.215	265.662	225.917	205.201	239.636	282.729	223.585	0.79081	-0.338596	0.0186568	0.0620826
ENSMUST00000136754.1	Mterf4	Mterf4-204	chr1:93301428-93302902	-	processed_transcript	12.3051	1	18.6865	113.577	1	1	10.6639	38.5256	3.61272	1.85308	0.502821	0.615604
ENSMUST00000204139.1	Aak1	Aak1-206	chr6:86967354-86996218	+	processed_transcript	92.6584	170.067	149.138	182.206	53.4506	119.189	137.288	118.282	0.86156	-0.214977	0.686544	0.774302
ENSMUST00000181850.2	9330151L19Rik	9330151L19Rik-201	chr12:69197211-69199867	+	bidirectional_promoter_lncRNA	119.886	123.999	104.326	74.1375	101.108	102.155	116.07	92.467	0.796647	-0.327988	0.0974444	0.194118
ENSMUST00000133922.7	Tax1bp3	Tax1bp3-203	chr11:73177251-73180685	+	processed_transcript	41.0617	21.7694	74.4004	23.9285	14.723	93.1983	45.7439	43.95	0.960784	-0.0577155	0.953882	0.967712
ENSMUST00000164669.3	Fam3c	Fam3c-204	chr6:22308460-22329456	-	processed_transcript	34.1054	25.9252	52.3036	40.1159	42.2894	13.45	37.4447	31.9517	0.853303	-0.228869	0.673736	0.765339
ENSMUST00000129188.1	Rere	Rere-203	chr4:150281812-150282466	+	processed_transcript	40.9136	100.431	61.1875	49.7882	30.449	81.5012	67.5108	53.9128	0.79858	-0.324491	0.585363	0.689354
ENSMUST00000144811.1	Zfp125	Zfp125-202	chr12:20877084-20921262	-	processed_transcript	30.0979	78.0598	72.1897	41.2478	62.1756	32.4841	60.1158	45.3025	0.753587	-0.408154	0.44459	0.565475
ENSMUST00000124388.1	Nemp1	Nemp1-204	chr10:127667123-127668851	+	processed_transcript	105.532	78.0754	45.1336	63.5085	38.2888	74.8492	76.247	58.8822	0.772256	-0.372849	0.445326	0.566268
ENSMUST00000207161.1	Gm5601	Gm5601-202	chr7:119739926-119742226	+	processed_transcript	585.826	440.243	524.372	590.871	345.364	324.326	516.814	420.187	0.813033	-0.298613	0.368403	0.502304
ENSMUST00000138046.7	Alkbh3	Alkbh3-209	chr2:93996178-94010431	-	processed_transcript	68.1262	103.975	51.2206	53.2934	55.4934	59.7727	74.4407	56.1865	0.754782	-0.405869	0.308754	0.440777
ENSMUST00000146979.1	Canx	Canx-202	chr11:50296199-50299378	-	processed_transcript	25.6355	39.4937	30.705	29.0815	23.4759	22.1762	31.9447	24.9112	0.779821	-0.358785	0.19855	0.318769
ENSMUST00000123373.1	Slc25a10	Slc25a10-202	chr11:120491915-120496916	+	processed_transcript	37.9642	110.032	54.2636	111.763	27.6373	35.7299	67.4201	58.3768	0.865866	-0.207784	0.806473	0.867238
ENSMUST00000150919.1	Cap1	Cap1-206	chr4:122862416-122864632	-	processed_transcript	64.763	81.0918	90.2385	86.657	34.1268	78.0083	78.6978	66.264	0.842006	-0.248097	0.525246	0.634122
ENSMUST00000161375.1	Polrmt	Polrmt-208	chr10:79743667-79746573	-	processed_transcript	30.5927	31.8848	28.0591	11.5021	22.922	50.5082	30.1789	28.3108	0.938099	-0.0921881	0.880196	0.919052
ENSMUST00000126558.7	Ppie	Ppie-202	chr4:123127701-123139025	-	processed_transcript	98.9615	58.1464	59.1509	35.3175	43.1119	108.559	72.0863	62.3293	0.864649	-0.209813	0.734546	0.809238
ENSMUST00000139173.1	Anks1	Anks1-204	chr17:28007585-28062599	+	processed_transcript	469.101	410.745	415.562	253.702	369.118	414.925	431.802	345.915	0.801095	-0.319954	0.17058	0.28713
ENSMUST00000217853.1	4933412E12Rik	4933412E12Rik-201	chr10:116950588-116963279	+	bidirectional_promoter_lncRNA	52.8081	58.1098	55.4908	37.621	70.1756	31.1917	55.4696	46.3294	0.835221	-0.25977	0.494175	0.607974
ENSMUST00000146641.1	Slc38a10	Slc38a10-211	chr11:120105621-120106988	-	processed_transcript	43.4157	64.355	61.4937	40.041	47.5568	43.5767	56.4215	43.7248	0.774968	-0.367792	0.13981	0.250842
ENSMUST00000132354.1	Snx11	Snx11-205	chr11:96772537-96774641	-	processed_transcript	38.7251	28.1031	23.2284	22.8271	21.723	24.5241	30.0189	23.0247	0.767009	-0.382685	0.206742	0.327639
ENSMUST00000142219.1	Prrc2b	Prrc2b-209	chr2:32217212-32219156	+	processed_transcript	31.6424	37.1772	20.3219	20.779	31.1473	17.7477	29.7139	23.2247	0.781611	-0.355478	0.368496	0.50216
ENSMUST00000136218.1	C230037L18Rik	C230037L18Rik-201	chr15:89476236-89484847	+	antisense_RNA	24.0093	26.6758	35.1901	17.9205	22.1477	27.2661	28.6251	22.4448	0.784095	-0.350899	0.225835	0.350079
ENSMUST00000139444.7	2210408F21Rik	2210408F21Rik-207	chr6:31220405-31337385	+	lincRNA	55.4579	44.7917	69.9802	42.7857	59.7916	32.5604	56.7433	45.0459	0.793854	-0.333054	0.339173	0.472162
ENSMUST00000173576.1	Gm20522	Gm20522-201	chr17:35122738-35126440	-	antisense_RNA	211.336	233.071	220.096	165.626	153.13	203.228	221.501	173.995	0.785526	-0.348269	0.0436811	0.109431
ENSMUST00000182725.1	Oas1b	Oas1b-202	chr5:120812635-120814585	+	processed_transcript	73.11	74.3161	96.2902	75.7238	44.0603	74.4128	81.2387	64.7323	0.796815	-0.327683	0.266582	0.39606
ENSMUST00000152157.7	2210408F21Rik	2210408F21Rik-212	chr6:31220405-31337377	+	lincRNA	24.8623	35.9526	20.5903	9.04876	27.585	34.8626	27.1351	23.8321	0.878277	-0.187251	0.73065	0.807063
ENSMUST00000125702.1	Cox10	Cox10-202	chr11:64071398-64079468	-	processed_transcript	29.0252	39.1439	38.7564	45.2821	43.61	10.5282	35.6418	33.1401	0.92981	-0.104993	0.842339	0.893599
ENSMUST00000139535.1	Pmpca	Pmpca-206	chr2:26390927-26392398	+	processed_transcript	81.247	64.8578	49.9452	52.152	43.2038	55.0797	65.35	50.1451	0.767332	-0.382078	0.192783	0.312396
ENSMUST00000145125.1	Cox19	Cox19-203	chr5:139338140-139339575	-	processed_transcript	31.2149	40.6427	48.6768	16.784	43.7818	39.6272	40.1781	33.3976	0.83124	-0.266664	0.5268	0.635693
ENSMUST00000135244.1	E030042O20Rik	E030042O20Rik-201	chr2:75704770-75710024	+	processed_transcript	35.5898	17.8547	50.0413	12.834	44.2147	26.4101	34.4953	27.8196	0.806476	-0.310297	0.63484	0.732385
ENSMUST00000182379.6	Ank3	Ank3-218	chr10:69533772-69720860	+	processed_transcript	35.6333	30.6743	39.7708	26.1345	32.5149	24.0122	35.3595	27.5538	0.77925	-0.359842	0.100327	0.197595
ENSMUST00000128543.1	Cenpx	Cenpx-205	chr11:120710942-120711983	-	processed_transcript	57.7682	74.3716	13.9771	22.3599	63.8235	19.726	48.7056	35.3032	0.724827	-0.464292	0.591158	0.694232
ENSMUST00000051330.4	D830039M14Rik	D830039M14Rik-201	chr10:61475245-61476937	-	antisense_RNA	194.856	180.811	214.024	134.097	165.733	158.896	196.564	152.909	0.777908	-0.362328	0.0326068	0.0895708
ENSMUST00000141319.1	Mtch1	Mtch1-205	chr17:29333719-29334107	-	processed_transcript	35.5672	23.1721	49.6839	14.5364	30.5036	43.2284	36.1411	29.4228	0.81411	-0.296704	0.583952	0.688337
ENSMUST00000221680.1	Brf1	Brf1-205	chr12:112970137-112986519	-	processed_transcript	34.1853	30.8132	46.569	28.5939	25.1302	31.7868	37.1892	28.5036	0.766449	-0.383738	0.167688	0.283876
ENSMUST00000152784.7	Gm11423	Gm11423-202	chr11:82779601-82781042	-	antisense_RNA	49.1266	56.3214	89.0204	36.8854	81.8739	37.9185	64.8228	52.2259	0.805673	-0.311735	0.548568	0.655212
ENSMUST00000173557.1	Calm3	Calm3-204	chr7:16917144-16923829	-	processed_transcript	83.356	75.8045	75.8643	64.1544	51.7008	67.1877	78.3416	61.0143	0.778824	-0.360631	0.0319084	0.0884724
ENSMUST00000126723.7	Pcyt2	Pcyt2-207	chr11:120613030-120617913	-	processed_transcript	46.3359	45.6652	56.6264	34.7497	31.3103	51.1804	49.5425	39.0801	0.788821	-0.34223	0.21372	0.336685
ENSMUST00000150234.7	Rapgef4	Rapgef4-208	chr2:71981259-72141301	+	processed_transcript	34.928	33.2301	135.422	15.627	80.8025	57.7611	67.8599	51.3969	0.757397	-0.400879	0.693175	0.779338
ENSMUST00000163731.1	Proscos	Proscos-201	chr8:27042382-27042997	-	antisense_RNA	195.629	336.371	260.401	199.004	216.727	184.284	264.134	200.005	0.757213	-0.401229	0.199243	0.319372
ENSMUST00000197326.1	4632404M16Rik	4632404M16Rik-201	chr3:102134615-102137496	+	sense_intronic	199.888	175.75	147.579	107.756	154.809	144.013	174.406	135.526	0.777073	-0.363878	0.134392	0.243901
ENSMUST00000228007.1	AC174678.1	AC174678.1-201	chr14:55643604-55646352	+	antisense_RNA	51.2533	54.9516	54.4284	39.9313	35.4067	50.1671	53.5444	41.835	0.781314	-0.356025	0.0605117	0.137758
ENSMUST00000153989.1	Tha1	Tha1-203	chr11:117867952-117873481	-	processed_transcript	60.1577	84.0555	17.4244	37.3572	26.6676	40.9088	53.8792	34.9779	0.64919	-0.623287	0.397143	0.524045
ENSMUST00000225202.1	Thoc7	Thoc7-207	chr14:13950119-13961212	-	processed_transcript	177.379	95.0974	162.273	81.1677	172.189	90.5552	144.916	114.637	0.79106	-0.338141	0.47455	0.591339
ENSMUST00000139612.1	Gm15706	Gm15706-201	chr6:145250529-145251849	+	lincRNA	43.9155	65.492	51.1654	31.3013	56.528	38.3942	53.5243	42.0745	0.786082	-0.347248	0.308785	0.440697
ENSMUST00000191832.5	Rassf1	Rassf1-210	chr9:107555376-107557800	+	processed_transcript	193.855	100.748	127.248	99.1255	69.6132	165.697	140.617	111.479	0.792783	-0.335002	0.503484	0.616266
ENSMUST00000205048.1	Itpr1	Itpr1-211	chr6:108458703-108471129	+	processed_transcript	42.6105	23.5856	55.9056	36.0695	11.9264	59.6954	40.7006	35.8971	0.88198	-0.181183	0.787631	0.853902
ENSMUST00000150549.7	Acox1	Acox1-207	chr11:116175343-116181214	-	processed_transcript	39.3914	40.0586	33.1463	15.5763	26.1152	58.5397	37.5321	33.4104	0.890182	-0.167828	0.769002	0.839124
ENSMUST00000132261.1	Gm11734	Gm11734-201	chr11:117523603-117532205	+	lincRNA	69.3174	107.949	76.3913	61.4737	43.1665	97.6456	84.5526	67.4286	0.797475	-0.326489	0.438674	0.560355
ENSMUST00000181403.2	1810034E14Rik	1810034E14Rik-201	chr13:64248700-64268148	+	antisense_RNA	136.586	172.902	126.121	81.9803	153.808	106.94	145.203	114.243	0.786778	-0.345972	0.289532	0.42
ENSMUST00000219015.1	1300014J16Rik	1300014J16Rik-201	chr12:80115863-80117199	+	lincRNA	68.6927	52.6621	55.4722	47.8307	34.2308	55.4077	58.9423	45.8231	0.777422	-0.363231	0.173177	0.289279
ENSMUST00000223595.1	Zfp397	Zfp397-202	chr18:23954859-23956415	+	processed_transcript	54.2352	85.6372	94.7847	48.9601	56.7328	71.3883	78.219	59.027	0.754638	-0.406144	0.240309	0.367094
ENSMUST00000133007.1	Ap1b1	Ap1b1-204	chr11:5038764-5040421	+	processed_transcript	21.8825	45.9083	50.0337	20.2552	31.2143	35.5818	39.2748	29.0171	0.738823	-0.4367	0.35826	0.491937
ENSMUST00000222034.1	Actn2	Actn2-205	chr13:12269478-12274096	-	processed_transcript	228.536	216.205	288.462	181.631	195.876	178.777	244.401	185.428	0.758704	-0.39839	0.0618891	0.139819
ENSMUST00000133539.1	Nr4a3	Nr4a3-202	chr4:48051248-48056739	+	processed_transcript	27.0464	50.6028	25.5686	42.2046	20.4622	18.0683	34.4059	26.9117	0.782182	-0.354424	0.538932	0.646924
ENSMUST00000111461.10	Ptpmt1	Ptpmt1-202	chr2:90910713-90918258	-	processed_transcript	31.3071	104.345	102.288	41.6662	61.2342	58.3257	79.3134	53.742	0.67759	-0.561515	0.360273	0.494297
ENSMUST00000218258.1	Shmt2	Shmt2-204	chr10:127519117-127522402	-	processed_transcript	80.1278	90.6649	110.421	84.3789	57.9885	72.7605	93.7378	71.7093	0.764999	-0.386471	0.133124	0.242824
ENSMUST00000142118.1	Adamts2	Adamts2-204	chr11:50795417-50798346	+	processed_transcript	61.9503	62.3026	53.6315	36.8602	56.5419	43.9978	59.2948	45.8	0.772411	-0.372559	0.103136	0.201708
ENSMUST00000136070.7	Rita1	Rita1-203	chr5:120607042-120612589	-	processed_transcript	4.04504	20.3924	29.3024	16.695	1	63.8603	17.9133	27.1851	1.5176	0.601788	0.671341	0.76348
ENSMUST00000123981.7	Gpsm1	Gpsm1-205	chr2:26339431-26345331	+	processed_transcript	1077.48	1055.16	930.932	743.669	741.813	845.052	1021.19	776.845	0.760725	-0.394553	0.0127287	0.0489894
ENSMUST00000136082.1	Laptm5	Laptm5-204	chr4:130913321-130926345	+	processed_transcript	15.0413	32.5702	23.461	12.8967	8.59058	45.6685	23.6908	22.3853	0.944891	-0.0817799	0.923399	0.946508
ENSMUST00000131372.1	Acap3	Acap3-205	chr4:155903321-155905341	+	processed_transcript	29.6541	89.624	45.7332	49.8967	35.0304	30.5075	55.0038	38.4782	0.699556	-0.515489	0.430249	0.552254
ENSMUST00000186130.1	Gm28873	Gm28873-201	chr17:15065615-15074752	+	lincRNA	36.1794	36.5668	30.0676	18.084	35.3984	27.121	34.2712	26.8678	0.783975	-0.351121	0.244063	0.371365
ENSMUST00000163493.2	2810468N07Rik	2810468N07Rik-201	chr17:25570811-25575043	+	processed_transcript	37.5205	18.104	36.428	16.3809	28.4154	23.1911	30.6842	22.6624	0.738571	-0.437191	0.327501	0.461525
ENSMUST00000129027.1	Tcf3	Tcf3-212	chr10:80412627-80415487	-	processed_transcript	120.663	97.9223	52.382	56.194	58.2949	82.4007	90.3223	65.6298	0.726618	-0.460731	0.319928	0.453262
ENSMUST00000201322.3	Limch1	Limch1-215	chr5:66968005-67054694	+	processed_transcript	31.8474	45.8935	46.3748	121.47	2.07995	116.874	41.3719	80.1411	1.93709	0.953891	0.380204	0.509433
ENSMUST00000181663.1	Fbxo31	Fbxo31-204	chr8:121564331-121578790	-	processed_transcript	103.934	92.7143	91.3051	78.9675	71.6375	67.5789	95.9844	72.728	0.757706	-0.40029	0.0110754	0.0448177
ENSMUST00000148976.1	Dnaja1	Dnaja1-208	chr4:40724049-40732263	+	processed_transcript	39.1816	132.87	37.6836	49.6986	49.2748	34.7683	69.9117	44.5806	0.63767	-0.649118	0.47111	0.58778
ENSMUST00000150874.1	BC004004	BC004004-204	chr17:29298284-29301525	+	processed_transcript	38.2476	68.2045	54.1427	30.03	52.784	38.6217	53.5316	40.4786	0.756163	-0.403232	0.297347	0.428744
ENSMUST00000197331.1	Anapc5	Anapc5-206	chr5:122817857-122821275	-	processed_transcript	44.1537	70.2427	50.1765	39.583	33.4638	50.8363	54.8576	41.2944	0.752755	-0.409748	0.221921	0.345499
ENSMUST00000127231.1	Alkbh3	Alkbh3-206	chr2:93996247-94005187	-	processed_transcript	69.7905	52.7972	86.0199	34.4729	50.6079	78.5228	69.5359	54.5345	0.784265	-0.350588	0.402832	0.527957
ENSMUST00000199326.1	Gm9899	Gm9899-202	chr5:30573987-30588619	-	lincRNA	199.708	182.459	178.673	128.62	154.439	141.453	186.947	141.504	0.756921	-0.401786	0.0100069	0.0419423
ENSMUST00000222261.1	Foxn3	Foxn3-211	chr12:99196670-99330063	-	processed_transcript	24.2365	33.4417	19.6977	7.56016	29.1097	31.3028	25.792	22.6575	0.878473	-0.18693	0.733567	0.808336
ENSMUST00000126451.7	Anp32a	Anp32a-202	chr9:62344799-62374715	+	processed_transcript	549.86	434.212	551.648	329.13	192.172	897.972	511.906	473.092	0.924176	-0.113761	0.868263	0.909988
ENSMUST00000125025.1	Snx11	Snx11-203	chr11:96770098-96771050	-	processed_transcript	52.1232	52.4029	40.1698	34.1535	29.5767	46.8373	48.232	36.8558	0.764137	-0.388096	0.157449	0.272306
ENSMUST00000133923.1	Cnot8	Cnot8-203	chr11:58114027-58117258	+	processed_transcript	18.2218	23.5847	37.6788	17.0237	10.2785	39.8436	26.4951	22.3819	0.844757	-0.243392	0.719307	0.799265
ENSMUST00000136325.2	Ciz1	Ciz1-214	chr2:32363433-32365851	+	processed_transcript	1	76.3979	138.111	1	57.1623	78.8571	71.8362	45.6731	0.635795	-0.653366	0.599427	0.70149
ENSMUST00000156237.1	Eepd1	Eepd1-202	chr9:25482867-25487313	+	processed_transcript	37.1779	25.3236	21.0643	37.2683	6.73692	33.6293	27.8553	25.8782	0.929024	-0.106213	0.863249	0.906996
ENSMUST00000186359.1	Phlda1	Phlda1-202	chr10:111507696-111508165	+	processed_transcript	76.3937	66.5098	61.2417	47.6126	72.1919	38.5037	68.0484	52.7694	0.775469	-0.366859	0.237079	0.363483
ENSMUST00000141839.1	Nudcd2	Nudcd2-204	chr11:40734205-40739483	+	processed_transcript	48.6719	62.9422	229.246	56.3385	72.6452	72.941	113.62	67.3082	0.592398	-0.755362	0.47087	0.587625
ENSMUST00000133550.1	D330023K18Rik	D330023K18Rik-201	chr2:31150641-31152291	-	processed_transcript	179.299	162.497	155.843	105.647	145.796	124.799	165.879	125.414	0.756056	-0.403436	0.0403313	0.103615
ENSMUST00000171978.1	Slc29a1	Slc29a1-224	chr17:45586218-45588741	-	processed_transcript	92.4251	50.7915	53.1639	27.6352	63.7594	59.9125	65.4601	50.4357	0.77048	-0.376171	0.443889	0.564868
ENSMUST00000134345.1	Mir22hg	Mir22hg-201	chr11:75461644-75464029	+	processed_transcript	268.223	191.205	277.399	176.331	148.737	229.169	245.609	184.746	0.752195	-0.410822	0.167157	0.283356
ENSMUST00000182551.1	Gm27030	Gm27030-201	chr8:121654054-121654517	+	lincRNA	46.5425	60.2386	18.5675	31.1536	22.0506	31.9223	41.7829	28.3755	0.679118	-0.558267	0.349491	0.48279
ENSMUST00000148845.1	Fbxw5	Fbxw5-209	chr2:25503907-25504945	+	processed_transcript	104.343	105.724	78.4878	89.407	80.9187	50.2278	96.1849	73.5178	0.764338	-0.387717	0.201237	0.321239
ENSMUST00000206750.1	Dedd2	Dedd2-204	chr7:25199915-25219859	-	processed_transcript	291.171	234.286	198.416	141.029	201.394	199.648	241.291	180.69	0.748848	-0.417255	0.144785	0.257748
ENSMUST00000182865.1	4930539J05Rik	4930539J05Rik-202	chr3:135436209-135438665	-	antisense_RNA	63.1355	47.3355	53.7852	70.1004	13.4848	71.1938	54.7521	51.593	0.942302	-0.0857386	0.879772	0.9188
ENSMUST00000172665.1	Mapk6	Mapk6-203	chr9:75398412-75409985	-	processed_transcript	46.8891	72.8043	92.1139	60.2443	67.6412	32.2886	70.6025	53.3914	0.756226	-0.403111	0.367519	0.501506
ENSMUST00000129810.1	Abca8a	Abca8a-205	chr11:110068795-110070379	-	processed_transcript	219.226	146.482	205.145	177.562	114.927	135.03	190.284	142.506	0.748911	-0.417133	0.174004	0.290084
ENSMUST00000125359.1	Bnip3	Bnip3-202	chr7:138898710-138909479	-	processed_transcript	36.0959	36.7422	31.6423	26.0502	31.4471	21.4192	34.8268	26.3055	0.755323	-0.404835	0.0617669	0.139606
ENSMUST00000150608.1	Ubac1	Ubac1-208	chr2:26015965-26021602	-	processed_transcript	92.9808	72.8265	133.878	76.8075	147.412	33.3605	99.8952	85.8601	0.859502	-0.218427	0.729084	0.806571
ENSMUST00000212158.1	Gm42047	Gm42047-201	chr8:121833247-121835108	+	lincRNA	71.2152	61.3022	51.1354	46.5152	27.503	72.5485	61.2176	48.8556	0.798064	-0.325424	0.435644	0.557616
ENSMUST00000129379.1	Gm11767	Gm11767-201	chr11:119935803-119942698	-	antisense_RNA	49.9178	48.8901	23.6399	24.1662	21.3257	45.9605	40.8159	30.4841	0.746869	-0.421073	0.423174	0.545815
ENSMUST00000193868.1	Tma7	Tma7-204	chr9:109078186-109082378	-	processed_transcript	104.196	101.415	193.719	94.8513	122.185	72.2951	133.11	96.4438	0.724541	-0.464862	0.336124	0.469865
ENSMUST00000133715.1	Clint1	Clint1-203	chr11:45882397-45910625	+	processed_transcript	49.221	43.5979	41.7765	51.1698	14.8052	48.3928	44.8651	38.1226	0.849716	-0.234948	0.601239	0.70312
ENSMUST00000138647.1	Nt5c3	Nt5c3-207	chr6:56891539-56923890	-	processed_transcript	13.5084	5.02098	5.59658	1	2.35123	65.9686	8.04199	23.1066	2.87325	1.52268	0.524101	0.633042
ENSMUST00000129673.7	Rpl7a	Rpl7a-202	chr2:26912192-26913318	+	processed_transcript	201.917	274.162	233.525	142.141	190.062	195.507	236.535	175.903	0.743668	-0.427269	0.0874174	0.17881
ENSMUST00000137597.7	Fkbp1a	Fkbp1a-204	chr2:151542594-151559620	+	processed_transcript	9.35168	32.0393	20.8193	28.0823	90.6405	1	20.7368	39.9076	1.92449	0.944473	0.521825	0.631353
ENSMUST00000177544.1	Senp6	Senp6-215	chr9:80067817-80087498	+	processed_transcript	66.466	172.246	76.8043	48.8369	62.1314	118.235	105.172	76.4011	0.726439	-0.461086	0.509988	0.622111
ENSMUST00000160321.7	AI480526	AI480526-206	chr5:123134463-123141076	-	lincRNA	91.2424	138.677	123.305	79.2651	61.6966	130.152	117.741	90.3712	0.76754	-0.381686	0.332214	0.46608
ENSMUST00000216525.1	Gm35177	Gm35177-201	chr9:40547360-40561393	+	lincRNA	46.6698	43.9358	31.4917	14.9333	36.5845	48.1547	40.6991	33.2241	0.816336	-0.292765	0.526889	0.635496
ENSMUST00000130142.1	Cdc123	Cdc123-205	chr2:5794665-5798598	-	processed_transcript	182.671	226.905	43.0928	160.475	29.8928	151.491	150.89	113.953	0.755207	-0.405056	0.623626	0.723424
ENSMUST00000061537.11	2810025M15Rik	2810025M15Rik-201	chr1:157412352-157420236	+	processed_transcript	580.025	506.183	551.569	370.686	430.919	412.17	545.926	404.592	0.741111	-0.432238	0.00716204	0.034628
ENSMUST00000208106.1	Tacc2	Tacc2-212	chr7:130645929-130674739	+	processed_transcript	188.718	168.423	176.408	79.0996	170.432	169.034	177.849	139.522	0.784495	-0.350164	0.281088	0.411184
ENSMUST00000197289.1	Map4	Map4-209	chr9:109969017-110003289	+	processed_transcript	6.51549	70.2075	41.1492	17.968	16.2435	26.1901	39.2907	20.1339	0.512433	-0.964564	0.362708	0.49669
ENSMUST00000127659.1	Rpl22	Rpl22-203	chr4:152327126-152330275	+	processed_transcript	103.249	89.0946	112.405	76.1507	86.8268	63.4511	101.583	75.4762	0.743	-0.428565	0.0525841	0.124962
ENSMUST00000144293.1	Ccm2	Ccm2-204	chr11:6561121-6562952	+	processed_transcript	31.5978	23.4983	29.4071	15.2182	15.486	37.1959	28.1677	22.6334	0.80352	-0.315593	0.51064	0.622756
ENSMUST00000153772.1	Ppig	Ppig-212	chr2:69722545-69723789	+	processed_transcript	28.8452	38.0496	35.2873	24.7307	20.3592	30.8088	34.0607	25.2996	0.74278	-0.428993	0.0980639	0.194736
ENSMUST00000128932.7	Zfp62	Zfp62-204	chr11:49203485-49213636	+	processed_transcript	43.4924	76.9422	43.7717	45.5479	24.7829	51.9426	54.7354	40.7578	0.744633	-0.425399	0.368477	0.502269
ENSMUST00000141178.1	Gripap1	Gripap1-208	chrX:7810267-7810815	+	processed_transcript	52.8965	18.1104	49.4353	11.4359	23.0537	71.8432	40.1474	35.4443	0.882854	-0.179754	0.838003	0.891063
ENSMUST00000169906.1	Nisch	Nisch-217	chr14:31177206-31181470	-	processed_transcript	1278.03	451.376	968.398	680.601	2349.26	139.716	899.267	1056.52	1.17487	0.232504	0.83495	0.888943
ENSMUST00000125072.1	Hdac5	Hdac5-206	chr11:102219153-102230146	-	processed_transcript	16.2549	106.276	31.1572	22.0345	37.3556	26.1161	51.2292	28.5021	0.556363	-0.845901	0.46593	0.583339
ENSMUST00000150832.1	Clpb	Clpb-209	chr7:101763606-101785635	+	processed_transcript	12.6683	22.1626	85.9395	8.24194	17.8228	65.5249	40.2568	30.5299	0.758379	-0.399009	0.754455	0.826113
ENSMUST00000147597.7	Podn	Podn-208	chr4:108027021-108030986	-	processed_transcript	35.6202	51.3963	18.3404	20.1986	21.5565	30.5916	35.119	24.1156	0.686682	-0.542286	0.336668	0.470104
ENSMUST00000131222.1	Gm4285	Gm4285-201	chr14:75843379-75844964	-	antisense_RNA	91.3231	72.1336	83.7366	44.8557	54.3193	89.6627	82.3978	62.9459	0.763927	-0.388493	0.257202	0.385307
ENSMUST00000150315.7	Slc38a10	Slc38a10-213	chr11:120134807-120151287	-	processed_transcript	13.1202	58.0194	31.3023	15.4515	36.8478	16.5606	34.1473	22.9533	0.672184	-0.573073	0.49093	0.605609
ENSMUST00000223413.1	Dlst	Dlst-211	chr12:85125861-85134090	+	processed_transcript	93.9791	75.9959	85.0927	76.3598	55.8026	56.3367	85.0226	62.833	0.739016	-0.436322	0.0599143	0.136707
ENSMUST00000140539.7	Slc25a19	Slc25a19-206	chr11:115623412-115628112	-	processed_transcript	44.2681	46.9038	37.8583	33.698	34.3918	26.7654	43.0101	31.6184	0.735139	-0.443912	0.0347682	0.0934199
ENSMUST00000147215.7	Dmpk	Dmpk-213	chr7:19087269-19089132	+	processed_transcript	80.3777	79.0417	69.7313	62.4129	58.6818	47.6827	76.3835	56.2591	0.736534	-0.441175	0.0221899	0.0692214
ENSMUST00000212173.2	Myo9b	Myo9b-204	chr8:71333817-71339008	+	processed_transcript	289.794	276.404	264.433	175.811	242.225	195.484	276.877	204.507	0.738619	-0.437097	0.0261981	0.0776844
ENSMUST00000130954.7	Sdccag3	Sdccag3-205	chr2:26386655-26389283	-	processed_transcript	53.4313	64.7012	82.4667	25.1695	56.8795	78.2654	66.8664	53.4381	0.799178	-0.323412	0.487706	0.602665
ENSMUST00000153526.7	Kat2a	Kat2a-204	chr11:100704746-100712173	-	processed_transcript	63.7255	20.0636	27.2957	75.5419	2.33283	77.5682	37.0283	51.8143	1.39932	0.484723	0.627712	0.726657
ENSMUST00000149300.7	Gm16534	Gm16534-201	chr2:32050086-32064164	-	processed_transcript	69.3118	100.142	150.016	57.3683	70.1297	100.673	106.49	76.0572	0.71422	-0.48556	0.319469	0.452993
ENSMUST00000150168.7	Ewsr1	Ewsr1-211	chr11:5071520-5082340	-	processed_transcript	45.5157	32.7433	33.875	39.2102	26.6975	18.6973	37.378	28.2017	0.754499	-0.406409	0.273268	0.403023
ENSMUST00000173227.7	Yap1	Yap1-205	chr9:7973796-8003757	-	processed_transcript	67.7352	125.976	69.945	49.103	48.047	98.0575	87.8855	65.0691	0.740385	-0.433652	0.416535	0.54099
ENSMUST00000181612.1	2700046G09Rik	2700046G09Rik-201	chr19:32389216-32391184	+	lincRNA	87.2131	81.1776	85.7686	52.5748	56.2142	79.3102	84.7198	62.6997	0.740084	-0.434239	0.0619544	0.139904
ENSMUST00000133155.1	Zfp326	Zfp326-202	chr5:105876941-105886194	+	processed_transcript	22.6849	27.1461	39.6481	19.8131	39.5961	11.9358	29.8264	23.7817	0.797337	-0.326739	0.565721	0.67156
ENSMUST00000190120.1	1700052K11Rik	1700052K11Rik-201	chr11:105177726-105181433	-	antisense_RNA	107.496	67.8022	118.321	57.5891	71.5772	80.1599	97.8731	69.7754	0.712917	-0.488195	0.167884	0.28392
ENSMUST00000144441.7	Lgalsl	Lgalsl-203	chr11:20826350-20830755	-	processed_transcript	38.961	46.9994	43.7037	30.5423	20.2057	49.6011	43.2213	33.4497	0.773916	-0.369752	0.334831	0.468838
ENSMUST00000156285.1	Gm16312	Gm16312-201	chr19:4000758-4001232	-	antisense_RNA	43.2504	39.4283	28.7651	17.7702	31.7644	33.2102	37.1479	27.5816	0.74248	-0.429575	0.218478	0.341193
ENSMUST00000127266.1	Rad23b	Rad23b-202	chr4:55350050-55368574	+	processed_transcript	55.6979	49.823	74.3894	21.3691	34.4174	107.201	59.9701	54.3293	0.905939	-0.142514	0.848635	0.896879
ENSMUST00000128386.1	Pprc1	Pprc1-205	chr19:46056832-46061458	+	processed_transcript	13.9092	31.081	18.8103	66.4925	1	46.6556	21.2668	38.0494	1.78914	0.839266	0.449686	0.568654
ENSMUST00000150031.1	Tmem57	Tmem57-205	chr4:134802759-134811213	-	processed_transcript	32.8107	30.0067	33.3162	8.15398	80.7004	19.0032	32.0445	35.9525	1.12195	0.166015	0.871199	0.912305
ENSMUST00000156387.1	Gm16534	Gm16534-202	chr2:32050881-32064911	-	processed_transcript	162.497	145.521	187.751	116.903	110.097	131.264	165.256	119.421	0.722644	-0.468643	0.0291039	0.083074
ENSMUST00000132572.1	Ttc4	Ttc4-205	chr4:106676290-106678889	-	processed_transcript	51.318	175.496	61.2245	43.0746	69.0102	70.4391	96.0128	60.8413	0.633679	-0.658176	0.437531	0.559605
ENSMUST00000156418.7	A930012O16Rik	A930012O16Rik-202	chr2:57236227-57238508	-	processed_transcript	33.0456	31.6597	34.6561	26.5845	16.4863	31.3872	33.1205	24.8194	0.749366	-0.416259	0.137235	0.247456
ENSMUST00000130698.7	Galt	Galt-203	chr4:41756210-41758695	+	processed_transcript	70.2545	171.444	68.3354	2.48291	393.526	319.118	103.345	238.376	2.30661	1.20577	0.339546	0.47255
ENSMUST00000156602.1	Invs	Invs-206	chr4:48279760-48309202	+	processed_transcript	21.1594	30.7802	26.6418	47.0342	17.8071	7.84275	26.1938	24.228	0.924953	-0.112549	0.87868	0.91823
ENSMUST00000126018.1	Cttn	Cttn-203	chr7:144440015-144445905	-	processed_transcript	38.9317	72.3648	53.1542	27.185	51.4648	40.3116	54.8169	39.6538	0.723386	-0.467161	0.273683	0.403516
ENSMUST00000138653.7	2210408F21Rik	2210408F21Rik-206	chr6:31285004-31337403	+	lincRNA	50.3447	61.7476	59.3877	19.3357	87.7421	40.9208	57.16	49.3328	0.863066	-0.212458	0.721852	0.80121
ENSMUST00000140940.7	Cflar	Cflar-209	chr1:58711508-58754341	+	processed_transcript	64.9995	31.0184	64.2404	35.6141	48.8318	27.9893	53.4194	37.4784	0.701587	-0.511305	0.279357	0.409605
ENSMUST00000124304.1	Tnip1	Tnip1-207	chr11:54910787-54956104	-	processed_transcript	15.5744	24.2631	36.1254	5.58281	41.4968	22.0379	25.321	23.0392	0.909886	-0.136242	0.85807	0.903817
ENSMUST00000180531.1	Senp1	Senp1-203	chr15:98088557-98093305	-	processed_transcript	121.258	61.8813	110.336	65.5481	59.2673	79.6052	97.8251	68.1402	0.696551	-0.521699	0.197194	0.317401
ENSMUST00000181502.1	Gm17586	Gm17586-201	chr11:120633768-120635125	+	lincRNA	66.3814	57.5468	63.1821	33.9226	46.876	56.6308	62.3701	45.8098	0.734483	-0.445198	0.0790539	0.166433
ENSMUST00000155288.1	Exoc7	Exoc7-210	chr11:116289109-116291470	-	processed_transcript	35.3865	53.824	45.6364	19.9197	39.5757	41.1316	44.949	33.5423	0.746231	-0.422306	0.258294	0.386367
ENSMUST00000153764.7	Ino80e	Ino80e-208	chr7:126852682-126861732	-	processed_transcript	26.5651	25.9558	33.2655	94.4965	90.5211	1	28.5955	62.0059	2.16838	1.11662	0.336455	0.469936
ENSMUST00000126483.7	Med1	Med1-204	chr11:98153011-98163957	-	processed_transcript	65.9515	93.5019	50.7412	40.6707	55.1951	51.7719	70.0649	49.2125	0.702386	-0.509665	0.190915	0.310368
ENSMUST00000143659.1	Gpt2	Gpt2-204	chr8:85492609-85493307	+	processed_transcript	24.9785	48.3319	22.9294	9.03314	28.7981	39.4481	32.0799	25.7598	0.802988	-0.31655	0.628318	0.727192
ENSMUST00000145325.1	Apmap	Apmap-203	chr2:150594364-150608544	-	processed_transcript	12.0623	13.7012	26.4701	3.93355	68.3895	6.02405	17.4112	26.1157	1.49994	0.584904	0.707952	0.789434
ENSMUST00000181638.1	5033428I22Rik	5033428I22Rik-201	chr8:57332118-57340682	+	lincRNA	42.3389	59.3202	59.0858	27.2563	32.1243	62.6437	53.5817	40.6748	0.759118	-0.397604	0.357372	0.491521
ENSMUST00000200800.1	Atraid	Atraid-203	chr5:31053870-31054623	+	processed_transcript	51.7981	72.0673	75.8635	57.1149	38.1459	47.8351	66.5763	47.6986	0.716451	-0.481061	0.111181	0.213301
ENSMUST00000190789.2	Gm37494	Gm37494-203	chr7:39544402-39553332	+	lincRNA	71.4129	79.7059	51.9706	48.6504	57.5206	38.8985	67.6965	48.3565	0.714314	-0.48537	0.120309	0.226331
ENSMUST00000144205.1	Gapdh	Gapdh-204	chr6:125162843-125164916	-	processed_transcript	140.259	61.2627	120.064	52.4058	88.254	82.0191	107.195	74.2263	0.69244	-0.53024	0.275886	0.405578
ENSMUST00000150782.1	Atcayos	Atcayos-203	chr10:81194691-81210877	+	antisense_RNA	735.093	677.142	750.879	428.555	585.053	546.959	721.038	520.189	0.721445	-0.471039	0.0183144	0.0613075
ENSMUST00000194375.1	D730003I15Rik	D730003I15Rik-202	chr1:191224474-191226140	+	lincRNA	53.2013	83.8587	48.8374	31.4029	47.7336	53.2711	61.9658	44.1359	0.712262	-0.48952	0.236838	0.363223
ENSMUST00000126047.1	Parva	Parva-204	chr7:112569250-112579659	+	processed_transcript	46.3266	21.1945	28.0336	23.7857	26.6083	15.9353	31.8515	22.1098	0.694151	-0.526679	0.298149	0.429287
ENSMUST00000156270.1	Nr2f6	Nr2f6-208	chr8:71375118-71375790	-	processed_transcript	112.669	120.146	62.536	44.3009	74.1421	94.3487	98.4503	70.9306	0.720471	-0.472988	0.301262	0.432903
ENSMUST00000150760.1	Ypel3	Ypel3-208	chr7:126777508-126780231	+	processed_transcript	71.6895	83.1606	91.7721	53.0054	45.3167	83.134	82.2074	60.4854	0.735766	-0.442682	0.16808	0.284061
ENSMUST00000151711.1	Bccip	Bccip-204	chr7:133714742-133720941	+	processed_transcript	669.028	370.311	436.322	58.5817	919.094	730.982	491.887	569.553	1.15789	0.211502	0.792696	0.856629
ENSMUST00000181605.1	9530082P21Rik	9530082P21Rik-203	chr17:23749236-23754065	+	antisense_RNA	114.045	104.952	110.731	61.7007	68.1132	114.788	109.909	81.5339	0.741829	-0.430842	0.169222	0.285512
ENSMUST00000038032.4	5033430I15Rik	5033430I15Rik-201	chr13:45965253-45966508	+	lincRNA	182.302	248.13	127.481	120.136	135.526	128.737	185.971	128.133	0.688995	-0.537434	0.175314	0.291688
ENSMUST00000225343.1	AC175538.1	AC175538.1-201	chr13:115089501-115090987	+	antisense_RNA	40.9849	28.1875	29.5756	15.5161	33.1136	24.1575	32.916	24.2624	0.7371	-0.440067	0.253871	0.382019
ENSMUST00000129592.1	Sypl	Sypl-204	chr12:32954559-32967679	+	processed_transcript	102.874	84.0779	66.4983	56.1807	41.6589	89.207	84.4832	62.3488	0.738003	-0.438302	0.275916	0.405503
ENSMUST00000127735.7	Mecr	Mecr-202	chr4:131857763-131867786	+	processed_transcript	55.2242	26.0975	50.7023	22.939	41.6085	27.7842	44.008	30.7772	0.699355	-0.515902	0.281545	0.411375
ENSMUST00000174264.1	Rnf169	Rnf169-202	chr7:99935278-99965734	-	processed_transcript	172.979	153.656	135.487	133.069	82.2459	119.232	154.041	111.516	0.723935	-0.466067	0.0846124	0.175206
ENSMUST00000180525.1	2700012I20Rik	2700012I20Rik-201	chr9:57075216-57076013	-	lincRNA	39.5501	57.9106	52.5186	61.4549	29.8649	23.7081	49.9931	38.3426	0.766958	-0.38278	0.417497	0.541682
ENSMUST00000137109.1	Stx12	Stx12-202	chr4:132857046-132863260	-	processed_transcript	245.463	68.9227	100.585	182.786	36.0737	92.964	138.324	103.941	0.751435	-0.41228	0.64497	0.741525
ENSMUST00000129681.1	Gm16052	Gm16052-201	chr17:13759370-13759985	-	antisense_RNA	91.8654	74.6753	73.6695	107.279	33.1066	51.0323	80.0701	63.806	0.796877	-0.327571	0.520405	0.629938
ENSMUST00000223931.1	Rps24	Rps24-203	chr14:24487125-24493493	+	processed_transcript	1312.82	1045.39	638.066	570.362	743.922	739.608	998.759	684.631	0.685481	-0.544811	0.19902	0.319218
ENSMUST00000129886.1	Sgcg	Sgcg-203	chr14:61222816-61232440	-	processed_transcript	71.1282	62.3839	80.5197	51.4433	39.3813	63.1462	71.3439	51.3236	0.719383	-0.475168	0.0811651	0.170025
ENSMUST00000140585.7	Mknk1	Mknk1-206	chr4:115839260-115863261	+	processed_transcript	50.311	123.4	126.25	100.487	34.7286	80.3886	99.987	71.868	0.718774	-0.47639	0.42331	0.54571
ENSMUST00000167429.1	Ggnbp2	Ggnbp2-209	chr11:84868880-84870779	-	processed_transcript	106.311	90.8624	82.9729	60.7982	58.6564	80.219	93.3822	66.5579	0.712747	-0.488538	0.050513	0.121763
ENSMUST00000132906.7	Necap2	Necap2-205	chr4:141066512-141078342	-	processed_transcript	325.076	312.269	1	1	154.66	233.491	212.781	129.717	0.609625	-0.714005	0.545886	0.652782
ENSMUST00000124596.1	Gps2	Gps2-204	chr11:69914845-69915880	+	processed_transcript	85.2768	46.4367	49.3467	20.7622	36.919	90.4961	60.3534	49.3924	0.818386	-0.289146	0.677724	0.767792
ENSMUST00000124678.1	Mlec	Mlec-202	chr5:115148106-115151046	-	processed_transcript	24.31	36.8972	36.3059	15.4293	31.0321	24.0835	32.5044	23.5149	0.723439	-0.467057	0.21444	0.337188
ENSMUST00000142905.1	Mrc2	Mrc2-204	chr11:105329052-105332299	+	processed_transcript	41.0925	50.8768	56.5395	30.044	42.1756	33.0176	49.5029	35.079	0.708625	-0.496905	0.0678255	0.149543
ENSMUST00000130593.7	Hint2	Hint2-202	chr4:43654227-43656448	-	processed_transcript	45.0233	423.8	397.508	204.89	197.314	66.2524	288.777	156.152	0.540735	-0.887006	0.365786	0.499818
ENSMUST00000174835.1	Scnm1	Scnm1-205	chr3:95129726-95131266	-	processed_transcript	35.0931	60.0569	27.8643	2.19613	126.336	74.6106	41.0048	67.7141	1.65137	0.723664	0.513518	0.624904
ENSMUST00000226958.1	3425401B19Rik	3425401B19Rik-202	chr14:32667817-32685293	-	processed_transcript	598.024	530.918	586.541	419.033	339.679	460.756	571.828	406.489	0.71086	-0.492362	0.0158455	0.0565366
ENSMUST00000147353.1	Zfp106	Zfp106-206	chr2:120535420-120563834	-	processed_transcript	133.816	174.696	161.034	144.149	78.8537	116.425	156.515	113.142	0.722884	-0.468165	0.125071	0.231998
ENSMUST00000147543.1	Timmdc1	Timmdc1-202	chr16:38516660-38522641	-	processed_transcript	138.505	83.8095	49.4158	148.117	121.082	11.2273	90.5766	93.4756	1.03201	0.045451	0.955879	0.969348
ENSMUST00000148303.1	Fam53b	Fam53b-211	chr7:132779306-132802750	-	processed_transcript	135.561	64.7534	79.6969	56.9627	56.0089	76.8686	93.3372	63.2801	0.677973	-0.5607	0.254223	0.382435
ENSMUST00000143291.1	Gm11752	Gm11752-201	chr11:119220160-119222473	+	lincRNA	62.6067	55.0533	46.6826	30.1998	36.3167	51.4023	54.7809	39.3063	0.717518	-0.478913	0.118284	0.223775
ENSMUST00000127165.1	Rnf215	Rnf215-203	chr11:4135502-4137155	+	processed_transcript	122.665	114.226	92.4792	68.6054	67.2959	97.8514	109.79	77.9176	0.709696	-0.494728	0.0765329	0.162483
ENSMUST00000176742.1	Gm20633	Gm20633-201	chr3:96243550-96246380	-	antisense_RNA	77.7633	64.6666	76.7756	41.7184	50.5693	63.7297	73.0685	52.0058	0.71174	-0.490577	0.0513214	0.123122
ENSMUST00000137612.1	Il10rb	Il10rb-202	chr16:91406444-91414632	+	processed_transcript	342.707	384.679	371.875	209.825	309.51	262.303	366.42	260.546	0.711058	-0.491962	0.0278702	0.0805566
ENSMUST00000133448.1	Bak1	Bak1-203	chr17:27022576-27028587	-	processed_transcript	18.8752	38.9383	12.0409	39.4705	77.8384	1	23.2848	39.4363	1.69365	0.760137	0.531396	0.640319
ENSMUST00000138409.2	Naglu	Naglu-202	chr11:101071963-101076806	+	processed_transcript	16.9379	1	15.2805	1	89.8262	1	11.0728	30.6087	2.76432	1.46693	0.550914	0.65708
ENSMUST00000151936.1	Gas2l1	Gas2l1-205	chr11:5064417-5065294	-	processed_transcript	155.318	193.805	116.15	82.6539	103.198	142.093	155.091	109.315	0.704843	-0.504626	0.182237	0.300036
ENSMUST00000123087.7	Sp3os	Sp3os-201	chr2:72979424-72988677	+	antisense_RNA	116.528	342.561	216.599	139.784	194.077	110.369	225.229	148.076	0.657449	-0.60505	0.331253	0.465509
ENSMUST00000130569.1	Trpv2	Trpv2-203	chr11:62575547-62581304	+	processed_transcript	58.6091	62.8972	56.9059	33.085	46.8598	46.5938	59.4707	42.1796	0.709249	-0.495636	0.0240168	0.0729334
ENSMUST00000125518.1	Gm13563	Gm13563-201	chr2:26381526-26387258	+	antisense_RNA	33.5083	36.7875	29.7914	19.185	21.5607	30.4911	33.3624	23.7456	0.711748	-0.490562	0.0735959	0.158248
ENSMUST00000153819.1	Ninj1	Ninj1-205	chr13:49190296-49196244	+	processed_transcript	15.0925	20.6297	3.00632	3.89795	1.05937	77.7542	12.9095	27.5705	2.13567	1.09469	0.598038	0.700352
ENSMUST00000159637.7	AI480526	AI480526-202	chr5:123136226-123141089	-	lincRNA	165.48	166.594	157.531	89.0894	132.089	126.304	163.201	115.827	0.70972	-0.494679	0.0262947	0.0778334
ENSMUST00000147782.1	Rps27a	Rps27a-204	chr11:29545846-29546671	-	processed_transcript	744.998	770.601	872.2	358.536	631.719	754.35	795.933	581.535	0.730633	-0.452782	0.15696	0.271834
ENSMUST00000139085.1	Tmem256	Tmem256-204	chr11:69838563-69839612	+	processed_transcript	228.635	228.329	166.909	78.3577	215.336	175.037	207.958	156.244	0.751324	-0.412493	0.319485	0.452888
ENSMUST00000181389.1	Gm16008	Gm16008-203	chr4:156022008-156023824	-	antisense_RNA	76.291	76.3732	14.1508	44.6521	16.3994	38.0432	55.605	33.0316	0.594039	-0.75137	0.370867	0.504028
ENSMUST00000127183.7	Pla2g5	Pla2g5-205	chr4:138800570-138812211	-	processed_transcript	77.5674	48.5668	68.8962	33.8167	31.5463	82.1741	65.0101	49.1791	0.756483	-0.402621	0.442952	0.564246
ENSMUST00000227391.1	Ankrd33b	Ankrd33b-206	chr15:31324527-31325249	-	processed_transcript	31.1878	6.49185	40.0681	35.6466	3.09473	24.8178	25.9159	21.1864	0.817504	-0.290702	0.750341	0.822502
ENSMUST00000224968.1	Cdadc1	Cdadc1-206	chr14:59592464-59597946	-	processed_transcript	97.4994	75.6737	73.4142	55.7773	63.6427	51.4573	82.1958	56.9591	0.692969	-0.529137	0.0407223	0.104195
ENSMUST00000155463.1	Nr2f6	Nr2f6-207	chr8:71374653-71375790	-	processed_transcript	60.6194	150.879	99.6805	60.2901	65.565	77.7088	103.726	67.8546	0.654169	-0.612265	0.249342	0.377459
ENSMUST00000148807.8	Tmem134	Tmem134-211	chr19:4125979-4131735	+	processed_transcript	66.0469	47.0534	26.259	48.7974	14.7356	38.1567	46.4531	33.8966	0.729694	-0.454637	0.457151	0.574919
ENSMUST00000225058.1	AC157650.3	AC157650.3-201	chr14:25459980-25462387	+	sense_intronic	171.556	171.585	158.988	105.191	113.113	132.027	167.377	116.777	0.697689	-0.519344	0.00491693	0.0279273
ENSMUST00000188519.1	Gm7160	Gm7160-202	chr1:105989226-105990252	-	lincRNA	180.177	150.144	173.37	85.9549	111.926	163.396	167.897	120.426	0.717261	-0.47943	0.124775	0.231534
ENSMUST00000098781.2	AA386476	AA386476-201	chr8:47675391-47677055	+	bidirectional_promoter_lncRNA	52.5677	27.1607	34.7447	21.139	26.3373	29.7853	38.1577	25.7538	0.674932	-0.567186	0.193206	0.312881
ENSMUST00000147302.1	Rnf38	Rnf38-213	chr4:44158973-44167492	-	processed_transcript	25.2458	17.9341	8.67248	1	50.8802	25.7594	17.2841	25.8799	1.49732	0.582385	0.601405	0.703151
ENSMUST00000124844.7	Myh9	Myh9-203	chr15:77794652-77813231	-	processed_transcript	64.1808	50.7531	56.8846	38.8994	38.3485	41.4308	57.2728	39.5596	0.690721	-0.533825	0.0113924	0.0453715
ENSMUST00000187323.1	Cbfb	Cbfb-206	chr8:105171564-105194535	+	processed_transcript	102.511	96.0313	70.6839	43.5603	53.9457	98.6834	89.7421	65.3965	0.728716	-0.456572	0.279961	0.410012
ENSMUST00000125766.7	Ivd	Ivd-202	chr2:118874307-118880579	+	processed_transcript	105.838	60.8626	82.7392	43.5578	63.9704	63.7157	83.1466	57.0813	0.686514	-0.54264	0.149614	0.262908
ENSMUST00000131803.1	Ankrd13a	Ankrd13a-203	chr5:114799457-114806200	+	processed_transcript	16.142	12.4754	1	66.932	1	1	9.87245	22.9773	2.32742	1.21873	0.590659	0.694131
ENSMUST00000200637.1	Cdk14	Cdk14-215	chr5:5299787-5380193	-	processed_transcript	26.3036	31.8236	44.4395	11.5376	31.6794	33.604	34.1889	25.607	0.748986	-0.41699	0.387874	0.516823
ENSMUST00000141277.7	Anp32a	Anp32a-208	chr9:62344063-62373596	+	processed_transcript	41.2078	65.5003	64.9981	18.4153	56.9726	55.1448	57.2354	43.5109	0.76021	-0.395531	0.409079	0.533784
ENSMUST00000217670.1	Srp54a	Srp54a-208	chr12:55155370-55164598	+	processed_transcript	338.613	71.4549	214.172	114.052	269.534	55.5187	208.08	146.368	0.703423	-0.507536	0.571196	0.676785
ENSMUST00000227999.1	Trio	Trio-212	chr15:27730651-27742323	-	processed_transcript	310.238	225.295	23.6993	46.2097	104.285	113.018	186.411	87.8373	0.471203	-1.08558	0.323034	0.456891
ENSMUST00000195913.1	Tet2	Tet2-202	chr3:133538762-133544286	-	processed_transcript	35.4517	69.3583	62.1785	44.437	17.1122	66.0577	55.6628	42.5356	0.764166	-0.388042	0.49536	0.608838
ENSMUST00000127572.1	Zfp644	Zfp644-210	chr5:106690591-106696546	-	processed_transcript	30.4219	66.9507	48.4371	44.4941	20.7839	35.0209	48.6032	33.433	0.687876	-0.53978	0.294864	0.426018
ENSMUST00000226073.1	Atxn7	Atxn7-209	chr14:14013144-14070403	+	processed_transcript	41.3498	12.1613	16.6045	142.673	6.53581	2.93814	23.3719	50.7156	2.16994	1.11766	0.591	0.694208
ENSMUST00000122886.7	Gas2l1	Gas2l1-204	chr11:5054132-5065294	-	processed_transcript	40.9785	53.2122	47.6451	45.1914	16.1017	46.5903	47.2786	35.9611	0.760622	-0.394748	0.343728	0.476528
ENSMUST00000127917.1	3110053B16Rik	3110053B16Rik-201	chr12:20876750-20921228	-	processed_transcript	16.5932	22.7443	26.061	1	54.595	58.5579	21.7995	38.0509	1.7455	0.803637	0.43536	0.557536
ENSMUST00000185424.1	A930005H10Rik	A930005H10Rik-202	chr3:115881583-115887952	-	antisense_RNA	224.833	247.068	282.874	164.067	183.982	168.891	251.592	172.313	0.684893	-0.546049	0.011518	0.045763
ENSMUST00000218379.1	AC153504.1	AC153504.1-201	chr10:99105791-99108080	-	bidirectional_promoter_lncRNA	81.9429	66.2583	82.5886	53.6623	41.0104	65.9486	76.9299	53.5404	0.695964	-0.522916	0.0594479	0.136074
ENSMUST00000147143.1	Rpl7a	Rpl7a-206	chr2:26912619-26913318	+	processed_transcript	71.1819	72.6205	18.0125	5.8648	80.9842	63.3995	53.9383	50.0828	0.928521	-0.106994	0.900444	0.931507
ENSMUST00000209166.1	2310010J17Rik	2310010J17Rik-203	chr7:90124831-90129940	-	bidirectional_promoter_lncRNA	248.366	189.895	187.669	190.056	107.031	140.343	208.643	145.81	0.698848	-0.51695	0.114741	0.218799
ENSMUST00000148871.1	Ptpn11	Ptpn11-204	chr5:121133840-121143635	-	processed_transcript	36.2178	44.6494	38.2295	23.3284	32.5568	26.2465	39.6989	27.3773	0.689623	-0.536121	0.0297317	0.0842455
ENSMUST00000204178.1	Skap2	Skap2-204	chr6:51874472-51933440	-	processed_transcript	4.50876	57.3976	32.6207	27.7832	1.97241	49.5954	31.509	26.4503	0.839453	-0.252479	0.817786	0.876038
ENSMUST00000224758.1	Rmi1	Rmi1-203	chr13:58402943-58407056	+	processed_transcript	152.454	166.393	109.781	60.5917	128.978	114.3	142.876	101.29	0.708935	-0.496275	0.196625	0.316789
ENSMUST00000160409.1	Wdr41	Wdr41-204	chr13:94976438-95014477	+	processed_transcript	9.81966	6.98109	11.3172	65.3412	3.80459	1	9.37264	23.3819	2.4947	1.31887	0.541831	0.648704
ENSMUST00000144871.1	Snapc4	Snapc4-209	chr2:26373562-26374738	-	processed_transcript	49.368	29.2691	46.0785	46.5626	36.8549	12.4028	41.5719	31.9401	0.76831	-0.380239	0.464288	0.582006
ENSMUST00000222895.1	D130020L05Rik	D130020L05Rik-205	chr12:101082451-101085007	+	antisense_RNA	42.4159	35.6661	32.4744	35.3589	23.0657	19.2544	36.8521	25.893	0.702618	-0.509187	0.125625	0.232854
ENSMUST00000172672.7	Znrd1as	Znrd1as-202	chr17:36958619-36964941	+	processed_transcript	43.2191	87.0013	102.179	35.5483	62.2258	55.5163	77.4666	51.0968	0.659598	-0.600341	0.245778	0.373411
ENSMUST00000207159.1	Tmem126a	Tmem126a-204	chr7:90450712-90457102	-	processed_transcript	33.0529	35.4649	73.1581	36.3584	48.7674	15.4511	47.2253	33.5256	0.709908	-0.494296	0.445904	0.566716
ENSMUST00000162924.1	Commd1	Commd1-206	chr11:22900023-22972859	-	processed_transcript	37.8459	82.1894	46.821	38.5377	32.0301	37.6427	55.6188	36.0702	0.648525	-0.624766	0.226435	0.350685
ENSMUST00000147511.1	Vps13d	Vps13d-208	chr4:144974926-144983961	-	processed_transcript	31.5208	47.3988	58.9814	13.309	69.2161	30.4836	45.967	37.6696	0.819491	-0.287199	0.674582	0.766128
ENSMUST00000138081.1	Adi1	Adi1-203	chr12:28677805-28679737	+	processed_transcript	36.9007	64.8542	44.849	38.7877	34.7243	25.3938	48.868	32.9686	0.674646	-0.567798	0.159463	0.274377
ENSMUST00000214213.1	Pts	Pts-204	chr9:50522259-50528640	-	processed_transcript	37.2039	66.2408	41.4541	36.7514	77.6527	11.3853	48.2996	41.9298	0.868119	-0.204035	0.780014	0.847651
ENSMUST00000156795.1	Aifm1	Aifm1-205	chrX:48474945-48482896	-	processed_transcript	102.169	214.853	43.5387	33.5363	85.5979	105.82	120.187	74.9848	0.623901	-0.680611	0.454924	0.572977
ENSMUST00000225700.1	Ints6	Ints6-207	chr14:62702490-62704898	-	processed_transcript	12.3359	59.9482	14.7198	17.3142	76.4937	2.60997	29.0013	32.1393	1.1082	0.14822	0.914283	0.940608
ENSMUST00000135793.1	Git2	Git2-210	chr5:114733216-114734166	-	processed_transcript	161.973	166.859	218.203	167.629	80.9761	137.927	182.345	128.844	0.706595	-0.501044	0.160927	0.276048
ENSMUST00000152697.2	Prss36	Prss36-206	chr7:127932638-127935519	-	processed_transcript	61.7988	77.8253	41.4453	34.1336	39.0427	47.3727	60.3565	40.183	0.665761	-0.586924	0.146403	0.258981
ENSMUST00000126078.1	Tln1	Tln1-204	chr4:43555564-43555946	-	processed_transcript	55.0027	30.7529	36.5706	42.4289	26.8191	17.2079	40.7754	28.8186	0.706764	-0.500699	0.312909	0.445825
ENSMUST00000153796.1	Nat9	Nat9-209	chr11:115184500-115187262	-	processed_transcript	40.2887	73.129	66.9855	46.1396	45.8269	29.5322	60.1344	40.4996	0.673484	-0.570283	0.162247	0.277461
ENSMUST00000148725.1	Ubac1	Ubac1-207	chr2:26008895-26010953	-	processed_transcript	86.547	150.845	112.866	46.4526	75.8045	132.304	116.753	84.8538	0.726783	-0.460404	0.366484	0.500501
ENSMUST00000149341.7	Josd2	Josd2-215	chr7:44468089-44469848	+	processed_transcript	110.336	90.7685	96.946	92.2356	49.5395	66.6216	99.3501	69.4656	0.6992	-0.516223	0.0943541	0.189159
ENSMUST00000156556.1	Tmem256	Tmem256-205	chr11:69838555-69839447	+	processed_transcript	40.842	36.6924	31.7765	6.88256	49.6038	43.6425	36.437	33.3763	0.916	-0.12658	0.833122	0.88756
ENSMUST00000134473.1	Zfp664	Zfp664-204	chr5:124884569-124888630	+	processed_transcript	20.832	173.108	20.2477	16.3554	10.3359	135.045	71.396	53.9121	0.755114	-0.405233	0.801476	0.862786
ENSMUST00000142686.1	Dhrs7c	Dhrs7c-203	chr11:67798277-67799066	+	processed_transcript	121.036	78.3527	99.6898	57.5201	90.4842	56.7872	99.6928	68.2638	0.684742	-0.546368	0.131114	0.240288
ENSMUST00000224242.1	Fam149b	Fam149b-208	chr14:20351371-20354961	+	processed_transcript	31.3836	42.2569	44.8675	31.133	22.6455	26.3426	39.5027	26.707	0.676081	-0.564731	0.0562014	0.130903
ENSMUST00000123001.1	Phb	Phb-202	chr11:95671450-95676060	+	processed_transcript	66.3622	48.3261	88.735	48.327	41.3774	44.2935	67.8078	44.666	0.658715	-0.602274	0.122777	0.229347
ENSMUST00000135388.1	Ppp1r16a	Ppp1r16a-205	chr15:76671647-76690809	+	processed_transcript	48.3324	82.662	58.5396	20.4761	80.9693	43.8694	63.178	48.4383	0.766695	-0.383275	0.508796	0.621108
ENSMUST00000145846.1	Vmp1	Vmp1-206	chr11:86585020-86586994	-	processed_transcript	132.656	103.098	126.361	64.473	149.744	55.5644	120.705	89.9271	0.745016	-0.424656	0.381614	0.511051
ENSMUST00000155524.1	Ipo13	Ipo13-206	chr4:117894627-117895114	-	processed_transcript	40.3915	72.3661	58.3646	67.6141	32.5355	24.0496	57.0407	41.3997	0.725793	-0.462371	0.389784	0.518134
ENSMUST00000152277.7	Ddb2	Ddb2-205	chr2:91211572-91235331	-	processed_transcript	31.1531	44.5516	25.0022	30.0097	12.454	28.7696	33.569	23.7445	0.707333	-0.499539	0.290924	0.421777
ENSMUST00000217563.1	Zfp810	Zfp810-204	chr9:22290553-22306968	-	processed_transcript	59.5158	49.0201	77.5902	38.163	22.5854	81.1559	62.042	47.3014	0.762409	-0.391363	0.489682	0.604365
ENSMUST00000146477.1	Tm9sf4	Tm9sf4-207	chr2:153195530-153198917	+	processed_transcript	51.9534	45.3136	77.802	32.7338	24.644	70.1252	58.3564	42.501	0.728301	-0.457393	0.407772	0.533045
ENSMUST00000156247.1	Tmbim4	Tmbim4-209	chr10:120201590-120203215	+	processed_transcript	35.6386	42.6461	34.2359	25.5495	25.0274	25.088	37.5069	25.2216	0.672454	-0.572493	0.0092175	0.0399637
ENSMUST00000132767.1	Sorbs2	Sorbs2-211	chr8:45763846-45799741	+	processed_transcript	113.146	108.794	92.7673	118.073	92.5833	32.199	104.902	80.9519	0.771688	-0.373911	0.412457	0.537218
ENSMUST00000101007.2	9330160F10Rik	9330160F10Rik-201	chr11:69057718-69060483	-	antisense_RNA	39.6396	40.085	43.2824	29.6151	24.1583	29.5607	41.0023	27.778	0.677475	-0.561761	0.00350139	0.0235514
ENSMUST00000127898.7	Ccm2l	Ccm2l-203	chr2:153065955-153081735	+	processed_transcript	413.967	449.216	446.058	324.323	273.498	287.526	436.414	295.116	0.676229	-0.564417	0.00170464	0.017176
ENSMUST00000097947.3	Gm10575	Gm10575-201	chr7:141461483-141467771	-	processed_transcript	53.6142	40.6184	60.1699	20.7516	54.843	35.3681	51.4675	36.9876	0.718659	-0.476621	0.273751	0.403499
ENSMUST00000127721.7	Cbx6	Cbx6-204	chr15:79832572-79834325	-	processed_transcript	42.2474	34.2287	90.813	19.4718	44.0613	46.9835	55.763	36.8389	0.660632	-0.59808	0.391424	0.51963
ENSMUST00000209965.1	Rpl13a	Rpl13a-208	chr7:45127496-45128153	-	processed_transcript	123.42	135.254	110.58	47.8354	74.0417	159.86	123.084	93.9122	0.76299	-0.390264	0.446288	0.566633
ENSMUST00000151893.1	Zfp771	Zfp771-202	chr7:127245101-127245711	+	processed_transcript	17.4305	59.7758	39.4824	20.6056	28.8031	21.2276	38.8962	23.5454	0.60534	-0.724183	0.287017	0.416832
ENSMUST00000218958.1	Smc6	Smc6-209	chr12:11266508-11270731	+	processed_transcript	64.9942	33.5951	47.134	31.2189	32.283	31.2492	48.5744	31.5837	0.650213	-0.621016	0.135264	0.245219
ENSMUST00000192627.2	Qars	Qars-214	chr9:108513130-108513963	+	processed_transcript	28.1812	24.7071	31.2258	32.3464	24.0268	8.55328	28.0381	21.6421	0.771884	-0.373543	0.4258	0.548219
ENSMUST00000187967.1	1700120C14Rik	1700120C14Rik-202	chr15:99251788-99262044	+	antisense_RNA	427.137	258.263	413.27	192.408	280.492	257.87	366.224	243.59	0.66514	-0.588271	0.11143	0.213616
ENSMUST00000198185.1	Map4	Map4-210	chr9:110062599-110068752	+	processed_transcript	90.7959	37.9076	52.2667	33.1155	25.5654	64.8	60.3234	41.1603	0.682327	-0.551464	0.388886	0.517487
ENSMUST00000174800.1	Cog4	Cog4-214	chr8:110847051-110853792	+	processed_transcript	7.11009	22.2928	157.136	261.133	29.0343	1	62.1795	97.0558	1.5609	0.642376	0.732746	0.807785
ENSMUST00000162361.1	Vangl1	Vangl1-207	chr3:102163363-102165940	-	processed_transcript	8.63736	24.4845	21.7532	1	41.4465	33.7804	18.2917	25.409	1.3891	0.47415	0.62176	0.721923
ENSMUST00000153157.7	Ccdc43	Ccdc43-204	chr11:102688319-102697734	-	processed_transcript	159.752	94.3013	104.061	75.2246	57.392	110.425	119.371	81.0139	0.678671	-0.559217	0.209247	0.331296
ENSMUST00000151825.1	Gm16062	Gm16062-201	chr11:59810080-59818491	+	antisense_RNA	46.8139	33.4841	36.7064	26.2014	37.6864	17.6946	39.0015	27.1941	0.697259	-0.520233	0.169197	0.285566
ENSMUST00000227351.1	Gm26782	Gm26782-205	chr14:50870324-50880603	+	antisense_RNA	265.347	137.938	366.379	196.439	129.771	159.474	256.555	161.895	0.631033	-0.664212	0.241142	0.367921
ENSMUST00000127559.1	Slc2a4rg-ps	Slc2a4rg-ps-201	chr2:181384250-181387586	+	processed_transcript	92.6856	94.6232	78.5619	52.6942	48.8119	80.8904	88.6235	60.7988	0.686035	-0.543646	0.0695907	0.152368
ENSMUST00000180639.1	A330009N23Rik	A330009N23Rik-201	chr15:101221196-101224121	-	lincRNA	129.097	97.5242	106.607	60.0674	86.1741	78.1678	111.076	74.8031	0.67344	-0.57038	0.0405488	0.103803
ENSMUST00000123071.1	Phb	Phb-203	chr11:95667000-95671642	+	processed_transcript	31.5859	38.5107	34.5185	10.5081	51.0968	23.4181	34.8717	28.341	0.812722	-0.299166	0.619141	0.720211
ENSMUST00000175979.1	Akap7	Akap7-204	chr10:25169090-25238717	-	processed_transcript	249.263	1.72935	39.4806	5.59309	22.2877	40.8803	96.8242	22.9204	0.236722	-2.07874	0.395204	0.522994
ENSMUST00000146677.1	Dda1	Dda1-208	chr8:71470411-71476098	+	processed_transcript	146.403	77.4316	89.8412	44.7738	59.3949	114.626	104.559	72.9314	0.697517	-0.5197	0.351951	0.485257
ENSMUST00000154471.7	C130046K22Rik	C130046K22Rik-202	chr11:103697724-103703016	+	processed_transcript	80.7433	37.6686	56.526	24.4325	51.4634	40.8507	58.3127	38.9155	0.66736	-0.583463	0.258516	0.386585
ENSMUST00000123354.7	Prkar1a	Prkar1a-204	chr11:109649405-109653961	+	processed_transcript	60.4757	67.9825	68.4197	26.1769	71.3917	44.9635	65.626	47.5107	0.723962	-0.466014	0.246777	0.374589
ENSMUST00000220125.1	2310015A10Rik	2310015A10Rik-204	chr12:80120549-80132596	-	processed_transcript	61.957	62.4622	84.3039	32.0449	45.3816	66.9244	69.5744	48.117	0.69159	-0.532011	0.162499	0.277798
ENSMUST00000203470.1	Rabgap1	Rabgap1-209	chr2:37451636-37453788	+	processed_transcript	36.8565	45.1275	53.4872	23.2336	25.3698	44.9666	45.1571	31.19	0.6907	-0.533868	0.172451	0.288257
ENSMUST00000139386.1	Huwe1	Huwe1-214	chrX:151800883-151804511	+	processed_transcript	89.545	135.546	97.6448	50.1986	65.8179	106.618	107.579	74.2115	0.689835	-0.535676	0.203897	0.324662
ENSMUST00000188271.1	2310068J16Rik	2310068J16Rik-201	chr15:99972164-99973287	-	antisense_RNA	60.1197	27.6385	27.8801	24.3558	30.3067	18.6488	38.5461	24.4371	0.633971	-0.657511	0.279902	0.410045
ENSMUST00000138837.1	Gpbp1l1	Gpbp1l1-204	chr4:116581353-116588794	+	processed_transcript	20.767	49.3527	26.5515	17.3725	60.6275	7.6636	32.2237	28.5546	0.886134	-0.174403	0.852225	0.89973
ENSMUST00000208685.1	A930016O22Rik	A930016O22Rik-202	chr7:19417466-19421417	-	antisense_RNA	19.2471	30.6886	14.1143	11.4223	65.8292	3.28396	21.35	26.8452	1.25738	0.330424	0.799396	0.861467
ENSMUST00000185335.1	Gm28651	Gm28651-201	chr14:32685648-32687516	+	lincRNA	85.6612	71.6477	98.6653	83.3537	41.6767	51.5562	85.3247	58.8622	0.689861	-0.535622	0.14823	0.261296
ENSMUST00000225961.1	Micu2	Micu2-205	chr14:57916261-57919932	-	processed_transcript	21.6761	46.0435	60.9074	23.2606	28.2883	27.3139	42.8757	26.2876	0.613112	-0.705777	0.223914	0.347743
ENSMUST00000215281.1	Fxyd6	Fxyd6-202	chr9:45370442-45377348	+	processed_transcript	35.3818	34.1565	38.4811	23.1626	25.16	23.5841	36.0065	23.9689	0.665684	-0.587091	0.00107069	0.0142326
ENSMUST00000201139.3	Ubl3	Ubl3-203	chr5:148509269-148551664	-	processed_transcript	62.1881	28.3337	33.1867	27.1564	13.8182	46.0418	41.2362	29.0055	0.703399	-0.507585	0.43495	0.557293
ENSMUST00000141010.1	Drosha	Drosha-202	chr15:12878708-12885230	+	processed_transcript	48.6646	55.2432	58.4018	61.7643	41.0725	18.2644	54.1032	40.3671	0.746113	-0.422534	0.346489	0.479563
ENSMUST00000137582.1	Gm13594	Gm13594-201	chr2:65238756-65239675	+	antisense_RNA	261.801	279.101	202.062	160.586	132.064	205.219	247.655	165.957	0.670113	-0.577523	0.0609175	0.138244
ENSMUST00000216628.1	Rpl14	Rpl14-204	chr9:120571556-120573817	+	processed_transcript	249.322	270.154	288.529	153.772	136.977	271.852	269.335	187.534	0.696284	-0.522251	0.136021	0.246147
ENSMUST00000123873.1	Notch1	Notch1-202	chr2:26468543-26469749	-	processed_transcript	14.7898	35.9686	17.5373	2.93542	45.4456	20.5978	22.7652	22.993	1.01	0.0143611	0.987808	0.991349
ENSMUST00000132365.1	Cdk16	Cdk16-206	chrX:20687999-20694362	+	processed_transcript	304.857	71.8806	150.816	71.5337	133.42	101.755	175.851	102.236	0.581379	-0.78245	0.356587	0.490575
ENSMUST00000223318.1	Rps7	Rps7-207	chr12:28631086-28632390	-	processed_transcript	335.484	413.502	500.667	176.168	326.609	353.689	416.551	285.489	0.685364	-0.545058	0.146914	0.25952
ENSMUST00000204570.1	1810059H22Rik	1810059H22Rik-205	chr5:148958598-148959704	-	lincRNA	55.0506	83.8608	59.9166	55.2362	24.5803	59.5654	66.276	46.4606	0.701018	-0.512478	0.234292	0.360086
ENSMUST00000155345.7	2210408F21Rik	2210408F21Rik-214	chr6:31220351-31337404	+	lincRNA	117.022	70.2157	129.655	54.7874	60.4087	93.6779	105.631	69.6247	0.65913	-0.601366	0.173553	0.289619
ENSMUST00000138428.7	Uqcr11	Uqcr11-202	chr10:80402997-80406766	-	processed_transcript	90.2467	138.767	110.641	49.0433	99.6062	82.3798	113.218	77.0097	0.680189	-0.555992	0.151301	0.265039
ENSMUST00000174268.1	Mocs1	Mocs1-207	chr17:49433196-49435532	+	processed_transcript	39.8427	57.0267	64.5016	27.4491	22.3916	69.1252	53.7903	39.6553	0.73722	-0.439834	0.440142	0.561376
ENSMUST00000149574.1	Gm14964	Gm14964-202	chr19:6530711-6532011	-	antisense_RNA	195.02	128.801	196.31	69.8291	101.067	202.195	173.377	124.364	0.717302	-0.479347	0.344316	0.477212
ENSMUST00000123533.7	Mrps2	Mrps2-202	chr2:28468082-28471165	+	processed_transcript	104.446	6.82116	9.36921	48.5633	3.93672	10.1022	40.2123	20.8674	0.518931	-0.946385	0.610172	0.711915
ENSMUST00000171338.7	Usf2	Usf2-210	chr7:30946580-30956757	-	processed_transcript	146.691	83.7178	177.351	67.6297	85.5891	108.798	135.92	87.339	0.642576	-0.638061	0.180989	0.298469
ENSMUST00000125235.1	Med8	Med8-205	chr4:118411437-118412523	+	processed_transcript	36.4949	67.4711	54.1565	27.6242	51.3107	27.1543	52.7075	35.3631	0.670931	-0.575764	0.221988	0.345497
ENSMUST00000150108.7	Ndufs2	Ndufs2-206	chr1:171234853-171237528	-	processed_transcript	93.0967	61.9922	55.2488	48.9452	40.9713	45.8858	70.1125	45.2674	0.64564	-0.631199	0.104774	0.204198
ENSMUST00000226643.1	AC132863.2	AC132863.2-201	chr15:73423311-73424109	+	bidirectional_promoter_lncRNA	67.4342	65.8405	43.5436	35.426	39.3712	39.8761	58.9395	38.2244	0.648537	-0.624738	0.0574252	0.133076
ENSMUST00000123275.7	Ubac1	Ubac1-202	chr2:25998543-26007920	-	processed_transcript	483.448	516.012	397.221	237.498	596.15	201.127	465.56	344.925	0.740881	-0.432685	0.409023	0.533849
ENSMUST00000150145.1	4921531C22Rik	4921531C22Rik-201	chr2:179976853-179979013	+	processed_transcript	112.817	91.3503	151.211	83.0776	61.3088	87.8087	118.459	77.3984	0.653376	-0.614016	0.100701	0.198177
ENSMUST00000141613.7	Paxx	Paxx-212	chr2:25459485-25460279	-	processed_transcript	87.2156	82.9294	67.8208	25.6784	44.2324	123.918	79.3219	64.6097	0.814525	-0.295969	0.656829	0.751557
ENSMUST00000153807.1	Dnajb5	Dnajb5-207	chr4:42950440-42953302	+	processed_transcript	29.1058	58.8595	87.1991	24.3951	58.2918	30.1159	58.3881	37.601	0.643983	-0.634906	0.352483	0.485857
ENSMUST00000181167.2	Gm16675	Gm16675-201	chr8:46730970-46739515	-	bidirectional_promoter_lncRNA	33.2629	49.0981	25.5762	18.686	22.4692	28.4752	35.9791	23.2101	0.645101	-0.632404	0.163357	0.278792
ENSMUST00000149040.1	Mrpl14	Mrpl14-203	chr17:45686357-45698178	+	processed_transcript	34.1388	53.8887	27.0105	8.16681	33.7176	51.6136	38.346	31.166	0.812757	-0.299104	0.656159	0.750961
[truncated: 3,039 more rows]

## Sheet: TAC vs PUE
Symbol	Gene_Name	Trans_Name	Locus	Strand	Trans_Type	PUE1（TPM）	PUE2（TPM）	PUE3（TPM）	TAC1（TPM）	TAC2（TPM）	TAC3+1	AVG PUE	AVG TAC	Fold_Change	logFC	p_value	adj.P.Val
ENSMUST00000212580.1	Arl2bp	Arl2bp-205	chr8:94666724-94672095	+	processed_transcript	42.0935	44.9106	37.5119	1	1	1	41.5053	1	41.5053	5.37522	4.72638e-05	0.0308573
ENSMUST00000225249.1	Aldh1a1	Aldh1a1-204	chr19:20492760-20541377	+	processed_transcript	44.6511	41.8007	37.4537	1	1	1	41.3018	1	41.3018	5.36813	4.28413e-05	0.0319658
ENSMUST00000128733.1	Rpl11	Rpl11-203	chr4:136051241-136053428	-	processed_transcript	25.8036	48.0194	37.435	232.982	210.489	228.29	37.086	223.92	0.165622	-2.59404	3.75805e-05	0.0327138
ENSMUST00000162826.1	Airn	Airn-206	chr17:12741330-12830250	+	antisense_RNA	65.2532	54.2823	62.9303	1	1	1	60.822	1	60.822	5.92652	5.69683e-05	0.0330606
ENSMUST00000150425.1	Ablim1	Ablim1-220	chr19:57116022-57119024	-	processed_transcript	137.76	147.419	141.502	24.9773	33.7188	40.5634	142.227	33.0865	4.29864	2.10388	3.3222e-05	0.0347037
ENSMUST00000180385.1	2900076A07Rik	2900076A07Rik-201	chr7:81523563-81530146	+	lincRNA	53.194	55.3275	58.1579	7.10914	4.75625	10.6619	55.5598	7.5091	7.39899	2.88733	2.78828e-05	0.036408
ENSMUST00000142342.7	Ttc4	Ttc4-209	chr4:106662260-106678686	-	processed_transcript	469.116	409.854	442.372	1	1	9.21077	440.447	3.73692	117.864	6.88097	1.47973e-05	0.038643
ENSMUST00000161582.7	Nav3	Nav3-204	chr10:109682660-109823585	-	processed_transcript	129.515	120.926	140.679	1	1	4.11453	130.374	2.03818	63.9658	5.99923	2.48945e-05	0.0433413
ENSMUST00000146280.1	Cnot7	Cnot7-210	chr8:40507318-40511722	-	processed_transcript	70.3321	70.3776	84.3411	1.00891	1.02471	2.29736	75.017	1.44366	51.963	5.69941	9.57667e-05	0.0454718
ENSMUST00000149874.7	Cflar	Cflar-210	chr1:58711508-58713886	+	processed_transcript	160.765	153.514	138.891	29.6183	33.8711	41.5618	151.057	35.0171	4.31381	2.10896	9.25891e-05	0.0483593
ENSMUST00000210581.1	Gm45353	Gm45353-201	chr8:122339171-122343100	+	lincRNA	86.8333	93.6415	100.925	33.556	30.3741	36.5144	93.8	33.4815	2.80155	1.48622	0.000169693	0.0521357
ENSMUST00000138946.1	Scube2	Scube2-205	chr7:109800650-109808231	-	processed_transcript	356.228	337.509	306.781	611.851	653.84	591.763	333.506	619.151	0.53865	-0.892579	0.00025361	0.0529842
ENSMUST00000151056.7	Coasy	Coasy-203	chr11:101082618-101085620	+	processed_transcript	1	1	1	39.5274	34.9793	30.9267	1	35.1444	0.028454	-5.13522	0.000162345	0.0529955
ENSMUST00000059704.4	4632415L05Rik	4632415L05Rik-201	chr3:19894886-19895962	+	lincRNA	1.11003	26.1828	1.15963	243.082	301.557	245.126	9.48414	263.255	0.0360265	-4.7948	0.00026401	0.0530355
ENSMUST00000151359.1	Ccng1	Ccng1-202	chr11:40749090-40753938	-	processed_transcript	1	1	1	28.2795	34.1347	36.4703	1	32.9615	0.0303384	-5.04271	0.000194907	0.053579
ENSMUST00000136128.7	Setd5	Setd5-206	chr6:113077561-113106319	+	processed_transcript	70.1302	57.666	56.5113	3.58684	2.86067	8.53209	61.4358	4.9932	12.3039	3.62104	0.000277905	0.0537591
ENSMUST00000152579.7	Fstl1	Fstl1-206	chr16:37777055-37799471	+	processed_transcript	135.387	109.059	133.334	16.5141	22.7044	18.3003	125.927	19.173	6.56794	2.71544	0.000247961	0.0539625
ENSMUST00000211494.1	Rpl13a	Rpl13a-219	chr7:45126478-45126987	-	processed_transcript	10.7566	10.3885	10.184	21.0173	22.8998	24.3831	10.443	22.7667	0.458697	-1.12439	0.000237777	0.053996
ENSMUST00000168343.7	Slc35a4	Slc35a4-203	chr18:36679592-36680959	+	processed_transcript	39.215	35.3878	34.4003	8.48082	11.8496	6.97645	36.3344	9.10229	3.99179	1.99703	0.000188117	0.0545853
ENSMUST00000210929.1	Acsl1	Acsl1-209	chr8:46471183-46534684	+	processed_transcript	86.3128	77.2372	82.4679	38.3384	38.4423	42.9505	82.006	39.9104	2.05475	1.03897	0.000157234	0.0547489
ENSMUST00000130217.1	Zfp672	Zfp672-205	chr11:58319738-58323314	-	processed_transcript	58.4413	63.298	57.124	1	1	11.1143	59.6211	4.37143	13.6388	3.76964	0.000138258	0.055548
ENSMUST00000181242.1	Gm26870	Gm26870-201	chr9:3000282-3018084	-	lincRNA	33.5617	41.838	43.5705	1	1	1	39.6567	1	39.6567	5.30949	0.000234347	0.0556361
ENSMUST00000227412.1	AC140209.1	AC140209.1-203	chr15:60144270-60187408	-	lincRNA	45.4003	39.8799	44.3458	3.7089	10.0143	10.4244	43.2087	8.04919	5.36807	2.4244	0.000217019	0.0566744
ENSMUST00000159706.7	Gas5	Gas5-210	chr1:161035067-161038537	+	lincRNA	430.154	449.952	481.421	50.2338	102.399	121.439	453.842	91.3574	4.96777	2.3126	0.000153422	0.0572372
ENSMUST00000131221.1	2310058D17Rik	2310058D17Rik-201	chr11:58965748-58978050	-	processed_transcript	39.2085	39.6876	38.2714	17.8144	16.907	21.947	39.0558	18.8895	2.0676	1.04795	0.000231378	0.0575471
ENSMUST00000224977.1	Tbc1d5	Tbc1d5-207	chr17:50733132-51159378	-	processed_transcript	119.544	103.396	121.737	2.7524	16.4204	1.76509	114.892	6.97931	16.4619	4.04105	0.000133512	0.0581113
ENSMUST00000134983.1	Lrrc41	Lrrc41-203	chr4:116089482-116093309	+	processed_transcript	37.1028	32.6573	28.6867	3.65207	5.74919	1.9326	32.8156	3.77795	8.68608	3.11871	0.000405508	0.0605134
ENSMUST00000134860.7	Uxs1	Uxs1-204	chr1:43774866-43827762	-	processed_transcript	46.9751	50.685	43.5626	1	8.19689	11.2735	47.0742	6.82346	6.89888	2.78636	0.000394255	0.0605645
ENSMUST00000130611.1	Ccdc73	Ccdc73-203	chr2:105017121-105017904	+	processed_transcript	137.736	135.537	147.172	33.7932	49.7234	18.6749	140.148	34.0638	4.11428	2.04064	0.000388824	0.0615402
ENSMUST00000152576.1	Gm11944	Gm11944-201	chr11:3308996-3320722	+	processed_transcript	72.274	59.2944	66.086	14.0766	13.3821	21.9169	65.8848	16.4585	4.00308	2.00111	0.000440172	0.0621356
ENSMUST00000128000.7	Snhg12	Snhg12-202	chr4:132309629-132311024	+	lincRNA	93.7959	68.5559	86.127	1	1	4.36058	82.8263	2.12019	39.0654	5.28782	0.000434848	0.0630893
ENSMUST00000195714.1	Gm37305	Gm37305-201	chr3:65957758-65962036	+	antisense_RNA	72.6927	66.9491	67.882	33.1924	39.5475	40.2474	69.1746	37.6624	1.8367	0.877116	0.000387816	0.0632988
ENSMUST00000222700.1	Hexb	Hexb-202	chr13:97183676-97198295	-	processed_transcript	46.4824	36.4176	36.389	1	3.23398	1	39.763	1.74466	22.7913	4.51041	0.000381673	0.0643057
ENSMUST00000154714.1	Sirt7	Sirt7-211	chr11:120618769-120619369	-	processed_transcript	40.2546	45.2419	43.9042	1	1	10.5454	43.1336	4.18178	10.3146	3.36662	0.000376554	0.0655581
ENSMUST00000186531.1	2810013P06Rik	2810013P06Rik-201	chr8:123042466-123044602	+	bidirectional_promoter_lncRNA	315.07	270.427	306.989	115.383	124.762	139.012	297.495	126.386	2.35387	1.23503	0.000369135	0.0664824
ENSMUST00000135456.1	Fbxw5	Fbxw5-206	chr2:25503038-25503800	+	processed_transcript	85.8303	144.912	130.089	375.95	438.992	425.845	120.277	413.596	0.290808	-1.78186	0.000359589	0.0670762
ENSMUST00000197289.1	Map4	Map4-209	chr9:109969017-110003289	+	processed_transcript	54.7432	51.0596	54.9361	17.9364	16.2068	26.1003	53.5796	20.0812	2.66815	1.41584	0.000531009	0.0711143
ENSMUST00000197415.4	Atp2a2	Atp2a2-205	chr5:122488882-122501621	-	processed_transcript	425.347	445.756	468.448	222.274	266.919	264.727	446.517	251.307	1.77678	0.829266	0.000519974	0.071469
ENSMUST00000155620.1	Vgll4	Vgll4-206	chr6:114862191-114875020	-	processed_transcript	49.232	47.7762	42.4604	9.75053	13.7033	1	46.4895	8.15129	5.70334	2.51181	0.000859669	0.0724202
ENSMUST00000210989.1	Clcn4	Clcn4-208	chr7:7298001-7299557	-	processed_transcript	31.3008	34.3919	36.9742	3.45235	10.2928	10.3855	34.2223	8.04353	4.25464	2.08904	0.000750363	0.0725768
ENSMUST00000109908.7	Nf2	Nf2-204	chr11:4781937-4833133	-	processed_transcript	41.1768	36.9954	28.4713	1.99936	1.0905	3.43284	35.5478	2.17423	16.3496	4.03118	0.000927073	0.0733652
ENSMUST00000185424.1	A930005H10Rik	A930005H10Rik-202	chr3:115881583-115887952	-	antisense_RNA	309.117	283.956	330.072	163.764	183.542	168.292	307.715	171.866	1.79044	0.840312	0.000744694	0.0733875
ENSMUST00000171451.1	Eif2ak2	Eif2ak2-203	chr17:78878115-78882554	-	processed_transcript	49.1952	43.1315	48.4232	20.2627	14.9254	23.1274	46.9166	19.4385	2.4136	1.27118	0.000858811	0.073534
ENSMUST00000147165.7	Trit1	Trit1-203	chr4:123016597-123054949	+	processed_transcript	64.3958	45.3279	60.4976	1	1	3.56893	56.7404	1.85631	30.5662	4.93387	0.000732871	0.0736113
ENSMUST00000199154.1	Zfp664	Zfp664-206	chr5:124874152-124876297	+	processed_transcript	40.1648	44.394	35.4925	14.901	14.6337	17.6024	40.0171	15.7124	2.54686	1.34872	0.000892178	0.0739658
ENSMUST00000156112.7	Nrg4	Nrg4-212	chr9:55242064-55326844	-	processed_transcript	15.717	1	6.45344	56.6137	68.7699	55.8671	7.72348	60.4169	0.127836	-2.96763	0.000924175	0.074261
ENSMUST00000209273.1	4933431K23Rik	4933431K23Rik-204	chr8:77723584-77769682	+	processed_transcript	41.746	36.7938	45.5766	10.7569	1.41453	8.326	41.3721	6.83249	6.0552	2.59818	0.000796672	0.0743039
ENSMUST00000128010.1	Akr1a1	Akr1a1-203	chr4:116636511-116651396	-	processed_transcript	187.251	184.846	225.865	59.0779	36.0883	66.9125	199.321	54.0262	3.68933	1.88336	0.000853605	0.0743063
ENSMUST00000144106.1	Dtymk	Dtymk-204	chr1:93798380-93799361	-	processed_transcript	74.573	65.2159	59.1086	1	7.7054	17.6274	66.2992	8.77761	7.55322	2.91709	0.000954124	0.0743789
ENSMUST00000156026.1	Cox17	Cox17-206	chr16:38349292-38352745	+	processed_transcript	53.0277	45.328	41.4496	8.19376	13.6036	12.235	46.6017	11.3441	4.10802	2.03844	0.000728047	0.0745606
ENSMUST00000134225.1	Tle1	Tle1-208	chr4:72167182-72200893	-	processed_transcript	60.8002	69.8227	56.563	7.23441	20.5156	15.8824	62.3953	14.5441	4.29006	2.101	0.000972262	0.0746783
ENSMUST00000140973.7	Brpf3	Brpf3-207	chr17:28823674-28838541	+	processed_transcript	1.66183	2.26819	1	48.777	67.9687	69.5592	1.64334	62.1016	0.0264621	-5.23993	0.000829698	0.0747157
ENSMUST00000156405.7	Mcf2l	Mcf2l-219	chr8:12915911-12992161	+	processed_transcript	48.8267	40.912	53.6553	5.29298	11.0134	11.4412	47.798	9.24921	5.16779	2.36955	0.000789818	0.075004
ENSMUST00000223729.1	Atg10	Atg10-202	chr13:90936006-91125610	-	processed_transcript	42.7659	58.6151	60.6031	1.81453	1	3.86704	53.9947	2.22719	24.2434	4.59952	0.000819173	0.0750621
ENSMUST00000129793.1	Map3k3	Map3k3-203	chr11:106151212-106152378	+	processed_transcript	132.702	121.909	143.057	44.8247	61.4155	59.9938	132.556	55.4113	2.39222	1.25835	0.000675614	0.0750794
ENSMUST00000161255.1	9330158H04Rik	9330158H04Rik-207	chr6:36387379-36388288	-	lincRNA	408.628	375.039	389.974	57.9127	126.014	157.272	391.214	113.733	3.43976	1.78231	0.000851063	0.0753407
ENSMUST00000134624.1	2610307P16Rik	2610307P16Rik-203	chr13:28668650-28885344	-	processed_transcript	91.8767	70.6276	64.6098	4.64719	1	1	75.7047	2.21573	34.167	5.09453	0.000923406	0.0753585
ENSMUST00000212795.1	Hsbp1	Hsbp1-203	chr8:119345245-119348691	+	processed_transcript	1180.04	1147.17	1067.81	55.8619	21.4367	110.614	1181.04	1148.17	1.02863	0.0407182	1.44662e-05	0.075557
ENSMUST00000147199.7	Pdpk1	Pdpk1-209	chr17:24088181-24093798	-	processed_transcript	54.2364	43.0034	55.6738	7.36943	13.0451	6.80708	50.9712	9.07388	5.61736	2.48989	0.000723946	0.0756234
ENSMUST00000172512.1	Wdfy3	Wdfy3-202	chr5:101935081-101937676	-	processed_transcript	33.1856	31.0606	33.5262	1	9.91682	6.80441	32.5908	5.90708	5.51725	2.46395	0.00060902	0.075736
ENSMUST00000148239.7	Gtf2a2	Gtf2a2-214	chr9:70015812-70022737	+	processed_transcript	444.748	395.677	335.941	13.717	68.9059	11.4873	392.122	31.3701	12.4999	3.64384	0.000596742	0.0760191
ENSMUST00000125194.1	Gm12092	Gm12092-201	chr11:29612324-29645509	-	lincRNA	250.266	206.607	213.012	42.0366	75.3047	42.5417	223.295	53.2943	4.18984	2.0669	0.000629316	0.0764399
ENSMUST00000138071.1	Wsb2	Wsb2-205	chr5:117361022-117370922	+	processed_transcript	63.2329	40.0659	80.7624	244.336	216.996	203.629	61.3537	221.654	0.2768	-1.85308	0.000674547	0.0765904
ENSMUST00000212699.1	Gm17435	Gm17435-202	chr8:72492944-72494941	+	antisense_RNA	60.0419	52.9528	59.8066	12.7105	14.3478	24.0384	57.6004	17.0322	3.38185	1.75781	0.000661072	0.0767284
ENSMUST00000181273.6	A330023F24Rik	A330023F24Rik-202	chr1:195017398-195036929	+	lincRNA	205.635	172.818	189.412	38.047	61.2082	71.6972	189.288	56.9841	3.32177	1.73195	0.000649016	0.0770412
ENSMUST00000160779.1	Coq9	Coq9-206	chr8:94850977-94853218	+	processed_transcript	179.699	171.384	172.533	42.806	73.9744	79.2093	174.539	65.3299	2.67165	1.41773	0.000723036	0.0770697
ENSMUST00000134427.1	Gm11613	Gm11613-201	chr11:97644184-97660367	-	processed_transcript	97.8729	96.2665	106.952	45.053	57.3269	53.2794	100.364	51.8864	1.93429	0.951808	0.000590282	0.0770761
ENSMUST00000141285.1	Slc20a1	Slc20a1-205	chr2:129198803-129205104	+	processed_transcript	301.881	305.162	336.694	62.991	118.653	124.94	314.579	102.195	3.07822	1.6221	0.000714334	0.0777285
ENSMUST00000218851.1	Fut8	Fut8-205	chr12:77410141-77475989	+	processed_transcript	51.9629	52.3062	49.4337	1.20574	1	17.6263	51.2343	6.61069	7.75022	2.95424	0.00132766	0.0787994
ENSMUST00000133657.1	Celf1	Celf1-211	chr2:90965092-90987816	+	processed_transcript	213.667	155.406	188.016	37.9182	21.9857	47.4581	185.696	35.7873	5.18888	2.37542	0.00124108	0.0790505
ENSMUST00000143341.1	Traf6	Traf6-202	chr2:101678429-101686235	+	processed_transcript	46.6298	55.9151	51.8888	15.0644	19.3715	24.7844	51.4779	19.7401	2.60778	1.38282	0.00122874	0.0792308
ENSMUST00000184126.2	2310009A05Rik	2310009A05Rik-201	chr9:73039718-73042779	+	antisense_RNA	823.57	705.502	723.96	282.339	402.7	352.338	751.011	345.792	2.17185	1.11893	0.00132085	0.0792966
ENSMUST00000133192.1	Mrpl58	Mrpl58-206	chr11:115403777-115410759	+	processed_transcript	1	1.83272	1	23.925	20.328	30.0909	1.27757	24.7813	0.0515539	-4.27777	0.00120161	0.0794432
ENSMUST00000185376.6	Mrps9	Mrps9-202	chr1:42851276-42899679	+	processed_transcript	38.2503	26.6179	35.6035	4.69309	4.82661	4.57888	33.4906	4.69953	7.12637	2.83317	0.00121806	0.0795238
ENSMUST00000002490.6	Ndufb2	Ndufb2-201	chr6:39592585-39599422	+	processed_transcript	110.486	136.359	87.5686	233.272	261.784	249.719	111.471	248.258	0.449013	-1.15517	0.00111286	0.079623
ENSMUST00000140369.1	Elac2	Elac2-206	chr11:64979091-65002067	+	processed_transcript	222.436	148.439	187.686	2.58516	7.25263	5.00586	186.187	4.94788	37.6296	5.2338	0.00106848	0.079724
ENSMUST00000151134.1	Timp3	Timp3-204	chr10:86300554-86306781	+	processed_transcript	165.516	178.135	222.22	14.9115	34.4894	43.1979	188.624	30.8662	6.111	2.61141	0.00117598	0.0797678
ENSMUST00000140527.1	Rpl30	Rpl30-205	chr15:34442521-34443259	-	processed_transcript	21.9513	19.9772	22.1153	40.4325	49.1324	49.1674	21.3479	46.2441	0.461635	-1.11517	0.0011308	0.0798132
ENSMUST00000057216.14	Mtch2	Mtch2-201	chr2:90847287-90865391	+	processed_transcript	158.983	111.687	136.793	23.6395	20.8552	29.2513	135.821	24.582	5.52523	2.46603	0.00131609	0.0799294
ENSMUST00000194395.5	Rcor3	Rcor3-212	chr1:192136397-192138010	-	processed_transcript	10.1137	14.3185	23.8616	61.9484	72.6641	59.2045	16.098	64.6057	0.249172	-2.00478	0.00110276	0.0799963
ENSMUST00000134587.1	Nckap1	Nckap1-204	chr2:80548933-80554790	-	processed_transcript	85.4192	70.6189	64.9811	15.027	10.4968	21.2442	73.6731	15.5894	4.72586	2.24058	0.00105709	0.0800172
ENSMUST00000203626.1	Zyx	Zyx-206	chr6:42350038-42351764	+	processed_transcript	153.018	120.482	117.35	16.7777	22.8809	35.8173	130.284	25.1586	5.17849	2.37253	0.00116603	0.0801337
ENSMUST00000127193.1	Ddah1	Ddah1-203	chr3:145810479-145889295	+	processed_transcript	117.955	87.1616	96.6271	1	1	21.1146	100.581	7.70486	13.0542	3.70645	0.00119784	0.080209
ENSMUST00000151166.1	2810403D21Rik	2810403D21Rik-206	chrX:108834695-108874974	+	lincRNA	48.5134	35.4681	39.6419	1	8.13727	5.5567	41.2078	4.89799	8.4132	3.07266	0.00115183	0.0802131
ENSMUST00000153150.1	Orc4	Orc4-211	chr2:48933153-48934202	-	processed_transcript	49.1969	35.8605	34.2048	1.59043	1.01564	2.1932	39.754	1.59976	24.85	4.63518	0.00131171	0.0806009
ENSMUST00000183514.1	Gm27177	Gm27177-202	chr14:69680584-69683286	-	antisense_RNA	56.5628	60.4147	56.2282	19.3603	24.1854	32.3975	57.7352	25.3144	2.28073	1.18949	0.00130303	0.0810204
ENSMUST00000128800.1	Gm13091	Gm13091-201	chr4:150566869-150568544	-	antisense_RNA	75.6252	62.9988	66.2326	19.9126	4.89608	20.376	68.2855	15.0616	4.53375	2.18071	0.00110152	0.0810312
ENSMUST00000127311.7	Ppp5c	Ppp5c-203	chr7:17009949-17024746	-	processed_transcript	48.5142	49.88	64.6177	10.8865	13.981	11.4471	54.3373	12.1049	4.48889	2.16636	0.00128932	0.081134
ENSMUST00000201371.1	Gtf2i	Gtf2i-227	chr5:134258157-134259485	-	processed_transcript	48.6453	55.3555	48.1587	9.69255	14.5575	22.6925	50.7199	15.6475	3.2414	1.69662	0.00139715	0.0819921
ENSMUST00000176201.1	Gm20707	Gm20707-201	chr4:147782319-147809840	-	lincRNA	69.5361	60.8159	78.7993	5.46635	21.2119	17.5867	69.7171	14.755	4.72499	2.24031	0.00145594	0.0826565
ENSMUST00000193640.1	Tgfb2	Tgfb2-203	chr1:186690724-186704333	-	processed_transcript	49.1892	46.4028	40.5402	11.7038	19.721	19.6911	45.3774	17.0386	2.66321	1.41317	0.00154496	0.083189
ENSMUST00000155626.7	Mtus1	Mtus1-214	chr8:41000675-41016755	-	processed_transcript	95.0925	81.301	80.9214	39.269	19.8703	24.6158	85.7716	27.9184	3.07223	1.61929	0.00149822	0.0832468
ENSMUST00000212439.1	Comp	Comp-202	chr8:70375038-70375753	+	processed_transcript	29.7805	42.1274	41.827	5.76845	6.59967	5.92032	37.9116	6.09614	6.21895	2.63667	0.00145161	0.0833162
ENSMUST00000190040.1	Gm28523	Gm28523-201	chr6:141246920-141250009	-	antisense_RNA	83.9561	88.3997	90.9396	69.3048	71.2976	72.0323	87.7651	70.8782	1.23825	0.308305	0.00154207	0.0838981
ENSMUST00000134999.1	Cltc	Cltc-205	chr11:86700938-86702430	-	processed_transcript	86.4443	66.8614	70.0433	11.7607	24.2143	8.87397	74.4497	14.9497	4.98002	2.31615	0.00149456	0.0839366
ENSMUST00000185820.6	Tctn2	Tctn2-207	chr5:124598749-124627738	+	processed_transcript	69.401	74.1847	58.0445	16.5302	27.9152	20.498	67.2101	21.6478	3.1047	1.63446	0.00145107	0.0842107
ENSMUST00000221394.1	Col4a3bp	Col4a3bp-205	chr13:96634300-96635781	+	processed_transcript	51.3247	36.7333	43.5762	6.01608	11.8852	5.35586	43.8781	7.75238	5.65995	2.50079	0.00153852	0.0845862
ENSMUST00000136801.7	Scmh1	Scmh1-210	chr4:120517626-120530184	+	processed_transcript	36.9572	38.3067	25.8563	2.38375	2.71366	4.69121	33.7067	3.26287	10.3304	3.36882	0.00161438	0.08604
ENSMUST00000164510.1	Top1	Top1-205	chr2:160702143-160703679	+	processed_transcript	55.6196	43.9684	59.1062	15.3445	19.1134	17.4497	52.8981	17.3025	3.05725	1.61223	0.0016362	0.0863218
ENSMUST00000061537.11	2810025M15Rik	2810025M15Rik-201	chr1:157412352-157420236	+	processed_transcript	534.037	541.866	554.22	369.998	429.884	410.703	543.374	403.529	1.34656	0.429276	0.00167769	0.0867581
ENSMUST00000161099.1	Birc3	Birc3-206	chr9:7866193-7872857	-	processed_transcript	102.372	69.4017	91.2659	11.1732	2.08409	14.858	87.6799	9.37176	9.35575	3.22585	0.00166734	0.087085
ENSMUST00000186381.6	Tns1	Tns1-206	chr1:73990374-74016422	-	processed_transcript	39.4129	36.1966	33.2407	8.20016	15.8021	15.8855	36.2834	13.2959	2.72892	1.44833	0.00178535	0.0879704
ENSMUST00000143016.1	Gm12207	Gm12207-201	chr11:52233724-52236619	+	antisense_RNA	46.8478	48.7313	42.0041	10.4972	22.2256	17.0621	45.8611	16.595	2.76355	1.46652	0.00175549	0.0881629
ENSMUST00000146188.1	Elk4	Elk4-205	chr1:132008099-132014598	+	processed_transcript	96.1258	102.367	101.028	34.6131	47.9299	58.215	99.8402	46.9193	2.12791	1.08944	0.00172218	0.0881857
ENSMUST00000122820.7	Spata6	Spata6-204	chr4:111720010-111807054	+	processed_transcript	57.4855	46.8659	44.1913	4.36939	11.6437	15.6583	49.5143	10.5571	4.69013	2.22963	0.00174041	0.0882539
ENSMUST00000217802.1	E130317F20Rik	E130317F20Rik-202	chr10:79851552-79854971	-	bidirectional_promoter_lncRNA	45.8146	60.3911	51.8953	22.3716	19.6238	20.6418	52.7003	20.8791	2.52408	1.33575	0.00178238	0.0886609
ENSMUST00000154858.1	Orc3	Orc3-210	chr4:34599376-34614904	-	processed_transcript	102.613	73.0657	85.8135	22.422	26.1439	17.1368	87.1642	21.9009	3.97993	1.99274	0.00187733	0.0907899
ENSMUST00000154720.1	Gm12971	Gm12971-201	chr4:130758563-130762379	+	sense_intronic	39.5038	44.1584	43.5554	2.89587	3.90227	16.8691	42.4058	7.88907	5.37527	2.42634	0.00187603	0.0915748
ENSMUST00000185881.1	Gm28417	Gm28417-202	chr1:34471509-34473112	-	antisense_RNA	42.1745	29.7921	37.4349	5.56491	10.8217	4.43569	36.4672	6.94077	5.25406	2.39343	0.00198657	0.0918216
ENSMUST00000138419.1	Pnisr	Pnisr-205	chr4:21854068-21859202	+	processed_transcript	128.375	96.6684	90.1212	22.9847	11.3998	8.7712	105.055	14.3852	7.30297	2.86848	0.00197242	0.0919819
ENSMUST00000098305.3	4632427E13Rik	4632427E13Rik-201	chr7:92737658-92741468	-	bidirectional_promoter_lncRNA	333.267	238.614	254.685	87.9325	67.0266	75.26	275.522	76.7397	3.59035	1.84412	0.0026472	0.0921754
ENSMUST00000224148.1	AV026068	AV026068-219	chr8:57304265-57320394	-	antisense_RNA	50.4413	38.1441	38.9449	93.0602	77.3275	87.5187	42.5101	85.9688	0.494483	-1.01601	0.0020309	0.0922381
ENSMUST00000228161.1	Wbp4	Wbp4-204	chr14:79460950-79472237	-	processed_transcript	75.9663	72.4301	103.842	5.31875	7.7379	15.6254	84.0795	9.56068	8.7943	3.13657	0.00201546	0.0923401
ENSMUST00000127898.7	Ccm2l	Ccm2l-203	chr2:153065955-153081735	+	processed_transcript	405.314	424.23	404.634	323.722	272.842	286.504	411.393	294.356	1.3976	0.482956	0.00208807	0.0924237
ENSMUST00000181475.1	Gm6297	Gm6297-201	chr4:40720154-40722398	-	lincRNA	36.5498	30.7371	31.6708	5.64218	5.84363	14.8734	32.9859	8.78641	3.75419	1.9085	0.00238928	0.0924385
ENSMUST00000196466.1	Snhg8	Snhg8-201	chr3:123507552-123508404	-	lincRNA	709.536	632.898	585.743	356.999	307.596	391.674	642.726	352.09	1.82546	0.868259	0.0026195	0.0924437
ENSMUST00000150301.1	Ubr3	Ubr3-209	chr2:70009007-70016465	+	processed_transcript	753.954	617.894	664.556	282.014	379.613	369.178	678.801	343.602	1.97555	0.982252	0.00267453	0.0925105
ENSMUST00000224200.1	Zeb1	Zeb1-212	chr18:5591965-5641385	+	processed_transcript	763.546	557.898	694.166	194.015	223.992	281.622	671.87	233.21	2.88097	1.52656	0.00260766	0.0926518
ENSMUST00000211281.1	Plpbp	Plpbp-210	chr8:27042825-27044686	+	processed_transcript	38.9119	28.0695	34.9799	7.05703	12.9569	6.23543	33.9871	8.74978	3.88433	1.95767	0.00269686	0.092669
ENSMUST00000129240.7	Gtdc1	Gtdc1-204	chr2:44633129-44927264	-	processed_transcript	48.0189	41.3923	53.4756	5.65831	1	16.5347	47.629	7.73102	6.16076	2.62311	0.00230764	0.0927138
ENSMUST00000161456.1	Sdha	Sdha-207	chr13:74344917-74350235	-	processed_transcript	34.7818	26.8702	38.1143	8.89414	1.15332	7.66042	33.2554	5.90263	5.63401	2.49416	0.00264502	0.0927177
ENSMUST00000176039.1	Pon3	Pon3-205	chr6:5254580-5255567	-	processed_transcript	34.1492	34.6357	43.222	2.26686	12.5924	9.42536	37.3356	8.09489	4.61225	2.20547	0.00232567	0.092725
ENSMUST00000187876.6	Lncpint	Lncpint-203	chr6:31093559-31218474	-	lincRNA	279.384	204.92	290.241	68.8391	19.9089	39.0807	258.182	42.6096	6.05924	2.59914	0.0020776	0.0927461
ENSMUST00000132069.1	Gm15859	Gm15859-201	chr16:4729869-4730809	+	antisense_RNA	105.341	100.179	112.049	37.6993	48.9732	61.8836	105.856	49.5187	2.1377	1.09606	0.00193574	0.0927557
ENSMUST00000149354.1	Rsrp1	Rsrp1-206	chr4:134924710-134925355	+	processed_transcript	207.709	153.011	179.118	30.1739	38.9894	64.2823	179.946	44.4819	4.04538	2.01627	0.00197211	0.0927957
ENSMUST00000146225.7	Atp5j	Atp5j-209	chr16:84829548-84833876	-	processed_transcript	177.619	132.845	146.52	53.076	62.4935	62.1513	152.328	59.2403	2.57135	1.36253	0.00238517	0.0929681
ENSMUST00000227218.1	AC154760.1	AC154760.1-201	chr14:118982994-118983760	-	lincRNA	121.265	100.589	129.156	48.8163	61.4128	54.1784	117.003	54.8025	2.135	1.09424	0.0025644	0.0930129
ENSMUST00000189045.1	5031425E22Rik	5031425E22Rik-204	chr5:23432287-23434269	-	lincRNA	125.539	237.907	194.166	574.406	452.091	571.208	185.87	532.569	0.349008	-1.51867	0.0026032	0.0931268
ENSMUST00000141138.7	Pole4	Pole4-203	chr6:82647316-82652520	-	processed_transcript	41.7058	31.9267	41.4854	11.2735	15.5987	14.8401	38.3726	13.9041	2.7598	1.46457	0.00217569	0.0931447
ENSMUST00000146300.1	Afap1	Afap1-203	chr5:35893465-35905693	+	processed_transcript	45.6465	39.5053	41.0765	18.7269	22.0459	25.8281	42.0761	22.2003	1.89529	0.922421	0.00196259	0.0931871
ENSMUST00000208509.1	2310057M21Rik	2310057M21Rik-205	chr7:131361783-131362710	-	processed_transcript	1	1	12.9011	32.5458	33.1329	36.2071	4.96703	33.9619	0.146253	-2.77346	0.00216086	0.093274
ENSMUST00000133400.1	C030013C21Rik	C030013C21Rik-201	chr11:80507410-80509106	-	sense_intronic	39.5424	40.7488	45.8226	16.5337	20.3255	24.9549	42.0379	20.6047	2.04021	1.02872	0.00230563	0.0933513
ENSMUST00000135022.1	Lrp8	Lrp8-207	chr4:107850128-107856864	+	processed_transcript	56.8484	42.2657	70.4544	1	1	1.58696	56.5228	1.19565	47.2736	5.56296	0.00244882	0.0933589
ENSMUST00000141543.1	C230035I16Rik	C230035I16Rik-201	chr13:23427975-23431022	-	lincRNA	93.2977	110.475	98.9591	21.1281	48.49	32.7583	100.911	34.1254	2.95705	1.56416	0.00207492	0.0934252
ENSMUST00000160229.1	Zmiz1	Zmiz1-204	chr14:25607838-25645735	+	processed_transcript	106.033	113.841	104.567	202.789	190.497	164.999	108.147	186.095	0.581137	-0.783051	0.0024688	0.0934388
ENSMUST00000223931.1	Rps24	Rps24-203	chr14:24487125-24493493	+	processed_transcript	1115.9	1110.21	1050.54	569.303	742.133	736.973	1092.21	682.803	1.5996	0.677715	0.00248708	0.0934533
ENSMUST00000079529.6	Airn	Airn-201	chr17:12741374-12815557	+	antisense_RNA	470.393	388.869	509.637	38.7703	110.514	170.412	456.3	106.565	4.28187	2.09824	0.00256143	0.0935551
ENSMUST00000151131.7	Uap1l1	Uap1l1-205	chr2:25361490-25363698	-	processed_transcript	67.8627	56.9806	50.0226	23.5424	22.3858	21.8415	58.2886	22.5899	2.5803	1.36754	0.00238411	0.0936258
ENSMUST00000177896.7	Rab10os	Rab10os-202	chr12:3235526-3250377	+	antisense_RNA	54.8722	53.537	59.2417	37.9877	40.7954	42.7079	55.8836	40.497	1.37994	0.46461	0.00220496	0.0936301
ENSMUST00000132265.1	Park7	Park7-207	chr4:150897384-150901835	-	processed_transcript	87.1321	82.9237	89.4602	60.6248	61.5193	49.8826	86.5054	57.3422	1.50858	0.593191	0.00225883	0.0936341
ENSMUST00000137894.1	Synpo	Synpo-207	chr18:60605883-60660142	-	processed_transcript	103.708	113.043	84.2706	39.4397	40.1177	45.654	100.34	41.7371	2.4041	1.2655	0.00253131	0.0937662
ENSMUST00000155352.1	Mllt10	Mllt10-211	chr2:18064841-18065255	+	processed_transcript	38.785	43.1493	44.8975	89.6452	71.0563	86.1138	42.2773	82.2718	0.513873	-0.960515	0.0026032	0.0937689
ENSMUST00000198395.4	Gm36535	Gm36535-201	chr5:111791555-111805689	+	lincRNA	159.359	154.083	149.911	34.801	63.2163	80.5765	154.451	59.5313	2.59445	1.37543	0.00222825	0.093856
ENSMUST00000190059.6	Tmem181b-ps	Tmem181b-ps-204	chr17:6440478-6449095	-	processed_transcript	316.821	309.78	345.986	147.425	169.225	209.116	324.196	175.255	1.84985	0.887408	0.00215926	0.0939816
ENSMUST00000176760.1	Gm20632	Gm20632-201	chr3:96239393-96241819	+	antisense_RNA	106.666	100.024	106.825	53.1469	65.3529	72.2591	104.505	63.5863	1.64352	0.716785	0.0024472	0.0939831
ENSMUST00000133399.1	Lrch3	Lrch3-202	chr16:32954698-32961734	+	processed_transcript	43.4975	31.238	45.7244	1	1	9.2175	40.1533	3.73917	10.7386	3.42473	0.00230354	0.0939952
ENSMUST00000173071.1	Mtmr12	Mtmr12-203	chr15:12223354-12245052	+	processed_transcript	42.5102	30.2342	36.0105	2.75899	2.53349	10.7021	36.2516	5.33152	6.79949	2.76543	0.00225067	0.0940419
ENSMUST00000115107.7	Lncpint	Lncpint-201	chr6:31165523-31218433	-	lincRNA	197.839	211.427	219.468	31.6576	78.3782	98.7764	209.578	69.6041	3.011	1.59024	0.00256042	0.0941765
ENSMUST00000181687.1	Gm26534	Gm26534-201	chr11:60879118-60887218	+	lincRNA	32.3256	29.0426	33.1968	14.5138	12.9131	19.6985	31.5217	15.7085	2.00667	1.0048	0.00277765	0.0942056
ENSMUST00000153313.8	Tug1	Tug1-203	chr11:3639794-3647530	-	antisense_RNA	133.891	198.792	184.372	26.3566	43.219	29.6296	172.352	33.0684	5.21198	2.38183	0.0023809	0.0942079
ENSMUST00000153206.7	Gm12216	Gm12216-206	chr11:53783418-53795875	-	processed_transcript	47.3769	47.0619	55.2336	4.1162	11.0973	21.104	49.8908	12.1058	4.12123	2.04307	0.00252825	0.0943219
ENSMUST00000228254.1	Gm26782	Gm26782-207	chr14:50870384-50871707	+	antisense_RNA	341.321	248.098	252.565	62.5769	63.6803	71.9205	280.661	66.0592	4.24863	2.087	0.00215021	0.0943743
ENSMUST00000066988.1	A430110L20Rik	A430110L20Rik-201	chr1:181226076-181228490	+	lincRNA	75.7783	63.4183	58.5491	9.40159	15.6792	26.0897	65.9152	17.0568	3.86445	1.95026	0.00229954	0.094571
ENSMUST00000180035.7	Tmem181b-ps	Tmem181b-ps-202	chr17:6438524-6449745	-	processed_transcript	125.583	100.076	102.59	58.4923	50.0017	51.9885	109.416	53.4941	2.04539	1.03237	0.00277668	0.0947883
ENSMUST00000220830.1	AC133498.1	AC133498.1-204	chr13:5611460-5638945	-	lincRNA	89.4231	76.8504	74.2697	49.9178	50.0432	47.9955	80.1811	49.3188	1.62577	0.701123	0.00284361	0.0952062
ENSMUST00000127998.1	Psme3	Psme3-202	chr11:101317023-101320024	+	processed_transcript	51.9093	42.5566	40.4058	11.5573	20.5285	16.7567	44.9572	16.2809	2.76135	1.46538	0.00282651	0.0952443
ENSMUST00000168961.7	Gm20498	Gm20498-204	chr12:81474617-81532877	-	processed_transcript	68.5544	64.8143	56.4897	29.7151	23.4295	36.3409	63.2861	29.8285	2.12166	1.0852	0.00291308	0.0956921
ENSMUST00000161397.1	Gm15562	Gm15562-201	chr14:46961440-46965684	+	sense_intronic	69.8549	62.2015	75.9986	3.4988	15.8054	28.4325	69.3517	15.9122	4.35839	2.1238	0.00290147	0.0959139
ENSMUST00000198346.1	Tmem175	Tmem175-205	chr5:108644325-108645116	+	processed_transcript	46.5238	35.2836	41.8751	17.2453	10.7793	18.0914	41.2275	15.372	2.68199	1.4233	0.00293882	0.0959343
ENSMUST00000146585.1	Sec14l1	Sec14l1-205	chr11:117115252-117128763	+	processed_transcript	98.0983	103.509	135.708	33.8076	18.9782	34.8042	112.439	29.1967	3.85108	1.94526	0.00288976	0.0961353
ENSMUST00000017922.8	Cox7c	Cox7c-201	chr13:86044895-86046774	-	processed_transcript	945.21	886.431	859.28	245.255	443.05	487.253	896.974	391.853	2.28906	1.19475	0.00301514	0.0966139
ENSMUST00000189436.1	Ndufv3	Ndufv3-204	chr17:31520150-31527839	+	processed_transcript	20.6217	30.3306	31.4271	176.581	211.153	278.95	27.4598	222.228	0.123566	-3.01665	0.00299758	0.0966443
ENSMUST00000152728.1	Rab1a	Rab1a-205	chr11:20201609-20223572	+	processed_transcript	775.381	554.479	612.996	17.8795	151.373	177.551	647.619	115.601	5.60217	2.48599	0.00297976	0.0966664
ENSMUST00000150955.1	Rpl23	Rpl23-203	chr11:97778056-97778635	-	processed_transcript	107.618	111.693	124.092	23.2962	53.9062	52.576	114.468	43.2595	2.64607	1.40385	0.00308509	0.097657
ENSMUST00000219483.1	Frs2	Frs2-204	chr10:117082805-117148495	-	processed_transcript	137.561	118.465	105.816	15.5257	42.779	46.3998	120.614	34.9015	3.45585	1.78904	0.0030837	0.0982082
ENSMUST00000189489.1	2310020H05Rik	2310020H05Rik-201	chr13:99076526-99087921	-	lincRNA	141.64	125.374	123.024	26.9446	67.5963	37.1604	130.013	43.9004	2.96153	1.56634	0.00313294	0.0985745
ENSMUST00000134375.7	Scmh1	Scmh1-209	chr4:120405281-120454515	+	processed_transcript	85.4567	63.7608	61.7485	23.7313	11.9132	10.9762	70.322	15.5402	4.52516	2.17797	0.00315287	0.0986076
ENSMUST00000154447.1	Srsf10	Srsf10-210	chr4:135856112-135858801	+	processed_transcript	99.7006	107.333	101.951	7.06451	44.1328	1.78628	102.995	17.6612	5.83171	2.54392	0.00321734	0.0994328
ENSMUST00000219538.1	Max	Max-207	chr12:76953218-76954409	-	processed_transcript	170.23	136.477	124.332	35.5942	36.4302	59.517	143.68	43.8471	3.27683	1.7123	0.00321725	0.100022
ENSMUST00000218902.1	AC167229.2	AC167229.2-201	chr10:100129868-100144126	-	lincRNA	256.092	205.279	258.582	61.1857	27.9914	103.809	239.984	64.3285	3.7306	1.89941	0.00328878	0.100452
ENSMUST00000206143.1	Ypel3	Ypel3-211	chr7:126776999-126780513	+	processed_transcript	29.6425	40.1104	27.8105	1	7.88833	7.0124	32.5211	5.30024	6.13578	2.61725	0.00347138	0.100728
ENSMUST00000126737.7	Hnrnph1	Hnrnph1-205	chr11:50377751-50386528	+	processed_transcript	96.5871	92.158	93.3129	42.9201	3.47995	13.1907	94.0194	19.8636	4.73325	2.24283	0.00341798	0.100859
ENSMUST00000160210.1	Pam	Pam-208	chr1:97822724-97825985	-	processed_transcript	121.649	171.357	154.008	41.4035	23.0809	56.8399	149.004	40.4414	3.68445	1.88145	0.00345747	0.100885
ENSMUST00000168835.1	C230037L18Rik	C230037L18Rik-203	chr15:89477739-89484782	+	antisense_RNA	41.9361	23.9406	34.6245	1	1	1	33.5004	1	33.5004	5.06611	0.00340121	0.100935
ENSMUST00000151461.7	Zmym6	Zmym6-206	chr4:127077442-127107644	+	processed_transcript	102.975	92.1611	107.118	33.9961	59.7938	43.9073	100.752	45.8991	2.19507	1.13426	0.003286	0.100957
ENSMUST00000132918.7	Orc3	Orc3-204	chr4:34571565-34598751	-	processed_transcript	173.57	137.027	153.13	1	59.773	31.2704	154.576	30.6811	5.03813	2.33289	0.0034486	0.101191
ENSMUST00000125272.1	Flt1	Flt1-204	chr5:147604660-147634418	-	processed_transcript	42.1041	55.0187	42.9785	10.3733	20.403	14.4642	46.7004	15.0802	3.09681	1.63078	0.0034003	0.101484
[truncated: 5,046 more rows]
